# Supplementary material for: Resolving colistin resistance and heteroresistance in Enterobacter species
Source: Research Square preprint supplement (doi:10.21203/rs.3.rs-1894580/v1), 2022-08-03
Supplement: Supplementary file 1 [file 14daa75a64207590bf665075.xlsx]

## Sheet: Lipid A species
Exact neutral mass [Da]	Lipid A-species	P	3-OH C14:0	sum sec. FA	Ara4N	sum formula	detected m/z, [M-2H]2-	Accuracy [Dppm] - [M-2H]2-	detected m/z, [M-H]-	Accuracy [Dppm] - [M-H]-
1360.83	tetra-acyl	2	3	12:0	0	C66H126O22N2P2	679.407	0.588749	1359.82	-1.83848
1374.84	tetra-acyl	2	3	13:0	0	C67H128O22N2P2	686.415	0.582738
1388.86	tetra-acyl	2	3	14:0	0	C68H130O22N2P2	693.423	0.576849	1387.85	-2.16162
1404.85	tetra-acyl	2	4	-	0	C68H130O23N2P2	701.42	0.427704
1491.89	tetra-acyl + 1 Ara4N	2	3	12:0	1	C71H135O25N3P2	744.936	0.268479	1490.88	-0.87197
1519.92	tetra-acyl + 1 Ara4N	2	3	14:0	1	C73H139O25N3P2	758.952	0.395282	1518.91	-1.11922
1542.99	penta-acyl	2	3	24:0	0	C78H148O23N2P2	770.49	0.259575
1571.03	penta-acyl	2	3	26:0	0	C80H152O23N2P2	784.506	0.127469	1570.02	-1.84712
1585.04	penta-acyl	2	3	27:0	0	C81H154O23N2P2	791.514	0.505361
1587.02	penta-acyl	2	4	12:0	0	C80H152O24N2P2	792.504	0.378547
1599.06	penta-acyl	2	3	28:0	0	C82H156O23N2P2	798.521	-0.125231	1598.05	-2.31533		Explanation: All detected lipid A molecules ionize as doubly charged (z = 2) species, some of them can be detected as singly charged (z = 1) species as well.
1613.07	penta-acyl	2	3	29:0	0	C83H158O23N2P2	805.529	0
1615.05	penta-acyl	2	4	14:0	0	C82H156O24N2P2	806.519	0.247979	1614.05	-2.23043
1627.09	penta-acyl	2	3	30:0	0	C84H160O23N2P2	812.537	0.123071	1626.08	-2.33691
1643.08	penta-acyl	2	4	16:0	0	C84H160O24N2P2	820.535	0.121872
1702.08	penta-acyl + 1 Ara4N	2	3	26:0	1	C85H161O26N3P2	850.035	0.235284
1717.25	hexa-acyl - P	1	4	26:0	0	C94H177O22N2P1	857.62	0.233204	1716.25	-1.2236
1718.08	penta-acyl + 1 Ara4N	2	4	12:0	1	C85H161O27N3P2	858.033	0.233091
1730.12	penta-acyl + 1 Ara4N	2	3	28:0	1	C87H165O26N3P2	864.051	0
1741.16	hexa-acyl	2	4	22:0	0	C90H170O25N2P2	869.571	0.229998
1745.28	hexa-acyl - P	1	4	28:0	0	C96H181O22N2P1	871.635	0.229454	1744.28	-1.43326
1746.11	penta-acyl + 1 Ara4N	2	4	14:0	1	C87H165O27N3P2	872.048	0
1755.17	hexa-acyl	2	4	23:0	0	C91H172O25N2P2	876.579	0.11408
1758.15	penta-acyl + 1 Ara4N	2	3	30:0	1	C89H169O26N3P2	878.066	0.227773
1769.19	hexa-acyl	2	4	24:0	0	C92H174O25N2P2	883.587	0	1768.18	-1.80977
1783.2	hexa-acyl	2	4	25:0	0	C93H176O25N2P2	890.595	0.112285
1797.22	hexa-acyl	2	4	26:0	0	C94H178O25N2P2	897.602	0	1796.21	-1.89288
1811.23	hexa-acyl	2	4	27:0	0	C95H180O25N2P2	904.61	0	1810.23	-2.15443
1813.21	hexa-acyl, additional OH-group	2	4	26:0 OH	0	C94H178O26N2P2	905.6	-0.110424
1825.25	hexa-acyl	2	4	28:0	0	C96H182O25N2P2	911.618	-0.109695	1824.24	-2.13788
1839.27	hexa-acyl	2	4	29:0	0	C97H184O25N2P2	918.626	-0.217717
1841.25	hexa-acyl, additional OH-group	2	4	28:0 OH	0	C96H182O26N2P2	919.615	-0.217482
1853.28	hexa-acyl	2	4	30:0	0	C98H186O25N2P2	925.633	-0.756239
1861.17	penta-acyl + 2 Ara4N	2	3	28:0	2	C92H174O29N4P2	929.58	-0.215151
1877.19	hexa-acyl + P	3	4	26:0	0	C94H179O28N2P3	937.586	-0.106657
1900.25	hexa-acyl + 1 Ara4N	2	4	24:0	1	C97H183O28N3P2	949.116	0.210722
1905.22	hexa-acyl + P	3	4	28:0	0	C96H183O28N2P3	951.601	0.105086
1914.26	hexa-acyl + 1 Ara4N	2	4	25:0	1	C98H185O28N3P2	956.124	0.104589
1920.23	hexa-acyl + 1 P-EtN	2	4	26:0	1 (P-EtN)	C96H184O28N3P3	959.107	0
1928.28	hexa-acyl + 1 Ara4N	2	4	26:0	1	C99H187O28N3P2	963.132	0.207656	1927.27	-3.37266
1942.29	hexa-acyl + 1 Ara4N	2	4	27:0	1	C100H189O28N3P2	970.139	-0.103078
1944.27	hexa-acyl, additional OH-group + 1 Ara4N	2	4	26:0 OH	1	C99H187O29N3P2	971.129	0
1948.26	hexa-acyl + 1 P-EtN	2	4	28:0	1 (P-EtN)	C98H188O28N3P3	973.122	-0.51381
1956.31	hexa-acyl + 1 Ara4N	2	4	28:0	1	C101H191O28N3P2	977.147	0	1955.3	-3.83574
1970.32	hexa-acyl + 1 Ara4N	2	4	29:0	1	C102H193O28N3P2	984.155	-0.10161
1972.3	hexa-acyl, additional OH-group + 1 Ara4N	2	4	28:0 OH	1	C101H191O29N3P2	985.145	0
2007.42	hepta-acyl	2	4	40:0	0	C108H204O26N2P2	1002.7	-0.0997306
2021.43	hepta-acyl	2	4	41:0	0	C109H206O26N2P2	1009.71	-0.198077
2035.45	hepta-acyl	2	4	42:0	0	C110H208O26N2P2	1016.72	-0.196712
2049.46	hepta-acyl	2	4	43:0	0	C111H210O26N2P2	1023.72	-0.39073
2059.34	hexa-acyl + 2 Ara4N	2	4	26:0	2	C104H196O31N4P2	1028.66	-0.291641
2063.48	hepta-acyl	2	4	44:0	0	C112H212O26N2P2	1030.73	-0.194037
2087.37	hexa-acyl + 2 Ara4N	2	4	28:0	2	C106H200O31N4P2	1042.68	-0.287721
2138.48	hepta-acyl + 1 Ara4N	2	4	40:0	1	C113H213O29N3P2	1068.23	-0.187226
2166.51	hepta-acyl + 1 Ara4N	2	4	42:0	1	C115H217O29N3P2	1082.25	-0.277201
2194.54	hepta-acyl + 1 Ara4N	2	4	44:0	1	C117H221O29N3P2	1096.26	-0.364876
2325.6	hepta-acyl + 2 Ara4N	2	4	44:0	2	C122H230O32N4P2	1161.79	-0.860741
	0 Ara4N
	1 P-EtN
	1 Ara4N
	2 Ara4N

## Sheet: NormMonoIso
	Strain:	E. asburiae BK5433				E. bugandensis RBG-17-0246-1				E. cancerogenous RPK-18-0479-1				E. chengduensis RBK-18-0141-1					E. cloacae RPK-18-0157-1				E. kobei BK6664			E. ludwigii F8789				E. wuhouensis F00728				E. roggenkampii RPB-17-0516-2			E. mori RBL-17-0354-2				E. vonholyi F-147				E. xiangfangensis BK4615
	Colistin concentration:	0 mg/L				0 mg/L				0 mg/L				0 mg/L				0 mg/L				0 mg/L				0 mg/L				0 mg/L				0 mg/L			0 mg/L				0 mg/L				0 mg/L		2 mg/L
Detected mass peak		I	II	III		I	II	III		I	II	III		I	II	III		I	II	III		I	II	III		I	II	III		I	II	III		I	II		I	II	III		I	II	III		I	II	I	II
m/z
679.407		103407	143889	21668.4		0	0	0		203049	229570	90884		12626.6	60530.5	16577.1		17792.3	43115.4	74499.4		312607	72438.4	249106		1.0082e+06	543969	393724		61196.8	88102.8	73094.1		420132	203456		307852	159913	469237		22911.5	41397.4	70886		333908	191838	0	16027.3
686.415		0	0	0		0	0	0		0	0	0		0	0	0		0	0	0		29321	0	0		0	0	0		9472.8	10229.4	11824.6		0	28961.4		0	0	10180.6		0	8733.2	9805.1		6465.6	45760.3	0	0
693.423		148776	204147	44953.4		230999	99273.7	325195		0	0	0		132645	361136	118073		178695	289498	474682		1.10668e+06	256004	573617		17217.6	10709.7	0		487269	567797	564871		352672	808402		0	0	7694.6		357453	489152	663800		1.24195e+06	1.19496e+06	17161.3	162503
701.42		6636.5	8686.2	0		0	0	0		0	0	0		0	0	0		0	0	0		0	0	0		0	0	0		0	0	0		0	0		0	0	0		0	0	0		0	0	0	0
744.936		10938.8	0	0		0	0	0		75558.9	47905.6	37956		0	10749.2	0		0	0	0		0	0	0		10631.5	14362.4	6287.7		0	0	0		13541.9	8525.3		0	0	8799		0	0	0		0	0	0	8578
758.952		29570.1	23347.7	10711.1		129009	95761.7	174446		0	0	0		70123.3	156415	50549.7		36875.7	113074	174239		31843.1	0	0		0	0	0		0	0	0		24155.9	73518.1		0	0	0		0	0	20199.2		0	0	33568.7	192674
770.49		0	0	0		0	0	0		0	0	0		0	0	0		0	0	0		0	0	0		0	14530.4	0		0	0	0		0	4488.3		0	0	0		0	0	0		0	0	0	0
784.506		15568.5	0	0		0	0	0		20454.8	15965.3	0		0	0	0		0	0	0		20688.9	0	20625.7		153031	169065	96889.6		10610.2	0	14324.2		48048.7	70208.9		94089.8	49348.7	143347		0	0	0		57336	107640	0	0
791.514		0	0	0		0	0	0		0	0	0		0	0	0		0	0	0		0	0	0		0	0	0		0	0	0		0	0		0	0	0		0	0	0		0	7233.9	0	0
792.504		12827.2	0	5161.6		0	0	0		16746.4	15636	0		0	14393.2	0		0	0	0		30401.2	7222.5	0		53683.9	66343	26590.2		13093.5	0	0		22057.3	26486.6		26479.3	0	53704.4		0	12007.2	15999.1		20189.1	53733.1	22147.4	9116.2
798.521		39038.7	75064.2	0		70154.6	29085.6	72464.9		0	0	0		23932.1	52614.1	16522.3		0	85278.4	85244.2		237952	38510.6	120043		99748.8	88012.4	50924.6		185223	145151	175824		78654	217078		0	0	8641.5		72873.1	136831	189785		187080	412605	0	33035.9
805.529		0	0	0		0	0	0		0	0	0		0	0	0		0	0	0		0	0	0		0	0	0		0	0	0		0	0		0	0	0		0	0	0		0	0	0	0
806.519		36865.7	41541.3	6825.4		72781.6	46789.9	110040		0	0	0		50566.2	115022	27598.6		31135.3	80526.5	172246		353470	91417.7	125591		0	14810.6	7348.6		116425	90024.4	134502		33806	118465		13813.6	10418	41449.7		65159.1	112009	198345		114460	305766	26109	25691
812.537		0	0	0		0	0	0		0	0	0		0	57324.7	0		0	0	0		101692	17388.6	0		0	0	0		28224.1	10672.3	25523.3		49402	170980		0	0	0		0	0	0		88347.5	162039	0	0
820.535		0	0	0		0	0	0		15196.5	0	0		0	0	0		16442.4	0	40217.1		0	0	0		0	0	0		0	0	0		0	0		0	0	0		0	11054.4	36561.4		0	0	0	19650.3
850.035		0	0	0		0	0	0		51224.7	7444.6	20306.9		0	0	0		0	0	0		0	0	0		6150.5	0	0		0	0	0		13163.1	0		0	0	0		0	0	0		0	0	0	12168.3
857.62		0	15642.6	0		0	0	0		13219.1	0	0		0	0	0		0	0	0		0	0	0		0	16555.2	0		0	0	0		0	0		29414	20069.3	21286.2		0	0	0		0	0	0	0
858.033		0	0	0		0	0	0		0	0	0		0	0	0		0	0	0		0	0	0		0	0	0		0	0	0		0	0		0	0	0		0	0	0		0	0	0	0
864.051		21990.5	28169.9	0		74325.1	47851.2	88945.5		0	0	0		24742.1	58929.4	9908.8		16788.6	33439.6	48172.1		0	0	0		0	0	0		0	0	0		16444.1	57277.2		0	0	0		0	0	0		0	0	15522	99876.4
869.571		0	0	0		0	0	0		0	0	0		0	0	0		0	0	0		0	0	0		5712	15387.6	0		0	0	0		0	5030.4		0	0	0		0	0	0		0	0	0	0
871.635		15472.2	0	0		0	0	0		0	0	0		0	0	0		0	9013.3	0		0	0	0		0	0	0		11199	11382.2	30606.3		0	16525.6		0	0	0		21321.1	0	12719.9		10521.7	46647.8	0	0
872.048		0	0	0		35160.2	23457.4	39487.6		0	0	0		14869.1	52186.8	0		0	16251.6	27336.6		0	0	0		0	0	0		0	0	0		0	16303.2		0	0	0		0	0	0		0	0	0	37219
876.579		0	0	0		0	0	0		0	0	0		0	0	0		0	0	0		0	0	0		0	0	0		0	0	0		0	0		0	0	16401		0	0	0		0	5321.5	0	0
878.066		0	0	0		0	0	0		0	0	0		0	0	0		0	0	0		0	0	0		0	0	0		0	0	0		0	0		0	0	0		0	0	0		0	0	0	0
883.587		76930.4	91854.8	5465.3		7420.5	0	0		104099	63774.8	42802.4		13474.2	13234	0		0	16960.5	12567.4		277240	69415.5	137212		238109	311157	204385		33296.5	33878.4	34414.9		107582	99036.5		151971	82334.4	216222		0	0	12027.6		111373	192628	0	0
890.595		33646.3	27610.3	0		0	0	0		0	0	0		0	9642	0		0	0	0		88527.6	25828	27151.4		48616.7	94207.9	37909.3		19111.1	18665.5	23546.8		6961.2	61533.9		108578	43826.6	144222		0	18328.1	0		0	114976	0	0
897.602		580514	705750	155196		259905	145828	304002		844171	483078	537591		184709	406158	127976		196258	323759	427231		2.38943e+06	745932	1.1456e+06		1.85247e+06	2.2654e+06	1.47663e+06		552574	507337	649094		784979	849778		1.25414e+06	639607	1.4325e+06		191353	313074	379266		900084	1.61783e+06	34421.2	130730
904.61		76549.6	93391.6	6714.5		23181	0	18004.9		0	0	0		0	26063.7	8629.6		0	15084.7	17192.6		330132	74554.9	154932		22575.7	33986.3	8315.8		132542	111474	119049		15157.9	177474		25461.7	21732.3	37123.4		38184.1	81874.8	117525		25006.8	419002	0	18194.9
905.6		0	0	0		27315.2	0	14345.5		0	0	0		35892.4	58212.2	0		0	49201.3	59305.2		316484	74831.1	71844.4		0	0	0		0	0	0		66090.8	45891.1		0	0	0		0	21129.7	48451.1		0	0	0	0
911.618		795253	988710	203889		1.31988e+06	722815	1.50853e+06		13389.4	0	11022.2		591463	1.08472e+06	418337		757719	1.06634e+06	1.28522e+06		5.43365e+06	1.48989e+06	2.33635e+06		79703.5	108861	47866.7		2.15424e+06	1.84829e+06	2.22857e+06		630552	2.07231e+06		30807.8	8773.8	46024.4		1.13949e+06	1.6747e+06	2.005e+06		2.56433e+06	5.67912e+06	163863	392540
918.626		0	12156.6	0		0	0	0		0	0	0		0	0	0		0	0	0		29939.4	9670.8	0		0	0	0		31639	13000.4	8857.4		0	32305.1		0	0	0		0	0	7377		0	126763	0	0
919.615		0	0	0		200237	113418	256521		0	0	0		175640	287329	80509.8		166795	302899	378381		1.01566e+06	277841	328147		0	0	0		0	0	0		76311.7	181023		0	0	0		110675	257540	294779		0	8513.4	0	0
925.633		0	0	0		0	0	0		0	0	0		0	0	0		0	0	0		33937.8	0	0		6415.6	0	0		0	0	15128.7		38832.5	18818.6		0	0	0		0	0	0		12728.6	57092.3	0	0
929.58		0	0	0		9093	0	0		0	0	0		0	0	0		0	0	0		0	0	0		0	0	0		0	0	0		0	0		0	0	0		0	0	0		0	0	0	0
937.586		0	0	0		0	0	0		0	0	0		0	0	0		0	0	0		0	0	0		22167.6	16790.4	0		0	0	0		22032.2	0		0	0	0		0	0	0		18903.4	0	0	0
949.116		16034	13997.2	0		0	0	0		50717.6	18281.2	26142.8		0	0	0		0	0	0		0	0	0		0	9435.6	0		0	0	0		20701.4	7508		0	6232.6	0		0	0	0		0	0	0	11564
951.601		0	0	0		0	0	0		0	0	0		0	0	0		0	0	0		66642.1	9720.6	0		0	0	0		0	0	0		5714.5	0		0	0	0		0	0	0		62945.8	42765.3	0	0
956.124		19748.5	19021.9	0		0	0	0		0	0	10128.5		0	0	0		0	0	0		22899.6	0	0		0	0	0		0	0	0		0	28926.8		0	0	0		0	0	0		0	0	0	0
959.107		0	0	0		0	0	0		0	0	0		0	0	0		0	0	0		0	0	0		17938.6	0	0		0	0	0		11204	0		0	0	0		0	0	0		0	0	0	0
963.132		194841	243146	38761		164592	119272	131286		591442	271424	402647		80400.1	151701	54307		60352.8	196242	192288		243681	62833.5	99129.7		231012	217326	164177		0	0	0		215667	169757		118296	84147.3	123213		0	0	12599.5		0	0	88600.9	194496
970.139		50002.5	40437	7504.5		39426.5	32303.3	27862.8		0	0	0		15962.5	38929.9	0		0	24680.2	39419.4		46200.7	12830.3	22805.2		0	4963.7	0		0	0	0		4028	110290		0	0	0		0	0	10874.1		0	0	14209.3	60263.9
971.129		0	0	0		17564.9	11663.6	0		0	0	0		13643.3	51696.9	16705.1		0	37186.9	14063.3		0	0	0		0	0	0		0	0	0		17912.8	5888.3		0	0	0		0	0	0		0	0	0	0
973.122		0	0	0		0	0	0		0	0	0		0	0	0		0	0	0		0	0	0		0	0	0		0	0	0		4358.2	0		0	0	0		0	0	0		0	8267.4	0	0
977.147		285724	359741	81771.7		877395	652228	924949		8833.5	0	0		381658	584375	275628		312794	510420	579952		504916	169025	286208		0	17669.7	0		0	0	0		225508	514953		0	0	0		46590.7	89536.4	133418		0	26247.1	244614	653863
984.155		5891.9	0	0		0	0	0		0	0	0		0	0	0		0	0	0		0	0	0		0	0	0		0	0	0		0	17430.2		0	0	0		0	0	0		0	0	0	6494.7
985.145		0	0	0		171785	111457	154995		0	0	0		136654	319386	130297		55125.3	175241	146508		41447	7429.1	0		0	0	0		0	0	0		25753.3	50962.3		0	0	0		0	18872.3	24206.1		0	0	0	0
1002.7		0	0	0		0	0	0		0	0	0		0	0	0		0	0	0		0	0	0		22091	39100.6	12220.7		0	0	0		6535	5227.7		0	0	0		0	0	0		0	11909.4	0	0
1009.71		0	0	0		0	0	0		0	0	0		0	0	0		0	0	0		0	0	0		0	0	0		0	0	0		0	0		0	0	0		0	0	0		0	0	0	0
1016.72		42565.5	60976.6	0		0	0	0		50061.4	11065.2	15525.2		0	34475.7	0		0	0	0		211658	87150.3	51179.3		222814	319638	271885		27874.4	15396.2	31121.7		90683.9	143455		66086.7	20841.7	71568.8		0	0	0		26601.4	187329	0	0
1023.72		0	0	0		0	0	0		0	0	0		0	0	0		0	0	0		0	0	0		0	0	0		0	0	0		0	22158.1		0	0	0		0	0	0		0	22756.5	0	0
1028.66		7679	0	0		0	0	0		104362	29399.3	55819.5		0	10778.1	0		0	27752.7	25154.2		0	0	0		0	0	0		0	0	0		0	0		0	0	0		0	0	0		0	0	18194.1	16295.1
1030.73		56575.3	75961.1	0		21233	10072.8	32780.4		0	0	0		54853.7	129956	23638.1		18245.6	46126.6	19056		475360	147693	217539		0	6316	0		179885	134562	142020		87885.5	315945		0	0	0		0	0	0		151958	608988	0	0
1042.68		14837	18262	0		75910	45043.6	53448.5		0	0	0		27587.1	63132.1	17024.6		0	68490	42991.4		0	0	0		0	0	0		0	0	0		0	0		0	0	0		0	0	0		0	0	56281.6	97678.5
1068.23		0	0	0		0	0	0		0	0	0		0	0	0		0	0	0		0	0	0		0	0	0		0	0	0		0	0		0	0	0		0	0	0		0	0	0	0
1082.25		0	9849.9	0		0	0	0		0	0	0		0	0	0		0	0	0		0	0	0		13759.2	21289	17596.6		0	0	0		13934.7	20394.1		0	0	0		0	0	0		0	0	0	0
1096.26		8212.2	0	0		14565	0	0		0	0	0		19571.3	29819.8	0		0	14263.7	0		0	0	0		0	0	0		0	0	0		16638.2	95094.1		0	0	0		0	0	0		0	0	0	38115.1
1161.79		0	0	0		0	0	0		0	0	0		0	0	0		0	0	0		0	0	0		0	0	0		0	0	0		0	0		0	0	0		0	0	0		0	0	0	0
1359.82		0	0	0		0	0	0		11606.3	25525	0		0	0	0		0	0	0		0	0	0		236923	96660.5	56590.5		0	0	0		114677	27761.9		19838.8	0	50062.3		0	0	0		86608.4	54694.7	0	0
1387.85		10192.8	12755.3	0		11806.5	0	26559.7		0	0	0		0	35579.1	0		0	26671.7	55132.8		122067	44645.4	30717.6		0	0	0		95903.1	88036	88419.6		88640.5	130262		0	0	0		30369.7	62798.9	129142		312790	406223	0	33323
1490.88		0	0	0		0	0	0		0	0	0		0	0	0		0	0	0		0	0	0		0	0	0		0	0	0		0	0		0	0	0		0	0	0		0	0	0	0
1518.91		0	0	0		0	0	0		0	0	0		0	0	0		0	0	0		0	0	0		0	0	0		0	0	0		0	0		0	0	0		0	0	0		0	0	0	22630.6
1570.02		0	0	0		0	0	0		0	0	0		0	0	0		0	0	0		0	0	0		11976.2	9887.4	0		0	0	0		4744.3	0		0	0	0		0	0	0		0	12122.6	0	0
1598.05		0	0	0		0	0	0		0	0	0		0	0	0		0	0	0		13836.9	0	0		0	0	0		10423.9	8783.8	0		9268.9	7318.2		0	0	0		0	0	14932.5		31733.4	106529	0	0
1614.04		0	0	0		0	0	0		0	0	0		0	0	0		0	0	0		0	0	0		0	0	0		0	0	0		0	0		0	0	0		0	0	0		0	26356.1	0	0
1626.08		0	0	0		0	0	0		0	0	0		0	0	0		0	0	0		0	0	0		0	0	0		0	0	0		0	0		0	0	0		0	0	0		0	8277.6	0	0
1716.24		0	13649.3	0		0	0	0		36616.2	14675	0		0	0	0		0	0	0		0	0	0		0	0	0		6614.2	0	0		0	0		41139.4	38404.1	29813.1		0	0	0		0	9619.7	0	0
1744.27		9345.2	28601.4	9808.4		35948.1	35102.8	31762.7		0	0	0		16355.3	30878	0		0	0	34727.6		23024.5	0	0		0	0	0		60286.5	39520	48036.4		0	0		0	0	0		39056.2	44215.2	81066.1		11654.6	89389.2	0	0
1768.18		0	0	0		0	0	0		0	0	0		0	0	0		0	0	0		0	0	0		9981.5	6111.4	0		0	0	0		3232.7	0		0	0	0		0	0	0		0	0	0	0
1796.21		13419.4	18675.7	0		0	0	0		18960	13430.8	0		0	0	0		0	0	0		164156	27642.5	0		156408	129822	46577.9		27371.9	0	0		75096.5	20060.3		34490.3	14399.5	80204.5		0	0	12224.4		84895.2	173274	0	0
1810.22		0	0	0		0	0	0		0	0	0		0	0	0		0	0	0		0	0	0		0	0	0		0	0	0		0	0		0	0	0		0	0	0		0	46114.8	0	0
1824.24		21257.7	59389.7	0		56555	25977.4	83080		0	0	0		0	60092	0		27952.5	18389.5	59834.7		389996	83016.6	54140.1		0	0	0		129632	104650	119313		52517	72100.3		0	0	0		22046.4	85146.7	142974		251760	610282	0	0
1927.26		0	0	0		0	0	0		0	0	0		0	0	0		0	0	0		0	0	0		0	0	0		0	0	0		3884	0		0	0	0		0	0	0		0	0	0	0
1955.29		0	0	0		7262.3	8795.7	0		0	0	0		0	0	0		0	0	0		0	0	0		0	0	0		0	0	0		5519.4	0		0	0	0		0	0	0		0	0	0	0
[truncated: 88 more columns]

## Sheet: Ratio calc_all
	Strain:	E. asburiae BK5433				E. bugandensis RBG-17-0246-1				E. cancerogenous RPK-18-0479-1				E. chengduensis RBK-18-0141-1					E. cloacae RPK-18-0157-1				E. kobei BK6664			E. ludwigii F8789				E. wuhouensis F00728				E. roggenkampii RPB-17-0516-2			E. mori RBL-17-0354-2				E. vonholyi F-147				E. xiangfangensis BK4615
	Colistin concentration:	0 mg/L				0 mg/L				0 mg/L				0 mg/L				0 mg/L				0 mg/L				0 mg/L				0 mg/L				0 mg/L			0 mg/L				0 mg/L				0 mg/L		2 mg/L
Detected mass peak		I	II	III		I	II	III		I	II	III		I	II	III		I	II	III		I	II	III		I	II	III		I	II	III		I	II		I	II	III		I	II	III		I	II	I	II
m/z
679.407		0.0374622	0.0418962	0.0362087		0	0	0		0.0910652	0.184072	0.0726592		0.00607817	0.0138658	0.0119064		0.00939914	0.0120102	0.0166083		0.0216105	0.01856	0.0411614		0.221712	0.116672	0.134564		0.0139588	0.022902	0.0161066		0.107049	0.0285377		0.132554	0.133255	0.155805		0.0106195	0.0119013	0.0152641		0.0497359	0.0145325	0	0.0069905
686.415		0	0	0		0	0	0		0	0	0		0	0	0		0	0	0		0.00202696	0	0		0	0	0		0.00216072	0.00265909	0.00260561		0	0.00406227		0	0	0.00338035		0	0.00251069	0.00211137		0.000963056	0.00346653	0	0
693.423		0.0538981	0.0594414	0.0751188		0.0584289	0.0417784	0.0742675		0	0	0		0.0638524	0.0827258	0.0848057		0.0943993	0.0806423	0.105822		0.0765045	0.0655928	0.0947822		0.00378631	0.00229705	0		0.111145	0.147597	0.124472		0.08986	0.11339		0	0	0.00255491		0.16568	0.140626	0.142938		0.184989	0.0905229	0.0233585	0.0708776
701.42		0.00240426	0.00252916	0		0	0	0		0	0	0		0	0	0		0	0	0		0	0	0		0	0	0		0	0	0		0	0		0	0	0		0	0	0		0	0	0	0
744.936		0.00396289	0	0		0	0	0		0.0338874	0.0384113	0.0303447		0	0.00246233	0		0	0	0		0	0	0		0.00233797	0.0030805	0.00214897		0	0	0		0.00345045	0.0011958		0	0	0.00292161		0	0	0		0	0	0	0.0037414
758.952		0.0107126	0.00679814	0.0178987		0.0326317	0.0403004	0.0398397		0	0	0		0.0337559	0.0358301	0.0363071		0.0194803	0.0314977	0.0388436		0.00220131	0	0		0	0	0		0	0	0		0.00615487	0.010312		0	0	0		0	0	0.00434957		0	0	0.0456908	0.084037
770.49		0	0	0		0	0	0		0	0	0		0	0	0		0	0	0		0	0	0		0	0.00311653	0		0	0	0		0	0.000629551		0	0	0		0	0	0		0	0	0	0
784.506		0.00564013	0	0		0	0	0		0.00917376	0.0128012	0		0	0	0		0	0	0		0.00143022	0	0.00340811		0.0336529	0.0362616	0.0331143		0.00242015	0	0.0031564		0.0122427	0.00984785		0.040513	0.0411223	0.0475966		0	0	0		0.00854024	0.00815416	0	0
791.514		0	0	0		0	0	0		0	0	0		0	0	0		0	0	0		0	0	0		0	0	0		0	0	0		0	0		0	0	0		0	0	0		0	0.000547998	0	0
792.504		0.00464701	0	0.00862523		0	0	0		0.00751058	0.0125371	0		0	0.00329706	0		0	0	0		0.00210163	0.00185053	0		0.0118056	0.0142295	0.00908782		0.00298659	0	0		0.00562015	0.00371514		0.0114014	0	0.0178319		0	0.00345193	0.00344514		0.00300718	0.0040705	0.0301451	0.00397614
798.521		0.0141429	0.0218564	0		0.0177449	0.0122404	0.0165494		0	0	0		0.0115204	0.0120524	0.0118671		0	0.023755	0.0190037		0.0164496	0.00986711	0.0198354		0.0219357	0.0188772	0.0174047		0.0422487	0.0377313	0.0387437		0.0200409	0.0304485		0	0	0.00286931		0.0337769	0.0393374	0.040867		0.0278657	0.0312565	0	0.014409
805.529		0	0	0		0	0	0		0	0	0		0	0	0		0	0	0		0	0	0		0	0	0		0	0	0		0	0		0	0	0		0	0	0		0	0	0	0
806.519		0.0133556	0.0120956	0.0114055		0.0184094	0.0196911	0.0251308		0	0	0		0.0243415	0.0263483	0.0198226		0.0164478	0.0224314	0.0383994		0.0244353	0.0234229	0.0207522		0	0.00317663	0.00251156		0.0265563	0.0234015	0.0296381		0.0086137	0.0166165		0.00594784	0.00868132	0.0137629		0.0302014	0.0322013	0.0427103		0.0170489	0.0231631	0.0355373	0.0112054
812.537		0	0	0		0	0	0		0	0	0		0	0.0131314	0		0	0	0		0.00702994	0.00445527	0		0	0	0		0.00643783	0.00277422	0.00562418		0.0125875	0.0239826		0	0	0		0	0	0		0.0131594	0.0122751	0	0
820.535		0	0	0		0	0	0		0.00681547	0	0		0	0	0		0.00868602	0	0.0089657		0	0	0		0	0	0		0	0	0		0	0		0	0	0		0	0.00317801	0.0078729		0	0	0	0.00857071
850.035		0	0	0		0	0	0		0.0229737	0.00596917	0.0162348		0	0	0		0	0	0		0	0	0		0.00135255	0	0		0	0	0		0.00335393	0		0	0	0		0	0	0		0	0	0	0.00530735
857.62		0	0.00455465	0		0	0	0		0.00592862	0	0		0	0	0		0	0	0		0	0	0		0	0.00355082	0		0	0	0		0	0		0.012665	0.0167237	0.00706785		0	0	0		0	0	0	0
858.033		0	0	0		0	0	0		0	0	0		0	0	0		0	0	0		0	0	0		0	0	0		0	0	0		0	0		0	0	0		0	0	0		0	0	0	0
864.051		0.00796668	0.00820222	0		0.0187998	0.0201377	0.0203132		0	0	0		0.0119103	0.013499	0.00711695		0.00886891	0.00931489	0.0107391		0	0	0		0	0	0		0	0	0		0.00418992	0.00803398		0	0	0		0	0	0		0	0	0.0211272	0.0435623
869.571		0	0	0		0	0	0		0	0	0		0	0	0		0	0	0		0	0	0		0.00125612	0.00330039	0		0	0	0		0	0.000705589		0	0	0		0	0	0		0	0	0	0
871.635		0.00560524	0	0		0	0	0		0	0	0		0	0	0		0	0.00251073	0		0	0	0		0	0	0		0.00255446	0.00295876	0.00674424		0	0.00231796		0	0	0		0.00988238	0	0.00273902		0.00156722	0.00353376	0	0
872.048		0	0	0		0.00889343	0.00987182	0.0090181		0	0	0		0.00715767	0.0119545	0		0	0.00452703	0.00609422		0	0	0		0	0	0		0	0	0		0	0.00228677		0	0	0		0	0	0		0	0	0	0.0162335
876.579		0	0	0		0	0	0		0	0	0		0	0	0		0	0	0		0	0	0		0	0	0		0	0	0		0	0		0	0	0.00544577		0	0	0		0	0.000403125	0	0
878.066		0	0	0		0	0	0		0	0	0		0	0	0		0	0	0		0	0	0		0	0	0		0	0	0		0	0		0	0	0		0	0	0		0	0	0	0
883.587		0.0278702	0.0267453	0.00913272		0.00187694	0	0		0.0466873	0.0511354	0.0342193		0.00648619	0.00303153	0		0	0.0047245	0.00280168		0.0191655	0.0177855	0.0226724		0.0523623	0.066738	0.0698534		0.00759483	0.00880656	0.00758348		0.0274116	0.0138913		0.0654355	0.0686093	0.071794		0	0	0.00258995		0.0165891	0.0145924	0	0
890.595		0.0121893	0.00803928	0		0	0	0		0	0	0		0	0.0022087	0		0	0	0		0.0061199	0.0066176	0.00448639		0.0106913	0.020206	0.0129564		0.00435918	0.00485202	0.00518865		0.0017737	0.00863105		0.0467515	0.0365207	0.0478872		0	0.00526911	0		0	0.00870994	0	0
897.602		0.210308	0.205493	0.259338		0.0657405	0.0613705	0.0694274		0.378602	0.387338	0.429789		0.0889148	0.093039	0.0919179		0.103677	0.0901859	0.0952438		0.165181	0.191121	0.189294		0.407375	0.48589	0.504672		0.12604	0.13188	0.143031		0.200011	0.119194		0.540005	0.532984	0.475646		0.0886924	0.0900052	0.0816687		0.134068	0.122557	0.0468511	0.0570193
904.61		0.0277322	0.0271928	0.0112202		0.00586341	0	0.00411192		0	0	0		0	0.00597044	0.00619817		0	0.00420198	0.00383279		0.0228219	0.0191023	0.0256003		0.00496461	0.0072895	0.00284212		0.0302323	0.0289774	0.026233		0.0038622	0.0248933		0.0109633	0.0181095	0.0123264		0.0176984	0.023538	0.025307		0.00372478	0.0317411	0	0.00793592
905.6		0	0	0		0.00690912	0	0.0032762		0	0	0		0.0172778	0.0133347	0		0	0.0137055	0.0132211		0.0218785	0.0191731	0.0118713		0	0	0		0	0	0		0.0168398	0.00643691		0	0	0		0	0.00607454	0.0104332		0	0	0	0
911.618		0.288103	0.287882	0.340707		0.33385	0.30419	0.344515		0.006005	0	0.00881194		0.284718	0.248478	0.300469		0.40028	0.297039	0.286517		0.375627	0.381735	0.38605		0.0175276	0.0233488	0.0163596		0.491375	0.480455	0.491075		0.160663	0.290672		0.0132652	0.00731121	0.0152819		0.528158	0.481457	0.431743		0.381959	0.430216	0.223036	0.171211
918.626		0	0.00353963	0		0	0	0		0	0	0		0	0	0		0	0	0		0.0020697	0.00247783	0		0	0	0		0.00721676	0.0033794	0.00195177		0	0.00453127		0	0	0		0	0	0.00158852		0	0.00960282	0	0
919.615		0	0	0		0.0506481	0.047731	0.0585837		0	0	0		0.0845492	0.0658187	0.0578258		0.0881127	0.0843752	0.0843536		0.0702125	0.071188	0.0542218		0	0	0		0	0	0		0.0194441	0.0253911		0	0	0		0.0512983	0.0740398	0.0634758		0	0.000644925	0	0
925.633		0	0	0		0	0	0		0	0	0		0	0	0		0	0	0		0.00234611	0	0		0.00141085	0	0		0	0	0.00333368		0.00989444	0.00263959		0	0	0		0	0	0		0.00189593	0.00432498	0	0
929.58		0	0	0		0.00229999	0	0		0	0	0		0	0	0		0	0	0		0	0	0		0	0	0		0	0	0		0	0		0	0	0		0	0	0		0	0	0	0
937.586		0	0	0		0	0	0		0	0	0		0	0	0		0	0	0		0	0	0		0.00487487	0.00360126	0		0	0	0		0.00561376	0		0	0	0		0	0	0		0.00281568	0	0	0
949.116		0.00580877	0.00407556	0		0	0	0		0.0227463	0.0146581	0.0209004		0	0	0		0	0	0		0	0	0		0	0.00202378	0		0	0	0		0.00527467	0.00105311		0	0.00519363	0		0	0	0		0	0	0	0.00504378
951.601		0	0	0		0	0	0		0	0	0		0	0	0		0	0	0		0.00460696	0.00249059	0		0	0	0		0	0	0		0.00145604	0		0	0	0		0	0	0		0.00937582	0.00323965	0	0
956.124		0.00715445	0.0055386	0		0	0	0		0	0	0.00809745		0	0	0		0	0	0		0.00158304	0	0		0	0	0		0	0	0		0	0.00405742		0	0	0		0	0	0		0	0	0	0
959.107		0	0	0		0	0	0		0	0	0		0	0	0		0	0	0		0	0	0		0.00394487	0	0		0	0	0		0.00285476	0		0	0	0		0	0	0		0	0	0	0
963.132		0.0705866	0.0707966	0.0647711		0.0416319	0.0501945	0.0299829		0.265255	0.217631	0.321905		0.0387029	0.0347502	0.0390058		0.0318826	0.0546648	0.0428672		0.0168456	0.0160991	0.0163798		0.0508017	0.0466128	0.0561112		0	0	0		0.0549515	0.023811		0.0509359	0.07012	0.0409114		0	0	0.0027131		0	0	0.120596	0.0848316
970.139		0.0181148	0.011774	0.0125403		0.00997255	0.0135945	0.00636325		0	0	0		0.00768401	0.00891771	0		0	0.00687489	0.00878787		0.00319385	0.00328735	0.00376825		0	0.00106463	0		0	0	0		0.00102633	0.0154698		0	0	0		0	0	0.00234156		0	0	0.0193405	0.0262848
971.129		0	0	0		0.00444287	0.00490852	0		0	0	0		0.00656759	0.0118423	0.0119984		0	0.0103587	0.00313517		0	0	0		0	0	0		0	0	0		0.00456414	0.000825922		0	0	0		0	0	0		0	0	0	0
973.122		0	0	0		0	0	0		0	0	0		0	0	0		0	0	0		0	0	0		0	0	0		0	0	0		0.00111046	0		0	0	0		0	0	0		0	0.000626289	0	0
977.147		0.103511	0.104746	0.136644		0.221929	0.274484	0.211238		0.00396173	0	0		0.183722	0.133863	0.197968		0.16524	0.142182	0.12929		0.0349047	0.0433072	0.0472919		0	0.00378986	0		0	0	0		0.0574589	0.0722299		0	0	0		0.0215949	0.0257407	0.0287293		0	0.00198833	0.332948	0.28519
984.155		0.00213451	0	0		0	0	0		0	0	0		0	0	0		0	0	0		0	0	0		0	0	0		0	0	0		0	0.00244485		0	0	0		0	0	0		0	0	0	0.00283274
985.145		0	0	0		0.0434513	0.0469055	0.0353974		0	0	0		0.0657823	0.073162	0.0935851		0.029121	0.0488149	0.0326615		0.00286522	0.00190347	0		0	0	0		0	0	0		0.00656189	0.00714822		0	0	0		0	0.00542557	0.00521239		0	0	0	0
1002.7		0	0	0		0	0	0		0	0	0		0	0	0		0	0	0		0	0	0		0.00485802	0.00838643	0.00417671		0	0	0		0.0016651	0.000733263		0	0	0		0	0	0		0	0.000902186	0	0
1009.71		0	0	0		0	0	0		0	0	0		0	0	0		0	0	0		0	0	0		0	0	0		0	0	0		0	0		0	0	0		0	0	0		0	0	0	0
1016.72		0.0154206	0.0177545	0		0	0	0		0.022452	0.00887222	0.012412		0	0.00789738	0		0	0	0		0.0146319	0.0223295	0.00845667		0.0489988	0.068557	0.0929232		0.00635806	0.00400218	0.00685781		0.0231061	0.0201217		0.0284555	0.0173674	0.0237636		0	0	0		0.0039623	0.0141909	0	0
1023.72		0	0	0		0	0	0		0	0	0		0	0	0		0	0	0		0	0	0		0	0	0		0	0	0		0	0.003108		0	0	0		0	0	0		0	0.0017239	0	0
1028.66		0.00278193	0	0		0	0	0		0.0468051	0.0235727	0.0446261		0	0.00246895	0		0	0.00773076	0.00560769		0	0	0		0	0	0		0	0	0		0	0		0	0	0		0	0	0		0	0	0.0247642	0.0071073
1030.73		0.020496	0.0221176	0		0.00537068	0.00423904	0.00748632		0	0	0		0.0264054	0.0297691	0.016978		0.0096386	0.012849	0.0042482		0.0328616	0.0378416	0.0359454		0	0.00135468	0		0.0410312	0.0349788	0.0312948		0.022393	0.0443161		0	0	0		0	0	0		0.0226343	0.0461334	0	0
1042.68		0.00537512	0.00531734	0		0.0192007	0.0189562	0.0122065		0	0	0		0.0132798	0.0144617	0.0122278		0	0.0190785	0.00958419		0	0	0		0	0	0		0	0	0		0	0		0	0	0		0	0	0		0	0	0.0766056	0.0426036
1068.23		0	0	0		0	0	0		0	0	0		0	0	0		0	0	0		0	0	0		0	0	0		0	0	0		0	0		0	0	0		0	0	0		0	0	0	0
1082.25		0	0.00286799	0		0	0	0		0	0	0		0	0	0		0	0	0		0	0	0		0.00302578	0.00456614	0.00601405		0	0	0		0.00355053	0.00286058		0	0	0		0	0	0		0	0	0	0
1096.26		0.0029751	0	0		0.00368408	0	0		0	0	0		0.0094212	0.00683085	0		0	0.00397328	0		0	0	0		0	0	0		0	0	0		0.00423938	0.0133384		0	0	0		0	0	0		0	0	0	0.0166244
1161.79		0	0	0		0	0	0		0	0	0		0	0	0		0	0	0		0	0	0		0	0	0		0	0	0		0	0		0	0	0		0	0	0		0	0	0	0
1359.82		0	0	0		0	0	0		0.0052053	0.0204663	0		0	0	0		0	0	0		0	0	0		0.0521015	0.0207321	0.0193411		0	0	0		0.0292195	0.00389402		0.00854216	0	0.0166226		0	0	0		0.0129004	0.00414335	0	0
1387.85		0.00369263	0.00371396	0		0.00298634	0	0.00606565		0	0	0		0	0.00815014	0		0	0.00742964	0.0122909		0.00843848	0.011439	0.00507566		0	0	0		0.0218752	0.0228846	0.0194837		0.0225854	0.0182711		0	0	0		0.0140764	0.0180539	0.0278086		0.0465903	0.0307731	0	0.0145342
1490.88		0	0	0		0	0	0		0	0	0		0	0	0		0	0	0		0	0	0		0	0	0		0	0	0		0	0		0	0	0		0	0	0		0	0	0	0
1518.91		0	0	0		0	0	0		0	0	0		0	0	0		0	0	0		0	0	0		0	0	0		0	0	0		0	0		0	0	0		0	0	0		0	0	0	0.0098706
1570.02		0	0	0		0	0	0		0	0	0		0	0	0		0	0	0		0	0	0		0.00263368	0.00212068	0		0	0	0		0.00120884	0		0	0	0		0	0	0		0	0.000918337	0	0
1598.05		0	0	0		0	0	0		0	0	0		0	0	0		0	0	0		0.000956542	0	0		0	0	0		0.00237766	0.00228331	0		0.0023617	0.00102649		0	0	0		0	0	0.00321547		0.00472671	0.00806998	0	0
1614.04		0	0	0		0	0	0		0	0	0		0	0	0		0	0	0		0	0	0		0	0	0		0	0	0		0	0		0	0	0		0	0	0		0	0.00199658	0	0
1626.08		0	0	0		0	0	0		0	0	0		0	0	0		0	0	0		0	0	0		0	0	0		0	0	0		0	0		0	0	0		0	0	0		0	0.000627062	0	0
1716.24		0	0.00397426	0		0	0	0		0.016422	0.0117666	0		0	0	0		0	0	0		0	0	0		0	0	0		0.00150868	0	0		0	0		0.0177137	0.0320021	0.00989911		0	0	0		0	0.000728732	0	0
1744.27		0.00338556	0.00832786	0.0163902		0.00909272	0.0147727	0.0072539		0	0	0		0.00787309	0.00707325	0		0	0	0.00774192		0.00159168	0	0		0	0	0		0.0137512	0.0102731	0.010585		0	0		0	0	0		0.0181026	0.0127114	0.0174563		0.00173596	0.0067716	0	0
1768.18		0	0	0		0	0	0		0	0	0		0	0	0		0	0	0		0	0	0		0.00219503	0.00131079	0		0	0	0		0.000823685	0		0	0	0		0	0	0		0	0	0	0
1796.21		0.00486156	0.0054378	0		0	0	0		0.00850336	0.010769	0		0	0	0		0	0	0		0.011348	0.00708251	0		0.0343955	0.0278446	0.0159191		0.00624345	0	0		0.0191344	0.00281376		0.0148508	0.0119991	0.026631		0	0	0.00263232		0.0126452	0.0131262	0	0
1810.22		0	0	0		0	0	0		0	0	0		0	0	0		0	0	0		0	0	0		0	0	0		0	0	0		0	0		0	0	0		0	0	0		0	0.00349339	0	0
1824.24		0.0077012	0.0172925	0		0.014305	0.0109323	0.0189736		0	0	0		0	0.0137653	0		0.0147665	0.00512256	0.0133391		0.0269603	0.0212703	0.00894591		0	0	0		0.0295686	0.0272034	0.0262911		0.0133812	0.0101131		0	0	0		0.0102186	0.0244787	0.0307872		0.0374998	0.0462314	0	0
1927.26		0	0	0		0	0	0		0	0	0		0	0	0		0	0	0		0	0	0		0	0	0		0	0	0		0.000989635	0		0	0	0		0	0	0		0	0	0	0
1955.29		0	0	0		0.00183693	0.00370159	0		0	0	0		0	0	0		0	0	0		0	0	0		0	0	0		0	0	0		0.00140633	0		0	0	0		0	0	0		0	0	0	0
Ratio of lipid A species [%]
0 Ara		75.8915	77.9884	76.8146		59.1226	51.6945	63.5641		60.437	69.9758	55.7892		62.2017	64.9957	60.1791		74.5407	66.0983	71.2389		93.8406	93.5403	93.256		93.8537	93.8862	93.5726		100	100	100		83.8862	83.4932		94.9064	92.4686	95.6167		97.8405	96.8834	95.6654		100	99.7385	35.8928	36.673
1 P-EtN		0	0	0		0	0	0		0	0	0		0	0	0		0	0	0		0	0	0		0.394487	0	0		0	0	0		0.396522	0		0	0	0		0	0	0		0	0.0626289	0	0
1 Ara		23.2928	21.4799	23.1854		38.7273	46.4098	35.2152		34.8825	27.667	39.7482		36.4704	33.3112	38.5982		25.4593	31.2208	27.2419		6.15937	6.45971	6.74399		5.7518	6.11377	6.42742		0	0	0		15.7172	16.5068		5.09359	7.53136	4.3833		2.15949	3.11662	4.33459		0	0.198833	53.9702	58.3559
2 Ara		0.815705	0.531734	0		2.15007	1.89562	1.22065		4.68051	2.35727	4.46261		1.32798	1.69307	1.22278		0	2.68092	1.51919		0	0	0		0	0	0		0	0	0		0	0		0	0	0		0	0	0		0	0	10.137	4.97109
Check		100	100	100		100	100	100		100	100	100		100	100	100		100	100	100		100	100	100		100	100	100		100	100	100		100	100		100	100	100		100	100	100		100	100	100	100
Ratio of lipid A species [%]
0 Ara (incl. 1 P-EtN)		75.8915	77.9884	76.8146		59.1226	51.6945	63.5641		60.437	69.9758	55.7892		62.2017	64.9957	60.1791		74.5407	66.0983	71.2389		93.8406	93.5403	93.256		94.2482	93.8862	93.5726		100	100	100		84.2828	83.4932		94.9064	92.4686	95.6167		97.8405	96.8834	95.6654		100	99.8012	35.8928	36.673
1 Ara		23.2928	21.4799	23.1854		38.7273	46.4098	35.2152		34.8825	27.667	39.7482		36.4704	33.3112	38.5982		25.4593	31.2208	27.2419		6.15937	6.45971	6.74399		5.7518	6.11377	6.42742		0	0	0		15.7172	16.5068		5.09359	7.53136	4.3833		2.15949	3.11662	4.33459		0	0.198833	53.9702	58.3559
2 Ara		0.815705	0.531734	0		2.15007	1.89562	1.22065		4.68051	2.35727	4.46261		1.32798	1.69307	1.22278		0	2.68092	1.51919		0	0	0		0	0	0		0	0	0		0	0		0	0	0		0	0	0		0	0	10.137	4.97109
Strain			E. asburiae BK5433				E. bugandensis RBG-17-0246-1				E. cancerogenous RPK-18-0479-1				E. chengduensis RBK-18-0141-1				E. cloacae RPK-18-0157-1				E. kobei BK6664				E. ludwigii F8789				E. wuhouensis F00728				E. roggenkampii RPB-17-0516-2			E. mori RBL-17-0354-2				E. vonholyi F-147					E. xiangfangensis BK4615
Colistin concentration			0 mg/L				0 mg/L				0 mg/L				0 mg/L				0 mg/L				0 mg/L				0 mg/L				0 mg/L				0 mg/L			0 mg/L				0 mg/L				0 mg/L		2 mg/L
Average ratio
0 Ara			76.8982				58.1271				62.0673				62.4588				70.626				93.5456				93.9023				100				83.888			94.3306				96.7964				99.9006		36.2829
1 Ara			22.6527				40.1175				34.0992				36.1266				27.974				6.45436				6.09766				0				16.112			5.66942				3.20357				0.0994163		56.1631
2 Ara			0.449146				1.75544				3.83346				1.41461				1.40004				0				0				0				0			0				0				0		7.55404
SD
0 Ara			0.858091				4.8966				5.90527				1.97478				3.47377				0.2387				0.276055				1.64093e-14				0.394759			1.34815				0.890107				0.0994163		0.390084
1 Ara			0.83046				4.6747				4.96316				2.17202				2.40843				0.2387				0.276055				0				0.394759			1.34815				0.890107				0.0994163		2.19286
2 Ara			0.338092				0.392167				1.04761				0.201528				1.09772				0				0				0				0			0				0				0		2.58295
[truncated: 88 more columns]
