# Supplementary material for: Resolving colistin resistance and heteroresistance in Enterobacter species
Source: Research Square preprint supplement (doi:10.21203/rs.3.rs-1894580/v1), 2022-08-03
Supplement: Supplementary file 3 [file 8c592e56bf741b3d5af90807.xlsx]

## Sheet: assemblies
BioSampleAccn	isolation_source	host	host_disease	host_age	collected_by	serovar	AssemblyAccession	AssemblyName	AssemblyStatus	Isolate	strain(Sub_value)	WGS	total_length	contig_count	contig_n50	Taxid	Organism	SpeciesName	FtpPath_RefSeq	FtpPath_GenBank	SubmitterOrganization	SubmissionDate	AsmReleaseDate_GenBank	Date_GenBank	LastUpdateDate	BioSampleAccn	type	Enterobacter_spp	OGRI_based_species_(ANI>95%)	lineage	MLST	Type_strain	plasmid_replicon	mcr-9	mcr-10	Carbapenemases	arnBCADTEF
SAMN08020353	metagenome						GCA_003534165.1	ASM353416v1	Scaffold	UBA11899		DPEL01	4173195	232	40521	61645	Enterobacter_asburiae_(enterobacteria)	Enterobacter_asburiae	NA	ftp://ftp.ncbi.nlm.nih.gov/genomes/all/GCA/003/534/165/GCA_003534165.1_ASM353416v1	University_of_Queensland	2018/09/10_00:00	2018/09/10_00:00	2018/09/10_00:00	2018/09/10_00:00	SAMN08020353	assembly	Enterobacter_spp	E_asburiae	#N/A	-		NA	absent	absent	-	present
SAMEA3859023	human_gut						GCF_900021175.1	Enterobacter_timonensis	Contig	NA	mt20	FCOP01	4199690	13	931139	1755099	Enterobacter_timonensis_(enterobacteria)	Enterobacter_timonensis	ftp://ftp.ncbi.nlm.nih.gov/genomes/all/GCF/900/021/175/GCF_900021175.1_Enterobacter_timonensis	ftp://ftp.ncbi.nlm.nih.gov/genomes/all/GCA/900/021/175/GCA_900021175.1_Enterobacter_timonensis	URMITE	2016/01/29_00:00	2016/03/11_00:00	2016/03/11_00:00	2016/03/15_00:00	SAMEA3859023	assembly	Enterobacter_spp	E_timonensis	#N/A	-	yes	NA	absent	absent	-	absent
SAMN03777446	soil						GCF_001270135.1	ASM127013v1	Scaffold	NA	B2-DHA	LFJA01	4219003	42	193663	158836	Enterobacter_hormaechei_(enterobacteria)	Enterobacter_hormaechei	ftp://ftp.ncbi.nlm.nih.gov/genomes/all/GCF/001/270/135/GCF_001270135.1_ASM127013v1	ftp://ftp.ncbi.nlm.nih.gov/genomes/all/GCA/001/270/135/GCA_001270135.1_ASM127013v1	University_of_Skovde	2015/08/18_00:00	2015/08/18_00:00	2015/08/18_00:00	2019/01/07_00:00	SAMN03777446	assembly	Enterobacter_spp	E_xiangfangensis	1	-		NA	absent	absent	-	present
SAMN06455590	metal						GCA_002454795.1	ASM245479v1	Scaffold	UBA6690		DKJO01	4236916	169	54345	550	Enterobacter_cloacae_(enterobacteria)	Enterobacter_cloacae	NA	ftp://ftp.ncbi.nlm.nih.gov/genomes/all/GCA/002/454/795/GCA_002454795.1_ASM245479v1	University_of_Queensland	2017/10/05_00:00	2017/10/05_00:00	2017/10/05_00:00	2017/10/05_00:00	SAMN06455590	assembly	Enterobacter_spp	E_asburiae	#N/A	-		NA	absent	absent	-	present
SAMN06452035	plastic						GCA_002340485.1	ASM234048v1	Scaffold	UBA2555		DDMD01	4245928	79	75573	550	Enterobacter_cloacae_(enterobacteria)	Enterobacter_cloacae	NA	ftp://ftp.ncbi.nlm.nih.gov/genomes/all/GCA/002/340/485/GCA_002340485.1_ASM234048v1	University_of_Queensland	2017/09/22_00:00	2017/09/22_00:00	2017/09/22_00:00	2017/09/22_00:00	SAMN06452035	assembly	Enterobacter_spp	E_asburiae	#N/A	-		NA	absent	absent	-	present
SAMN06454615	wood						GCA_002500335.1	ASM250033v1	Scaffold	UBA7839		DLTJ01	4289322	466	15341	158836	Enterobacter_hormaechei_(enterobacteria)	Enterobacter_hormaechei	NA	ftp://ftp.ncbi.nlm.nih.gov/genomes/all/GCA/002/500/335/GCA_002500335.1_ASM250033v1	University_of_Queensland	2017/10/10_00:00	2017/10/10_00:00	2017/10/10_00:00	2017/10/10_00:00	SAMN06454615	assembly	Enterobacter_spp	E_xiangfangensis	1	-		pENTAS02	absent	absent	-	present
SAMN06455364	metal/plastic						GCA_002500445.1	ASM250044v1	Scaffold	UBA7898		DLRC01	4325198	39	176355	158836	Enterobacter_hormaechei_(enterobacteria)	Enterobacter_hormaechei	NA	ftp://ftp.ncbi.nlm.nih.gov/genomes/all/GCA/002/500/445/GCA_002500445.1_ASM250044v1	University_of_Queensland	2017/10/10_00:00	2017/10/10_00:00	2017/10/10_00:00	2017/10/10_00:00	SAMN06455364	assembly	Enterobacter_spp	E_xiangfangensis	3	-		NA	absent	absent	-	absent
SAMN06453431	metal						GCA_002421125.1	ASM242112v1	Scaffold	UBA5648		DIJI01	4332058	110	71582	158836	Enterobacter_hormaechei_(enterobacteria)	Enterobacter_hormaechei	NA	ftp://ftp.ncbi.nlm.nih.gov/genomes/all/GCA/002/421/125/GCA_002421125.1_ASM242112v1	University_of_Queensland	2017/10/03_00:00	2017/10/04_00:00	2017/10/04_00:00	2017/10/04_00:00	SAMN06453431	assembly	Enterobacter_spp	E_xiangfangensis	1	-		NA	absent	absent	-	present
SAMN06453889	metal/plastic						GCA_002392015.1	ASM239201v1	Scaffold	UBA3883		DGGD01	4340241	277	26867	550	Enterobacter_cloacae_(enterobacteria)	Enterobacter_cloacae	NA	ftp://ftp.ncbi.nlm.nih.gov/genomes/all/GCA/002/392/015/GCA_002392015.1_ASM239201v1	University_of_Queensland	2017/09/28_00:00	2017/09/28_00:00	2017/09/28_00:00	2017/09/28_00:00	SAMN06453889	assembly	Enterobacter_spp	E_asburiae	#N/A	-		NA	absent	absent	-	present
SAMN06456045	wood						GCA_002403775.1	ASM240377v1	Scaffold	UBA4748		DHIK01	4346729	98	77684	158836	Enterobacter_hormaechei_(enterobacteria)	Enterobacter_hormaechei	NA	ftp://ftp.ncbi.nlm.nih.gov/genomes/all/GCA/002/403/775/GCA_002403775.1_ASM240377v1	University_of_Queensland	2017/09/28_00:00	2017/09/29_00:00	2017/09/29_00:00	2017/09/29_00:00	SAMN06456045	assembly	Enterobacter_spp	E_xiangfangensis	3	-		NA	absent	absent	-	absent
SAMN06452741	wood						GCA_002414015.1	ASM241401v1	Scaffold	UBA5135		DHYH01	4418293	82	92526	158836	Enterobacter_hormaechei_(enterobacteria)	Enterobacter_hormaechei	NA	ftp://ftp.ncbi.nlm.nih.gov/genomes/all/GCA/002/414/015/GCA_002414015.1_ASM241401v1	University_of_Queensland	2017/10/03_00:00	2017/10/03_00:00	2017/10/03_00:00	2017/10/03_00:00	SAMN06452741	assembly	Enterobacter_spp	E_xiangfangensis	1	-		NA	absent	absent	-	present
SAMN06453471	wood						GCA_002378045.1	ASM237804v1	Scaffold	UBA3474		DFRB01	4420718	36	179684	158836	Enterobacter_hormaechei_(enterobacteria)	Enterobacter_hormaechei	NA	ftp://ftp.ncbi.nlm.nih.gov/genomes/all/GCA/002/378/045/GCA_002378045.1_ASM237804v1	University_of_Queensland	2017/09/27_00:00	2017/09/27_00:00	2017/09/27_00:00	2017/09/27_00:00	SAMN06453471	assembly	Enterobacter_spp	E_xiangfangensis	3	-		NA	absent	absent	-	absent
SAMN03495967		Homo_sapiens			Vance_Fowler		GCF_001011855.1	ASM101185v1	Contig	NA	GN02073	LDCE01	4423267	36	483665	61645	Enterobacter_asburiae_(enterobacteria)	Enterobacter_asburiae	ftp://ftp.ncbi.nlm.nih.gov/genomes/all/GCF/001/011/855/GCF_001011855.1_ASM101185v1	ftp://ftp.ncbi.nlm.nih.gov/genomes/all/GCA/001/011/855/GCA_001011855.1_ASM101185v1	JCVI	2015/05/21_00:00	2015/05/21_00:00	2015/05/21_00:00	2015/05/26_00:00	SAMN03495967	assembly	Enterobacter_spp	E_asburiae	#N/A	685		NA	absent	absent	-	present
SAMN06451894	metal						GCA_002390885.1	ASM239088v1	Scaffold	UBA4405		DGQV01	4423763	89	95189	158836	Enterobacter_hormaechei_(enterobacteria)	Enterobacter_hormaechei	NA	ftp://ftp.ncbi.nlm.nih.gov/genomes/all/GCA/002/390/885/GCA_002390885.1_ASM239088v1	University_of_Queensland	2017/09/28_00:00	2017/09/28_00:00	2017/09/28_00:00	2017/09/28_00:00	SAMN06451894	assembly	Enterobacter_spp	E_xiangfangensis	1	-		NA	absent	absent	-	present
SAMN03159368							GCF_900102705.1	IMG-taxon_2602042066_annotated_assembly	Scaffold	NA	NFIX45	FMVY01	4423871	20	343550	1566252	Enterobacter_sp._NFIX45_(enterobacteria)	Enterobacter_sp._NFIX45	ftp://ftp.ncbi.nlm.nih.gov/genomes/all/GCF/900/102/705/GCF_900102705.1_IMG-taxon_2602042066_annotated_assembly	ftp://ftp.ncbi.nlm.nih.gov/genomes/all/GCA/900/102/705/GCA_900102705.1_IMG-taxon_2602042066_annotated_assembly	DOE_-_JOINT_GENOME_INSTITUTE	2016/10/17_00:00	2016/10/27_00:00	2016/10/27_00:00	2017/07/29_00:00	SAMN03159368	assembly	Enterobacter_spp	E_xiangfangensis	4	-		NA	absent	absent	-	absent
SAMN03732687	bodily_fluid	Homo_sapiens			Vance_Fowler		GCF_001023015.1	ASM102301v1	Contig	NA	GN04222	LECX01	4424073	32	483950	61645	Enterobacter_asburiae_(enterobacteria)	Enterobacter_asburiae	ftp://ftp.ncbi.nlm.nih.gov/genomes/all/GCF/001/023/015/GCF_001023015.1_ASM102301v1	ftp://ftp.ncbi.nlm.nih.gov/genomes/all/GCA/001/023/015/GCA_001023015.1_ASM102301v1	JCVI	2015/06/09_00:00	2015/06/09_00:00	2015/06/09_00:00	2015/06/18_00:00	SAMN03732687	assembly	Enterobacter_spp	E_asburiae	#N/A	685		NA	absent	absent	-	present
SAMN04494563	stool	Homo_sapiens					GCF_001643165.1	ASM164316v1	Scaffold	NA	RDT3	LSTS01	4425001	24	320621	1296536	Enterobacter_hormaechei_subsp._xiangfangensis_(enterobacteria)	Enterobacter_hormaechei	ftp://ftp.ncbi.nlm.nih.gov/genomes/all/GCF/001/643/165/GCF_001643165.1_ASM164316v1	ftp://ftp.ncbi.nlm.nih.gov/genomes/all/GCA/001/643/165/GCA_001643165.1_ASM164316v1	Institute_of_Microbial_Technology	2016/05/13_00:00	2016/05/13_00:00	2016/05/13_00:00	2016/05/17_00:00	SAMN04494563	assembly	Enterobacter_spp	E_xiangfangensis	3	331		NA	absent	absent	-	absent
SAMN06454560	wood						GCA_002354265.1	ASM235426v1	Scaffold	UBA2702		DELG01	4438124	28	298793	158836	Enterobacter_hormaechei_(enterobacteria)	Enterobacter_hormaechei	NA	ftp://ftp.ncbi.nlm.nih.gov/genomes/all/GCA/002/354/265/GCA_002354265.1_ASM235426v1	University_of_Queensland	2017/09/25_00:00	2017/09/25_00:00	2017/09/25_00:00	2017/09/25_00:00	SAMN06454560	assembly	Enterobacter_spp	E_xiangfangensis	3	-		NA	absent	absent	-	absent
SAMN05212257		buffalo					GCF_001662855.1	ASM166285v1	Contig	NA	ND22	LZEN01	4439389	36	233201	550	Enterobacter_cloacae_(enterobacteria)	Enterobacter_cloacae	ftp://ftp.ncbi.nlm.nih.gov/genomes/all/GCF/001/662/855/GCF_001662855.1_ASM166285v1	ftp://ftp.ncbi.nlm.nih.gov/genomes/all/GCA/001/662/855/GCA_001662855.1_ASM166285v1	CSIR-_National_Environmental_Engineering_Research_Institute	2016/06/14_00:00	2016/06/15_00:00	2016/06/15_00:00	2016/06/21_00:00	SAMN05212257	assembly	Enterobacter_spp	E_wuhouensis	#N/A	-		NA	absent	absent	-	absent
SAMN06450651	metal						GCA_002425575.1	ASM242557v1	Scaffold	UBA5565		DIMN01	4443046	106	81203	158836	Enterobacter_hormaechei_(enterobacteria)	Enterobacter_hormaechei	NA	ftp://ftp.ncbi.nlm.nih.gov/genomes/all/GCA/002/425/575/GCA_002425575.1_ASM242557v1	University_of_Queensland	2017/10/04_00:00	2017/10/04_00:00	2017/10/04_00:00	2017/10/04_00:00	SAMN06450651	assembly	Enterobacter_spp	E_xiangfangensis	2	-		NA	present	absent	-	absent
SAMN08019365	metagenome						GCA_003512405.1	ASM351240v1	Scaffold	UBA8264		DOQW01	4443655	31	235201	61645	Enterobacter_asburiae_(enterobacteria)	Enterobacter_asburiae	NA	ftp://ftp.ncbi.nlm.nih.gov/genomes/all/GCA/003/512/405/GCA_003512405.1_ASM351240v1	University_of_Queensland	2018/09/07_00:00	2018/09/07_00:00	2018/09/07_00:00	2018/09/07_00:00	SAMN08019365	assembly	Enterobacter_spp	E_asburiae	#N/A	-		NA	absent	absent	-	present
SAMN06451422	metal						GCA_002321065.1	ASM232106v1	Scaffold	UBA1647		DCLN01	4449093	99	112692	158836	Enterobacter_hormaechei_(enterobacteria)	Enterobacter_hormaechei	NA	ftp://ftp.ncbi.nlm.nih.gov/genomes/all/GCA/002/321/065/GCA_002321065.1_ASM232106v1	University_of_Queensland	2017/09/21_00:00	2017/09/21_00:00	2017/09/21_00:00	2017/09/21_00:00	SAMN06451422	assembly	Enterobacter_spp	E_xiangfangensis	3	-		NA	absent	absent	-	absent
SAMN09845182		Homo_sapiens					GCF_003964695.1	ASM396469v1	Contig	NA	WCHEH090004	RXQO01	4449711	42	302603	158836	Enterobacter_hormaechei_(enterobacteria)	Enterobacter_hormaechei	ftp://ftp.ncbi.nlm.nih.gov/genomes/all/GCF/003/964/695/GCF_003964695.1_ASM396469v1	ftp://ftp.ncbi.nlm.nih.gov/genomes/all/GCA/003/964/695/GCA_003964695.1_ASM396469v1	West_China_Hospital,_Sichuan_University	2018/12/23_00:00	2018/12/23_00:00	2018/12/23_00:00	2018/12/28_00:00	SAMN09845182	assembly	Enterobacter_spp	E_xiangfangensis	3	1160		NA	absent	absent	-	absent
SAMN03197454	missing	Homo_sapiens	missing		UW_clinical_laboratory		GCF_001056175.1	ASM105617v1	Scaffold	NA	261_ECLO	JVNW01	4450004	212	40016	1812934	Enterobacter_hormaechei_subsp._hoffmannii_(enterobacteria)	Enterobacter_hormaechei	ftp://ftp.ncbi.nlm.nih.gov/genomes/all/GCF/001/056/175/GCF_001056175.1_ASM105617v1	ftp://ftp.ncbi.nlm.nih.gov/genomes/all/GCA/001/056/175/GCA_001056175.1_ASM105617v1	University_of_Washington	2015/07/10_00:00	2015/07/10_00:00	2015/07/10_00:00	2016/07/19_00:00	SAMN03197454	assembly	Enterobacter_spp	E_xiangfangensis	2	665		NA	absent	absent	-	absent
SAMN06457436	metal						GCA_002367845.1	ASM236784v1	Scaffold	UBA3024		DFDQ01	4473875	111	71026	550	Enterobacter_cloacae_(enterobacteria)	Enterobacter_cloacae	NA	ftp://ftp.ncbi.nlm.nih.gov/genomes/all/GCA/002/367/845/GCA_002367845.1_ASM236784v1	University_of_Queensland	2017/09/26_00:00	2017/09/26_00:00	2017/09/26_00:00	2017/09/26_00:00	SAMN06457436	assembly	Enterobacter_spp	E_asburiae	#N/A	-		pENTAS02	absent	absent	-	present
SAMN09074863	missing	not_applicable					GCF_003384785.1	ASM338478v1	Contig	NA	colR/S_10_4	QTTI01	4487733	10	2614999	550	Enterobacter_cloacae_(enterobacteria)	Enterobacter_cloacae	ftp://ftp.ncbi.nlm.nih.gov/genomes/all/GCF/003/384/785/GCF_003384785.1_ASM338478v1	ftp://ftp.ncbi.nlm.nih.gov/genomes/all/GCA/003/384/785/GCA_003384785.1_ASM338478v1	DOE_Joint_Genome_Institute	2018/08/14_00:00	2018/08/14_00:00	2018/08/14_00:00	2018/08/16_00:00	SAMN09074863	assembly	Enterobacter_spp	E_vonholyi	#N/A	-		NA	absent	absent	-	present
SAMN06454769	metal						GCA_002321105.1	ASM232110v1	Scaffold	UBA1645		DCLP01	4491849	42	151625	158836	Enterobacter_hormaechei_(enterobacteria)	Enterobacter_hormaechei	NA	ftp://ftp.ncbi.nlm.nih.gov/genomes/all/GCA/002/321/105/GCA_002321105.1_ASM232110v1	University_of_Queensland	2017/09/21_00:00	2017/09/21_00:00	2017/09/21_00:00	2017/09/21_00:00	SAMN06454769	assembly	Enterobacter_spp	E_xiangfangensis	3	148		NA	absent	absent	-	absent
SAMEA104353277							GCF_900232975.1	enter-horma1-M	Contig	Enter_horma1_M		OETD01	4497631	78	107312	158836	Enterobacter_hormaechei_(enterobacteria)	Enterobacter_hormaechei	ftp://ftp.ncbi.nlm.nih.gov/genomes/all/GCF/900/232/975/GCF_900232975.1_enter-horma1-M	ftp://ftp.ncbi.nlm.nih.gov/genomes/all/GCA/900/232/975/GCA_900232975.1_enter-horma1-M	Faculty_of_medecine_and_pharmacy_RABAT	2018/01/02_00:00	2018/02/08_00:00	2018/02/08_00:00	2018/02/10_00:00	SAMEA104353277	assembly	Enterobacter_spp	E_xiangfangensis	3	511		NA	absent	absent	-	absent
SAMN02471838	lettuce_leaf						GCF_000498635.1	L1	Contig	NA	L1	AWXI01	4498316	195	37421	1421338	Enterobacter_asburiae_L1_(enterobacteria)	Enterobacter_asburiae	ftp://ftp.ncbi.nlm.nih.gov/genomes/all/GCF/000/498/635/GCF_000498635.1_L1	ftp://ftp.ncbi.nlm.nih.gov/genomes/all/GCA/000/498/635/GCA_000498635.1_L1	UNIVERSITY_OF_MALAYA	2013/11/22_00:00	2013/11/22_00:00	2013/11/22_00:00	2014/10/09_00:00	SAMN02471838	assembly	Enterobacter_spp	E_asburiae	#N/A	720		pJARS36	absent	absent	-	present
SAMEA2273497	blood	Homo_sapiens					GCF_900075395.1	12082_4#62	Scaffold	NA	e1202	FJWC01	4499414	41	219011	550	Enterobacter_cloacae_(enterobacteria)	Enterobacter_cloacae	ftp://ftp.ncbi.nlm.nih.gov/genomes/all/GCF/900/075/395/GCF_900075395.1_12082_4_62	ftp://ftp.ncbi.nlm.nih.gov/genomes/all/GCA/900/075/395/GCA_900075395.1_12082_4_62	SC	2016/04/04_00:00	2016/04/06_00:00	2016/04/06_00:00	2016/04/12_00:00	SAMEA2273497	assembly	Enterobacter_spp	E_xiangfangensis	2	787		NA	absent	absent	-	absent
SAMN03197073	missing	Homo_sapiens	missing		UW_clinical_laboratory		GCF_001052135.1	ASM105213v1	Scaffold	NA	1119_ECLO	JWCN01	4500218	123	92927	61645	Enterobacter_asburiae_(enterobacteria)	Enterobacter_asburiae	ftp://ftp.ncbi.nlm.nih.gov/genomes/all/GCF/001/052/135/GCF_001052135.1_ASM105213v1	ftp://ftp.ncbi.nlm.nih.gov/genomes/all/GCA/001/052/135/GCA_001052135.1_ASM105213v1	University_of_Washington	2015/07/10_00:00	2015/07/10_00:00	2015/07/10_00:00	2016/07/19_00:00	SAMN03197073	assembly	Enterobacter_spp	E_asburiae	#N/A	657		NA	present	absent	-	present
SAMN01001254							GCF_000264705.1	EntClo_1.0	Contig	NA	GS1	AJXP01	4500707	48	267465	1177927	Enterobacter_cloacae_subsp._cloacae_GS1_(enterobacteria)	Enterobacter_cloacae	ftp://ftp.ncbi.nlm.nih.gov/genomes/all/GCF/000/264/705/GCF_000264705.1_EntClo_1.0	ftp://ftp.ncbi.nlm.nih.gov/genomes/all/GCA/000/264/705/GCA_000264705.1_EntClo_1.0	Madurai_Kamaraj_University	2012/05/30_00:00	2012/05/30_00:00	2012/05/30_00:00	2015/03/23_00:00	SAMN01001254	assembly	Enterobacter_spp	E_xiangfangensis	3	-		NA	absent	absent	-	absent
SAMEA3312983							GCF_001375695.1	PRJEB8964_assembly_1	Contig	NA	Marseille	CTRQ01	4501383	18	382552	550	Enterobacter_cloacae_(enterobacteria)	Enterobacter_cloacae	ftp://ftp.ncbi.nlm.nih.gov/genomes/all/GCF/001/375/695/GCF_001375695.1_PRJEB8964_assembly_1	ftp://ftp.ncbi.nlm.nih.gov/genomes/all/GCA/001/375/695/GCA_001375695.1_PRJEB8964_assembly_1	URMITE	2015/04/20_00:00	2015/10/17_00:00	2015/10/17_00:00	2016/12/16_00:00	SAMEA3312983	assembly	Enterobacter_spp	E_xiangfangensis	3	1160		NA	absent	absent	-	absent
SAMN03197138	missing	Homo_sapiens	missing		UW_clinical_laboratory		GCF_001052355.1	ASM105235v1	Scaffold	NA	1180_ECLO	JWAA01	4501423	103	119765	61645	Enterobacter_asburiae_(enterobacteria)	Enterobacter_asburiae	ftp://ftp.ncbi.nlm.nih.gov/genomes/all/GCF/001/052/355/GCF_001052355.1_ASM105235v1	ftp://ftp.ncbi.nlm.nih.gov/genomes/all/GCA/001/052/355/GCA_001052355.1_ASM105235v1	University_of_Washington	2015/07/10_00:00	2015/07/10_00:00	2015/07/10_00:00	2016/07/19_00:00	SAMN03197138	assembly	Enterobacter_spp	E_asburiae	#N/A	657		NA	absent	absent	-	present
SAMN06451124	wood						GCA_002455675.1	ASM245567v1	Scaffold	UBA6646		DKLG01	4503540	152	57926	158836	Enterobacter_hormaechei_(enterobacteria)	Enterobacter_hormaechei	NA	ftp://ftp.ncbi.nlm.nih.gov/genomes/all/GCA/002/455/675/GCA_002455675.1_ASM245567v1	University_of_Queensland	2017/10/05_00:00	2017/10/05_00:00	2017/10/05_00:00	2017/10/05_00:00	SAMN06451124	assembly	Enterobacter_spp	E_xiangfangensis	3	-		NA	present	absent	-	absent
SAMN07571741	urine	Homo_sapiens	urinary_track_infection	17_months	Centre_Hospitalier_Sylvanus_Olympio		GCF_002740575.1	ASM274057v1	Contig	NA	768	NSJG01	4510731	145	119212	158836	Enterobacter_hormaechei_(enterobacteria)	Enterobacter_hormaechei	ftp://ftp.ncbi.nlm.nih.gov/genomes/all/GCF/002/740/575/GCF_002740575.1_ASM274057v1	ftp://ftp.ncbi.nlm.nih.gov/genomes/all/GCA/002/740/575/GCA_002740575.1_ASM274057v1	Universite_de_Lome	2017/10/31_00:00	2017/10/31_00:00	2017/10/31_00:00	2019/01/07_00:00	SAMN07571741	assembly	Enterobacter_spp	E_xiangfangensis	3	266		NA	absent	absent	-	absent
SAMN08027251		Homo_sapiens					GCF_003985235.1	ASM398523v1	Contig	NA	WCHEA045006	RXPL01	4512178	34	430678	61645	Enterobacter_asburiae_(enterobacteria)	Enterobacter_asburiae	ftp://ftp.ncbi.nlm.nih.gov/genomes/all/GCF/003/985/235/GCF_003985235.1_ASM398523v1	ftp://ftp.ncbi.nlm.nih.gov/genomes/all/GCA/003/985/235/GCA_003985235.1_ASM398523v1	West_China_Hospital,_Sichuan_University	2018/12/28_00:00	2018/12/28_00:00	2018/12/28_00:00	2019/01/02_00:00	SAMN08027251	assembly	Enterobacter_spp	E_asburiae	#N/A	733		NA	absent	absent	-	present
SAMN03283643	Unknown	Unknown	Unknown		Barry_Kreiswirth		GCF_000958405.1	ASM95840v1	Contig	NA	36796	JZYQ01	4514087	58	130304	1812934	Enterobacter_hormaechei_subsp._hoffmannii_(enterobacteria)	Enterobacter_hormaechei	ftp://ftp.ncbi.nlm.nih.gov/genomes/all/GCF/000/958/405/GCF_000958405.1_ASM95840v1	ftp://ftp.ncbi.nlm.nih.gov/genomes/all/GCA/000/958/405/GCA_000958405.1_ASM95840v1	JCVI	2015/03/19_00:00	2015/03/19_00:00	2015/03/19_00:00	2016/07/14_00:00	SAMN03283643	assembly	Enterobacter_spp	E_xiangfangensis	2	602		NA	absent	absent	-	absent
SAMN06451892	metal						GCA_002389795.1	ASM238979v1	Scaffold	UBA4403		DGQX01	4515467	75	100771	158836	Enterobacter_hormaechei_(enterobacteria)	Enterobacter_hormaechei	NA	ftp://ftp.ncbi.nlm.nih.gov/genomes/all/GCA/002/389/795/GCA_002389795.1_ASM238979v1	University_of_Queensland	2017/09/28_00:00	2017/09/28_00:00	2017/09/28_00:00	2017/09/28_00:00	SAMN06451892	assembly	Enterobacter_spp	E_xiangfangensis	3	-		NA	absent	absent	-	absent
SAMN06453850	metal						GCA_002410355.1	ASM241035v1	Scaffold	UBA5304		DHRU01	4517264	69	129936	550	Enterobacter_cloacae_(enterobacteria)	Enterobacter_cloacae	NA	ftp://ftp.ncbi.nlm.nih.gov/genomes/all/GCA/002/410/355/GCA_002410355.1_ASM241035v1	University_of_Queensland	2017/10/03_00:00	2017/10/03_00:00	2017/10/03_00:00	2017/10/03_00:00	SAMN06453850	assembly	Enterobacter_spp	E_asburiae	#N/A	-		NA	absent	absent	-	present
SAMN06453915	metal						GCA_002361045.1	ASM236104v1	Scaffold	UBA3335		DERR01	4517691	34	246537	158836	Enterobacter_hormaechei_(enterobacteria)	Enterobacter_hormaechei	NA	ftp://ftp.ncbi.nlm.nih.gov/genomes/all/GCA/002/361/045/GCA_002361045.1_ASM236104v1	University_of_Queensland	2017/09/26_00:00	2017/09/26_00:00	2017/09/26_00:00	2017/09/26_00:00	SAMN06453915	assembly	Enterobacter_spp	E_xiangfangensis	4	61		NA	absent	absent	-	absent
SAMN06455538	metal						GCA_002377275.1	ASM237727v1	Scaffold	UBA3514		DFPN01	4523633	70	115365	158836	Enterobacter_hormaechei_(enterobacteria)	Enterobacter_hormaechei	NA	ftp://ftp.ncbi.nlm.nih.gov/genomes/all/GCA/002/377/275/GCA_002377275.1_ASM237727v1	University_of_Queensland	2017/09/27_00:00	2017/09/27_00:00	2017/09/27_00:00	2017/09/27_00:00	SAMN06455538	assembly	Enterobacter_spp	E_xiangfangensis	1	-		NA	absent	absent	-	present
SAMN06457282	metal						GCA_002453715.1	ASM245371v1	Scaffold	UBA6744		DKHM01	4524086	21	460744	158836	Enterobacter_hormaechei_(enterobacteria)	Enterobacter_hormaechei	NA	ftp://ftp.ncbi.nlm.nih.gov/genomes/all/GCA/002/453/715/GCA_002453715.1_ASM245371v1	University_of_Queensland	2017/10/05_00:00	2017/10/05_00:00	2017/10/05_00:00	2017/10/05_00:00	SAMN06457282	assembly	Enterobacter_spp	E_xiangfangensis	3	-		NA	absent	absent	-	absent
SAMN03333156	sputum	Homo_sapiens	Not_available		missing		GCF_000952605.1	ASM95260v1	Scaffold	NA	MNCRE14	JYMF01	4525676	81	131368	61645	Enterobacter_asburiae_(enterobacteria)	Enterobacter_asburiae	ftp://ftp.ncbi.nlm.nih.gov/genomes/all/GCF/000/952/605/GCF_000952605.1_ASM95260v1	ftp://ftp.ncbi.nlm.nih.gov/genomes/all/GCA/000/952/605/GCA_000952605.1_ASM95260v1	University_of_Minnesota	2015/03/13_00:00	2015/03/13_00:00	2015/03/13_00:00	2019/01/07_00:00	SAMN03333156	assembly	Enterobacter_spp	E_asburiae	#N/A	709		NA	absent	absent	blaNMC-A	present
SAMN09845212		Homo_sapiens					GCF_003964605.1	ASM396460v1	Contig	NA	WCHEH090035	RXRQ01	4532984	58	163005	158836	Enterobacter_hormaechei_(enterobacteria)	Enterobacter_hormaechei	ftp://ftp.ncbi.nlm.nih.gov/genomes/all/GCF/003/964/605/GCF_003964605.1_ASM396460v1	ftp://ftp.ncbi.nlm.nih.gov/genomes/all/GCA/003/964/605/GCA_003964605.1_ASM396460v1	West_China_Hospital,_Sichuan_University	2018/12/23_00:00	2018/12/23_00:00	2018/12/23_00:00	2018/12/28_00:00	SAMN09845212	assembly	Enterobacter_spp	E_xiangfangensis	3	127		NA	absent	absent	-	absent
SAMN04624399	crude_oil-contaminated_soil						GCF_001623605.1	ASM162360v1	Complete_Genome	NA	ODB01	NA	4534036	1	4534036	1827481	Enterobacter_sp._ODB01_(enterobacteria)	Enterobacter_sp._ODB01	ftp://ftp.ncbi.nlm.nih.gov/genomes/all/GCF/001/623/605/GCF_001623605.1_ASM162360v1	ftp://ftp.ncbi.nlm.nih.gov/genomes/all/GCA/001/623/605/GCA_001623605.1_ASM162360v1	Hunan_Agricultural_University	2016/04/19_00:00	2016/04/19_00:00	2016/04/19_00:00	2016/04/21_00:00	SAMN04624399	assembly	Enterobacter_spp	E_kobei	#N/A	56		NA	absent	absent	-	present
SAMN06451973	metal						GCA_002321975.1	ASM232197v1	Scaffold	UBA1600		DCNI01	4534141	78	141718	158836	Enterobacter_hormaechei_(enterobacteria)	Enterobacter_hormaechei	NA	ftp://ftp.ncbi.nlm.nih.gov/genomes/all/GCA/002/321/975/GCA_002321975.1_ASM232197v1	University_of_Queensland	2017/09/21_00:00	2017/09/21_00:00	2017/09/21_00:00	2017/09/21_00:00	SAMN06451973	assembly	Enterobacter_spp	E_xiangfangensis	1	-		NA	absent	absent	-	present
SAMN06767778	urine	Homo_sapiens	Unknown		Yonghong_Xiao		GCF_002785965.1	ASM278596v1	Scaffold	NA	ECC3422	NEEX01	4537078	38	202845	158836	Enterobacter_hormaechei_(enterobacteria)	Enterobacter_hormaechei	ftp://ftp.ncbi.nlm.nih.gov/genomes/all/GCF/002/785/965/GCF_002785965.1_ASM278596v1	ftp://ftp.ncbi.nlm.nih.gov/genomes/all/GCA/002/785/965/GCA_002785965.1_ASM278596v1	zhejiang_University	2017/11/17_00:00	2017/11/17_00:00	2017/11/17_00:00	2019/01/07_00:00	SAMN06767778	assembly	Enterobacter_spp	E_xiangfangensis	3	592		pSL483_pXuzhou21	absent	absent	-	absent
SAMN06455326	metal/plastic						GCA_002295245.1	ASM229524v1	Scaffold	UBA870		DBFW01	4543341	58	148843	158836	Enterobacter_hormaechei_(enterobacteria)	Enterobacter_hormaechei	NA	ftp://ftp.ncbi.nlm.nih.gov/genomes/all/GCA/002/295/245/GCA_002295245.1_ASM229524v1	University_of_Queensland	2017/09/12_00:00	2017/09/12_00:00	2017/09/12_00:00	2017/09/12_00:00	SAMN06455326	assembly	Enterobacter_spp	E_xiangfangensis	3	-		IncFII	absent	absent	-	absent
SAMN06455204	wood						GCA_002434365.1	ASM243436v1	Scaffold	UBA6555		DJJZ01	4545780	70	110993	158836	Enterobacter_hormaechei_(enterobacteria)	Enterobacter_hormaechei	NA	ftp://ftp.ncbi.nlm.nih.gov/genomes/all/GCA/002/434/365/GCA_002434365.1_ASM243436v1	University_of_Queensland	2017/10/04_00:00	2017/10/04_00:00	2017/10/04_00:00	2017/10/04_00:00	SAMN06455204	assembly	Enterobacter_spp	E_xiangfangensis	2	-		NA	absent	absent	-	absent
SAMN06812669	blood	Homo_sapiens	Unknown		David_van_Duin		GCF_002185225.2	ASM218522v2	Contig	NA	CRK0005	NEYO02	4546950	24	452377	61645	Enterobacter_asburiae_(enterobacteria)	Enterobacter_asburiae	ftp://ftp.ncbi.nlm.nih.gov/genomes/all/GCF/002/185/225/GCF_002185225.2_ASM218522v2	ftp://ftp.ncbi.nlm.nih.gov/genomes/all/GCA/002/185/225/GCA_002185225.2_ASM218522v2	JCVI	2018/11/14_00:00	2018/11/14_00:00	2018/11/14_00:00	2018/11/17_00:00	SAMN06812669	assembly	Enterobacter_spp	E_asburiae	#N/A	-		NA	absent	absent	-	present
SAMN05285327	Tomato_roots						GCF_001719105.1	ASM171910v1	Complete_Genome	NA	HK169	NA	4551186	1	4551186	1868135	Enterobacter_sp._HK169_(enterobacteria)	Enterobacter_sp._HK169	ftp://ftp.ncbi.nlm.nih.gov/genomes/all/GCF/001/719/105/GCF_001719105.1_ASM171910v1	ftp://ftp.ncbi.nlm.nih.gov/genomes/all/GCA/001/719/105/GCA_001719105.1_ASM171910v1	Korea_Research_Institute_of_Chemical_Technology	2016/09/06_00:00	2016/09/06_00:00	2016/09/06_00:00	2016/09/07_00:00	SAMN05285327	assembly	Enterobacter_spp	E_asburiae	#N/A	650		NA	absent	absent	-	present
SAMEA2709017	not_available:_to_be_reported_later	not_available				not_available:_to_be_reported_later	GCF_900635705.1	32407_E01	Complete_Genome	NA	NCTC11571	NA	4552052	1	4552052	550	Enterobacter_cloacae_(enterobacteria)	Enterobacter_cloacae	ftp://ftp.ncbi.nlm.nih.gov/genomes/all/GCF/900/635/705/GCF_900635705.1_32407_E01	ftp://ftp.ncbi.nlm.nih.gov/genomes/all/GCA/900/635/705/GCA_900635705.1_32407_E01	SC	2018/12/20_00:00	2018/12/24_00:00	2018/12/24_00:00	2018/12/28_00:00	SAMEA2709017	assembly	Enterobacter_spp	E_xiangfangensis	2	-		NA	absent	absent	-	absent
SAMN03159402							GCF_004368735.1	ASM436873v1	Scaffold	NA	NFIX55	SOCW01	4552357	22	402219	61645	Enterobacter_asburiae_(enterobacteria)	Enterobacter_asburiae	ftp://ftp.ncbi.nlm.nih.gov/genomes/all/GCF/004/368/735/GCF_004368735.1_ASM436873v1	ftp://ftp.ncbi.nlm.nih.gov/genomes/all/GCA/004/368/735/GCA_004368735.1_ASM436873v1	DOE_Joint_Genome_Institute	2019/03/22_00:00	2019/03/25_00:00	2019/03/25_00:00	2019/03/27_00:00	SAMN03159402	assembly	Enterobacter_spp	E_asburiae	#N/A	650		NA	absent	absent	-	present
SAMN03333163	Not_available	Homo_sapiens	Not_available		missing		GCF_000952575.1	ASM95257v1	Scaffold	NA	MNCRE20	JYMM01	4553179	86	130558	61645	Enterobacter_asburiae_(enterobacteria)	Enterobacter_asburiae	ftp://ftp.ncbi.nlm.nih.gov/genomes/all/GCF/000/952/575/GCF_000952575.1_ASM95257v1	ftp://ftp.ncbi.nlm.nih.gov/genomes/all/GCA/000/952/575/GCA_000952575.1_ASM95257v1	University_of_Minnesota	2015/03/13_00:00	2015/03/13_00:00	2015/03/13_00:00	2019/01/07_00:00	SAMN03333163	assembly	Enterobacter_spp	E_asburiae	#N/A	733		NA	absent	absent	-	present
SAMN10995773		Homo_sapiens					GCF_004331385.1	ASM433138v1	Contig	NA	WCHEQ120003	SJON01	4556005	51	214685	2529382	Enterobacter_sp._WCHEs120003_(enterobacteria)	Enterobacter_sp._WCHEs120003	ftp://ftp.ncbi.nlm.nih.gov/genomes/all/GCF/004/331/385/GCF_004331385.1_ASM433138v1	ftp://ftp.ncbi.nlm.nih.gov/genomes/all/GCA/004/331/385/GCA_004331385.1_ASM433138v1	West_China_Hospital,_Sichuan_University	2019/03/06_00:00	2019/03/06_00:00	2019/03/06_00:00	2019/03/12_00:00	SAMN10995773	assembly	Enterobacter_spp	E_wuhouensis	#N/A	-	yes	IncFIB_IncFII_IncR	absent	absent	-	absent
SAMN02138578	urine	missing					GCF_000492855.1	Ente_cloa_complex_MGH_38_V1	Scaffold	NA	MGH_38	AYIY01	4556185	9	2455743	1329834	Enterobacter_sp._MGH_38_(enterobacteria)	Enterobacter_sp._MGH_38	ftp://ftp.ncbi.nlm.nih.gov/genomes/all/GCF/000/492/855/GCF_000492855.1_Ente_cloa_complex_MGH_38_V1	ftp://ftp.ncbi.nlm.nih.gov/genomes/all/GCA/000/492/855/GCA_000492855.1_Ente_cloa_complex_MGH_38_V1	Broad_Institute	2013/10/30_00:00	2013/10/30_00:00	2013/10/30_00:00	2014/10/09_00:00	SAMN02138578	assembly	Enterobacter_spp	E_xiangfangensis	3	728		NA	absent	absent	-	absent
SAMN08917583	sugarcane	Saccharum_(sugarcane)					GCF_003057745.1	ASM305774v2	Contig	NA	RIT_418	QBJD02	4557387	44	238708	2202164	Enterobacter_sp._RIT_418_(enterobacteria)	Enterobacter_sp._RIT_418	ftp://ftp.ncbi.nlm.nih.gov/genomes/all/GCF/003/057/745/GCF_003057745.1_ASM305774v2	ftp://ftp.ncbi.nlm.nih.gov/genomes/all/GCA/003/057/745/GCA_003057745.2_ASM305774v2	Rochester_Institute_of_Technology	2018/06/30_00:00	2018/06/30_00:00	2018/06/30_00:00	2018/07/11_00:00	SAMN08917583	assembly	Enterobacter_spp	Unidentified-9	#N/A	-		NA	absent	absent	-	present
SAMN08932727		Homo_sapiens					GCF_003965425.1	ASM396542v1	Contig	NA	WCHEH045091	RXQH01	4558712	85	167337	158836	Enterobacter_hormaechei_(enterobacteria)	Enterobacter_hormaechei	ftp://ftp.ncbi.nlm.nih.gov/genomes/all/GCF/003/965/425/GCF_003965425.1_ASM396542v1	ftp://ftp.ncbi.nlm.nih.gov/genomes/all/GCA/003/965/425/GCA_003965425.1_ASM396542v1	West_China_Hospital,_Sichuan_University	2018/12/23_00:00	2018/12/23_00:00	2018/12/23_00:00	2018/12/28_00:00	SAMN08932727	assembly	Enterobacter_spp	E_xiangfangensis	3	-		NA	absent	absent	-	absent
SAMN02716203							GCF_000632395.1	ASM63239v1	Complete_Genome	NA	L1	NA	4561905	1	4561905	1421338	Enterobacter_asburiae_L1_(enterobacteria)	Enterobacter_asburiae	ftp://ftp.ncbi.nlm.nih.gov/genomes/all/GCF/000/632/395/GCF_000632395.1_ASM63239v1	ftp://ftp.ncbi.nlm.nih.gov/genomes/all/GCA/000/632/395/GCA_000632395.1_ASM63239v1	University_of_Malaya	2014/04/15_00:00	2014/04/15_00:00	2014/04/15_00:00	2015/01/21_00:00	SAMN02716203	assembly	Enterobacter_spp	E_asburiae	#N/A	720		NA	absent	absent	-	present
SAMN04407783	Unknown	Homo_sapiens	Bloodstream_infection		Vance_Fowler		GCF_001518245.1	ASM151824v1	Contig	NA	GN03848	LRCM01	4567841	108	70876	208224	Enterobacter_kobei_(enterobacteria)	Enterobacter_kobei	ftp://ftp.ncbi.nlm.nih.gov/genomes/all/GCF/001/518/245/GCF_001518245.1_ASM151824v1	ftp://ftp.ncbi.nlm.nih.gov/genomes/all/GCA/001/518/245/GCA_001518245.1_ASM151824v1	JCVI	2016/01/19_00:00	2016/01/19_00:00	2016/01/19_00:00	2016/06/24_00:00	SAMN04407783	assembly	Enterobacter_spp	E_kobei	#N/A	-		NA	absent	absent	-	present
SAMN03197661	missing	Homo_sapiens	missing		UW_clinical_laboratory		GCF_001055165.1	ASM105516v1	Scaffold	NA	467_ECLO	JVFX01	4568432	99	82600	208224	Enterobacter_kobei_(enterobacteria)	Enterobacter_kobei	ftp://ftp.ncbi.nlm.nih.gov/genomes/all/GCF/001/055/165/GCF_001055165.1_ASM105516v1	ftp://ftp.ncbi.nlm.nih.gov/genomes/all/GCA/001/055/165/GCA_001055165.1_ASM105516v1	University_of_Washington	2015/07/10_00:00	2015/07/10_00:00	2015/07/10_00:00	2019/01/07_00:00	SAMN03197661	assembly	Enterobacter_spp	E_kobei	#N/A	667		NA	absent	absent	-	present
SAMN08623824	bloodstream	Homo_sapiens	bacterial_infectious_disease		Stanford_Healthcare_Clinical_Microbiology_Laboratory		GCF_003401205.1	ASM340120v1	Contig	NA	CRE65	PXKB01	4570757	244	104000	1296536	Enterobacter_hormaechei_subsp._xiangfangensis_(enterobacteria)	Enterobacter_hormaechei	ftp://ftp.ncbi.nlm.nih.gov/genomes/all/GCF/003/401/205/GCF_003401205.1_ASM340120v1	ftp://ftp.ncbi.nlm.nih.gov/genomes/all/GCA/003/401/205/GCA_003401205.1_ASM340120v1	Stanford_Healthcare	2018/08/16_00:00	2018/08/16_00:00	2018/08/16_00:00	2018/08/21_00:00	SAMN08623824	assembly	Enterobacter_spp	E_xiangfangensis	3	-		IncR	absent	absent	-	absent
SAMN06455924	metal						GCA_002424975.1	ASM242497v1	Scaffold	UBA5596		DILI01	4572748	28	260754	158836	Enterobacter_hormaechei_(enterobacteria)	Enterobacter_hormaechei	NA	ftp://ftp.ncbi.nlm.nih.gov/genomes/all/GCA/002/424/975/GCA_002424975.1_ASM242497v1	University_of_Queensland	2017/10/04_00:00	2017/10/04_00:00	2017/10/04_00:00	2017/10/04_00:00	SAMN06455924	assembly	Enterobacter_spp	E_xiangfangensis	3	-		NA	absent	absent	-	absent
SAMN04532519	oil_contaminated_soil_collected_from_the_Noonmati_oil_refinery						GCF_001593645.1	ASM159364v1	Contig	NA	S1:CND1	LUGN01	4575660	14	445053	158836	Enterobacter_hormaechei_(enterobacteria)	Enterobacter_hormaechei	ftp://ftp.ncbi.nlm.nih.gov/genomes/all/GCF/001/593/645/GCF_001593645.1_ASM159364v1	ftp://ftp.ncbi.nlm.nih.gov/genomes/all/GCA/001/593/645/GCA_001593645.1_ASM159364v1	University_of_Calcutta	2016/03/17_00:00	2016/03/17_00:00	2016/03/17_00:00	2019/01/07_00:00	SAMN04532519	assembly	Enterobacter_spp	E_xiangfangensis	3	-		NA	absent	absent	-	absent
SAMN09283850		Zea_nicaraguensis					GCF_003231215.1	ASM323121v1	Scaffold	NA	3F11	QKVR01	4579319	265	29003	1812935	Enterobacter_roggenkampii_(enterobacteria)	Enterobacter_roggenkampii	ftp://ftp.ncbi.nlm.nih.gov/genomes/all/GCF/003/231/215/GCF_003231215.1_ASM323121v1	ftp://ftp.ncbi.nlm.nih.gov/genomes/all/GCA/003/231/215/GCA_003231215.1_ASM323121v1	University_of_Guelph	2018/06/15_00:00	2018/06/15_00:00	2018/06/15_00:00	2018/06/19_00:00	SAMN09283850	assembly	Enterobacter_spp	E_roggenkampii	#N/A	732		NA	absent	absent	-	present
SAMEA2273144	blood	Homo_sapiens					GCF_900076875.1	12045_4#22	Scaffold	NA	e292	FKCY01	4580762	40	186667	550	Enterobacter_cloacae_(enterobacteria)	Enterobacter_cloacae	ftp://ftp.ncbi.nlm.nih.gov/genomes/all/GCF/900/076/875/GCF_900076875.1_12045_4_22	ftp://ftp.ncbi.nlm.nih.gov/genomes/all/GCA/900/076/875/GCA_900076875.1_12045_4_22	SC	2016/04/13_00:00	2016/05/09_00:00	2016/05/09_00:00	2016/05/14_00:00	SAMEA2273144	assembly	Enterobacter_spp	E_xiangfangensis	2	102		NA	absent	absent	-	absent
SAMEA2709034	not_available:_to_be_reported_later	not_available				not_available:_to_be_reported_later	GCF_900447305.1	32512_B01	Contig	NA	NCTC13405	UGIT01	4584218	3	4571073	550	Enterobacter_cloacae_(enterobacteria)	Enterobacter_cloacae	ftp://ftp.ncbi.nlm.nih.gov/genomes/all/GCF/900/447/305/GCF_900447305.1_32512_B01	ftp://ftp.ncbi.nlm.nih.gov/genomes/all/GCA/900/447/305/GCA_900447305.1_32512_B01	SC	2018/08/01_00:00	2018/08/02_00:00	2018/08/02_00:00	2019/04/03_00:00	SAMEA2709034	assembly	Enterobacter_spp	E_xiangfangensis	4	108		NA	absent	absent	-	absent
SAMEA104694442	faecal	Homo_sapiens					GCA_902165275.1	25964_2#316	Contig	NA	4928STDY7387803	CABHGF01	4584399	42	186359	550	Enterobacter_cloacae_(enterobacteria)	Enterobacter_cloacae	NA	ftp://ftp.ncbi.nlm.nih.gov/genomes/all/GCA/902/165/275/GCA_902165275.1_25964_2_316	SC	2019/07/11_00:00	2019/07/12_00:00	2019/07/12_00:00	2019/07/13_00:00	SAMEA104694442	assembly	Enterobacter_spp	E_kobei	#N/A	56		NA	absent	absent	-	present
SAMN06451244	metal						GCA_002430905.1	ASM243090v1	Scaffold	UBA5932		DJDE01	4584518	58	222722	158836	Enterobacter_hormaechei_(enterobacteria)	Enterobacter_hormaechei	NA	ftp://ftp.ncbi.nlm.nih.gov/genomes/all/GCA/002/430/905/GCA_002430905.1_ASM243090v1	University_of_Queensland	2017/10/04_00:00	2017/10/04_00:00	2017/10/04_00:00	2017/10/04_00:00	SAMN06451244	assembly	Enterobacter_spp	E_xiangfangensis	1	536		NA	absent	absent	-	present
SAMN03732706	bodily_fluid	Homo_sapiens			Vance_Fowler		GCF_001022435.2	ASM102243v2	Contig	NA	GN02450	LEDX02	4585634	30	391364	299766	Enterobacter_hormaechei_subsp._steigerwaltii_(enterobacteria)	Enterobacter_hormaechei	ftp://ftp.ncbi.nlm.nih.gov/genomes/all/GCF/001/022/435/GCF_001022435.2_ASM102243v2	ftp://ftp.ncbi.nlm.nih.gov/genomes/all/GCA/001/022/435/GCA_001022435.2_ASM102243v2	JCVI	2016/03/28_00:00	2016/03/28_00:00	2016/03/28_00:00	2018/10/10_00:00	SAMN03732706	assembly	Enterobacter_spp	E_xiangfangensis	1	699		NA	absent	absent	-	present
SAMEA2273169	blood	Homo_sapiens					GCF_900077155.1	12045_4#45	Scaffold	NA	e448	FKEE01	4588228	37	198949	550	Enterobacter_cloacae_(enterobacteria)	Enterobacter_cloacae	ftp://ftp.ncbi.nlm.nih.gov/genomes/all/GCF/900/077/155/GCF_900077155.1_12045_4_45	ftp://ftp.ncbi.nlm.nih.gov/genomes/all/GCA/900/077/155/GCA_900077155.1_12045_4_45	SC	2016/04/13_00:00	2016/05/09_00:00	2016/05/09_00:00	2016/05/13_00:00	SAMEA2273169	assembly	Enterobacter_spp	E_kobei	#N/A	773		NA	absent	absent	-	present
SAMN04481089					Centers_for_Disease_Control_and_Prevention		GCF_001661155.1	ASM166115v1	Scaffold	NA	EA_75	LZCS01	4588704	24	480083	61645	Enterobacter_asburiae_(enterobacteria)	Enterobacter_asburiae	ftp://ftp.ncbi.nlm.nih.gov/genomes/all/GCF/001/661/155/GCF_001661155.1_ASM166115v1	ftp://ftp.ncbi.nlm.nih.gov/genomes/all/GCA/001/661/155/GCA_001661155.1_ASM166115v1	Centers_for_Disease_Control_and_Prevention._Division_of_Healthcare_Quality_Promotion	2016/06/10_00:00	2016/06/10_00:00	2016/06/10_00:00	2016/06/12_00:00	SAMN04481089	assembly	Enterobacter_spp	E_asburiae	#N/A	919		NA	absent	absent	blaIMI-12	present
SAMN08932886		Homo_sapiens					GCF_003965005.1	ASM396500v1	Contig	NA	WCHLN045625	RXQM01	4589047	42	389598	1812935	Enterobacter_roggenkampii_(enterobacteria)	Enterobacter_roggenkampii	ftp://ftp.ncbi.nlm.nih.gov/genomes/all/GCF/003/965/005/GCF_003965005.1_ASM396500v1	ftp://ftp.ncbi.nlm.nih.gov/genomes/all/GCA/003/965/005/GCA_003965005.1_ASM396500v1	West_China_Hospital,_Sichuan_University	2018/12/23_00:00	2018/12/23_00:00	2018/12/23_00:00	2018/12/28_00:00	SAMN08932886	assembly	Enterobacter_spp	E_roggenkampii	#N/A	-		NA	absent	absent	-	present
SAMN02356615	surgical_procedure_specimen	Homo_sapiens					GCF_000534195.1	Ente_cloa_UCI_35_V1	Scaffold	NA	UCI_35	JCKS01	4589093	17	566648	158836	Enterobacter_hormaechei_(enterobacteria)	Enterobacter_hormaechei	ftp://ftp.ncbi.nlm.nih.gov/genomes/all/GCF/000/534/195/GCF_000534195.1_Ente_cloa_UCI_35_V1	ftp://ftp.ncbi.nlm.nih.gov/genomes/all/GCA/000/534/195/GCA_000534195.1_Ente_cloa_UCI_35_V1	Broad_Institute	2014/02/03_00:00	2014/02/03_00:00	2014/02/03_00:00	2018/11/14_00:00	SAMN02356615	assembly	Enterobacter_spp	E_xiangfangensis	3	127		FIA_IncFIA	absent	absent	-	absent
SAMEA2273128	blood	Homo_sapiens					GCF_900077895.1	12045_4#7	Scaffold	NA	e85	FKHD01	4589663	45	238593	550	Enterobacter_cloacae_(enterobacteria)	Enterobacter_cloacae	ftp://ftp.ncbi.nlm.nih.gov/genomes/all/GCF/900/077/895/GCF_900077895.1_12045_4_7	ftp://ftp.ncbi.nlm.nih.gov/genomes/all/GCA/900/077/895/GCA_900077895.1_12045_4_7	SC	2016/04/13_00:00	2016/05/09_00:00	2016/05/09_00:00	2016/05/14_00:00	SAMEA2273128	assembly	Enterobacter_spp	E_xiangfangensis	1	461		NA	absent	absent	-	present
SAMN11031503		Homo_sapiens					GCF_004355165.1	ASM435516v1	Complete_Genome	NA	N13-01531	NA	4590029	1	4590029	2027919	Enterobacter_cloacae_complex_sp._(enterobacteria)	Enterobacter_cloacae_complex_sp.	ftp://ftp.ncbi.nlm.nih.gov/genomes/all/GCF/004/355/165/GCF_004355165.1_ASM435516v1	ftp://ftp.ncbi.nlm.nih.gov/genomes/all/GCA/004/355/165/GCA_004355165.1_ASM435516v1	Public_Health_Agency_of_Canada	2019/03/19_00:00	2019/03/19_00:00	2019/03/19_00:00	2019/03/21_00:00	SAMN11031503	assembly	Enterobacter_spp	E_vonholyi	#N/A	261		NA	absent	absent	-	present
SAMN08712273	alpine_spring_water						GCF_005503595.1	ASM550359v1	Contig	NA	2VL	SCNE01	4590525	22	560177	2502206	Enterobacter_sp._2VL_(enterobacteria)	Enterobacter_sp._2VL	ftp://ftp.ncbi.nlm.nih.gov/genomes/all/GCF/005/503/595/GCF_005503595.1_ASM550359v1	ftp://ftp.ncbi.nlm.nih.gov/genomes/all/GCA/005/503/595/GCA_005503595.1_ASM550359v1	University_of_Trento	2019/05/17_00:00	2019/05/17_00:00	2019/05/17_00:00	2019/05/21_00:00	SAMN08712273	assembly	Enterobacter_spp	E_cancerogenus	#N/A	-		NA	absent	absent	-	present
SAMN02951907		yellow_yam					GCF_000568075.1	DC1_v1	Contig	NA	DC1	AZUA01	4590638	18	641161	314330	Enterobacter_sp._DC1_(enterobacteria)	Enterobacter_sp._DC1	ftp://ftp.ncbi.nlm.nih.gov/genomes/all/GCF/000/568/075/GCF_000568075.1_DC1_v1	ftp://ftp.ncbi.nlm.nih.gov/genomes/all/GCA/000/568/075/GCA_000568075.1_DC1_v1	Monash_University	2014/02/10_00:00	2014/02/10_00:00	2014/02/10_00:00	2014/10/09_00:00	SAMN02951907	assembly	Enterobacter_spp	E_asburiae	#N/A	684		NA	absent	absent	-	present
SAMN09845218		Homo_sapiens					GCF_003964585.1	ASM396458v1	Contig	NA	WCHEH090043	RXRW01	4592856	78	204125	158836	Enterobacter_hormaechei_(enterobacteria)	Enterobacter_hormaechei	ftp://ftp.ncbi.nlm.nih.gov/genomes/all/GCF/003/964/585/GCF_003964585.1_ASM396458v1	ftp://ftp.ncbi.nlm.nih.gov/genomes/all/GCA/003/964/585/GCA_003964585.1_ASM396458v1	West_China_Hospital,_Sichuan_University	2018/12/23_00:00	2018/12/23_00:00	2018/12/23_00:00	2018/12/28_00:00	SAMN09845218	assembly	Enterobacter_spp	E_xiangfangensis	3	337		NA	absent	absent	-	absent
SAMN09845217		Homo_sapiens					GCF_003964925.1	ASM396492v1	Contig	NA	WCHEH090042	RXRV01	4593505	48	271909	158836	Enterobacter_hormaechei_(enterobacteria)	Enterobacter_hormaechei	ftp://ftp.ncbi.nlm.nih.gov/genomes/all/GCF/003/964/925/GCF_003964925.1_ASM396492v1	ftp://ftp.ncbi.nlm.nih.gov/genomes/all/GCA/003/964/925/GCA_003964925.1_ASM396492v1	West_China_Hospital,_Sichuan_University	2018/12/23_00:00	2018/12/23_00:00	2018/12/23_00:00	2018/12/28_00:00	SAMN09845217	assembly	Enterobacter_spp	E_xiangfangensis	1	828		NA	absent	absent	-	present
SAMN04572596	Unknown	Homo_sapiens	Bloodstream_infection		Vance_Fowler		GCF_001631055.1	ASM163105v1	Contig	NA	GN04967	LVTX01	4593961	84	85094	299766	Enterobacter_hormaechei_subsp._steigerwaltii_(enterobacteria)	Enterobacter_hormaechei	ftp://ftp.ncbi.nlm.nih.gov/genomes/all/GCF/001/631/055/GCF_001631055.1_ASM163105v1	ftp://ftp.ncbi.nlm.nih.gov/genomes/all/GCA/001/631/055/GCA_001631055.1_ASM163105v1	JCVI	2016/04/25_00:00	2016/04/25_00:00	2016/04/25_00:00	2016/04/26_00:00	SAMN04572596	assembly	Enterobacter_spp	E_xiangfangensis	1	-		NA	absent	absent	-	present
SAMN06457145	metal/plastic						GCA_002363435.1	ASM236343v1	Scaffold	UBA3234		DEVO01	4595201	149	81216	550	Enterobacter_cloacae_(enterobacteria)	Enterobacter_cloacae	NA	ftp://ftp.ncbi.nlm.nih.gov/genomes/all/GCA/002/363/435/GCA_002363435.1_ASM236343v1	University_of_Queensland	2017/09/26_00:00	2017/09/26_00:00	2017/09/26_00:00	2017/09/26_00:00	SAMN06457145	assembly	Enterobacter_spp	E_ludwigii	#N/A	-		NA	absent	absent	-	present
SAMN03732698	bodily_fluid	Homo_sapiens			Vance_Fowler		GCF_001023385.1	ASM102338v1	Contig	NA	GN02346	LEEE01	4595961	24	315515	299766	Enterobacter_hormaechei_subsp._steigerwaltii_(enterobacteria)	Enterobacter_hormaechei	ftp://ftp.ncbi.nlm.nih.gov/genomes/all/GCF/001/023/385/GCF_001023385.1_ASM102338v1	ftp://ftp.ncbi.nlm.nih.gov/genomes/all/GCA/001/023/385/GCA_001023385.1_ASM102338v1	JCVI	2015/06/09_00:00	2015/06/09_00:00	2015/06/09_00:00	2016/06/24_00:00	SAMN03732698	assembly	Enterobacter_spp	E_xiangfangensis	1	46		NA	absent	absent	-	present
SAMN09734856	feces	Homo_sapiens					GCF_003433665.1	ASM343366v1	Scaffold	NA	AM17-61	QVHU01	4596352	45	231379	158836	Enterobacter_hormaechei_(enterobacteria)	Enterobacter_hormaechei	ftp://ftp.ncbi.nlm.nih.gov/genomes/all/GCF/003/433/665/GCF_003433665.1_ASM343366v1	ftp://ftp.ncbi.nlm.nih.gov/genomes/all/GCA/003/433/665/GCA_003433665.1_ASM343366v1	BGI	2018/08/31_00:00	2018/08/31_00:00	2018/08/31_00:00	2018/09/04_00:00	SAMN09734856	assembly	Enterobacter_spp	E_xiangfangensis	3	-		IncFIB_IncFII	absent	absent	-	absent
SAMN03732694	bodily_fluid	Homo_sapiens			Vance_Fowler		GCF_001023315.1	ASM102331v1	Contig	NA	GN02315	LEEI01	4597454	36	237922	301105	Enterobacter_hormaechei_subsp._hormaechei_(enterobacteria)	Enterobacter_hormaechei	ftp://ftp.ncbi.nlm.nih.gov/genomes/all/GCF/001/023/315/GCF_001023315.1_ASM102331v1	ftp://ftp.ncbi.nlm.nih.gov/genomes/all/GCA/001/023/315/GCA_001023315.1_ASM102331v1	JCVI	2015/06/09_00:00	2015/06/09_00:00	2015/06/09_00:00	2016/07/07_00:00	SAMN03732694	assembly	Enterobacter_spp	E_hormaechei	#N/A	696		NA	absent	absent	-	absent
SAMN09845196		Homo_sapiens					GCF_003986855.1	ASM398685v1	Contig	NA	WCHEH090018	RXRB01	4599290	28	504485	158836	Enterobacter_hormaechei_(enterobacteria)	Enterobacter_hormaechei	ftp://ftp.ncbi.nlm.nih.gov/genomes/all/GCF/003/986/855/GCF_003986855.1_ASM398685v1	ftp://ftp.ncbi.nlm.nih.gov/genomes/all/GCA/003/986/855/GCA_003986855.1_ASM398685v1	West_China_Hospital,_Sichuan_University	2018/12/23_00:00	2018/12/31_00:00	2018/12/31_00:00	2019/01/02_00:00	SAMN09845196	assembly	Enterobacter_spp	E_xiangfangensis	1	-		NA	absent	absent	-	present
SAMN07448199	stool	Homo_sapiens	None_(screening_isolate)		Koh_Tse_Hsien,_Singapore_General_Hospital		GCF_002266365.1	ASM226636v1	Scaffold	NA	DS23372	NPNT01	4599899	41	208775	1812935	Enterobacter_roggenkampii_(enterobacteria)	Enterobacter_roggenkampii	ftp://ftp.ncbi.nlm.nih.gov/genomes/all/GCF/002/266/365/GCF_002266365.1_ASM226636v1	ftp://ftp.ncbi.nlm.nih.gov/genomes/all/GCA/002/266/365/GCA_002266365.1_ASM226636v1	National_University_of_Singapore_and_Genome_Institute_of_Singapore	2017/08/22_00:00	2017/08/22_00:00	2017/08/22_00:00	2019/01/07_00:00	SAMN07448199	assembly	Enterobacter_spp	E_roggenkampii	#N/A	-		NA	absent	absent	blaIMI-1	present
SAMN09845190		Homo_sapiens					GCF_003965685.1	ASM396568v1	Contig	NA	WCHEH090012	RXQV01	4604277	41	467451	158836	Enterobacter_hormaechei_(enterobacteria)	Enterobacter_hormaechei	ftp://ftp.ncbi.nlm.nih.gov/genomes/all/GCF/003/965/685/GCF_003965685.1_ASM396568v1	ftp://ftp.ncbi.nlm.nih.gov/genomes/all/GCA/003/965/685/GCA_003965685.1_ASM396568v1	West_China_Hospital,_Sichuan_University	2018/12/23_00:00	2018/12/23_00:00	2018/12/23_00:00	2018/12/28_00:00	SAMN09845190	assembly	Enterobacter_spp	E_xiangfangensis	1	-		IncFIA_IncFIB_IncFII	absent	absent	-	present
SAMEA2273397	blood	Homo_sapiens					GCF_900076025.1	11983_6#75	Scaffold	NA	e1682	FKAC01	4605019	35	243570	550	Enterobacter_cloacae_(enterobacteria)	Enterobacter_cloacae	ftp://ftp.ncbi.nlm.nih.gov/genomes/all/GCF/900/076/025/GCF_900076025.1_11983_6_75	ftp://ftp.ncbi.nlm.nih.gov/genomes/all/GCA/900/076/025/GCA_900076025.1_11983_6_75	SC	2016/04/13_00:00	2016/05/09_00:00	2016/05/09_00:00	2016/05/12_00:00	SAMEA2273397	assembly	Enterobacter_spp	E_kobei	#N/A	1001		NA	absent	absent	-	present
SAMN08743197		Homo_sapiens					GCF_003057135.1	ASM305713v1	Contig	NA	AUH-ENM9	PYHE01	4606999	58	542695	158836	Enterobacter_hormaechei_(enterobacteria)	Enterobacter_hormaechei	ftp://ftp.ncbi.nlm.nih.gov/genomes/all/GCF/003/057/135/GCF_003057135.1_ASM305713v1	ftp://ftp.ncbi.nlm.nih.gov/genomes/all/GCA/003/057/135/GCA_003057135.1_ASM305713v1	Lebanese_American_University	2018/04/18_00:00	2018/04/18_00:00	2018/04/18_00:00	2019/01/07_00:00	SAMN08743197	assembly	Enterobacter_spp	E_xiangfangensis	2	-		NA	absent	absent	-	absent
SAMN03280184	missing	Homo_sapiens	missing	missing	missing	missing	GCF_001037725.1	Ente_cloa_complex_MGH120_V1	Scaffold	NA	MGH120	LETH01	4607622	13	604623	1686392	Enterobacter_sp._MGH120_(enterobacteria)	Enterobacter_sp._MGH120	ftp://ftp.ncbi.nlm.nih.gov/genomes/all/GCF/001/037/725/GCF_001037725.1_Ente_cloa_complex_MGH120_V1	ftp://ftp.ncbi.nlm.nih.gov/genomes/all/GCA/001/037/725/GCA_001037725.1_Ente_cloa_complex_MGH120_V1	Broad_Institute	2015/06/22_00:00	2015/06/22_00:00	2015/06/22_00:00	2016/01/21_00:00	SAMN03280184	assembly	Enterobacter_spp	E_xiangfangensis	1	79		NA	absent	absent	-	present
SAMEA4623362	faecal	Homo_sapiens					GCA_902166165.1	26009_2#46	Scaffold	NA	4928STDY7387954	CABHJI01	4608127	26	1234931	550	Enterobacter_cloacae_(enterobacteria)	Enterobacter_cloacae	NA	ftp://ftp.ncbi.nlm.nih.gov/genomes/all/GCA/902/166/165/GCA_902166165.1_26009_2_46	SC	2019/07/11_00:00	2019/07/12_00:00	2019/07/12_00:00	2019/07/13_00:00	SAMEA4623362	assembly	Enterobacter_spp	E_xiangfangensis	2	-		NA	absent	absent	-	absent
SAMEA104567253	faecal	Homo_sapiens					GCA_902162665.1	25964_2#30	Scaffold	NA	4928STDY7071154	CABGWC01	4608235	28	464271	550	Enterobacter_cloacae_(enterobacteria)	Enterobacter_cloacae	NA	ftp://ftp.ncbi.nlm.nih.gov/genomes/all/GCA/902/162/665/GCA_902162665.1_25964_2_30	SC	2019/07/11_00:00	2019/07/12_00:00	2019/07/12_00:00	2019/07/12_00:00	SAMEA104567253	assembly	Enterobacter_spp	E_xiangfangensis	2	-		NA	absent	absent	-	absent
SAMN09845204		Homo_sapiens					GCF_003965215.1	ASM396521v1	Contig	NA	WCHEH090027	RXRJ01	4608848	127	58227	158836	Enterobacter_hormaechei_(enterobacteria)	Enterobacter_hormaechei	ftp://ftp.ncbi.nlm.nih.gov/genomes/all/GCF/003/965/215/GCF_003965215.1_ASM396521v1	ftp://ftp.ncbi.nlm.nih.gov/genomes/all/GCA/003/965/215/GCA_003965215.1_ASM396521v1	West_China_Hospital,_Sichuan_University	2018/12/23_00:00	2018/12/23_00:00	2018/12/23_00:00	2018/12/28_00:00	SAMN09845204	assembly	Enterobacter_spp	E_hormaechei	#N/A	528		NA	absent	absent	-	absent
SAMEA2273295	blood	Homo_sapiens					GCF_900075125.1	11983_7#71	Scaffold	NA	e1150	FJWE01	4609047	30	311232	550	Enterobacter_cloacae_(enterobacteria)	Enterobacter_cloacae	ftp://ftp.ncbi.nlm.nih.gov/genomes/all/GCF/900/075/125/GCF_900075125.1_11983_7_71	ftp://ftp.ncbi.nlm.nih.gov/genomes/all/GCA/900/075/125/GCA_900075125.1_11983_7_71	SC	2016/04/04_00:00	2016/04/06_00:00	2016/04/06_00:00	2016/04/08_00:00	SAMEA2273295	assembly	Enterobacter_spp	E_xiangfangensis	1	785		NA	absent	absent	-	present
SAMEA2273195	blood	Homo_sapiens					GCF_900077405.1	12045_4#67	Scaffold	NA	e592	FKFC01	4611518	32	321075	550	Enterobacter_cloacae_(enterobacteria)	Enterobacter_cloacae	ftp://ftp.ncbi.nlm.nih.gov/genomes/all/GCF/900/077/405/GCF_900077405.1_12045_4_67	ftp://ftp.ncbi.nlm.nih.gov/genomes/all/GCA/900/077/405/GCA_900077405.1_12045_4_67	SC	2016/04/13_00:00	2016/05/09_00:00	2016/05/09_00:00	2016/05/14_00:00	SAMEA2273195	assembly	Enterobacter_spp	E_xiangfangensis	1	776		NA	absent	absent	-	present
SAMEA2273339	blood	Homo_sapiens					GCF_900075575.1	11983_6#18	Scaffold	NA	e1343	FJYJ01	4614489	37	230656	550	Enterobacter_cloacae_(enterobacteria)	Enterobacter_cloacae	ftp://ftp.ncbi.nlm.nih.gov/genomes/all/GCF/900/075/575/GCF_900075575.1_11983_6_18	ftp://ftp.ncbi.nlm.nih.gov/genomes/all/GCA/900/075/575/GCA_900075575.1_11983_6_18	SC	2016/04/04_00:00	2016/04/06_00:00	2016/04/06_00:00	2016/04/12_00:00	SAMEA2273339	assembly	Enterobacter_spp	E_xiangfangensis	1	151		NA	absent	absent	-	present
SAMN09845208		Homo_sapiens					GCF_003964645.1	ASM396464v1	Contig	NA	WCHEB090031	RXRM01	4618173	38	319092	881260	Enterobacter_bugandensis_(enterobacteria)	Enterobacter_bugandensis	ftp://ftp.ncbi.nlm.nih.gov/genomes/all/GCF/003/964/645/GCF_003964645.1_ASM396464v1	ftp://ftp.ncbi.nlm.nih.gov/genomes/all/GCA/003/964/645/GCA_003964645.1_ASM396464v1	West_China_Hospital,_Sichuan_University	2018/12/23_00:00	2018/12/23_00:00	2018/12/23_00:00	2018/12/28_00:00	SAMN09845208	assembly	Enterobacter_spp	E_bugandensis	#N/A	-		NA	absent	absent	-	present
SAMN09845223		Homo_sapiens					GCF_003964485.1	ASM396448v1	Contig	NA	WCHEA090058	RXSB01	4618376	30	537131	61645	Enterobacter_asburiae_(enterobacteria)	Enterobacter_asburiae	ftp://ftp.ncbi.nlm.nih.gov/genomes/all/GCF/003/964/485/GCF_003964485.1_ASM396448v1	ftp://ftp.ncbi.nlm.nih.gov/genomes/all/GCA/003/964/485/GCA_003964485.1_ASM396448v1	West_China_Hospital,_Sichuan_University	2018/12/23_00:00	2018/12/23_00:00	2018/12/23_00:00	2018/12/28_00:00	SAMN09845223	assembly	Enterobacter_spp	E_asburiae	#N/A	879		NA	absent	absent	-	present
SAMN04578345	Unknown	Homo_sapiens	Bloodstream_infection		Vance_Fowler		GCF_001631745.1	ASM163174v1	Contig	NA	GN06520	LVVI01	4618549	60	136903	1812935	Enterobacter_roggenkampii_(enterobacteria)	Enterobacter_roggenkampii	ftp://ftp.ncbi.nlm.nih.gov/genomes/all/GCF/001/631/745/GCF_001631745.1_ASM163174v1	ftp://ftp.ncbi.nlm.nih.gov/genomes/all/GCA/001/631/745/GCA_001631745.1_ASM163174v1	JCVI	2016/04/25_00:00	2016/04/25_00:00	2016/04/25_00:00	2016/04/26_00:00	SAMN04578345	assembly	Enterobacter_spp	E_roggenkampii	#N/A	-		NA	absent	absent	-	present
SAMN04407792	Unknown	Homo_sapiens	Bloodstream_infection		Vance_Fowler		GCF_001518395.1	ASM151839v1	Contig	NA	GN05729	LRCV01	4619341	38	220596	881260	Enterobacter_bugandensis_(enterobacteria)	Enterobacter_bugandensis	ftp://ftp.ncbi.nlm.nih.gov/genomes/all/GCF/001/518/395/GCF_001518395.1_ASM151839v1	ftp://ftp.ncbi.nlm.nih.gov/genomes/all/GCA/001/518/395/GCA_001518395.1_ASM151839v1	JCVI	2016/01/19_00:00	2016/01/19_00:00	2016/01/19_00:00	2016/07/19_00:00	SAMN04407792	assembly	Enterobacter_spp	E_bugandensis	#N/A	-		NA	absent	absent	-	present
SAMEA2273474	blood	Homo_sapiens					GCF_900076745.1	12045_5#54	Scaffold	NA	e272	FKDB01	4620136	75	148053	550	Enterobacter_cloacae_(enterobacteria)	Enterobacter_cloacae	ftp://ftp.ncbi.nlm.nih.gov/genomes/all/GCF/900/076/745/GCF_900076745.1_12045_5_54	ftp://ftp.ncbi.nlm.nih.gov/genomes/all/GCA/900/076/745/GCA_900076745.1_12045_5_54	SC	2016/04/13_00:00	2016/05/09_00:00	2016/05/09_00:00	2016/05/14_00:00	SAMEA2273474	assembly	Enterobacter_spp	E_xiangfangensis	4	-		NA	absent	absent	-	absent
SAMN02592616	oil_well						GCF_000612205.1	EntSp1.0	Contig	NA	5-4	JFHW01	4621281	36	358174	1444288	Enterobacter_sp._5-4_(enterobacteria)	Enterobacter_roggenkampii	ftp://ftp.ncbi.nlm.nih.gov/genomes/all/GCF/000/612/205/GCF_000612205.1_EntSp1.0	ftp://ftp.ncbi.nlm.nih.gov/genomes/all/GCA/000/612/205/GCA_000612205.1_EntSp1.0	The_First_Affiliated_Hospital,_School_of_Medicine,_Zhejiang_University	2014/04/02_00:00	2014/04/09_00:00	2014/04/09_00:00	2014/10/09_00:00	SAMN02592616	assembly	Enterobacter_spp	E_roggenkampii	#N/A	651		NA	absent	absent	-	present
SAMN08737110		Homo_sapiens					GCF_003056785.1	ASM305678v1	Contig	NA	AUH-ENM4	PYGZ01	4621618	96	490514	158836	Enterobacter_hormaechei_(enterobacteria)	Enterobacter_hormaechei	ftp://ftp.ncbi.nlm.nih.gov/genomes/all/GCF/003/056/785/GCF_003056785.1_ASM305678v1	ftp://ftp.ncbi.nlm.nih.gov/genomes/all/GCA/003/056/785/GCA_003056785.1_ASM305678v1	Lebanese_American_University	2018/04/18_00:00	2018/04/18_00:00	2018/04/18_00:00	2019/01/07_00:00	SAMN08737110	assembly	Enterobacter_spp	E_xiangfangensis	2	-		NA	absent	absent	-	absent
SAMN03197429	missing	Homo_sapiens	missing		UW_clinical_laboratory		GCF_001054695.1	ASM105469v1	Scaffold	NA	24_ECLO	JVOV01	4621755	61	129314	299766	Enterobacter_hormaechei_subsp._steigerwaltii_(enterobacteria)	Enterobacter_hormaechei	ftp://ftp.ncbi.nlm.nih.gov/genomes/all/GCF/001/054/695/GCF_001054695.1_ASM105469v1	ftp://ftp.ncbi.nlm.nih.gov/genomes/all/GCA/001/054/695/GCA_001054695.1_ASM105469v1	University_of_Washington	2015/07/10_00:00	2015/07/10_00:00	2015/07/10_00:00	2016/07/19_00:00	SAMN03197429	assembly	Enterobacter_spp	E_xiangfangensis	1	170		NA	absent	absent	-	present
SAMN04572602	Unknown	Homo_sapiens	Bloodstream_infection		Vance_Fowler		GCF_001631275.1	ASM163127v1	Contig	NA	GN05420	LVUD01	4622264	153	45279	299766	Enterobacter_hormaechei_subsp._steigerwaltii_(enterobacteria)	Enterobacter_hormaechei	ftp://ftp.ncbi.nlm.nih.gov/genomes/all/GCF/001/631/275/GCF_001631275.1_ASM163127v1	ftp://ftp.ncbi.nlm.nih.gov/genomes/all/GCA/001/631/275/GCA_001631275.1_ASM163127v1	JCVI	2016/04/25_00:00	2016/04/25_00:00	2016/04/25_00:00	2016/04/26_00:00	SAMN04572602	assembly	Enterobacter_spp	E_xiangfangensis	1	48		NA	absent	absent	-	present
SAMN07974466	missing	Homo_sapiens	missing		Yohei_Doi		GCF_002886565.1	ASM288656v1	Contig	NA	YDC518	PGIM01	4622802	92	142326	158836	Enterobacter_hormaechei_(enterobacteria)	Enterobacter_hormaechei	ftp://ftp.ncbi.nlm.nih.gov/genomes/all/GCF/002/886/565/GCF_002886565.1_ASM288656v1	ftp://ftp.ncbi.nlm.nih.gov/genomes/all/GCA/002/886/565/GCA_002886565.1_ASM288656v1	University_of_Maryland,_School_of_Medicine	2018/01/17_00:00	2018/01/17_00:00	2018/01/17_00:00	2018/01/21_00:00	SAMN07974466	assembly	Enterobacter_spp	E_hormaechei	#N/A	269		Col_IncA/C_IncA/C2	absent	absent	blaKPC-3	absent
SAMN04572696	Unknown	Homo_sapiens	Bloodstream_infection		Vance_Fowler		GCF_001631235.1	ASM163123v1	Contig	NA	GN05911	LVUU01	4623735	57	175342	299766	Enterobacter_hormaechei_subsp._steigerwaltii_(enterobacteria)	Enterobacter_hormaechei	ftp://ftp.ncbi.nlm.nih.gov/genomes/all/GCF/001/631/235/GCF_001631235.1_ASM163123v1	ftp://ftp.ncbi.nlm.nih.gov/genomes/all/GCA/001/631/235/GCA_001631235.1_ASM163123v1	JCVI	2016/04/25_00:00	2016/04/25_00:00	2016/04/25_00:00	2016/04/26_00:00	SAMN04572696	assembly	Enterobacter_spp	E_xiangfangensis	1	-		NA	absent	absent	-	present
SAMEA2273398	blood	Homo_sapiens					GCF_900076035.1	11983_6#76	Scaffold	NA	e1690	FKAD01	4623944	25	336041	550	Enterobacter_cloacae_(enterobacteria)	Enterobacter_cloacae	ftp://ftp.ncbi.nlm.nih.gov/genomes/all/GCF/900/076/035/GCF_900076035.1_11983_6_76	ftp://ftp.ncbi.nlm.nih.gov/genomes/all/GCA/900/076/035/GCA_900076035.1_11983_6_76	SC	2016/04/04_00:00	2016/04/06_00:00	2016/04/06_00:00	2016/04/12_00:00	SAMEA2273398	assembly	Enterobacter_spp	E_xiangfangensis	1	797		NA	absent	absent	-	present
SAMN04578344	Unknown	Homo_sapiens	Bloodstream_infection		Vance_Fowler		GCF_001631805.1	ASM163180v1	Contig	NA	GN06232	LVVA01	4624242	24	361539	2364151	Enterobacter_genomosp._S_(enterobacteria)	Enterobacter_genomosp._S	ftp://ftp.ncbi.nlm.nih.gov/genomes/all/GCF/001/631/805/GCF_001631805.1_ASM163180v1	ftp://ftp.ncbi.nlm.nih.gov/genomes/all/GCA/001/631/805/GCA_001631805.1_ASM163180v1	JCVI	2016/04/25_00:00	2016/04/25_00:00	2016/04/25_00:00	2016/04/26_00:00	SAMN04578344	assembly	Enterobacter_spp	E_wuhouensis	#N/A	-		IncFIB	absent	absent	-	absent
SAMN02787124							GCF_000799205.1	ASM79920v1	Scaffold	NA	PDN3	JUGH01	4625174	16	627840	61645	Enterobacter_asburiae_(enterobacteria)	Enterobacter_asburiae	ftp://ftp.ncbi.nlm.nih.gov/genomes/all/GCF/000/799/205/GCF_000799205.1_ASM79920v1	ftp://ftp.ncbi.nlm.nih.gov/genomes/all/GCA/000/799/205/GCA_000799205.1_ASM79920v1	DOE_Joint_Genome_Institute	2014/12/09_00:00	2014/12/09_00:00	2014/12/09_00:00	2015/06/17_00:00	SAMN02787124	assembly	Enterobacter_spp	E_asburiae	#N/A	-		NA	absent	absent	-	present
SAMN09273076		Homo_sapiens					GCF_003207215.1	ASM320721v1	Contig	NA	CS-35	QISK01	4625541	26	408449	158836	Enterobacter_hormaechei_(enterobacteria)	Enterobacter_hormaechei	ftp://ftp.ncbi.nlm.nih.gov/genomes/all/GCF/003/207/215/GCF_003207215.1_ASM320721v1	ftp://ftp.ncbi.nlm.nih.gov/genomes/all/GCA/003/207/215/GCA_003207215.1_ASM320721v1	Shanghai_Entry-Exit_Inspection_and_Quarantine_Bureau	2018/06/11_00:00	2018/06/11_00:00	2018/06/11_00:00	2019/01/07_00:00	SAMN09273076	assembly	Enterobacter_spp	E_xiangfangensis	3	264		NA	absent	absent	-	absent
SAMN06452913	wood						GCA_002306215.1	ASM230621v1	Scaffold	UBA1352		DBSC01	4625944	40	228253	158836	Enterobacter_hormaechei_(enterobacteria)	Enterobacter_hormaechei	NA	ftp://ftp.ncbi.nlm.nih.gov/genomes/all/GCA/002/306/215/GCA_002306215.1_ASM230621v1	University_of_Queensland	2017/09/15_00:00	2017/09/15_00:00	2017/09/15_00:00	2017/09/15_00:00	SAMN06452913	assembly	Enterobacter_spp	E_xiangfangensis	1	-		NA	absent	absent	-	present
SAMN02470869	sugarcane_stem_tissue						GCF_000286655.1	ASM28665v1	Contig	NA	SST3	ALNS01	4626853	63	140850	1216470	Enterobacter_sp._SST3_(enterobacteria)	Enterobacter_roggenkampii	ftp://ftp.ncbi.nlm.nih.gov/genomes/all/GCF/000/286/655/GCF_000286655.1_ASM28665v1	ftp://ftp.ncbi.nlm.nih.gov/genomes/all/GCA/000/286/655/GCA_000286655.1_ASM28665v1	Rochester_Institute_of_Technology	2012/08/10_00:00	2012/08/10_00:00	2012/08/10_00:00	2014/10/09_00:00	SAMN02470869	assembly	Enterobacter_spp	E_roggenkampii	#N/A	737		NA	absent	absent	-	present
SAMN06689580	brown_patch_in_grass	Rhizoctonia_solani					GCF_002863825.1	ASM286382v1	Complete_Genome	NA	Crenshaw	NA	4630785	1	4630785	1977566	Enterobacter_sp._Crenshaw_(enterobacteria)	Enterobacter_sp._Crenshaw	ftp://ftp.ncbi.nlm.nih.gov/genomes/all/GCF/002/863/825/GCF_002863825.1_ASM286382v1	ftp://ftp.ncbi.nlm.nih.gov/genomes/all/GCA/002/863/825/GCA_002863825.1_ASM286382v1	University_of_Florida	2018/01/05_00:00	2018/01/05_00:00	2018/01/05_00:00	2018/01/11_00:00	SAMN06689580	assembly	Enterobacter_spp	E_asburiae	#N/A	657		NA	absent	absent	-	present
SAMN06453135	wood						GCA_002440345.1	ASM244034v1	Scaffold	UBA6319		DJTB01	4631821	90	98673	158836	Enterobacter_hormaechei_(enterobacteria)	Enterobacter_hormaechei	NA	ftp://ftp.ncbi.nlm.nih.gov/genomes/all/GCA/002/440/345/GCA_002440345.1_ASM244034v1	University_of_Queensland	2017/10/04_00:00	2017/10/04_00:00	2017/10/04_00:00	2017/10/04_00:00	SAMN06453135	assembly	Enterobacter_spp	E_xiangfangensis	1	-		NA	absent	absent	-	present
SAMN03280183	missing	Homo_sapiens	missing	missing	missing	missing	GCF_001037675.1	Ente_cloa_complex_MGH119_V1	Scaffold	NA	MGH119	LETG01	4631861	14	698338	1686391	Enterobacter_sp._MGH119_(enterobacteria)	Enterobacter_sp._MGH119	ftp://ftp.ncbi.nlm.nih.gov/genomes/all/GCF/001/037/675/GCF_001037675.1_Ente_cloa_complex_MGH119_V1	ftp://ftp.ncbi.nlm.nih.gov/genomes/all/GCA/001/037/675/GCA_001037675.1_Ente_cloa_complex_MGH119_V1	Broad_Institute	2015/06/22_00:00	2015/06/22_00:00	2015/06/22_00:00	2016/01/21_00:00	SAMN03280183	assembly	Enterobacter_spp	E_xiangfangensis	3	724		IncFII	absent	absent	-	absent
SAMN03495968		Homo_sapiens			Vance_Fowler		GCF_001011865.1	ASM101186v1	Contig	NA	GN02097	LDCF01	4632402	38	301987	299766	Enterobacter_hormaechei_subsp._steigerwaltii_(enterobacteria)	Enterobacter_hormaechei	ftp://ftp.ncbi.nlm.nih.gov/genomes/all/GCF/001/011/865/GCF_001011865.1_ASM101186v1	ftp://ftp.ncbi.nlm.nih.gov/genomes/all/GCA/001/011/865/GCA_001011865.1_ASM101186v1	JCVI	2015/05/21_00:00	2015/05/21_00:00	2015/05/21_00:00	2016/06/23_00:00	SAMN03495968	assembly	Enterobacter_spp	E_xiangfangensis	1	688		NA	absent	absent	-	present
SAMN08932885	Missing						GCF_003965695.1	ASM396569v1	Contig	NA	WCHLN045158	RXQL01	4633374	69	116088	1812935	Enterobacter_roggenkampii_(enterobacteria)	Enterobacter_roggenkampii	ftp://ftp.ncbi.nlm.nih.gov/genomes/all/GCF/003/965/695/GCF_003965695.1_ASM396569v1	ftp://ftp.ncbi.nlm.nih.gov/genomes/all/GCA/003/965/695/GCA_003965695.1_ASM396569v1	West_China_Hospital,_Sichuan_University	2018/12/23_00:00	2018/12/23_00:00	2018/12/23_00:00	2018/12/28_00:00	SAMN08932885	assembly	Enterobacter_spp	E_roggenkampii	#N/A	-		IncFIB_IncFII	absent	absent	-	present
SAMN04252911	Unknown	Homo_sapiens	clinical_or_host-associated_bacteria	54_years	Johann_Pitout		GCF_001472355.1	SMART_503.v1	Contig	NA	SMART_503	LPPX01	4633678	33	440422	299766	Enterobacter_hormaechei_subsp._steigerwaltii_(enterobacteria)	Enterobacter_hormaechei	ftp://ftp.ncbi.nlm.nih.gov/genomes/all/GCF/001/472/355/GCF_001472355.1_SMART_503.v1	ftp://ftp.ncbi.nlm.nih.gov/genomes/all/GCA/001/472/355/GCA_001472355.1_SMART_503.v1	JCVI	2015/12/21_00:00	2015/12/21_00:00	2015/12/21_00:00	2015/12/24_00:00	SAMN04252911	assembly	Enterobacter_spp	E_xiangfangensis	1	517		NA	absent	absent	-	present
SAMN09845205		Homo_sapiens					GCF_003594915.1	ASM359491v1	Contig	NA	90028	QZCS01	4634324	38	324936	2497875	Enterobacter_chuandaensis_(enterobacteria)	Enterobacter_chuandaensis	ftp://ftp.ncbi.nlm.nih.gov/genomes/all/GCF/003/594/915/GCF_003594915.1_ASM359491v1	ftp://ftp.ncbi.nlm.nih.gov/genomes/all/GCA/003/594/915/GCA_003594915.1_ASM359491v1	West_China_Hospital,_Sichuan_University	2018/09/25_00:00	2018/09/25_00:00	2018/09/25_00:00	2018/10/04_00:00	SAMN09845205	assembly	Enterobacter_spp	E_chuandaensis	#N/A	-	yes	IncFIB_IncFII	absent	absent	-	present
SAMN07974465	missing	Homo_sapiens	missing		Yohei_Doi		GCF_002886625.1	ASM288662v1	Contig	NA	YDC498	PGIN01	4635710	81	149496	158836	Enterobacter_hormaechei_(enterobacteria)	Enterobacter_hormaechei	ftp://ftp.ncbi.nlm.nih.gov/genomes/all/GCF/002/886/625/GCF_002886625.1_ASM288662v1	ftp://ftp.ncbi.nlm.nih.gov/genomes/all/GCA/002/886/625/GCA_002886625.1_ASM288662v1	University_of_Maryland,_School_of_Medicine	2018/01/17_00:00	2018/01/17_00:00	2018/01/17_00:00	2018/01/21_00:00	SAMN07974465	assembly	Enterobacter_spp	E_hormaechei	#N/A	269		Col_IncA/C_IncA/C2	absent	absent	blaKPC-3	absent
SAMN08737111		Homo_sapiens					GCF_003056805.1	ASM305680v1	Contig	NA	AUH-ENM5	PYHA01	4636311	60	741160	158836	Enterobacter_hormaechei_(enterobacteria)	Enterobacter_hormaechei	ftp://ftp.ncbi.nlm.nih.gov/genomes/all/GCF/003/056/805/GCF_003056805.1_ASM305680v1	ftp://ftp.ncbi.nlm.nih.gov/genomes/all/GCA/003/056/805/GCA_003056805.1_ASM305680v1	Lebanese_American_University	2018/04/18_00:00	2018/04/18_00:00	2018/04/18_00:00	2018/04/25_00:00	SAMN08737111	assembly	Enterobacter_spp	E_xiangfangensis	1	-		NA	absent	absent	-	present
SAMN04943266	feces	Bos_taurus					GCF_001641445.1	ASM164144v1	Contig	NA	KCJK1735	LXPT01	4636375	37	425203	550	Enterobacter_cloacae_(enterobacteria)	Enterobacter_cloacae	ftp://ftp.ncbi.nlm.nih.gov/genomes/all/GCF/001/641/445/GCF_001641445.1_ASM164144v1	ftp://ftp.ncbi.nlm.nih.gov/genomes/all/GCA/001/641/445/GCA_001641445.1_ASM164144v1	University_of_Florida	2016/05/10_00:00	2016/05/10_00:00	2016/05/10_00:00	2016/05/14_00:00	SAMN04943266	assembly	Enterobacter_spp	E_wuhouensis	#N/A	-		IncFIB	absent	absent	-	absent
SAMN04943309	feces	Bos_taurus					GCF_001641585.1	ASM164158v1	Contig	NA	KCJK1725	LXPZ01	4637068	40	425203	550	Enterobacter_cloacae_(enterobacteria)	Enterobacter_cloacae	ftp://ftp.ncbi.nlm.nih.gov/genomes/all/GCF/001/641/585/GCF_001641585.1_ASM164158v1	ftp://ftp.ncbi.nlm.nih.gov/genomes/all/GCA/001/641/585/GCA_001641585.1_ASM164158v1	University_of_Florida	2016/05/10_00:00	2016/05/10_00:00	2016/05/10_00:00	2016/05/14_00:00	SAMN04943309	assembly	Enterobacter_spp	E_wuhouensis	#N/A	-		IncFIB	absent	absent	-	absent
SAMN03280192	missing	Homo_sapiens	missing	missing	missing	missing	GCF_001037885.1	Ente_cloa_complex_BIDMC109_V1	Scaffold	NA	BIDMC109	LETP01	4637831	17	513945	1686400	Enterobacter_sp._BIDMC109_(enterobacteria)	Enterobacter_sp._BIDMC109	ftp://ftp.ncbi.nlm.nih.gov/genomes/all/GCF/001/037/885/GCF_001037885.1_Ente_cloa_complex_BIDMC109_V1	ftp://ftp.ncbi.nlm.nih.gov/genomes/all/GCA/001/037/885/GCA_001037885.1_Ente_cloa_complex_BIDMC109_V1	Broad_Institute	2015/06/22_00:00	2015/06/22_00:00	2015/06/22_00:00	2016/01/21_00:00	SAMN03280192	assembly	Enterobacter_spp	E_xiangfangensis	1	662		NA	absent	absent	-	present
SAMEA2273247	blood	Homo_sapiens					GCF_900077855.1	11983_7#22	Scaffold	NA	e832	FKGX01	4638215	47	212768	550	Enterobacter_cloacae_(enterobacteria)	Enterobacter_cloacae	ftp://ftp.ncbi.nlm.nih.gov/genomes/all/GCF/900/077/855/GCF_900077855.1_11983_7_22	ftp://ftp.ncbi.nlm.nih.gov/genomes/all/GCA/900/077/855/GCA_900077855.1_11983_7_22	SC	2016/04/13_00:00	2016/05/09_00:00	2016/05/09_00:00	2016/05/14_00:00	SAMEA2273247	assembly	Enterobacter_spp	E_xiangfangensis	3	295		NA	absent	absent	-	absent
SAMN00000733	human_gut	Homo_sapiens					GCF_000155995.1	ASM15599v1	Scaffold	NA	ATCC_35316	ABWM02	4638653	62	330219	500639	Enterobacter_cancerogenus_ATCC_35316_(enterobacteria)	Enterobacter_cancerogenus	ftp://ftp.ncbi.nlm.nih.gov/genomes/all/GCF/000/155/995/GCF_000155995.1_ASM15599v1	ftp://ftp.ncbi.nlm.nih.gov/genomes/all/GCA/000/155/995/GCA_000155995.1_ASM15599v1	Washington_University_Genome_Sequencing_Center	2009/10/08_00:00	2010/10/15_00:00	2010/10/15_00:00	2016/11/29_00:00	SAMN00000733	assembly	Enterobacter_spp	E_cancerogenus	#N/A	-		NA	absent	absent	-	present
SAMN11097312	soil				JTZarate		GCF_004798225.1	ASM479822v1	Contig	NA	AD2-3	SOPQ01	4639072	16	574736	2547834	Enterobacter_sp._AD2-3_(enterobacteria)	Enterobacter_sp._AD2-3	ftp://ftp.ncbi.nlm.nih.gov/genomes/all/GCF/004/798/225/GCF_004798225.1_ASM479822v1	ftp://ftp.ncbi.nlm.nih.gov/genomes/all/GCA/004/798/225/GCA_004798225.1_ASM479822v1	University_of_the_Philippines_-_Los_Banos	2019/04/16_00:00	2019/04/16_00:00	2019/04/16_00:00	2019/04/20_00:00	SAMN11097312	assembly	Enterobacter_spp	E_vonholyi	#N/A	-		NA	absent	absent	-	present
SAMN07251577	root	rice			Guishan_Zhang		GCF_003353115.1	ASM335311v1	Scaffold	NA	9-2	QQXP01	4639830	67	243375	559106	Enterobacter_sp._9-2_(enterobacteria)	Enterobacter_sp._9-2	ftp://ftp.ncbi.nlm.nih.gov/genomes/all/GCF/003/353/115/GCF_003353115.1_ASM335311v1	ftp://ftp.ncbi.nlm.nih.gov/genomes/all/GCA/003/353/115/GCA_003353115.1_ASM335311v1	Agricultural_culture_collection_of_China_(ACCC)	2018/08/01_00:00	2018/08/02_00:00	2018/08/02_00:00	2018/08/04_00:00	SAMN07251577	assembly	Enterobacter_spp	Unidentified-2	#N/A	-		NA	absent	absent	-	present
SAMN04407787	Unknown	Homo_sapiens	Bloodstream_infection		Vance_Fowler		GCF_001518625.1	ASM151862v1	Contig	NA	GN04311	LRCQ01	4640675	123	75146	299766	Enterobacter_hormaechei_subsp._steigerwaltii_(enterobacteria)	Enterobacter_hormaechei	ftp://ftp.ncbi.nlm.nih.gov/genomes/all/GCF/001/518/625/GCF_001518625.1_ASM151862v1	ftp://ftp.ncbi.nlm.nih.gov/genomes/all/GCA/001/518/625/GCA_001518625.1_ASM151862v1	JCVI	2016/01/19_00:00	2016/01/19_00:00	2016/01/19_00:00	2016/06/24_00:00	SAMN04407787	assembly	Enterobacter_spp	E_xiangfangensis	1	662		IncFIB_IncFII_IncR	absent	absent	-	present
SAMN08031325	stool	Homo_sapiens					GCF_002797275.1	ASM279727v1	Contig	NA	indica	PGWQ01	4640941	25	361032	2027919	Enterobacter_cloacae_complex_sp._(enterobacteria)	Enterobacter_cloacae_complex_sp.	ftp://ftp.ncbi.nlm.nih.gov/genomes/all/GCF/002/797/275/GCF_002797275.1_ASM279727v1	ftp://ftp.ncbi.nlm.nih.gov/genomes/all/GCA/002/797/275/GCA_002797275.1_ASM279727v1	Translational_Health_Science_and_Technology_Institute	2017/11/28_00:00	2017/11/28_00:00	2017/11/28_00:00	2017/11/30_00:00	SAMN08031325	assembly	Enterobacter_spp	E_xiangfangensis	3	127		IncFIB_IncFII	absent	absent	-	absent
SAMN02934519	rectal_Swab	Homo_sapiens	Surveillance	43D	Children's_National_Hospital		GCF_000783855.2	ASM78385v2	Contig	NA	FDAARGOS_68	JTBO02	4642123	1	4642123	158836	Enterobacter_hormaechei_(enterobacteria)	Enterobacter_hormaechei	ftp://ftp.ncbi.nlm.nih.gov/genomes/all/GCF/000/783/855/GCF_000783855.2_ASM78385v2	ftp://ftp.ncbi.nlm.nih.gov/genomes/all/GCA/000/783/855/GCA_000783855.2_ASM78385v2	University_of_Maryland_School_of_Medicine_Institute_for_Genome_Sciences_(IGS)_-_sequencing_center	2018/01/19_00:00	2018/01/19_00:00	2018/01/19_00:00	2019/01/07_00:00	SAMN02934519	assembly	Enterobacter_spp	E_xiangfangensis	1	-		NA	absent	absent	-	present
SAMN09694008	stool	Homo_sapiens	Gastrointestinal_colonization		Froedtert_Hospital		GCF_003362935.1	ASM336293v1	Contig	NA	1-RC-17-04409-1	QRBR01	4642554	101	124203	158836	Enterobacter_hormaechei_(enterobacteria)	Enterobacter_hormaechei	ftp://ftp.ncbi.nlm.nih.gov/genomes/all/GCF/003/362/935/GCF_003362935.1_ASM336293v1	ftp://ftp.ncbi.nlm.nih.gov/genomes/all/GCA/003/362/935/GCA_003362935.1_ASM336293v1	University_of_Pittsburgh_School_of_Medicine	2018/08/05_00:00	2018/08/06_00:00	2018/08/06_00:00	2019/01/08_00:00	SAMN09694008	assembly	Enterobacter_spp	E_xiangfangensis	3	407		IncN	absent	absent	blaKPC-40	absent
SAMN03160298	groin_wound	Homo_sapiens	infection		Walter_Reed_Army_Institute_of_Research		GCF_000794145.1	gdodcwi08_v01	Contig	NA	MRSN_11489	JTEP01	4643032	28	332009	1296536	Enterobacter_hormaechei_subsp._xiangfangensis_(enterobacteria)	Enterobacter_hormaechei	ftp://ftp.ncbi.nlm.nih.gov/genomes/all/GCF/000/794/145/GCF_000794145.1_gdodcwi08_v01	ftp://ftp.ncbi.nlm.nih.gov/genomes/all/GCA/000/794/145/GCA_000794145.1_gdodcwi08_v01	J._Craig_Venter_Institute	2014/12/04_00:00	2014/12/04_00:00	2014/12/04_00:00	2016/06/15_00:00	SAMN03160298	assembly	Enterobacter_spp	E_xiangfangensis	3	654		IncN_IncX4	absent	absent	blaKPC-3	absent
SAMEA2273372	blood	Homo_sapiens					GCF_900075815.1	12082_4#48	Scaffold	NA	e1527	FJZI01	4643283	34	236986	550	Enterobacter_cloacae_(enterobacteria)	Enterobacter_cloacae	ftp://ftp.ncbi.nlm.nih.gov/genomes/all/GCF/900/075/815/GCF_900075815.1_12082_4_48	ftp://ftp.ncbi.nlm.nih.gov/genomes/all/GCA/900/075/815/GCA_900075815.1_12082_4_48	SC	2016/04/04_00:00	2016/04/06_00:00	2016/04/06_00:00	2016/04/12_00:00	SAMEA2273372	assembly	Enterobacter_spp	E_bugandensis	#N/A	795		NA	absent	absent	-	present
SAMN06456256	metal						GCA_002472865.1	ASM247286v1	Scaffold	UBA7247		DKSV01	4644946	36	219609	158836	Enterobacter_hormaechei_(enterobacteria)	Enterobacter_hormaechei	NA	ftp://ftp.ncbi.nlm.nih.gov/genomes/all/GCA/002/472/865/GCA_002472865.1_ASM247286v1	University_of_Queensland	2017/10/06_00:00	2017/10/06_00:00	2017/10/06_00:00	2017/10/06_00:00	SAMN06456256	assembly	Enterobacter_spp	E_xiangfangensis	4	-		NA	absent	absent	-	absent
SAMN03495966		Homo_sapiens			Vance_Fowler		GCF_001011695.1	ASM101169v1	Contig	NA	GN02044	LDCD01	4645329	36	334752	299766	Enterobacter_hormaechei_subsp._steigerwaltii_(enterobacteria)	Enterobacter_hormaechei	ftp://ftp.ncbi.nlm.nih.gov/genomes/all/GCF/001/011/695/GCF_001011695.1_ASM101169v1	ftp://ftp.ncbi.nlm.nih.gov/genomes/all/GCA/001/011/695/GCA_001011695.1_ASM101169v1	JCVI	2015/05/21_00:00	2015/05/21_00:00	2015/05/21_00:00	2016/06/23_00:00	SAMN03495966	assembly	Enterobacter_spp	E_xiangfangensis	1	687		NA	absent	absent	-	present
SAMN10491323		Soil					GCF_004522615.1	ASM452261v1	Contig	NA	A11	RSDS01	4645333	20	558336	1217049	Enterobacter_sp._A11_(enterobacteria)	Enterobacter_sp._A11	ftp://ftp.ncbi.nlm.nih.gov/genomes/all/GCF/004/522/615/GCF_004522615.1_ASM452261v1	ftp://ftp.ncbi.nlm.nih.gov/genomes/all/GCA/004/522/615/GCA_004522615.1_ASM452261v1	Huazhong_Agricultural_University	2019/03/29_00:00	2019/03/29_00:00	2019/03/29_00:00	2019/04/01_00:00	SAMN10491323	assembly	Enterobacter_spp	Unidentified-2	#N/A	-		NA	absent	absent	-	present
SAMEA2273207	blood	Homo_sapiens					GCF_900075335.1	12045_4#78	Scaffold	NA	e1087	FJXI01	4646134	48	216072	550	Enterobacter_cloacae_(enterobacteria)	Enterobacter_cloacae	ftp://ftp.ncbi.nlm.nih.gov/genomes/all/GCF/900/075/335/GCF_900075335.1_12045_4_78	ftp://ftp.ncbi.nlm.nih.gov/genomes/all/GCA/900/075/335/GCA_900075335.1_12045_4_78	SC	2016/04/04_00:00	2016/04/06_00:00	2016/04/06_00:00	2016/04/12_00:00	SAMEA2273207	assembly	Enterobacter_spp	E_asburiae	#N/A	24		NA	absent	absent	-	present
SAMN04538166		Homo_sapiens					GCF_001617645.1	ASM161764v1	Complete_Genome	NA	ENIPBJ-CG1	NA	4648696	1	4648696	61645	Enterobacter_asburiae_(enterobacteria)	Enterobacter_asburiae	ftp://ftp.ncbi.nlm.nih.gov/genomes/all/GCF/001/617/645/GCF_001617645.1_ASM161764v1	ftp://ftp.ncbi.nlm.nih.gov/genomes/all/GCA/001/617/645/GCA_001617645.1_ASM161764v1	Institute_of_Pathogen_Biology,Chinese_Academy_Medical_Sciences_&amp;_Peking_Union_Medical_College	2016/04/08_00:00	2016/04/08_00:00	2016/04/08_00:00	2019/04/03_00:00	SAMN04538166	assembly	Enterobacter_spp	E_asburiae	#N/A	-		NA	absent	absent	-	present
SAMN08193702		Homo_sapiens					GCF_002848105.1	ASM284810v1	Scaffold	NA	UMB0660	PKJW01	4649113	41	244352	881260	Enterobacter_bugandensis_(enterobacteria)	Enterobacter_bugandensis	ftp://ftp.ncbi.nlm.nih.gov/genomes/all/GCF/002/848/105/GCF_002848105.1_ASM284810v1	ftp://ftp.ncbi.nlm.nih.gov/genomes/all/GCA/002/848/105/GCA_002848105.1_ASM284810v1	Loyola_University_Chicago	2017/12/28_00:00	2017/12/28_00:00	2017/12/28_00:00	2019/01/07_00:00	SAMN08193702	assembly	Enterobacter_spp	E_bugandensis	#N/A	718		NA	absent	absent	-	present
SAMN09229069	wastewater						GCF_003173495.1	ASM317349v1	Contig	NA	HPCN14	QGNL01	4649130	79	657154	2202832	Enterobacter_sp._HPCN14_(enterobacteria)	Enterobacter_sp._HPCN14	ftp://ftp.ncbi.nlm.nih.gov/genomes/all/GCF/003/173/495/GCF_003173495.1_ASM317349v1	ftp://ftp.ncbi.nlm.nih.gov/genomes/all/GCA/003/173/495/GCA_003173495.1_ASM317349v1	CSIR-_National_Environmental_Engineering_Research_Institute	2018/05/28_00:00	2018/05/28_00:00	2018/05/28_00:00	2018/05/31_00:00	SAMN09229069	assembly	Enterobacter_spp	E_xiangfangensis	1	742		NA	absent	absent	-	present
SAMN02138614	missing	missing					GCF_000492495.1	Ente_cloa_UCI_9_V1	Scaffold	NA	UCICRE_9	AYIG01	4650382	13	655465	1329854	Enterobacter_hormaechei_subsp._hoffmannii_UCICRE_9_(enterobacteria)	Enterobacter_hormaechei	ftp://ftp.ncbi.nlm.nih.gov/genomes/all/GCF/000/492/495/GCF_000492495.1_Ente_cloa_UCI_9_V1	ftp://ftp.ncbi.nlm.nih.gov/genomes/all/GCA/000/492/495/GCA_000492495.1_Ente_cloa_UCI_9_V1	Broad_Institute	2013/10/30_00:00	2013/10/30_00:00	2013/10/30_00:00	2014/10/09_00:00	SAMN02138614	assembly	Enterobacter_spp	E_xiangfangensis	2	683		NA	absent	absent	-	absent
SAMN05207407	biofouled_membrane				Smita_Pal		GCF_001663525.1	ASM166352v1	Scaffold	NA	EGD_AQ_BF12	LYYC01	4650456	29	239084	61645	Enterobacter_asburiae_(enterobacteria)	Enterobacter_asburiae	ftp://ftp.ncbi.nlm.nih.gov/genomes/all/GCF/001/663/525/GCF_001663525.1_ASM166352v1	ftp://ftp.ncbi.nlm.nih.gov/genomes/all/GCA/001/663/525/GCA_001663525.1_ASM166352v1	CSIR-National_Environmental_Engineering_Research_Institute_(NEERI)	2016/06/16_00:00	2016/06/16_00:00	2016/06/16_00:00	2016/06/21_00:00	SAMN05207407	assembly	Enterobacter_spp	E_asburiae	#N/A	733		NA	absent	absent	-	present
SAMN09694007	stool	Homo_sapiens	Gastrointestinal_colonization		Froedtert_Hospital		GCF_003363035.1	ASM336303v1	Contig	NA	1-RC-17-04408-5	QRBS01	4652726	144	106237	158836	Enterobacter_hormaechei_(enterobacteria)	Enterobacter_hormaechei	ftp://ftp.ncbi.nlm.nih.gov/genomes/all/GCF/003/363/035/GCF_003363035.1_ASM336303v1	ftp://ftp.ncbi.nlm.nih.gov/genomes/all/GCA/003/363/035/GCA_003363035.1_ASM336303v1	University_of_Pittsburgh_School_of_Medicine	2018/08/05_00:00	2018/08/06_00:00	2018/08/06_00:00	2019/01/08_00:00	SAMN09694007	assembly	Enterobacter_spp	E_xiangfangensis	3	407		IncN	absent	absent	blaKPC-40	absent
SAMN10523722	Unknown	Unknown	Unknown		Unknown		GCF_003970265.1	ASM397026v1	Contig	NA	59	RXYW01	4653422	31	305295	299766	Enterobacter_hormaechei_subsp._steigerwaltii_(enterobacteria)	Enterobacter_hormaechei	ftp://ftp.ncbi.nlm.nih.gov/genomes/all/GCF/003/970/265/GCF_003970265.1_ASM397026v1	ftp://ftp.ncbi.nlm.nih.gov/genomes/all/GCA/003/970/265/GCA_003970265.1_ASM397026v1	JCVI	2018/12/24_00:00	2018/12/25_00:00	2018/12/25_00:00	2018/12/28_00:00	SAMN10523722	assembly	Enterobacter_spp	E_xiangfangensis	1	-		NA	absent	absent	-	present
SAMN09380579		Zea_nicaraguensis			David_Johnston-Monje		GCF_003231255.1	ASM323125v1	Scaffold	NA	3D9	QKSC01	4653802	28	304152	1812935	Enterobacter_roggenkampii_(enterobacteria)	Enterobacter_roggenkampii	ftp://ftp.ncbi.nlm.nih.gov/genomes/all/GCF/003/231/255/GCF_003231255.1_ASM323125v1	ftp://ftp.ncbi.nlm.nih.gov/genomes/all/GCA/003/231/255/GCA_003231255.1_ASM323125v1	University_of_Guelph	2018/06/15_00:00	2018/06/15_00:00	2018/06/15_00:00	2018/06/19_00:00	SAMN09380579	assembly	Enterobacter_spp	E_roggenkampii	#N/A	732		NA	absent	absent	-	present
SAMEA2273406	blood	Homo_sapiens					GCF_900076115.1	11983_6#83	Scaffold	NA	e1719	FKAL01	4653857	46	169835	550	Enterobacter_cloacae_(enterobacteria)	Enterobacter_cloacae	ftp://ftp.ncbi.nlm.nih.gov/genomes/all/GCF/900/076/115/GCF_900076115.1_11983_6_83	ftp://ftp.ncbi.nlm.nih.gov/genomes/all/GCA/900/076/115/GCA_900076115.1_11983_6_83	SC	2016/04/13_00:00	2016/05/09_00:00	2016/05/09_00:00	2016/05/14_00:00	SAMEA2273406	assembly	Enterobacter_spp	E_xiangfangensis	3	798		NA	absent	absent	-	absent
SAMN08193737		Homo_sapiens					GCF_002860705.1	ASM286070v1	Scaffold	NA	UMB0819	PKHV01	4654361	21	529935	881260	Enterobacter_bugandensis_(enterobacteria)	Enterobacter_bugandensis	ftp://ftp.ncbi.nlm.nih.gov/genomes/all/GCF/002/860/705/GCF_002860705.1_ASM286070v1	ftp://ftp.ncbi.nlm.nih.gov/genomes/all/GCA/002/860/705/GCA_002860705.1_ASM286070v1	Loyola_University_Chicago	2017/12/28_00:00	2018/01/04_00:00	2018/01/04_00:00	2019/01/07_00:00	SAMN08193737	assembly	Enterobacter_spp	E_bugandensis	#N/A	718		NA	absent	absent	-	present
SAMEA2273348	blood	Homo_sapiens					GCF_900075645.1	11983_6#27	Scaffold	NA	e1408	FJYS01	4654557	27	359906	550	Enterobacter_cloacae_(enterobacteria)	Enterobacter_cloacae	ftp://ftp.ncbi.nlm.nih.gov/genomes/all/GCF/900/075/645/GCF_900075645.1_11983_6_27	ftp://ftp.ncbi.nlm.nih.gov/genomes/all/GCA/900/075/645/GCA_900075645.1_11983_6_27	SC	2016/04/04_00:00	2016/04/06_00:00	2016/04/06_00:00	2016/04/08_00:00	SAMEA2273348	assembly	Enterobacter_spp	E_xiangfangensis	1	782		NA	absent	absent	-	present
SAMEA2273243	blood	Homo_sapiens					GCF_900077805.1	11983_7#18	Scaffold	NA	e812	FKGS01	4655111	55	223098	550	Enterobacter_cloacae_(enterobacteria)	Enterobacter_cloacae	ftp://ftp.ncbi.nlm.nih.gov/genomes/all/GCF/900/077/805/GCF_900077805.1_11983_7_18	ftp://ftp.ncbi.nlm.nih.gov/genomes/all/GCA/900/077/805/GCA_900077805.1_11983_7_18	SC	2016/04/13_00:00	2016/05/09_00:00	2016/05/09_00:00	2016/05/14_00:00	SAMEA2273243	assembly	Enterobacter_spp	E_xiangfangensis	3	120		FIA_IncFIA_repA	absent	absent	-	absent
SAMEA2273405	blood	Homo_sapiens					GCF_900076105.1	11983_6#82	Scaffold	NA	e1718	FKAK01	4655869	50	187211	550	Enterobacter_cloacae_(enterobacteria)	Enterobacter_cloacae	ftp://ftp.ncbi.nlm.nih.gov/genomes/all/GCF/900/076/105/GCF_900076105.1_11983_6_82	ftp://ftp.ncbi.nlm.nih.gov/genomes/all/GCA/900/076/105/GCA_900076105.1_11983_6_82	SC	2016/04/13_00:00	2016/05/09_00:00	2016/05/09_00:00	2016/05/14_00:00	SAMEA2273405	assembly	Enterobacter_spp	E_xiangfangensis	3	798		NA	absent	absent	-	absent
SAMN03196999	missing	Homo_sapiens	missing		UW_clinical_laboratory		GCF_001053635.1	ASM105363v1	Scaffold	NA	1034_ECLO	JWFJ01	4656094	154	80191	208224	Enterobacter_kobei_(enterobacteria)	Enterobacter_kobei	ftp://ftp.ncbi.nlm.nih.gov/genomes/all/GCF/001/053/635/GCF_001053635.1_ASM105363v1	ftp://ftp.ncbi.nlm.nih.gov/genomes/all/GCA/001/053/635/GCA_001053635.1_ASM105363v1	University_of_Washington	2015/07/10_00:00	2015/07/10_00:00	2015/07/10_00:00	2019/01/07_00:00	SAMN03196999	assembly	Enterobacter_spp	E_kobei	#N/A	3		NA	absent	absent	-	present
SAMN03280175	missing	Homo_sapiens	missing	missing	missing	missing	GCF_001030195.1	Ente_cloa_UCI85_V1	Scaffold	NA	UCI85	LESZ01	4657714	13	2460599	158836	Enterobacter_hormaechei_(enterobacteria)	Enterobacter_hormaechei	ftp://ftp.ncbi.nlm.nih.gov/genomes/all/GCF/001/030/195/GCF_001030195.1_Ente_cloa_UCI85_V1	ftp://ftp.ncbi.nlm.nih.gov/genomes/all/GCA/001/030/195/GCA_001030195.1_Ente_cloa_UCI85_V1	Broad_Institute	2015/06/22_00:00	2015/06/22_00:00	2015/06/22_00:00	2018/11/14_00:00	SAMN03280175	assembly	Enterobacter_spp	E_xiangfangensis	3	805		IncR	absent	absent	-	absent
SAMN03732701	bodily_fluid	Homo_sapiens			Vance_Fowler		GCF_001022335.1	ASM102233v1	Contig	NA	GN02377	LEEB01	4657978	37	289370	299766	Enterobacter_hormaechei_subsp._steigerwaltii_(enterobacteria)	Enterobacter_hormaechei	ftp://ftp.ncbi.nlm.nih.gov/genomes/all/GCF/001/022/335/GCF_001022335.1_ASM102233v1	ftp://ftp.ncbi.nlm.nih.gov/genomes/all/GCA/001/022/335/GCA_001022335.1_ASM102233v1	JCVI	2015/06/09_00:00	2015/06/09_00:00	2015/06/09_00:00	2016/06/23_00:00	SAMN03732701	assembly	Enterobacter_spp	E_xiangfangensis	1	697		NA	absent	absent	-	present
SAMN03197015	missing	Homo_sapiens	missing		UW_clinical_laboratory		GCF_001053725.1	ASM105372v1	Contig	NA	1049_ECLO	JWET01	4658133	101	173019	208224	Enterobacter_kobei_(enterobacteria)	Enterobacter_kobei	ftp://ftp.ncbi.nlm.nih.gov/genomes/all/GCF/001/053/725/GCF_001053725.1_ASM105372v1	ftp://ftp.ncbi.nlm.nih.gov/genomes/all/GCA/001/053/725/GCA_001053725.1_ASM105372v1	University_of_Washington	2015/07/10_00:00	2015/07/10_00:00	2015/07/10_00:00	2019/01/07_00:00	SAMN03197015	assembly	Enterobacter_spp	E_kobei	#N/A	3		NA	absent	absent	-	present
SAMEA104694377	faecal	Homo_sapiens					GCA_902164575.1	25964_2#254	Scaffold	NA	4928STDY7387740	CABHDQ01	4659311	35	493052	550	Enterobacter_cloacae_(enterobacteria)	Enterobacter_cloacae	NA	ftp://ftp.ncbi.nlm.nih.gov/genomes/all/GCA/902/164/575/GCA_902164575.1_25964_2_254	SC	2019/07/11_00:00	2019/07/12_00:00	2019/07/12_00:00	2019/07/12_00:00	SAMEA104694377	assembly	Enterobacter_spp	E_xiangfangensis	2	145		NA	absent	absent	-	absent
SAMN03333155	urine	Homo_sapiens	Not_available		missing		GCF_000952375.1	ASM95237v1	Scaffold	NA	MNCRE12	JYME01	4659452	61	184298	208224	Enterobacter_kobei_(enterobacteria)	Enterobacter_kobei	ftp://ftp.ncbi.nlm.nih.gov/genomes/all/GCF/000/952/375/GCF_000952375.1_ASM95237v1	ftp://ftp.ncbi.nlm.nih.gov/genomes/all/GCA/000/952/375/GCA_000952375.1_ASM95237v1	University_of_Minnesota	2015/03/13_00:00	2015/03/13_00:00	2015/03/13_00:00	2019/01/07_00:00	SAMN03333155	assembly	Enterobacter_spp	E_kobei	#N/A	731		NA	absent	absent	-	present
SAMN10524999	rectal_swab	Homo_sapiens					GCF_003964435.1	ASM396443v1	Contig	NA	WCHEX016162	RXSG01	4659612	79	223768	1296536	Enterobacter_hormaechei_subsp._xiangfangensis_(enterobacteria)	Enterobacter_hormaechei	ftp://ftp.ncbi.nlm.nih.gov/genomes/all/GCF/003/964/435/GCF_003964435.1_ASM396443v1	ftp://ftp.ncbi.nlm.nih.gov/genomes/all/GCA/003/964/435/GCA_003964435.1_ASM396443v1	West_China_Hospital,_Sichuan_University	2018/12/23_00:00	2018/12/23_00:00	2018/12/23_00:00	2018/12/28_00:00	SAMN10524999	assembly	Enterobacter_spp	E_xiangfangensis	3	171		FIA_IncFIA_IncR_IncX3	absent	absent	blaNDM-5	absent
SAMN03333157	urine	Homo_sapiens	Not_available		missing		GCF_000952315.1	ASM95231v1	Scaffold	NA	MNCRE15	JYMG01	4660478	56	157517	158836	Enterobacter_hormaechei_(enterobacteria)	Enterobacter_hormaechei	ftp://ftp.ncbi.nlm.nih.gov/genomes/all/GCF/000/952/315/GCF_000952315.1_ASM95231v1	ftp://ftp.ncbi.nlm.nih.gov/genomes/all/GCA/000/952/315/GCA_000952315.1_ASM95231v1	University_of_Minnesota	2015/03/13_00:00	2015/03/13_00:00	2015/03/13_00:00	2019/01/07_00:00	SAMN03333157	assembly	Enterobacter_spp	E_xiangfangensis	1	106		NA	absent	absent	-	present
SAMEA2273341	blood	Homo_sapiens					GCF_900075595.1	11983_6#20	Scaffold	NA	e1347	FJYL01	4660624	48	156596	550	Enterobacter_cloacae_(enterobacteria)	Enterobacter_cloacae	ftp://ftp.ncbi.nlm.nih.gov/genomes/all/GCF/900/075/595/GCF_900075595.1_11983_6_20	ftp://ftp.ncbi.nlm.nih.gov/genomes/all/GCA/900/075/595/GCA_900075595.1_11983_6_20	SC	2016/04/04_00:00	2016/04/06_00:00	2016/04/06_00:00	2016/04/12_00:00	SAMEA2273341	assembly	Enterobacter_spp	E_xiangfangensis	2	792		NA	absent	absent	-	absent
SAMEA2273370	blood	Homo_sapiens					GCF_900075375.1	11983_6#51	Scaffold	NA	e1272	FJXV01	4660814	33	300186	550	Enterobacter_cloacae_(enterobacteria)	Enterobacter_cloacae	ftp://ftp.ncbi.nlm.nih.gov/genomes/all/GCF/900/075/375/GCF_900075375.1_11983_6_51	ftp://ftp.ncbi.nlm.nih.gov/genomes/all/GCA/900/075/375/GCA_900075375.1_11983_6_51	SC	2016/04/04_00:00	2016/04/06_00:00	2016/04/06_00:00	2016/04/18_00:00	SAMEA2273370	assembly	Enterobacter_spp	E_xiangfangensis	1	116		NA	absent	absent	-	present
SAMN09845185		Homo_sapiens					GCF_003986815.1	ASM398681v1	Contig	NA	WCHEH090007	RXQR01	4661674	44	372886	158836	Enterobacter_hormaechei_(enterobacteria)	Enterobacter_hormaechei	ftp://ftp.ncbi.nlm.nih.gov/genomes/all/GCF/003/986/815/GCF_003986815.1_ASM398681v1	ftp://ftp.ncbi.nlm.nih.gov/genomes/all/GCA/003/986/815/GCA_003986815.1_ASM398681v1	West_China_Hospital,_Sichuan_University	2018/12/23_00:00	2018/12/31_00:00	2018/12/31_00:00	2019/01/02_00:00	SAMN09845185	assembly	Enterobacter_spp	E_xiangfangensis	1	-		NA	absent	absent	-	present
SAMN05581746	missing	Homo_sapiens	missing		missing		GCF_001729785.1	ASM172978v1	Complete_Genome	NA	LMG27195	NA	4661849	1	4661849	1296536	Enterobacter_hormaechei_subsp._xiangfangensis_(enterobacteria)	Enterobacter_hormaechei	ftp://ftp.ncbi.nlm.nih.gov/genomes/all/GCF/001/729/785/GCF_001729785.1_ASM172978v1	ftp://ftp.ncbi.nlm.nih.gov/genomes/all/GCA/001/729/785/GCA_001729785.1_ASM172978v1	JCVI	2016/09/16_00:00	2016/09/16_00:00	2016/09/16_00:00	2016/09/19_00:00	SAMN05581746	assembly	Enterobacter_spp	E_xiangfangensis	3	544	yes	NA	absent	absent	-	absent
SAMN03732689	bodily_fluid	Homo_sapiens			Vance_Fowler		GCF_001023225.1	ASM102322v1	Contig	NA	GN02227	LEEN01	4662454	25	468810	299766	Enterobacter_hormaechei_subsp._steigerwaltii_(enterobacteria)	Enterobacter_hormaechei	ftp://ftp.ncbi.nlm.nih.gov/genomes/all/GCF/001/023/225/GCF_001023225.1_ASM102322v1	ftp://ftp.ncbi.nlm.nih.gov/genomes/all/GCA/001/023/225/GCA_001023225.1_ASM102322v1	JCVI	2015/06/09_00:00	2015/06/09_00:00	2015/06/09_00:00	2016/06/24_00:00	SAMN03732689	assembly	Enterobacter_spp	E_xiangfangensis	1	693		NA	absent	absent	-	present
SAMN09845225		Homo_sapiens					GCF_003964505.1	ASM396450v1	Contig	NA	WCHEH090060	RXSD01	4662988	47	391887	158836	Enterobacter_hormaechei_(enterobacteria)	Enterobacter_hormaechei	ftp://ftp.ncbi.nlm.nih.gov/genomes/all/GCF/003/964/505/GCF_003964505.1_ASM396450v1	ftp://ftp.ncbi.nlm.nih.gov/genomes/all/GCA/003/964/505/GCA_003964505.1_ASM396450v1	West_China_Hospital,_Sichuan_University	2018/12/23_00:00	2018/12/23_00:00	2018/12/23_00:00	2018/12/28_00:00	SAMN09845225	assembly	Enterobacter_spp	E_xiangfangensis	1	550		IncFIA_IncFIB_IncFII	absent	absent	-	present
SAMN10248969	alcohol_foam_dispenser_in_hospital_intensive_care_unit						GCF_003937905.1	ASM393790v1	Scaffold	NA	EH_183	RHUQ01	4664555	74	128419	158836	Enterobacter_hormaechei_(enterobacteria)	Enterobacter_hormaechei	ftp://ftp.ncbi.nlm.nih.gov/genomes/all/GCF/003/937/905/GCF_003937905.1_ASM393790v1	ftp://ftp.ncbi.nlm.nih.gov/genomes/all/GCA/003/937/905/GCA_003937905.1_ASM393790v1	Washington_University_in_St._Louis_School_of_Medicine	2018/12/11_00:00	2018/12/12_00:00	2018/12/12_00:00	2018/12/14_00:00	SAMN10248969	assembly	Enterobacter_spp	E_xiangfangensis	3	270		FIA_IncFIA_IncR	absent	absent	-	absent
SAMN10249150	nursing_call_button_in_hospital_intensive_care_unit						GCF_003936525.1	ASM393652v1	Scaffold	NA	EH_279	RHUP01	4665622	73	122761	158836	Enterobacter_hormaechei_(enterobacteria)	Enterobacter_hormaechei	ftp://ftp.ncbi.nlm.nih.gov/genomes/all/GCF/003/936/525/GCF_003936525.1_ASM393652v1	ftp://ftp.ncbi.nlm.nih.gov/genomes/all/GCA/003/936/525/GCA_003936525.1_ASM393652v1	Washington_University_in_St._Louis_School_of_Medicine	2018/12/11_00:00	2018/12/12_00:00	2018/12/12_00:00	2018/12/14_00:00	SAMN10249150	assembly	Enterobacter_spp	E_xiangfangensis	3	-		FIA_IncFIA_IncR	absent	absent	-	absent
SAMEA2273204	blood	Homo_sapiens					GCF_900077515.1	12045_4#75	Scaffold	NA	e633	FKFN01	4665747	101	181829	550	Enterobacter_cloacae_(enterobacteria)	Enterobacter_cloacae	ftp://ftp.ncbi.nlm.nih.gov/genomes/all/GCF/900/077/515/GCF_900077515.1_12045_4_75	ftp://ftp.ncbi.nlm.nih.gov/genomes/all/GCA/900/077/515/GCA_900077515.1_12045_4_75	SC	2016/04/13_00:00	2016/05/09_00:00	2016/05/09_00:00	2016/05/14_00:00	SAMEA2273204	assembly	Enterobacter_spp	E_xiangfangensis	4	108		IncFIB_IncFII	absent	absent	-	absent
SAMEA2273261	blood	Homo_sapiens					GCF_900077975.1	11983_7#36	Scaffold	NA	e894	FKHM01	4667352	75	188361	550	Enterobacter_cloacae_(enterobacteria)	Enterobacter_cloacae	ftp://ftp.ncbi.nlm.nih.gov/genomes/all/GCF/900/077/975/GCF_900077975.1_11983_7_36	ftp://ftp.ncbi.nlm.nih.gov/genomes/all/GCA/900/077/975/GCA_900077975.1_11983_7_36	SC	2016/04/13_00:00	2016/05/09_00:00	2016/05/09_00:00	2016/05/14_00:00	SAMEA2273261	assembly	Enterobacter_spp	E_xiangfangensis	4	108		IncFIB_IncFII	absent	absent	-	absent
SAMN03732725	bodily_fluid	Homo_sapiens			Vance_Fowler		GCF_001022835.1	ASM102283v1	Contig	NA	GN02767	LEDG01	4668469	28	410780	299766	Enterobacter_hormaechei_subsp._steigerwaltii_(enterobacteria)	Enterobacter_hormaechei	ftp://ftp.ncbi.nlm.nih.gov/genomes/all/GCF/001/022/835/GCF_001022835.1_ASM102283v1	ftp://ftp.ncbi.nlm.nih.gov/genomes/all/GCA/001/022/835/GCA_001022835.1_ASM102283v1	JCVI	2015/06/09_00:00	2015/06/09_00:00	2015/06/09_00:00	2016/06/24_00:00	SAMN03732725	assembly	Enterobacter_spp	E_xiangfangensis	1	705		NA	absent	absent	-	present
SAMN03135879							GCF_001887225.1	ASM188722v1	Contig	NA	BH-18	JSVH01	4669180	216	36615	208224	Enterobacter_kobei_(enterobacteria)	Enterobacter_kobei	ftp://ftp.ncbi.nlm.nih.gov/genomes/all/GCF/001/887/225/GCF_001887225.1_ASM188722v1	ftp://ftp.ncbi.nlm.nih.gov/genomes/all/GCA/001/887/225/GCA_001887225.1_ASM188722v1	Tianjin_University_of_Science_and_Technology	2016/11/29_00:00	2016/11/29_00:00	2016/11/29_00:00	2016/12/03_00:00	SAMN03135879	assembly	Enterobacter_spp	E_kobei	#N/A	-		NA	absent	absent	-	present
SAMN10525015	surface						GCF_003964235.1	ASM396423v1	Contig	NA	WCHEX090077	RXSU01	4669266	67	228276	1296536	Enterobacter_hormaechei_subsp._xiangfangensis_(enterobacteria)	Enterobacter_hormaechei	ftp://ftp.ncbi.nlm.nih.gov/genomes/all/GCF/003/964/235/GCF_003964235.1_ASM396423v1	ftp://ftp.ncbi.nlm.nih.gov/genomes/all/GCA/003/964/235/GCA_003964235.1_ASM396423v1	West_China_Hospital,_Sichuan_University	2018/12/23_00:00	2018/12/23_00:00	2018/12/23_00:00	2018/12/28_00:00	SAMN10525015	assembly	Enterobacter_spp	E_xiangfangensis	3	171		IncX3	absent	absent	blaNDM-1	absent
SAMN03283678	Unknown	Unknown	Unknown		Barry_Kreiswirth		GCF_000958005.1	ASM95800v1	Contig	NA	35415	JZZJ01	4669561	28	275934	299766	Enterobacter_hormaechei_subsp._steigerwaltii_(enterobacteria)	Enterobacter_hormaechei	ftp://ftp.ncbi.nlm.nih.gov/genomes/all/GCF/000/958/005/GCF_000958005.1_ASM95800v1	ftp://ftp.ncbi.nlm.nih.gov/genomes/all/GCA/000/958/005/GCA_000958005.1_ASM95800v1	JCVI	2015/03/19_00:00	2015/03/19_00:00	2015/03/19_00:00	2016/06/23_00:00	SAMN03283678	assembly	Enterobacter_spp	E_xiangfangensis	1	49		NA	absent	absent	-	present
SAMN09845181		Homo_sapiens					GCF_003964995.1	ASM396499v1	Contig	NA	WCHEH090003	RXQN01	4669570	68	169875	158836	Enterobacter_hormaechei_(enterobacteria)	Enterobacter_hormaechei	ftp://ftp.ncbi.nlm.nih.gov/genomes/all/GCF/003/964/995/GCF_003964995.1_ASM396499v1	ftp://ftp.ncbi.nlm.nih.gov/genomes/all/GCA/003/964/995/GCA_003964995.1_ASM396499v1	West_China_Hospital,_Sichuan_University	2018/12/23_00:00	2018/12/23_00:00	2018/12/23_00:00	2018/12/28_00:00	SAMN09845181	assembly	Enterobacter_spp	E_hormaechei	#N/A	696		FIA_IncFIA_IncFIB	absent	absent	-	absent
SAMN08932716	Missing						GCF_003986725.1	ASM398672v1	Contig	NA	WCHEA045073	RXPW01	4669795	26	632552	61645	Enterobacter_asburiae_(enterobacteria)	Enterobacter_asburiae	ftp://ftp.ncbi.nlm.nih.gov/genomes/all/GCF/003/986/725/GCF_003986725.1_ASM398672v1	ftp://ftp.ncbi.nlm.nih.gov/genomes/all/GCA/003/986/725/GCA_003986725.1_ASM398672v1	West_China_Hospital,_Sichuan_University	2018/12/23_00:00	2018/12/31_00:00	2018/12/31_00:00	2019/01/02_00:00	SAMN08932716	assembly	Enterobacter_spp	E_asburiae	#N/A	-		NA	absent	absent	-	present
SAMN09845184		Homo_sapiens					GCF_003986805.1	ASM398680v1	Contig	NA	WCHEH090006	RXQQ01	4670364	72	263568	158836	Enterobacter_hormaechei_(enterobacteria)	Enterobacter_hormaechei	ftp://ftp.ncbi.nlm.nih.gov/genomes/all/GCF/003/986/805/GCF_003986805.1_ASM398680v1	ftp://ftp.ncbi.nlm.nih.gov/genomes/all/GCA/003/986/805/GCA_003986805.1_ASM398680v1	West_China_Hospital,_Sichuan_University	2018/12/23_00:00	2018/12/31_00:00	2018/12/31_00:00	2019/01/02_00:00	SAMN09845184	assembly	Enterobacter_spp	E_xiangfangensis	1	-		NA	absent	absent	-	present
SAMEA104113921							GCF_900185925.1	Enterobacter_xiangfangensis_LMG_27195T_ERS954914	Contig	Enterobacter_xiangfangensis_LMG_27195T		FYBF01	4671068	138	413887	1296536	Enterobacter_hormaechei_subsp._xiangfangensis_(enterobacteria)	Enterobacter_hormaechei	ftp://ftp.ncbi.nlm.nih.gov/genomes/all/GCF/900/185/925/GCF_900185925.1_Enterobacter_xiangfangensis_LMG_27195T_ERS954914	ftp://ftp.ncbi.nlm.nih.gov/genomes/all/GCA/900/185/925/GCA_900185925.1_Enterobacter_xiangfangensis_LMG_27195T_ERS954914	JUSTUS_LIEBIG_UNIVERSITY	2017/06/15_00:00	2017/06/16_00:00	2017/06/16_00:00	2017/06/21_00:00	SAMEA104113921	assembly	Enterobacter_spp	E_xiangfangensis	3	544		NA	absent	absent	-	absent
SAMN02597271							GCF_000515295.1	ASM51529v1	Scaffold	NA	IIT-BT_08	AZXO01	4672040	13	684965	881260	Enterobacter_bugandensis_(enterobacteria)	Enterobacter_bugandensis	ftp://ftp.ncbi.nlm.nih.gov/genomes/all/GCF/000/515/295/GCF_000515295.1_ASM51529v1	ftp://ftp.ncbi.nlm.nih.gov/genomes/all/GCA/000/515/295/GCA_000515295.1_ASM51529v1	JGI	2014/01/07_00:00	2014/01/07_00:00	2014/01/07_00:00	2019/04/22_00:00	SAMN02597271	assembly	Enterobacter_spp	E_bugandensis	#N/A	718		NA	absent	absent	-	present
SAMEA2273263	blood	Homo_sapiens					GCF_900078015.1	11983_7#38	Scaffold	NA	e903	FKHO01	4672182	25	285394	550	Enterobacter_cloacae_(enterobacteria)	Enterobacter_cloacae	ftp://ftp.ncbi.nlm.nih.gov/genomes/all/GCF/900/078/015/GCF_900078015.1_11983_7_38	ftp://ftp.ncbi.nlm.nih.gov/genomes/all/GCA/900/078/015/GCA_900078015.1_11983_7_38	SC	2016/04/13_00:00	2016/05/09_00:00	2016/05/09_00:00	2016/05/14_00:00	SAMEA2273263	assembly	Enterobacter_spp	E_xiangfangensis	1	782		NA	absent	absent	-	present
SAMN03283690	Unknown	Unknown	Unknown		Barry_Kreiswirth		GCF_000958365.1	ASM95836v1	Contig	NA	44527	JZXV01	4673285	73	167062	1296536	Enterobacter_hormaechei_subsp._xiangfangensis_(enterobacteria)	Enterobacter_hormaechei	ftp://ftp.ncbi.nlm.nih.gov/genomes/all/GCF/000/958/365/GCF_000958365.1_ASM95836v1	ftp://ftp.ncbi.nlm.nih.gov/genomes/all/GCA/000/958/365/GCA_000958365.1_ASM95836v1	JCVI	2015/03/19_00:00	2015/03/19_00:00	2015/03/19_00:00	2018/10/11_00:00	SAMN03283690	assembly	Enterobacter_spp	E_xiangfangensis	3	182		IncFIB_IncFII	absent	absent	-	absent
SAMN03197830	missing	Homo_sapiens	missing		UW_clinical_laboratory		GCF_001057735.1	ASM105773v1	Scaffold	NA	63_ECLO	JUZK01	4674582	52	175385	208224	Enterobacter_kobei_(enterobacteria)	Enterobacter_kobei	ftp://ftp.ncbi.nlm.nih.gov/genomes/all/GCF/001/057/735/GCF_001057735.1_ASM105773v1	ftp://ftp.ncbi.nlm.nih.gov/genomes/all/GCA/001/057/735/GCA_001057735.1_ASM105773v1	University_of_Washington	2015/07/10_00:00	2015/07/10_00:00	2015/07/10_00:00	2019/01/07_00:00	SAMN03197830	assembly	Enterobacter_spp	E_kobei	#N/A	56		NA	absent	absent	-	present
SAMN03732730	bodily_fluid	Homo_sapiens			Vance_Fowler		GCF_001022935.1	ASM102293v1	Contig	NA	GN03041	LEDB01	4675634	33	360403	299766	Enterobacter_hormaechei_subsp._steigerwaltii_(enterobacteria)	Enterobacter_hormaechei	ftp://ftp.ncbi.nlm.nih.gov/genomes/all/GCF/001/022/935/GCF_001022935.1_ASM102293v1	ftp://ftp.ncbi.nlm.nih.gov/genomes/all/GCA/001/022/935/GCA_001022935.1_ASM102293v1	JCVI	2015/06/09_00:00	2015/06/09_00:00	2015/06/09_00:00	2016/06/24_00:00	SAMN03732730	assembly	Enterobacter_spp	E_xiangfangensis	1	517		IncFIB_IncFII	absent	absent	-	present
SAMEA3138871							GCA_000530005.1	ISC8v1	Contig	NA	ISC8	CBWO01	4676748	348	25333	1432556	Enterobacter_cloacae_ISC8_(enterobacteria)	Enterobacter_cloacae	NA	ftp://ftp.ncbi.nlm.nih.gov/genomes/all/GCA/000/530/005/GCA_000530005.1_ISC8v1	AIT	2014/01/07_00:00	2014/02/03_00:00	2014/02/03_00:00	2014/02/03_00:00	SAMEA3138871	assembly	Enterobacter_spp	E_xiangfangensis	3	114		IncFIB	absent	absent	-	absent
SAMN10525004	pus	Homo_sapiens					GCF_003964385.1	ASM396438v1	Contig	NA	WCHEX090063	RXSK01	4678060	28	460213	1296536	Enterobacter_hormaechei_subsp._xiangfangensis_(enterobacteria)	Enterobacter_hormaechei	ftp://ftp.ncbi.nlm.nih.gov/genomes/all/GCF/003/964/385/GCF_003964385.1_ASM396438v1	ftp://ftp.ncbi.nlm.nih.gov/genomes/all/GCA/003/964/385/GCA_003964385.1_ASM396438v1	West_China_Hospital,_Sichuan_University	2018/12/23_00:00	2018/12/23_00:00	2018/12/23_00:00	2018/12/28_00:00	SAMN10525004	assembly	Enterobacter_spp	E_xiangfangensis	1	335		NA	absent	absent	-	present
SAMEA2273165	blood	Homo_sapiens					GCF_900077115.1	12045_4#41	Scaffold	NA	e432	FKEB01	4678247	62	202191	550	Enterobacter_cloacae_(enterobacteria)	Enterobacter_cloacae	ftp://ftp.ncbi.nlm.nih.gov/genomes/all/GCF/900/077/115/GCF_900077115.1_12045_4_41	ftp://ftp.ncbi.nlm.nih.gov/genomes/all/GCA/900/077/115/GCA_900077115.1_12045_4_41	SC	2016/04/13_00:00	2016/05/09_00:00	2016/05/09_00:00	2016/05/12_00:00	SAMEA2273165	assembly	Enterobacter_spp	E_xiangfangensis	1	93		IncR	absent	absent	-	present
SAMN05581748	missing	Homo_sapiens	missing		missing		GCF_001729745.1	ASM172974v1	Complete_Genome	NA	DSM_14563	NA	4678566	2	4546962	1812934	Enterobacter_hormaechei_subsp._hoffmannii_(enterobacteria)	Enterobacter_hormaechei	ftp://ftp.ncbi.nlm.nih.gov/genomes/all/GCF/001/729/745/GCF_001729745.1_ASM172974v1	ftp://ftp.ncbi.nlm.nih.gov/genomes/all/GCA/001/729/745/GCA_001729745.1_ASM172974v1	JCVI	2016/09/16_00:00	2016/09/16_00:00	2016/09/16_00:00	2016/09/19_00:00	SAMN05581748	assembly	Enterobacter_spp	E_xiangfangensis	2	816	yes	IncFIB_IncFII	absent	absent	-	absent
SAMN04407782	Unknown	Homo_sapiens	Bloodstream_infection		Vance_Fowler		GCF_001518315.1	ASM151831v1	Contig	NA	GN03842	LRCL01	4678864	124	54942	881260	Enterobacter_bugandensis_(enterobacteria)	Enterobacter_bugandensis	ftp://ftp.ncbi.nlm.nih.gov/genomes/all/GCF/001/518/315/GCF_001518315.1_ASM151831v1	ftp://ftp.ncbi.nlm.nih.gov/genomes/all/GCA/001/518/315/GCA_001518315.1_ASM151831v1	JCVI	2016/01/19_00:00	2016/01/19_00:00	2016/01/19_00:00	2016/07/19_00:00	SAMN04407782	assembly	Enterobacter_spp	E_bugandensis	#N/A	791		NA	absent	absent	-	present
SAMN07571739	pus	Homo_sapiens	suppuration		Centre_Hospitalier_Sylvanus_Olympio		GCF_002885835.1	ASM288583v1	Contig	NA	451	NSIZ01	4679775	115	99748	550	Enterobacter_cloacae_(enterobacteria)	Enterobacter_cloacae	ftp://ftp.ncbi.nlm.nih.gov/genomes/all/GCF/002/885/835/GCF_002885835.1_ASM288583v1	ftp://ftp.ncbi.nlm.nih.gov/genomes/all/GCA/002/885/835/GCA_002885835.1_ASM288583v1	Universite_de_Lome	2018/01/16_00:00	2018/01/16_00:00	2018/01/16_00:00	2018/01/21_00:00	SAMN07571739	assembly	Enterobacter_spp	E_wuhouensis	#N/A	-		IncFIB	absent	absent	-	absent
SAMN04407775	Unknown	Homo_sapiens	Bloodstream_infection		Vance_Fowler		GCF_001518195.1	ASM151819v1	Contig	NA	GN03556	LRCH01	4680205	157	49749	1296536	Enterobacter_hormaechei_subsp._xiangfangensis_(enterobacteria)	Enterobacter_hormaechei	ftp://ftp.ncbi.nlm.nih.gov/genomes/all/GCF/001/518/195/GCF_001518195.1_ASM151819v1	ftp://ftp.ncbi.nlm.nih.gov/genomes/all/GCA/001/518/195/GCA_001518195.1_ASM151819v1	JCVI	2016/01/19_00:00	2016/01/19_00:00	2016/01/19_00:00	2018/10/10_00:00	SAMN04407775	assembly	Enterobacter_spp	E_xiangfangensis	3	-		NA	absent	absent	-	absent
SAMN09235818	unknown	Homo_sapiens			JAB		GCF_003173065.1	ASM317306v1	Scaffold	NA	MER	QGLV01	4680247	172	62382	208224	Enterobacter_kobei_(enterobacteria)	Enterobacter_kobei	ftp://ftp.ncbi.nlm.nih.gov/genomes/all/GCF/003/173/065/GCF_003173065.1_ASM317306v1	ftp://ftp.ncbi.nlm.nih.gov/genomes/all/GCA/003/173/065/GCA_003173065.1_ASM317306v1	CHU_de_Bicetre	2018/05/27_00:00	2018/05/27_00:00	2018/05/27_00:00	2018/05/31_00:00	SAMN09235818	assembly	Enterobacter_spp	E_kobei	#N/A	125		NA	absent	absent	-	present
SAMN03197810	missing	Homo_sapiens	missing		UW_clinical_laboratory		GCF_001057545.1	ASM105754v1	Scaffold	NA	61_ECLO	JVAE01	4680320	55	180270	208224	Enterobacter_kobei_(enterobacteria)	Enterobacter_kobei	ftp://ftp.ncbi.nlm.nih.gov/genomes/all/GCF/001/057/545/GCF_001057545.1_ASM105754v1	ftp://ftp.ncbi.nlm.nih.gov/genomes/all/GCA/001/057/545/GCA_001057545.1_ASM105754v1	University_of_Washington	2015/07/10_00:00	2015/07/10_00:00	2015/07/10_00:00	2019/01/07_00:00	SAMN03197810	assembly	Enterobacter_spp	E_kobei	#N/A	56		NA	absent	absent	-	present
SAMEA2273143	blood	Homo_sapiens					GCF_900076845.1	12082_4#38	Scaffold	NA	e289	FKDJ01	4680777	66	293388	550	Enterobacter_cloacae_(enterobacteria)	Enterobacter_cloacae	ftp://ftp.ncbi.nlm.nih.gov/genomes/all/GCF/900/076/845/GCF_900076845.1_12082_4_38	ftp://ftp.ncbi.nlm.nih.gov/genomes/all/GCA/900/076/845/GCA_900076845.1_12082_4_38	SC	2016/04/13_00:00	2016/05/09_00:00	2016/05/09_00:00	2016/05/14_00:00	SAMEA2273143	assembly	Enterobacter_spp	E_xiangfangensis	4	108		IncFIB_IncFII	absent	absent	-	absent
SAMN11415807	soil						GCF_005848825.1	ASM584882v1	Complete_Genome	NA	JP9	NA	4681542	1	4681542	299767	Enterobacter_ludwigii_(enterobacteria)	Enterobacter_ludwigii	ftp://ftp.ncbi.nlm.nih.gov/genomes/all/GCF/005/848/825/GCF_005848825.1_ASM584882v1	ftp://ftp.ncbi.nlm.nih.gov/genomes/all/GCA/005/848/825/GCA_005848825.1_ASM584882v1	Shandong_Agricultural_University	2019/05/27_00:00	2019/05/27_00:00	2019/05/27_00:00	2019/05/29_00:00	SAMN11415807	assembly	Enterobacter_spp	E_ludwigii	#N/A	-		NA	absent	absent	-	present
SAMN11415570	rhizosphere_soil	Tobacco					GCF_005518115.1	ASM551811v1	Complete_Genome	NA	JP6	NA	4681598	1	4681598	299767	Enterobacter_ludwigii_(enterobacteria)	Enterobacter_ludwigii	ftp://ftp.ncbi.nlm.nih.gov/genomes/all/GCF/005/518/115/GCF_005518115.1_ASM551811v1	ftp://ftp.ncbi.nlm.nih.gov/genomes/all/GCA/005/518/115/GCA_005518115.1_ASM551811v1	Shandong_Agricultural_University	2019/05/20_00:00	2019/05/20_00:00	2019/05/20_00:00	2019/05/23_00:00	SAMN11415570	assembly	Enterobacter_spp	E_ludwigii	#N/A	-		NA	absent	absent	-	present
SAMEA2273468	blood	Homo_sapiens					GCF_900076775.1	12045_5#48	Scaffold	NA	e2760	FKBU01	4682058	26	403761	550	Enterobacter_cloacae_(enterobacteria)	Enterobacter_cloacae	ftp://ftp.ncbi.nlm.nih.gov/genomes/all/GCF/900/076/775/GCF_900076775.1_12045_5_48	ftp://ftp.ncbi.nlm.nih.gov/genomes/all/GCA/900/076/775/GCA_900076775.1_12045_5_48	SC	2016/04/13_00:00	2016/05/09_00:00	2016/05/09_00:00	2016/05/14_00:00	SAMEA2273468	assembly	Enterobacter_spp	E_xiangfangensis	1	151		NA	absent	absent	-	present
SAMN04521851	missing	Homo_sapiens	missing	missing	University_of_California,_Irvine	missing	GCF_002151935.1	ASM215193v1	Scaffold	NA	UCI101	NGRR01	4683023	49	196892	158836	Enterobacter_hormaechei_(enterobacteria)	Enterobacter_hormaechei	ftp://ftp.ncbi.nlm.nih.gov/genomes/all/GCF/002/151/935/GCF_002151935.1_ASM215193v1	ftp://ftp.ncbi.nlm.nih.gov/genomes/all/GCA/002/151/935/GCA_002151935.1_ASM215193v1	Broad_Institute	2017/05/19_00:00	2017/05/19_00:00	2017/05/19_00:00	2018/11/14_00:00	SAMN04521851	assembly	Enterobacter_spp	E_xiangfangensis	1	141		NA	absent	absent	-	present
SAMN03280176	missing	Homo_sapiens	missing	missing	missing	missing	GCF_001030145.1	Ente_cloa_UCI86_V1	Scaffold	NA	UCI86	LETA01	4683115	12	615912	158836	Enterobacter_hormaechei_(enterobacteria)	Enterobacter_hormaechei	ftp://ftp.ncbi.nlm.nih.gov/genomes/all/GCF/001/030/145/GCF_001030145.1_Ente_cloa_UCI86_V1	ftp://ftp.ncbi.nlm.nih.gov/genomes/all/GCA/001/030/145/GCA_001030145.1_Ente_cloa_UCI86_V1	Broad_Institute	2015/06/22_00:00	2015/06/22_00:00	2015/06/22_00:00	2018/11/14_00:00	SAMN03280176	assembly	Enterobacter_spp	E_xiangfangensis	3	805		IncR	absent	absent	-	absent
SAMN05428986	missing	not_applicable					GCF_900142835.1	IMG-taxon_2690315661_annotated_assembly	Scaffold	NA	PDC34	FRCI01	4683223	19	697266	1881029	Enterobacter_sp._PDC34_(enterobacteria)	Enterobacter_sp._PDC34	ftp://ftp.ncbi.nlm.nih.gov/genomes/all/GCF/900/142/835/GCF_900142835.1_IMG-taxon_2690315661_annotated_assembly	ftp://ftp.ncbi.nlm.nih.gov/genomes/all/GCA/900/142/835/GCA_900142835.1_IMG-taxon_2690315661_annotated_assembly	DOE_-_JOINT_GENOME_INSTITUTE	2016/12/03_00:00	2016/12/09_00:00	2016/12/09_00:00	2016/12/18_00:00	SAMN05428986	assembly	Enterobacter_spp	E_ludwigii	#N/A	-		NA	absent	absent	-	present
SAMN04572705	Unknown	Homo_sapiens	Bloodstream_infection		Vance_Fowler		GCF_001631885.1	ASM163188v1	Contig	NA	GN06315	LVVE01	4683650	124	58214	61645	Enterobacter_asburiae_(enterobacteria)	Enterobacter_asburiae	ftp://ftp.ncbi.nlm.nih.gov/genomes/all/GCF/001/631/885/GCF_001631885.1_ASM163188v1	ftp://ftp.ncbi.nlm.nih.gov/genomes/all/GCA/001/631/885/GCA_001631885.1_ASM163188v1	JCVI	2016/04/25_00:00	2016/04/25_00:00	2016/04/25_00:00	2016/04/26_00:00	SAMN04572705	assembly	Enterobacter_spp	E_asburiae	#N/A	-		NA	absent	absent	-	present
SAMN02138562	urine	missing					GCF_000493055.1	Ente_cloa_complex_MGH_22_V1	Scaffold	NA	MGH_22	AYJI01	4684377	11	1312965	1329826	Enterobacter_sp._MGH_22_(enterobacteria)	Enterobacter_sp._MGH_22	ftp://ftp.ncbi.nlm.nih.gov/genomes/all/GCF/000/493/055/GCF_000493055.1_Ente_cloa_complex_MGH_22_V1	ftp://ftp.ncbi.nlm.nih.gov/genomes/all/GCA/000/493/055/GCA_000493055.1_Ente_cloa_complex_MGH_22_V1	Broad_Institute	2013/10/30_00:00	2013/10/30_00:00	2013/10/30_00:00	2014/10/09_00:00	SAMN02138562	assembly	Enterobacter_spp	E_kobei	#N/A	726		NA	absent	absent	-	present
SAMN03333182	urine	Homo_sapiens	Not_available		missing		GCF_000958885.1	ASM95888v1	Scaffold	NA	MNCRE4	JZDF01	4684725	74	161689	881260	Enterobacter_bugandensis_(enterobacteria)	Enterobacter_bugandensis	ftp://ftp.ncbi.nlm.nih.gov/genomes/all/GCF/000/958/885/GCF_000958885.1_ASM95888v1	ftp://ftp.ncbi.nlm.nih.gov/genomes/all/GCA/000/958/885/GCA_000958885.1_ASM95888v1	University_of_Minnesota	2015/03/20_00:00	2015/03/20_00:00	2015/03/20_00:00	2019/01/07_00:00	SAMN03333182	assembly	Enterobacter_spp	E_bugandensis	#N/A	734		NA	absent	absent	-	present
SAMEA5852003	human_gut						GCA_902387735.1	UHGG_MGYG-HGUT-02498	Scaffold	MGYG-HGUT-02498		CABMND01	4686183	47	212690	550	Enterobacter_cloacae_(enterobacteria)	Enterobacter_cloacae	NA	ftp://ftp.ncbi.nlm.nih.gov/genomes/all/GCA/902/387/735/GCA_902387735.1_UHGG_MGYG-HGUT-02498	EMG	2019/08/16_00:00	2019/08/17_00:00	2019/08/17_00:00	2019/08/17_00:00	SAMEA5852003	assembly	Enterobacter_spp	E_sichuanensis	#N/A	-		NA	absent	absent	blaIMI-1	present
SAMN07448204	human_gut	Homo_sapiens	None_(screening_isolate)		Koh_Tse_Hsien,_Singapore_General_Hospital		GCF_002278245.1	ASM227824v1	Scaffold	NA	DS15987	NPNO01	4686183	47	212690	550	Enterobacter_cloacae_(enterobacteria)	Enterobacter_cloacae	ftp://ftp.ncbi.nlm.nih.gov/genomes/all/GCF/002/278/245/GCF_002278245.1_ASM227824v1	ftp://ftp.ncbi.nlm.nih.gov/genomes/all/GCA/002/278/245/GCA_002278245.1_ASM227824v1	National_University_of_Singapore_and_Genome_Institute_of_Singapore	2017/08/30_00:00	2017/08/30_00:00	2017/08/30_00:00	2017/09/01_00:00	SAMN07448204	assembly	Enterobacter_spp	E_sichuanensis	#N/A	-		NA	absent	absent	blaIMI-1	present
SAMN10638715	rectal_swab	Homo_sapiens	not_collected		not_collected		GCF_004006055.1	ASM400605v1	Complete_Genome	NA	N18-03635	NA	4687155	2	4561369	2500132	Enterobacter_sp._N18-03635_(enterobacteria)	Enterobacter_sp._N18-03635	ftp://ftp.ncbi.nlm.nih.gov/genomes/all/GCF/004/006/055/GCF_004006055.1_ASM400605v1	ftp://ftp.ncbi.nlm.nih.gov/genomes/all/GCA/004/006/055/GCA_004006055.1_ASM400605v1	Public_Health_Agency_of_Canada	2019/01/09_00:00	2019/01/09_00:00	2019/01/09_00:00	2019/01/12_00:00	SAMN10638715	assembly	Enterobacter_spp	E_vonholyi	#N/A	1108		IncFIB_IncFII	absent	absent	blaFRI-6	present
SAMN08932718		Homo_sapiens					GCF_003986715.1	ASM398671v1	Contig	NA	WCHEA045222	RXPY01	4688489	68	265592	61645	Enterobacter_asburiae_(enterobacteria)	Enterobacter_asburiae	ftp://ftp.ncbi.nlm.nih.gov/genomes/all/GCF/003/986/715/GCF_003986715.1_ASM398671v1	ftp://ftp.ncbi.nlm.nih.gov/genomes/all/GCA/003/986/715/GCA_003986715.1_ASM398671v1	West_China_Hospital,_Sichuan_University	2018/12/23_00:00	2018/12/31_00:00	2018/12/31_00:00	2019/01/02_00:00	SAMN08932718	assembly	Enterobacter_spp	E_asburiae	#N/A	25		NA	absent	absent	-	present
SAMN02356610	urine	Homo_sapiens					GCF_000534215.1	Ente_cloa_UCI_30_V1	Scaffold	NA	UCI_30	JCKT01	4688814	16	752446	158836	Enterobacter_hormaechei_(enterobacteria)	Enterobacter_hormaechei	ftp://ftp.ncbi.nlm.nih.gov/genomes/all/GCF/000/534/215/GCF_000534215.1_Ente_cloa_UCI_30_V1	ftp://ftp.ncbi.nlm.nih.gov/genomes/all/GCA/000/534/215/GCA_000534215.1_Ente_cloa_UCI_30_V1	Broad_Institute	2014/02/03_00:00	2014/02/03_00:00	2014/02/03_00:00	2018/11/14_00:00	SAMN02356610	assembly	Enterobacter_spp	E_xiangfangensis	1	742		NA	absent	absent	-	present
SAMN06457285	metal/plastic						GCA_002453695.1	ASM245369v1	Scaffold	UBA6747		DKHJ01	4689394	18	343670	158836	Enterobacter_hormaechei_(enterobacteria)	Enterobacter_hormaechei	NA	ftp://ftp.ncbi.nlm.nih.gov/genomes/all/GCA/002/453/695/GCA_002453695.1_ASM245369v1	University_of_Queensland	2017/10/05_00:00	2017/10/05_00:00	2017/10/05_00:00	2017/10/05_00:00	SAMN06457285	assembly	Enterobacter_spp	E_xiangfangensis	1	-		NA	absent	absent	-	present
SAMEA2273302	blood	Homo_sapiens					GCF_900075295.1	11983_7#78	Scaffold	NA	e1132	FJWY01	4690686	75	105328	550	Enterobacter_cloacae_(enterobacteria)	Enterobacter_cloacae	ftp://ftp.ncbi.nlm.nih.gov/genomes/all/GCF/900/075/295/GCF_900075295.1_11983_7_78	ftp://ftp.ncbi.nlm.nih.gov/genomes/all/GCA/900/075/295/GCA_900075295.1_11983_7_78	SC	2016/04/05_00:00	2016/04/06_00:00	2016/04/06_00:00	2016/04/12_00:00	SAMEA2273302	assembly	Enterobacter_spp	E_xiangfangensis	2	97		NA	absent	absent	-	absent
SAMN06703827	unknown	Homo_sapiens	unknown		Christiana_Jesumirhewe		GCF_002204965.1	ASM220496v1	Contig	NA	Q9	NIZF01	4691860	148	71755	1812934	Enterobacter_hormaechei_subsp._hoffmannii_(enterobacteria)	Enterobacter_hormaechei	ftp://ftp.ncbi.nlm.nih.gov/genomes/all/GCF/002/204/965/GCF_002204965.1_ASM220496v1	ftp://ftp.ncbi.nlm.nih.gov/genomes/all/GCA/002/204/965/GCA_002204965.1_ASM220496v1	Austrian_Agency_for_Health_and_Food_Safety,_Vienna,_Austria	2017/06/22_00:00	2017/06/22_00:00	2017/06/22_00:00	2017/06/24_00:00	SAMN06703827	assembly	Enterobacter_spp	E_xiangfangensis	2	78		IncL/M	absent	absent	-	absent
SAMN08623825	bloodstream	Homo_sapiens	bacterial_infectious_disease		Stanford_Healthcare_Clinical_Microbiology_Laboratory		GCF_003401175.1	ASM340117v1	Contig	NA	CRE71	PXKA01	4692616	244	135120	208224	Enterobacter_kobei_(enterobacteria)	Enterobacter_kobei	ftp://ftp.ncbi.nlm.nih.gov/genomes/all/GCF/003/401/175/GCF_003401175.1_ASM340117v1	ftp://ftp.ncbi.nlm.nih.gov/genomes/all/GCA/003/401/175/GCA_003401175.1_ASM340117v1	Stanford_Healthcare	2018/08/16_00:00	2018/08/16_00:00	2018/08/16_00:00	2018/08/21_00:00	SAMN08623825	assembly	Enterobacter_spp	E_kobei	#N/A	125		IncFIB_IncFII	absent	present	-	present
SAMEA2273422	blood	Homo_sapiens					GCF_900076265.1	12045_5#2	Scaffold	NA	e1879	FKBA01	4693225	54	142020	550	Enterobacter_cloacae_(enterobacteria)	Enterobacter_cloacae	ftp://ftp.ncbi.nlm.nih.gov/genomes/all/GCF/900/076/265/GCF_900076265.1_12045_5_2	ftp://ftp.ncbi.nlm.nih.gov/genomes/all/GCA/900/076/265/GCA_900076265.1_12045_5_2	SC	2016/04/13_00:00	2016/05/09_00:00	2016/05/09_00:00	2016/05/14_00:00	SAMEA2273422	assembly	Enterobacter_spp	E_xiangfangensis	3	114		NA	absent	absent	-	absent
SAMN09845200		Homo_sapiens					GCF_003965265.1	ASM396526v1	Contig	NA	WCHEH090022	RXRF01	4693753	67	231021	158836	Enterobacter_hormaechei_(enterobacteria)	Enterobacter_hormaechei	ftp://ftp.ncbi.nlm.nih.gov/genomes/all/GCF/003/965/265/GCF_003965265.1_ASM396526v1	ftp://ftp.ncbi.nlm.nih.gov/genomes/all/GCA/003/965/265/GCA_003965265.1_ASM396526v1	West_China_Hospital,_Sichuan_University	2018/12/23_00:00	2018/12/23_00:00	2018/12/23_00:00	2018/12/28_00:00	SAMN09845200	assembly	Enterobacter_spp	E_xiangfangensis	3	171		FIA_IncFIA_IncR_IncX3	absent	absent	blaNDM-5	absent
SAMN09083425	missing	not_applicable					GCF_004362415.1	ASM436241v1	Scaffold	NA	AG326	SNXG01	4694179	31	587817	2183902	Enterobacter_sp._AG326_(enterobacteria)	Enterobacter_sp._AG326	ftp://ftp.ncbi.nlm.nih.gov/genomes/all/GCF/004/362/415/GCF_004362415.1_ASM436241v1	ftp://ftp.ncbi.nlm.nih.gov/genomes/all/GCA/004/362/415/GCA_004362415.1_ASM436241v1	DOE_Joint_Genome_Institute	2019/03/22_00:00	2019/03/22_00:00	2019/03/22_00:00	2019/03/25_00:00	SAMN09083425	assembly	Enterobacter_spp	E_asburiae	#N/A	-		NA	absent	absent	-	present
SAMN09845201		Homo_sapiens					GCF_003965255.1	ASM396525v1	Contig	NA	WCHEH090023	RXRG01	4694215	71	231472	158836	Enterobacter_hormaechei_(enterobacteria)	Enterobacter_hormaechei	ftp://ftp.ncbi.nlm.nih.gov/genomes/all/GCF/003/965/255/GCF_003965255.1_ASM396525v1	ftp://ftp.ncbi.nlm.nih.gov/genomes/all/GCA/003/965/255/GCA_003965255.1_ASM396525v1	West_China_Hospital,_Sichuan_University	2018/12/23_00:00	2018/12/23_00:00	2018/12/23_00:00	2018/12/28_00:00	SAMN09845201	assembly	Enterobacter_spp	E_xiangfangensis	3	171		FIA_IncFIA_IncR_IncX3	absent	absent	blaNDM-5	absent
SAMEA103972944							GCF_900180435.1	Enterobacter_muelleri_JM-458T.fasta	Contig	Enterobacter_muelleri_JM-458T		FXLQ01	4695678	66	788623	61645	Enterobacter_asburiae_(enterobacteria)	Enterobacter_asburiae	ftp://ftp.ncbi.nlm.nih.gov/genomes/all/GCF/900/180/435/GCF_900180435.1_Enterobacter_muelleri_JM-458T.fasta	ftp://ftp.ncbi.nlm.nih.gov/genomes/all/GCA/900/180/435/GCA_900180435.1_Enterobacter_muelleri_JM-458T.fasta	JUSTUS_LIEBIG_UNIVERSITY	2017/04/27_00:00	2017/05/03_00:00	2017/05/03_00:00	2017/05/06_00:00	SAMEA103972944	assembly	Enterobacter_spp	E_asburiae	#N/A	-		IncFIB_IncFII	absent	absent	-	present
SAMN07448200	rectal	Homo_sapiens	None_(screening_isolate)		Koh_Tse_Hsien,_Singapore_General_Hospital		GCF_002278335.1	ASM227833v1	Scaffold	NA	DS8397	NPNS01	4695949	34	244862	1812935	Enterobacter_roggenkampii_(enterobacteria)	Enterobacter_roggenkampii	ftp://ftp.ncbi.nlm.nih.gov/genomes/all/GCF/002/278/335/GCF_002278335.1_ASM227833v1	ftp://ftp.ncbi.nlm.nih.gov/genomes/all/GCA/002/278/335/GCA_002278335.1_ASM227833v1	National_University_of_Singapore_and_Genome_Institute_of_Singapore	2017/08/30_00:00	2017/08/30_00:00	2017/08/30_00:00	2019/01/07_00:00	SAMN07448200	assembly	Enterobacter_spp	E_roggenkampii	#N/A	-		NA	absent	absent	blaIMI-1	present
SAMN08932729	Missing						GCF_003965025.1	ASM396502v1	Contig	NA	WCHEH045778	RXQJ01	4696296	57	182244	158836	Enterobacter_hormaechei_(enterobacteria)	Enterobacter_hormaechei	ftp://ftp.ncbi.nlm.nih.gov/genomes/all/GCF/003/965/025/GCF_003965025.1_ASM396502v1	ftp://ftp.ncbi.nlm.nih.gov/genomes/all/GCA/003/965/025/GCA_003965025.1_ASM396502v1	West_China_Hospital,_Sichuan_University	2018/12/23_00:00	2018/12/23_00:00	2018/12/23_00:00	2018/12/28_00:00	SAMN08932729	assembly	Enterobacter_spp	E_hormaechei	#N/A	528		NA	absent	absent	-	absent
SAMN03159336							GCF_900113755.1	IMG-taxon_2602042047_annotated_assembly	Scaffold	NA	NFIX59	FOQN01	4697674	20	452444	1566258	Enterobacter_sp._NFIX59_(enterobacteria)	Enterobacter_sp._NFIX59	ftp://ftp.ncbi.nlm.nih.gov/genomes/all/GCF/900/113/755/GCF_900113755.1_IMG-taxon_2602042047_annotated_assembly	ftp://ftp.ncbi.nlm.nih.gov/genomes/all/GCA/900/113/755/GCA_900113755.1_IMG-taxon_2602042047_annotated_assembly	DOE_-_JOINT_GENOME_INSTITUTE	2016/11/02_00:00	2016/11/07_00:00	2016/11/07_00:00	2017/07/29_00:00	SAMN03159336	assembly	Enterobacter_spp	Unidentified-5	#N/A	-		NA	absent	absent	-	present
SAMEA5852008	human_gut						GCA_902387865.1	UHGG_MGYG-HGUT-02503	Contig	MGYG-HGUT-02503		CABMNI01	4697885	26	332883	550	Enterobacter_cloacae_(enterobacteria)	Enterobacter_cloacae	NA	ftp://ftp.ncbi.nlm.nih.gov/genomes/all/GCA/902/387/865/GCA_902387865.1_UHGG_MGYG-HGUT-02503	EMG	2019/08/16_00:00	2019/08/17_00:00	2019/08/17_00:00	2019/08/17_00:00	SAMEA5852008	assembly	Enterobacter_spp	E_ludwigii	#N/A	-		NA	absent	absent	-	present
SAMN08374129	human_gut	Homo_sapiens	Diarrhea,_Antibiotic-associated		Division_of_Microbiology_&amp;_Infectious_Diseases,_PathWest_Laboratory_Medicine		GCF_003312995.1	ASM331299v1	Contig	NA	DLL7524	PQCT01	4697885	26	332883	299767	Enterobacter_ludwigii_(enterobacteria)	Enterobacter_ludwigii	ftp://ftp.ncbi.nlm.nih.gov/genomes/all/GCF/003/312/995/GCF_003312995.1_ASM331299v1	ftp://ftp.ncbi.nlm.nih.gov/genomes/all/GCA/003/312/995/GCA_003312995.1_ASM331299v1	Monash_University	2018/07/11_00:00	2018/07/11_00:00	2018/07/11_00:00	2019/01/08_00:00	SAMN08374129	assembly	Enterobacter_spp	E_ludwigii	#N/A	-		NA	absent	absent	-	present
SAMN06244856	missing	not_applicable					GCF_003688535.1	ASM368853v1	Contig	NA	WPL_7_1	REFK01	4698037	15	798802	1907563	Enterobacter_sp._WP_7_1_(enterobacteria)	Enterobacter_sp._WP_7_1	ftp://ftp.ncbi.nlm.nih.gov/genomes/all/GCF/003/688/535/GCF_003688535.1_ASM368853v1	ftp://ftp.ncbi.nlm.nih.gov/genomes/all/GCA/003/688/535/GCA_003688535.1_ASM368853v1	DOE_Joint_Genome_Institute	2018/10/25_00:00	2018/10/25_00:00	2018/10/25_00:00	2018/10/27_00:00	SAMN06244856	assembly	Enterobacter_spp	E_asburiae	#N/A	-		IncFIB_IncFII_IncR	absent	absent	-	present
SAMN06244857	missing	not_applicable					GCF_003688655.1	ASM368865v1	Contig	NA	WPL_7_2	REFN01	4698037	15	798802	1907564	Enterobacter_sp._WP_7_2_(enterobacteria)	Enterobacter_sp._WP_7_2	ftp://ftp.ncbi.nlm.nih.gov/genomes/all/GCF/003/688/655/GCF_003688655.1_ASM368865v1	ftp://ftp.ncbi.nlm.nih.gov/genomes/all/GCA/003/688/655/GCA_003688655.1_ASM368865v1	DOE_Joint_Genome_Institute	2018/10/25_00:00	2018/10/25_00:00	2018/10/25_00:00	2018/10/27_00:00	SAMN06244857	assembly	Enterobacter_spp	E_asburiae	#N/A	-		IncFIB_IncFII_IncR	absent	absent	-	present
SAMN03495965		Homo_sapiens			Vance_Fowler		GCF_001011775.1	ASM101177v1	Contig	NA	GN02032	LDCC01	4698256	92	154706	301102	Enterobacter_hormaechei_subsp._oharae_(enterobacteria)	Enterobacter_hormaechei	ftp://ftp.ncbi.nlm.nih.gov/genomes/all/GCF/001/011/775/GCF_001011775.1_ASM101177v1	ftp://ftp.ncbi.nlm.nih.gov/genomes/all/GCA/001/011/775/GCA_001011775.1_ASM101177v1	JCVI	2015/05/21_00:00	2015/05/21_00:00	2015/05/21_00:00	2018/10/10_00:00	SAMN03495965	assembly	Enterobacter_spp	E_xiangfangensis	4	686		IncFIB_IncFII	absent	absent	-	absent
SAMN06703828	urine	Homo_sapiens	Urogenital_disease		Christiana_Jesumirhewe		GCF_002204955.1	ASM220495v1	Contig	NA	2840_1	NIZM01	4698288	110	109611	1812934	Enterobacter_hormaechei_subsp._hoffmannii_(enterobacteria)	Enterobacter_hormaechei	ftp://ftp.ncbi.nlm.nih.gov/genomes/all/GCF/002/204/955/GCF_002204955.1_ASM220495v1	ftp://ftp.ncbi.nlm.nih.gov/genomes/all/GCA/002/204/955/GCA_002204955.1_ASM220495v1	Austrian_Agency_for_Health_and_Food_Safety,_Vienna,_Austria	2017/06/22_00:00	2017/06/22_00:00	2017/06/22_00:00	2017/06/24_00:00	SAMN06703828	assembly	Enterobacter_spp	E_xiangfangensis	2	78		IncL/M	absent	absent	-	absent
SAMN03198137	missing	Homo_sapiens	missing		UW_clinical_laboratory		GCF_001075365.1	ASM107536v1	Contig	NA	921_ECLO	JUNO01	4698700	140	105602	301102	Enterobacter_hormaechei_subsp._oharae_(enterobacteria)	Enterobacter_hormaechei	ftp://ftp.ncbi.nlm.nih.gov/genomes/all/GCF/001/075/365/GCF_001075365.1_ASM107536v1	ftp://ftp.ncbi.nlm.nih.gov/genomes/all/GCA/001/075/365/GCA_001075365.1_ASM107536v1	University_of_Washington	2015/07/10_00:00	2015/07/10_00:00	2015/07/10_00:00	2016/07/20_00:00	SAMN03198137	assembly	Enterobacter_spp	E_xiangfangensis	4	108		IncFIB_IncFII	absent	absent	-	absent
SAMN04490973	roots	Phoenix_dactylifera			Dr._Mahmoud_Yaish		GCF_001675835.1	CLC_Genomics_Workbench	Scaffold	NA	PDA134	LSQV01	4699637	26	475821	1812935	Enterobacter_roggenkampii_(enterobacteria)	Enterobacter_roggenkampii	ftp://ftp.ncbi.nlm.nih.gov/genomes/all/GCF/001/675/835/GCF_001675835.1_CLC_Genomics_Workbench	ftp://ftp.ncbi.nlm.nih.gov/genomes/all/GCA/001/675/835/GCA_001675835.1_CLC_Genomics_Workbench	Sultan_Qaboos_University	2016/06/23_00:00	2016/06/23_00:00	2016/06/23_00:00	2019/01/07_00:00	SAMN04490973	assembly	Enterobacter_spp	E_roggenkampii	#N/A	-		NA	absent	absent	-	present
SAMEA2273152	blood	Homo_sapiens					GCF_900076935.1	12045_4#29	Scaffold	NA	e332	FKDP01	4700629	35	208792	550	Enterobacter_cloacae_(enterobacteria)	Enterobacter_cloacae	ftp://ftp.ncbi.nlm.nih.gov/genomes/all/GCF/900/076/935/GCF_900076935.1_12045_4_29	ftp://ftp.ncbi.nlm.nih.gov/genomes/all/GCA/900/076/935/GCA_900076935.1_12045_4_29	SC	2016/04/13_00:00	2016/05/09_00:00	2016/05/09_00:00	2016/05/14_00:00	SAMEA2273152	assembly	Enterobacter_spp	E_xiangfangensis	1	62		NA	absent	absent	-	present
SAMN03280188	missing	Homo_sapiens	missing	missing	missing	missing	GCF_001037805.1	Ente_cloa_complex_BIDMC93_V1	Scaffold	NA	BIDMC93	LETL01	4701014	8	965816	1686396	Enterobacter_sp._BIDMC93_(enterobacteria)	Enterobacter_sp._BIDMC93	ftp://ftp.ncbi.nlm.nih.gov/genomes/all/GCF/001/037/805/GCF_001037805.1_Ente_cloa_complex_BIDMC93_V1	ftp://ftp.ncbi.nlm.nih.gov/genomes/all/GCA/001/037/805/GCA_001037805.1_Ente_cloa_complex_BIDMC93_V1	Broad_Institute	2015/06/22_00:00	2015/06/22_00:00	2015/06/22_00:00	2016/01/21_00:00	SAMN03280188	assembly	Enterobacter_spp	E_xiangfangensis	1	677		NA	absent	absent	-	present
SAMN03197343	missing	Homo_sapiens	missing		UW_clinical_laboratory		GCF_001054435.1	ASM105443v1	Scaffold	NA	153_ECLO	JVSD01	4701120	52	149136	881260	Enterobacter_bugandensis_(enterobacteria)	Enterobacter_bugandensis	ftp://ftp.ncbi.nlm.nih.gov/genomes/all/GCF/001/054/435/GCF_001054435.1_ASM105443v1	ftp://ftp.ncbi.nlm.nih.gov/genomes/all/GCA/001/054/435/GCA_001054435.1_ASM105443v1	University_of_Washington	2015/07/10_00:00	2015/07/10_00:00	2015/07/10_00:00	2019/01/07_00:00	SAMN03197343	assembly	Enterobacter_spp	E_bugandensis	#N/A	659		NA	absent	absent	-	present
SAMEA2273277	blood	Homo_sapiens					GCF_900078165.1	11983_7#53	Scaffold	NA	e977	FKIB01	4701252	30	347798	550	Enterobacter_cloacae_(enterobacteria)	Enterobacter_cloacae	ftp://ftp.ncbi.nlm.nih.gov/genomes/all/GCF/900/078/165/GCF_900078165.1_11983_7_53	ftp://ftp.ncbi.nlm.nih.gov/genomes/all/GCA/900/078/165/GCA_900078165.1_11983_7_53	SC	2016/04/13_00:00	2016/05/09_00:00	2016/05/09_00:00	2016/05/14_00:00	SAMEA2273277	assembly	Enterobacter_spp	E_bugandensis	#N/A	784		NA	absent	absent	-	present
SAMN06704511	urine	Homo_sapiens	Urogenital_disease		Christiana_Jesumirhewe		GCF_002204935.1	ASM220493v1	Contig	NA	2845	NIZG01	4701394	128	76458	1812934	Enterobacter_hormaechei_subsp._hoffmannii_(enterobacteria)	Enterobacter_hormaechei	ftp://ftp.ncbi.nlm.nih.gov/genomes/all/GCF/002/204/935/GCF_002204935.1_ASM220493v1	ftp://ftp.ncbi.nlm.nih.gov/genomes/all/GCA/002/204/935/GCA_002204935.1_ASM220493v1	Austrian_Agency_for_Health_and_Food_Safety,_Vienna,_Austria	2017/06/22_00:00	2017/06/22_00:00	2017/06/22_00:00	2017/06/24_00:00	SAMN06704511	assembly	Enterobacter_spp	E_xiangfangensis	2	78		IncL/M	absent	absent	-	absent
SAMEA2273463	blood	Homo_sapiens					GCF_900076695.1	12045_5#42	Scaffold	NA	e2575	FKCW01	4702520	70	120208	550	Enterobacter_cloacae_(enterobacteria)	Enterobacter_cloacae	ftp://ftp.ncbi.nlm.nih.gov/genomes/all/GCF/900/076/695/GCF_900076695.1_12045_5_42	ftp://ftp.ncbi.nlm.nih.gov/genomes/all/GCA/900/076/695/GCA_900076695.1_12045_5_42	SC	2016/04/13_00:00	2016/05/09_00:00	2016/05/09_00:00	2016/05/14_00:00	SAMEA2273463	assembly	Enterobacter_spp	E_xiangfangensis	2	97		NA	absent	absent	-	absent
SAMN10525016		Homo_sapiens					GCF_003964825.1	ASM396482v1	Contig	NA	WCHEB090210	RXSV01	4704549	46	263418	881260	Enterobacter_bugandensis_(enterobacteria)	Enterobacter_bugandensis	ftp://ftp.ncbi.nlm.nih.gov/genomes/all/GCF/003/964/825/GCF_003964825.1_ASM396482v1	ftp://ftp.ncbi.nlm.nih.gov/genomes/all/GCA/003/964/825/GCA_003964825.1_ASM396482v1	West_China_Hospital,_Sichuan_University	2018/12/23_00:00	2018/12/23_00:00	2018/12/23_00:00	2018/12/28_00:00	SAMN10525016	assembly	Enterobacter_spp	E_bugandensis	#N/A	499		NA	absent	absent	-	present
SAMEA2273464	blood	Homo_sapiens					GCF_900076725.1	12045_5#44	Scaffold	NA	e2698	FKBY01	4704977	60	165521	550	Enterobacter_cloacae_(enterobacteria)	Enterobacter_cloacae	ftp://ftp.ncbi.nlm.nih.gov/genomes/all/GCF/900/076/725/GCF_900076725.1_12045_5_44	ftp://ftp.ncbi.nlm.nih.gov/genomes/all/GCA/900/076/725/GCA_900076725.1_12045_5_44	SC	2016/04/13_00:00	2016/05/09_00:00	2016/05/09_00:00	2016/05/14_00:00	SAMEA2273464	assembly	Enterobacter_spp	E_xiangfangensis	3	144		IncFIB_IncFII	absent	absent	-	absent
SAMN03495969		Homo_sapiens			Vance_Fowler		GCF_001011895.1	ASM101189v1	Contig	NA	GN02108	LDCG01	4704988	81	123743	1296536	Enterobacter_hormaechei_subsp._xiangfangensis_(enterobacteria)	Enterobacter_hormaechei	ftp://ftp.ncbi.nlm.nih.gov/genomes/all/GCF/001/011/895/GCF_001011895.1_ASM101189v1	ftp://ftp.ncbi.nlm.nih.gov/genomes/all/GCA/001/011/895/GCA_001011895.1_ASM101189v1	JCVI	2015/05/21_00:00	2015/05/21_00:00	2015/05/21_00:00	2018/10/10_00:00	SAMN03495969	assembly	Enterobacter_spp	E_xiangfangensis	3	270		IncFIB_IncFII	absent	absent	-	absent
SAMEA2273205	blood	Homo_sapiens					GCF_900077535.1	12045_4#76	Scaffold	NA	e647	FKFP01	4705139	24	472954	550	Enterobacter_cloacae_(enterobacteria)	Enterobacter_cloacae	ftp://ftp.ncbi.nlm.nih.gov/genomes/all/GCF/900/077/535/GCF_900077535.1_12045_4_76	ftp://ftp.ncbi.nlm.nih.gov/genomes/all/GCA/900/077/535/GCA_900077535.1_12045_4_76	SC	2016/04/13_00:00	2016/05/09_00:00	2016/05/09_00:00	2016/05/14_00:00	SAMEA2273205	assembly	Enterobacter_spp	E_kobei	#N/A	777		NA	absent	absent	-	present
SAMN03401393		Oryza_sativa					GCF_001475835.1	ASM147583v1	Contig	NA	NS24	LDQL01	4705385	187	109643	1296536	Enterobacter_hormaechei_subsp._xiangfangensis_(enterobacteria)	Enterobacter_hormaechei	ftp://ftp.ncbi.nlm.nih.gov/genomes/all/GCF/001/475/835/GCF_001475835.1_ASM147583v1	ftp://ftp.ncbi.nlm.nih.gov/genomes/all/GCA/001/475/835/GCA_001475835.1_ASM147583v1	Bacterial_Genomics_and_Evolution_Laboratory,_CSIR-Institute_of_Microbial_Technology,_Sector_39-A,_Chandigarh,_India	2015/12/22_00:00	2015/12/22_00:00	2015/12/22_00:00	2015/12/25_00:00	SAMN03401393	assembly	Enterobacter_spp	E_xiangfangensis	1	809		NA	absent	absent	-	present
SAMN07448195	rectal	Homo_sapiens	None_(screening_isolate)		Koh_Tse_Hsien,_Singapore_General_Hospital		GCF_002266405.1	ASM226640v1	Scaffold	NA	DS2686	NPNX01	4705944	54	203114	550	Enterobacter_cloacae_(enterobacteria)	Enterobacter_cloacae	ftp://ftp.ncbi.nlm.nih.gov/genomes/all/GCF/002/266/405/GCF_002266405.1_ASM226640v1	ftp://ftp.ncbi.nlm.nih.gov/genomes/all/GCA/002/266/405/GCA_002266405.1_ASM226640v1	National_University_of_Singapore_and_Genome_Institute_of_Singapore	2017/08/22_00:00	2017/08/22_00:00	2017/08/22_00:00	2017/08/24_00:00	SAMN07448195	assembly	Enterobacter_spp	E_sichuanensis	#N/A	-		NA	absent	absent	blaIMI-4	present
SAMN04572692	Unknown	Homo_sapiens	Bloodstream_infection		Vance_Fowler		GCF_001631615.1	ASM163161v1	Contig	NA	GN05811	LVUQ01	4705999	52	151635	299766	Enterobacter_hormaechei_subsp._steigerwaltii_(enterobacteria)	Enterobacter_hormaechei	ftp://ftp.ncbi.nlm.nih.gov/genomes/all/GCF/001/631/615/GCF_001631615.1_ASM163161v1	ftp://ftp.ncbi.nlm.nih.gov/genomes/all/GCA/001/631/615/GCA_001631615.1_ASM163161v1	JCVI	2016/04/25_00:00	2016/04/25_00:00	2016/04/25_00:00	2016/04/26_00:00	SAMN04572692	assembly	Enterobacter_spp	E_xiangfangensis	1	113		IncFIB_IncFII_IncR	absent	absent	-	present
SAMN10525007	bile	Homo_sapiens					GCF_003964335.1	ASM396433v1	Contig	NA	WCHEX090066	RXSN01	4706150	38	402595	1296536	Enterobacter_hormaechei_subsp._xiangfangensis_(enterobacteria)	Enterobacter_hormaechei	ftp://ftp.ncbi.nlm.nih.gov/genomes/all/GCF/003/964/335/GCF_003964335.1_ASM396433v1	ftp://ftp.ncbi.nlm.nih.gov/genomes/all/GCA/003/964/335/GCA_003964335.1_ASM396433v1	West_China_Hospital,_Sichuan_University	2018/12/23_00:00	2018/12/23_00:00	2018/12/23_00:00	2018/12/28_00:00	SAMN10525007	assembly	Enterobacter_spp	E_xiangfangensis	1	1017		FIA_IncFIA	absent	absent	-	present
SAMN10525012	secretion	Homo_sapiens					GCF_003964245.1	ASM396424v1	Contig	NA	WCHEX090073	RXSR01	4706174	38	410562	1296536	Enterobacter_hormaechei_subsp._xiangfangensis_(enterobacteria)	Enterobacter_hormaechei	ftp://ftp.ncbi.nlm.nih.gov/genomes/all/GCF/003/964/245/GCF_003964245.1_ASM396424v1	ftp://ftp.ncbi.nlm.nih.gov/genomes/all/GCA/003/964/245/GCA_003964245.1_ASM396424v1	West_China_Hospital,_Sichuan_University	2018/12/23_00:00	2018/12/23_00:00	2018/12/23_00:00	2018/12/28_00:00	SAMN10525012	assembly	Enterobacter_spp	E_xiangfangensis	1	1017		FIA_IncFIA	absent	absent	-	present
SAMN03401397		Oryza_sativa					GCF_001476095.1	ASM147609v1	Contig	NA	RSA8	LDQU01	4707073	172	134845	1296536	Enterobacter_hormaechei_subsp._xiangfangensis_(enterobacteria)	Enterobacter_hormaechei	ftp://ftp.ncbi.nlm.nih.gov/genomes/all/GCF/001/476/095/GCF_001476095.1_ASM147609v1	ftp://ftp.ncbi.nlm.nih.gov/genomes/all/GCA/001/476/095/GCA_001476095.1_ASM147609v1	Bacterial_Genomics_and_Evolution_Laboratory,_CSIR-Institute_of_Microbial_Technology,_Sector_39-A,_Chandigarh,_India	2015/12/22_00:00	2015/12/22_00:00	2015/12/22_00:00	2015/12/25_00:00	SAMN03401397	assembly	Enterobacter_spp	E_xiangfangensis	1	809		NA	absent	absent	-	present
SAMN10525017		Homo_sapiens					GCF_003964255.1	ASM396425v1	Contig	NA	WCHEB090996	RXSW01	4707696	52	357836	881260	Enterobacter_bugandensis_(enterobacteria)	Enterobacter_bugandensis	ftp://ftp.ncbi.nlm.nih.gov/genomes/all/GCF/003/964/255/GCF_003964255.1_ASM396425v1	ftp://ftp.ncbi.nlm.nih.gov/genomes/all/GCA/003/964/255/GCA_003964255.1_ASM396425v1	West_China_Hospital,_Sichuan_University	2018/12/23_00:00	2018/12/23_00:00	2018/12/23_00:00	2018/12/28_00:00	SAMN10525017	assembly	Enterobacter_spp	E_bugandensis	#N/A	-		NA	absent	absent	-	present
SAMN06454491	wood						GCA_002321475.1	ASM232147v1	Scaffold	UBA1619		DCMP01	4708347	271	40641	550	Enterobacter_cloacae_(enterobacteria)	Enterobacter_cloacae	NA	ftp://ftp.ncbi.nlm.nih.gov/genomes/all/GCA/002/321/475/GCA_002321475.1_ASM232147v1	University_of_Queensland	2017/09/21_00:00	2017/09/21_00:00	2017/09/21_00:00	2017/09/21_00:00	SAMN06454491	assembly	Enterobacter_spp	E_ludwigii	#N/A	-		NA	absent	absent	-	present
SAMEA2273320	blood	Homo_sapiens					GCF_900075065.1	11983_7#96	Scaffold	NA	e1265	FJXA01	4708691	71	160764	550	Enterobacter_cloacae_(enterobacteria)	Enterobacter_cloacae	ftp://ftp.ncbi.nlm.nih.gov/genomes/all/GCF/900/075/065/GCF_900075065.1_11983_7_96	ftp://ftp.ncbi.nlm.nih.gov/genomes/all/GCA/900/075/065/GCA_900075065.1_11983_7_96	SC	2016/04/04_00:00	2016/04/06_00:00	2016/04/06_00:00	2016/04/12_00:00	SAMEA2273320	assembly	Enterobacter_spp	E_xiangfangensis	2	118		IncFIB	absent	absent	-	absent
SAMD00131359		Homo_sapiens					GCF_003427235.1	ASM342723v1	Contig	NA	ntmc-TH	BHEB01	4708934	323	26432	550	Enterobacter_cloacae_(enterobacteria)	Enterobacter_cloacae	ftp://ftp.ncbi.nlm.nih.gov/genomes/all/GCF/003/427/235/GCF_003427235.1_ASM342723v1	ftp://ftp.ncbi.nlm.nih.gov/genomes/all/GCA/003/427/235/GCA_003427235.1_ASM342723v1	Toho_University	2018/07/24_00:00	2018/08/24_00:00	2018/08/24_00:00	2018/10/31_00:00	SAMD00131359	assembly	Enterobacter_spp	E_roggenkampii	#N/A	997		IncFIB_IncN_IncR	absent	present	blaIMP-1	present
SAMN09845222		Homo_sapiens					GCF_003964915.1	ASM396491v1	Contig	NA	WCHEH090057	RXSA01	4709964	74	254962	158836	Enterobacter_hormaechei_(enterobacteria)	Enterobacter_hormaechei	ftp://ftp.ncbi.nlm.nih.gov/genomes/all/GCF/003/964/915/GCF_003964915.1_ASM396491v1	ftp://ftp.ncbi.nlm.nih.gov/genomes/all/GCA/003/964/915/GCA_003964915.1_ASM396491v1	West_China_Hospital,_Sichuan_University	2018/12/23_00:00	2018/12/23_00:00	2018/12/23_00:00	2018/12/28_00:00	SAMN09845222	assembly	Enterobacter_spp	E_xiangfangensis	3	-		IncX3	absent	absent	blaNDM-1	absent
SAMN03197085	missing	Homo_sapiens	missing		UW_clinical_laboratory		GCF_001052195.1	ASM105219v1	Scaffold	NA	1131_ECLO	JWCB01	4710597	116	82906	550	Enterobacter_cloacae_(enterobacteria)	Enterobacter_cloacae	ftp://ftp.ncbi.nlm.nih.gov/genomes/all/GCF/001/052/195/GCF_001052195.1_ASM105219v1	ftp://ftp.ncbi.nlm.nih.gov/genomes/all/GCA/001/052/195/GCA_001052195.1_ASM105219v1	University_of_Washington	2015/07/10_00:00	2015/07/10_00:00	2015/07/10_00:00	2015/07/19_00:00	SAMN03197085	assembly	Enterobacter_spp	Unidentified-5	#N/A	658		NA	absent	absent	-	present
SAMN03732727	bodily_fluid	Homo_sapiens			Vance_Fowler		GCF_001022875.1	ASM102287v1	Contig	NA	GN02773	LEDE01	4711112	40	222902	299766	Enterobacter_hormaechei_subsp._steigerwaltii_(enterobacteria)	Enterobacter_hormaechei	ftp://ftp.ncbi.nlm.nih.gov/genomes/all/GCF/001/022/875/GCF_001022875.1_ASM102287v1	ftp://ftp.ncbi.nlm.nih.gov/genomes/all/GCA/001/022/875/GCA_001022875.1_ASM102287v1	JCVI	2015/06/09_00:00	2015/06/09_00:00	2015/06/09_00:00	2016/06/24_00:00	SAMN03732727	assembly	Enterobacter_spp	E_xiangfangensis	1	662		IncFIB_IncFII_IncR	absent	absent	-	present
SAMN06456260	metal						GCA_002472965.1	ASM247296v1	Scaffold	UBA7243		DKSZ01	4711217	68	133229	158836	Enterobacter_hormaechei_(enterobacteria)	Enterobacter_hormaechei	NA	ftp://ftp.ncbi.nlm.nih.gov/genomes/all/GCA/002/472/965/GCA_002472965.1_ASM247296v1	University_of_Queensland	2017/10/06_00:00	2017/10/06_00:00	2017/10/06_00:00	2017/10/06_00:00	SAMN06456260	assembly	Enterobacter_spp	E_hormaechei	#N/A	-		NA	absent	absent	-	absent
SAMN03197117	missing	Homo_sapiens	missing		UW_clinical_laboratory		GCF_001053955.1	ASM105395v1	Scaffold	NA	1160_ECLO	JWAV01	4711374	148	61206	550	Enterobacter_cloacae_(enterobacteria)	Enterobacter_cloacae	ftp://ftp.ncbi.nlm.nih.gov/genomes/all/GCF/001/053/955/GCF_001053955.1_ASM105395v1	ftp://ftp.ncbi.nlm.nih.gov/genomes/all/GCA/001/053/955/GCA_001053955.1_ASM105395v1	University_of_Washington	2015/07/10_00:00	2015/07/10_00:00	2015/07/10_00:00	2015/07/19_00:00	SAMN03197117	assembly	Enterobacter_spp	Unidentified-5	#N/A	658		NA	absent	absent	-	present
SAMN09845219		Homo_sapiens					GCF_003964905.1	ASM396490v1	Contig	NA	WCHEM090044	RXRX01	4711832	53	291547	539813	Enterobacter_mori_(enterobacteria)	Enterobacter_mori	ftp://ftp.ncbi.nlm.nih.gov/genomes/all/GCF/003/964/905/GCF_003964905.1_ASM396490v1	ftp://ftp.ncbi.nlm.nih.gov/genomes/all/GCA/003/964/905/GCA_003964905.1_ASM396490v1	West_China_Hospital,_Sichuan_University	2018/12/23_00:00	2018/12/23_00:00	2018/12/23_00:00	2018/12/28_00:00	SAMN09845219	assembly	Enterobacter_spp	E_quasimori	#N/A	-		NA	absent	absent	-	present
SAMN03401400		Oryza_sativa					GCF_001475635.1	ASM147563v1	Contig	NA	NS29	LDQN01	4712123	129	160476	1296536	Enterobacter_hormaechei_subsp._xiangfangensis_(enterobacteria)	Enterobacter_hormaechei	ftp://ftp.ncbi.nlm.nih.gov/genomes/all/GCF/001/475/635/GCF_001475635.1_ASM147563v1	ftp://ftp.ncbi.nlm.nih.gov/genomes/all/GCA/001/475/635/GCA_001475635.1_ASM147563v1	Bacterial_Genomics_and_Evolution_Laboratory,_CSIR-Institute_of_Microbial_Technology,_Sector_39-A,_Chandigarh,_India	2015/12/22_00:00	2015/12/22_00:00	2015/12/22_00:00	2015/12/25_00:00	SAMN03401400	assembly	Enterobacter_spp	E_xiangfangensis	1	809		NA	absent	absent	-	present
SAMEA2273266	blood	Homo_sapiens					GCF_900078065.1	11983_7#41	Scaffold	NA	e915	FKHR01	4712793	38	349723	550	Enterobacter_cloacae_(enterobacteria)	Enterobacter_cloacae	ftp://ftp.ncbi.nlm.nih.gov/genomes/all/GCF/900/078/065/GCF_900078065.1_11983_7_41	ftp://ftp.ncbi.nlm.nih.gov/genomes/all/GCA/900/078/065/GCA_900078065.1_11983_7_41	SC	2016/04/13_00:00	2016/05/09_00:00	2016/05/09_00:00	2016/05/14_00:00	SAMEA2273266	assembly	Enterobacter_spp	E_xiangfangensis	1	46		IncR	absent	absent	-	present
SAMN03732707	bodily_fluid	Homo_sapiens			Vance_Fowler		GCF_001022445.2	Assembly_of_colistin-resistant_Enterobacter_cloacae_strain	Contig	NA	GN02454	LEDW02	4715527	22	586033	299767	Enterobacter_ludwigii_(enterobacteria)	Enterobacter_ludwigii	ftp://ftp.ncbi.nlm.nih.gov/genomes/all/GCF/001/022/445/GCF_001022445.2_Assembly_of_colistin-resistant_Enterobacter_cloacae_strain	ftp://ftp.ncbi.nlm.nih.gov/genomes/all/GCA/001/022/445/GCA_001022445.2_Assembly_of_colistin-resistant_Enterobacter_cloacae_strain	JCVI	2016/03/28_00:00	2016/03/28_00:00	2016/03/28_00:00	2018/10/10_00:00	SAMN03732707	assembly	Enterobacter_spp	E_ludwigii	#N/A	698		NA	absent	absent	-	present
SAMN07448201	rectal	Homo_sapiens	None_(screening_isolate)		Koh_Tse_Hsien,_Singapore_General_Hospital		GCF_002278305.1	ASM227830v1	Scaffold	NA	DS11005	NPNR01	4715829	33	353015	550	Enterobacter_cloacae_(enterobacteria)	Enterobacter_cloacae	ftp://ftp.ncbi.nlm.nih.gov/genomes/all/GCF/002/278/305/GCF_002278305.1_ASM227830v1	ftp://ftp.ncbi.nlm.nih.gov/genomes/all/GCA/002/278/305/GCA_002278305.1_ASM227830v1	National_University_of_Singapore_and_Genome_Institute_of_Singapore	2017/08/30_00:00	2017/08/30_00:00	2017/08/30_00:00	2017/09/01_00:00	SAMN07448201	assembly	Enterobacter_spp	E_sichuanensis	#N/A	-		NA	absent	absent	blaIMI-7	present
SAMEA2273156	blood	Homo_sapiens					GCF_900077015.1	12045_4#34	Scaffold	NA	e377	FKDU01	4715909	74	173023	550	Enterobacter_cloacae_(enterobacteria)	Enterobacter_cloacae	ftp://ftp.ncbi.nlm.nih.gov/genomes/all/GCF/900/077/015/GCF_900077015.1_12045_4_34	ftp://ftp.ncbi.nlm.nih.gov/genomes/all/GCA/900/077/015/GCA_900077015.1_12045_4_34	SC	2016/04/13_00:00	2016/05/09_00:00	2016/05/09_00:00	2016/05/14_00:00	SAMEA2273156	assembly	Enterobacter_spp	E_xiangfangensis	2	135		NA	absent	absent	-	absent
SAMN03197118	missing	Homo_sapiens	missing		UW_clinical_laboratory		GCF_001052295.1	ASM105229v1	Scaffold	NA	1161_ECLO	JWAU01	4716067	54	192967	550	Enterobacter_cloacae_(enterobacteria)	Enterobacter_cloacae	ftp://ftp.ncbi.nlm.nih.gov/genomes/all/GCF/001/052/295/GCF_001052295.1_ASM105229v1	ftp://ftp.ncbi.nlm.nih.gov/genomes/all/GCA/001/052/295/GCA_001052295.1_ASM105229v1	University_of_Washington	2015/07/10_00:00	2015/07/10_00:00	2015/07/10_00:00	2015/07/19_00:00	SAMN03197118	assembly	Enterobacter_spp	Unidentified-5	#N/A	658		NA	absent	absent	-	present
SAMN03401399		Oryza_sativa					GCF_001475955.1	ASM147595v1	Contig	NA	NS23	LDQD01	4716160	102	154724	158836	Enterobacter_hormaechei_(enterobacteria)	Enterobacter_hormaechei	ftp://ftp.ncbi.nlm.nih.gov/genomes/all/GCF/001/475/955/GCF_001475955.1_ASM147595v1	ftp://ftp.ncbi.nlm.nih.gov/genomes/all/GCA/001/475/955/GCA_001475955.1_ASM147595v1	Bacterial_Genomics_and_Evolution_Laboratory,_CSIR-Institute_of_Microbial_Technology,_Sector_39-A,_Chandigarh,_India	2015/12/22_00:00	2015/12/22_00:00	2015/12/22_00:00	2019/01/07_00:00	SAMN03401399	assembly	Enterobacter_spp	E_xiangfangensis	1	809		NA	absent	absent	-	present
SAMEA3443780	not_available:_to_be_reported_later	not_available				not_available:_to_be_reported_later	GCF_900447645.1	39130_A01	Contig	NA	NCTC13406	UGIL01	4716418	3	4694076	550	Enterobacter_cloacae_(enterobacteria)	Enterobacter_cloacae	ftp://ftp.ncbi.nlm.nih.gov/genomes/all/GCF/900/447/645/GCF_900447645.1_39130_A01	ftp://ftp.ncbi.nlm.nih.gov/genomes/all/GCA/900/447/645/GCA_900447645.1_39130_A01	SC	2018/08/01_00:00	2018/08/02_00:00	2018/08/02_00:00	2018/08/05_00:00	SAMEA3443780	assembly	Enterobacter_spp	E_xiangfangensis	4	108		NA	absent	absent	-	absent
SAMN08519295	military_dog_fecal_sample	Canis_lupus_familiaris			J_Riehm		GCF_003321545.1	ASM332154v1	Contig	NA	GER_MD12_1511_Ecl_086	PUQH01	4716521	78	151750	158836	Enterobacter_hormaechei_(enterobacteria)	Enterobacter_hormaechei	ftp://ftp.ncbi.nlm.nih.gov/genomes/all/GCF/003/321/545/GCF_003321545.1_ASM332154v1	ftp://ftp.ncbi.nlm.nih.gov/genomes/all/GCA/003/321/545/GCA_003321545.1_ASM332154v1	Northern_Arizona_University	2018/07/15_00:00	2018/07/15_00:00	2018/07/15_00:00	2019/01/08_00:00	SAMN08519295	assembly	Enterobacter_spp	E_xiangfangensis	4	108		NA	absent	absent	-	absent
SAMEA2273371	blood	Homo_sapiens					GCF_900075825.1	11983_6#52	Scaffold	NA	e1521	FJZH01	4717058	43	222180	550	Enterobacter_cloacae_(enterobacteria)	Enterobacter_cloacae	ftp://ftp.ncbi.nlm.nih.gov/genomes/all/GCF/900/075/825/GCF_900075825.1_11983_6_52	ftp://ftp.ncbi.nlm.nih.gov/genomes/all/GCA/900/075/825/GCA_900075825.1_11983_6_52	SC	2016/04/04_00:00	2016/04/06_00:00	2016/04/06_00:00	2016/04/18_00:00	SAMEA2273371	assembly	Enterobacter_spp	E_xiangfangensis	4	68		IncR_pENTAS02	absent	absent	-	absent
SAMEA104711314	blood	Homo_sapiens					GCF_900324475.1	EB-247	Complete_Genome	EB-247		NA	4717613	1	4717613	881260	Enterobacter_bugandensis_(enterobacteria)	Enterobacter_bugandensis	ftp://ftp.ncbi.nlm.nih.gov/genomes/all/GCF/900/324/475/GCF_900324475.1_EB-247	ftp://ftp.ncbi.nlm.nih.gov/genomes/all/GCA/900/324/475/GCA_900324475.1_EB-247	JUSTUS_LIEBIG_UNIVERSITY	2018/04/04_00:00	2018/05/04_00:00	2018/05/04_00:00	2018/05/09_00:00	SAMEA104711314	assembly	Enterobacter_spp	E_bugandensis	#N/A	495	yes	NA	absent	absent	-	present
SAMEA2709018	not_available:_to_be_reported_later	not_available				not_available:_to_be_reported_later	GCF_900447335.1	32407_F01	Contig	NA	NCTC11579	UGIN01	4718420	2	4716309	550	Enterobacter_cloacae_(enterobacteria)	Enterobacter_cloacae	ftp://ftp.ncbi.nlm.nih.gov/genomes/all/GCF/900/447/335/GCF_900447335.1_32407_F01	ftp://ftp.ncbi.nlm.nih.gov/genomes/all/GCA/900/447/335/GCA_900447335.1_32407_F01	SC	2018/08/01_00:00	2018/08/02_00:00	2018/08/02_00:00	2018/08/04_00:00	SAMEA2709018	assembly	Enterobacter_spp	E_xiangfangensis	2	145		NA	present	absent	-	absent
SAMN03012834	excreted_bodily_substance	Homo_sapiens	urinary_tract_infection		Dr_Mohamed		GCF_000802685.1	SPADES_assembly_of_Enterobacter_cloacae_ND15	Contig	NA	ND15	JUHY01	4718668	73	189948	299766	Enterobacter_hormaechei_subsp._steigerwaltii_(enterobacteria)	Enterobacter_hormaechei	ftp://ftp.ncbi.nlm.nih.gov/genomes/all/GCF/000/802/685/GCF_000802685.1_SPADES_assembly_of_Enterobacter_cloacae_ND15	ftp://ftp.ncbi.nlm.nih.gov/genomes/all/GCA/000/802/685/GCA_000802685.1_SPADES_assembly_of_Enterobacter_cloacae_ND15	JCVI	2014/12/16_00:00	2014/12/16_00:00	2014/12/16_00:00	2016/06/15_00:00	SAMN03012834	assembly	Enterobacter_spp	E_xiangfangensis	1	50		IncX4	absent	absent	blaNDM	present
SAMN11415809	Lycium_barbarum_rhizosphere_soil						GCF_005890075.1	ASM589007v1	Complete_Genome	NA	I42	NA	4719369	1	4719369	299767	Enterobacter_ludwigii_(enterobacteria)	Enterobacter_ludwigii	ftp://ftp.ncbi.nlm.nih.gov/genomes/all/GCF/005/890/075/GCF_005890075.1_ASM589007v1	ftp://ftp.ncbi.nlm.nih.gov/genomes/all/GCA/005/890/075/GCA_005890075.1_ASM589007v1	Shandong_Agricultural_University	2019/05/30_00:00	2019/05/30_00:00	2019/05/30_00:00	2019/05/31_00:00	SAMN11415809	assembly	Enterobacter_spp	E_ludwigii	#N/A	-		NA	absent	absent	-	present
SAMN12026966	soil						GCF_006385915.1	ASM638591v1	Complete_Genome	NA	I140	NA	4719401	1	4719401	299767	Enterobacter_ludwigii_(enterobacteria)	Enterobacter_ludwigii	ftp://ftp.ncbi.nlm.nih.gov/genomes/all/GCF/006/385/915/GCF_006385915.1_ASM638591v1	ftp://ftp.ncbi.nlm.nih.gov/genomes/all/GCA/006/385/915/GCA_006385915.1_ASM638591v1	Shandong_Agricultural_University	2019/06/24_00:00	2019/06/24_00:00	2019/06/24_00:00	2019/06/28_00:00	SAMN12026966	assembly	Enterobacter_spp	E_ludwigii	#N/A	-		NA	absent	absent	-	present
SAMN06453372	wood						GCA_002494045.1	ASM249404v1	Scaffold	UBA7037		DLAW01	4719529	93	85582	550	Enterobacter_cloacae_(enterobacteria)	Enterobacter_cloacae	NA	ftp://ftp.ncbi.nlm.nih.gov/genomes/all/GCA/002/494/045/GCA_002494045.1_ASM249404v1	University_of_Queensland	2017/10/10_00:00	2017/10/10_00:00	2017/10/10_00:00	2017/10/10_00:00	SAMN06453372	assembly	Enterobacter_spp	E_kobei	#N/A	-		NA	absent	absent	-	present
SAMN03401403		Oryza_sativa					GCF_001475855.1	ASM147585v1	Contig	NA	NS49	LDQP01	4719851	33	371391	1296536	Enterobacter_hormaechei_subsp._xiangfangensis_(enterobacteria)	Enterobacter_hormaechei	ftp://ftp.ncbi.nlm.nih.gov/genomes/all/GCF/001/475/855/GCF_001475855.1_ASM147585v1	ftp://ftp.ncbi.nlm.nih.gov/genomes/all/GCA/001/475/855/GCA_001475855.1_ASM147585v1	Bacterial_Genomics_and_Evolution_Laboratory,_CSIR-Institute_of_Microbial_Technology,_Sector_39-A,_Chandigarh,_India	2015/12/22_00:00	2015/12/22_00:00	2015/12/22_00:00	2015/12/25_00:00	SAMN03401403	assembly	Enterobacter_spp	E_xiangfangensis	1	809		NA	absent	absent	-	present
SAMN03401395		Oryza_sativa					GCF_001475875.1	ASM147587v1	Contig	NA	NS75	LDQS01	4720133	60	131492	1296536	Enterobacter_hormaechei_subsp._xiangfangensis_(enterobacteria)	Enterobacter_hormaechei	ftp://ftp.ncbi.nlm.nih.gov/genomes/all/GCF/001/475/875/GCF_001475875.1_ASM147587v1	ftp://ftp.ncbi.nlm.nih.gov/genomes/all/GCA/001/475/875/GCA_001475875.1_ASM147587v1	Bacterial_Genomics_and_Evolution_Laboratory,_CSIR-Institute_of_Microbial_Technology,_Sector_39-A,_Chandigarh,_India	2015/12/22_00:00	2015/12/22_00:00	2015/12/22_00:00	2015/12/25_00:00	SAMN03401395	assembly	Enterobacter_spp	E_xiangfangensis	1	809		NA	absent	absent	-	present
SAMD00115663		Homo_sapiens					GCF_003175235.1	ASM317523v1	Contig	NA	TUM10	BGKJ01	4720457	79	256882	550	Enterobacter_cloacae_(enterobacteria)	Enterobacter_cloacae	ftp://ftp.ncbi.nlm.nih.gov/genomes/all/GCF/003/175/235/GCF_003175235.1_ASM317523v1	ftp://ftp.ncbi.nlm.nih.gov/genomes/all/GCA/003/175/235/GCA_003175235.1_ASM317523v1	Toho_University	2018/05/25_00:00	2018/05/29_00:00	2018/05/29_00:00	2018/05/31_00:00	SAMD00115663	assembly	Enterobacter_spp	E_xiangfangensis	1	50		NA	absent	absent	-	present
SAMEA2273477	blood	Homo_sapiens					GCF_900077005.1	12045_5#56	Scaffold	NA	e362	FKDT01	4721010	28	234678	550	Enterobacter_cloacae_(enterobacteria)	Enterobacter_cloacae	ftp://ftp.ncbi.nlm.nih.gov/genomes/all/GCF/900/077/005/GCF_900077005.1_12045_5_56	ftp://ftp.ncbi.nlm.nih.gov/genomes/all/GCA/900/077/005/GCA_900077005.1_12045_5_56	SC	2016/04/13_00:00	2016/05/09_00:00	2016/05/09_00:00	2016/05/13_00:00	SAMEA2273477	assembly	Enterobacter_spp	E_quasiroggenkampii	#N/A	767		NA	absent	absent	-	present
SAMN06454224	metal						GCA_002322225.1	ASM232222v1	Scaffold	UBA1580		DCOC01	4721115	64	112806	158836	Enterobacter_hormaechei_(enterobacteria)	Enterobacter_hormaechei	NA	ftp://ftp.ncbi.nlm.nih.gov/genomes/all/GCA/002/322/225/GCA_002322225.1_ASM232222v1	University_of_Queensland	2017/09/21_00:00	2017/09/21_00:00	2017/09/21_00:00	2017/09/21_00:00	SAMN06454224	assembly	Enterobacter_spp	E_xiangfangensis	2	1119		IncFIB	absent	absent	-	absent
SAMEA104567255	faecal	Homo_sapiens					GCA_902162585.1	25964_2#31	Scaffold	NA	4928STDY7071156	CABGWK01	4721782	260	400148	550	Enterobacter_cloacae_(enterobacteria)	Enterobacter_cloacae	NA	ftp://ftp.ncbi.nlm.nih.gov/genomes/all/GCA/902/162/585/GCA_902162585.1_25964_2_31	SC	2019/07/11_00:00	2019/07/12_00:00	2019/07/12_00:00	2019/07/12_00:00	SAMEA104567255	assembly	Enterobacter_spp	E_xiangfangensis	2	-		NA	absent	absent	-	absent
SAMN06704512	Peritoneal_fluid	Homo_sapiens	ascites		Christiana_Jesumirhewe		GCF_002204945.1	ASM220494v1	Contig	NA	10_14_15	NIZH01	4722136	187	59231	1812934	Enterobacter_hormaechei_subsp._hoffmannii_(enterobacteria)	Enterobacter_hormaechei	ftp://ftp.ncbi.nlm.nih.gov/genomes/all/GCF/002/204/945/GCF_002204945.1_ASM220494v1	ftp://ftp.ncbi.nlm.nih.gov/genomes/all/GCA/002/204/945/GCA_002204945.1_ASM220494v1	Austrian_Agency_for_Health_and_Food_Safety,_Vienna,_Austria	2017/06/22_00:00	2017/06/22_00:00	2017/06/22_00:00	2017/06/24_00:00	SAMN06704512	assembly	Enterobacter_spp	E_xiangfangensis	2	78		IncL/M	absent	absent	-	absent
SAMN10359476		Penaeus_vannamei					GCF_003719615.1	ASM371961v1	Complete_Genome	NA	E3442	NA	4722483	4	4479373	550	Enterobacter_cloacae_(enterobacteria)	Enterobacter_cloacae	ftp://ftp.ncbi.nlm.nih.gov/genomes/all/GCF/003/719/615/GCF_003719615.1_ASM371961v1	ftp://ftp.ncbi.nlm.nih.gov/genomes/all/GCA/003/719/615/GCA_003719615.1_ASM371961v1	Wageningen_Bioveterinary_Research	2018/11/10_00:00	2018/11/10_00:00	2018/11/10_00:00	2018/11/11_00:00	SAMN10359476	assembly	Enterobacter_spp	E_xiangfangensis	3	813		IncR	absent	absent	blaFLC-1,blaIMI-2	absent
SAMN03401396		Oryza_sativa					GCF_001476065.1	ASM147606v1	Contig	NA	NS80	LDQT01	4722787	32	282477	1296536	Enterobacter_hormaechei_subsp._xiangfangensis_(enterobacteria)	Enterobacter_hormaechei	ftp://ftp.ncbi.nlm.nih.gov/genomes/all/GCF/001/476/065/GCF_001476065.1_ASM147606v1	ftp://ftp.ncbi.nlm.nih.gov/genomes/all/GCA/001/476/065/GCA_001476065.1_ASM147606v1	Bacterial_Genomics_and_Evolution_Laboratory,_CSIR-Institute_of_Microbial_Technology,_Sector_39-A,_Chandigarh,_India	2015/12/22_00:00	2015/12/22_00:00	2015/12/22_00:00	2015/12/25_00:00	SAMN03401396	assembly	Enterobacter_spp	E_xiangfangensis	1	809		NA	absent	absent	-	present
SAMN03401401		Oryza_sativa					GCF_001475795.1	ASM147579v1	Contig	NA	NS34	LDQE01	4722850	72	165694	158836	Enterobacter_hormaechei_(enterobacteria)	Enterobacter_hormaechei	ftp://ftp.ncbi.nlm.nih.gov/genomes/all/GCF/001/475/795/GCF_001475795.1_ASM147579v1	ftp://ftp.ncbi.nlm.nih.gov/genomes/all/GCA/001/475/795/GCA_001475795.1_ASM147579v1	Bacterial_Genomics_and_Evolution_Laboratory,_CSIR-Institute_of_Microbial_Technology,_Sector_39-A,_Chandigarh,_India	2015/12/22_00:00	2015/12/22_00:00	2015/12/22_00:00	2019/01/07_00:00	SAMN03401401	assembly	Enterobacter_spp	E_xiangfangensis	1	809		NA	absent	absent	-	present
SAMEA2273335	blood	Homo_sapiens					GCF_900075535.1	11983_6#15	Scaffold	NA	e1337	FJYF01	4723123	68	134978	550	Enterobacter_cloacae_(enterobacteria)	Enterobacter_cloacae	ftp://ftp.ncbi.nlm.nih.gov/genomes/all/GCF/900/075/535/GCF_900075535.1_11983_6_15	ftp://ftp.ncbi.nlm.nih.gov/genomes/all/GCA/900/075/535/GCA_900075535.1_11983_6_15	SC	2016/04/05_00:00	2016/04/06_00:00	2016/04/06_00:00	2016/04/13_00:00	SAMEA2273335	assembly	Enterobacter_spp	E_xiangfangensis	4	108		pENTAS02	absent	absent	-	absent
SAMN08998674	cloaca_swabs_from_commercial_farm	chicken			Beijing_Advanced_Innovation_Center_for_Food_Nutrition_and_Human_Health,_College_of_Veterinary_Medicine,_China_Agricultural_University,_Beijing.		GCF_004136745.1	ASM413674v1	Scaffold	NA	3DZ3S2B	QFLK01	4723251	207	51870	2511983	Enterobacter_cloacae_complex_sp._3DZ3S2B_(enterobacteria)	Enterobacter_cloacae_complex_sp._3DZ3S2B	ftp://ftp.ncbi.nlm.nih.gov/genomes/all/GCF/004/136/745/GCF_004136745.1_ASM413674v1	ftp://ftp.ncbi.nlm.nih.gov/genomes/all/GCA/004/136/745/GCA_004136745.1_ASM413674v1	College_of_Veterinary_Medicine,China_Agricultural_University	2019/02/04_00:00	2019/02/04_00:00	2019/02/04_00:00	2019/02/07_00:00	SAMN08998674	assembly	Enterobacter_spp	E_xiangfangensis	3	994		IncHI2_IncHI2A_IncX3	absent	absent	-	absent
SAMN03401394		Oryza_sativa					GCF_001475645.1	ASM147564v1	Contig	NA	NS64	LDQR01	4723970	76	277091	1296536	Enterobacter_hormaechei_subsp._xiangfangensis_(enterobacteria)	Enterobacter_hormaechei	ftp://ftp.ncbi.nlm.nih.gov/genomes/all/GCF/001/475/645/GCF_001475645.1_ASM147564v1	ftp://ftp.ncbi.nlm.nih.gov/genomes/all/GCA/001/475/645/GCA_001475645.1_ASM147564v1	Bacterial_Genomics_and_Evolution_Laboratory,_CSIR-Institute_of_Microbial_Technology,_Sector_39-A,_Chandigarh,_India	2015/12/22_00:00	2015/12/22_00:00	2015/12/22_00:00	2015/12/25_00:00	SAMN03401394	assembly	Enterobacter_spp	E_xiangfangensis	1	809		NA	absent	absent	-	present
SAMN05581749	missing	Homo_sapiens	missing		missing		GCF_001729705.1	ASM172970v1	Complete_Genome	NA	DSM_16687	NA	4724316	1	4724316	301102	Enterobacter_hormaechei_subsp._oharae_(enterobacteria)	Enterobacter_hormaechei	ftp://ftp.ncbi.nlm.nih.gov/genomes/all/GCF/001/729/705/GCF_001729705.1_ASM172970v1	ftp://ftp.ncbi.nlm.nih.gov/genomes/all/GCA/001/729/705/GCA_001729705.1_ASM172970v1	JCVI	2016/09/16_00:00	2016/09/16_00:00	2016/09/16_00:00	2016/09/19_00:00	SAMN05581749	assembly	Enterobacter_spp	E_xiangfangensis	4	108	yes	NA	absent	absent	-	absent
SAMN05510455	wound	Homo_sapiens	Missing	73	Xiaomin_Zhao		GCF_003186415.1	ASM318641v1	Complete_Genome	NA	234	NA	4724855	2	4656282	158836	Enterobacter_hormaechei_(enterobacteria)	Enterobacter_hormaechei	ftp://ftp.ncbi.nlm.nih.gov/genomes/all/GCF/003/186/415/GCF_003186415.1_ASM318641v1	ftp://ftp.ncbi.nlm.nih.gov/genomes/all/GCA/003/186/415/GCA_003186415.1_ASM318641v1	Brigham_&amp;_Women&apos;s_Hospital	2018/06/05_00:00	2018/06/05_00:00	2018/06/05_00:00	2019/03/07_00:00	SAMN05510455	assembly	Enterobacter_spp	E_xiangfangensis	3	-		FIA_IncFIA_IncR	absent	absent	-	absent
SAMN02983088	wound_swab	Homo_sapiens					GCF_000747015.1	ASM74701v1	Contig	NA	479	JQGO01	4724894	195	61684	158836	Enterobacter_hormaechei_(enterobacteria)	Enterobacter_hormaechei	ftp://ftp.ncbi.nlm.nih.gov/genomes/all/GCF/000/747/015/GCF_000747015.1_ASM74701v1	ftp://ftp.ncbi.nlm.nih.gov/genomes/all/GCA/000/747/015/GCA_000747015.1_ASM74701v1	University_of_Malaya	2014/09/02_00:00	2014/09/24_00:00	2014/09/24_00:00	2019/01/07_00:00	SAMN02983088	assembly	Enterobacter_spp	E_xiangfangensis	1	50		NA	absent	absent	-	present
SAMN09845192		Homo_sapiens					GCF_003986865.1	ASM398686v1	Contig	NA	WCHECl090014	RXQX01	4724937	104	132015	550	Enterobacter_cloacae_(enterobacteria)	Enterobacter_cloacae	ftp://ftp.ncbi.nlm.nih.gov/genomes/all/GCF/003/986/865/GCF_003986865.1_ASM398686v1	ftp://ftp.ncbi.nlm.nih.gov/genomes/all/GCA/003/986/865/GCA_003986865.1_ASM398686v1	West_China_Hospital,_Sichuan_University	2018/12/23_00:00	2018/12/31_00:00	2018/12/31_00:00	2019/01/02_00:00	SAMN09845192	assembly	Enterobacter_spp	E_cloacae	#N/A	922		NA	absent	absent	-	present
SAMN10523733	Unknown	Unknown	Unknown		Unknown		GCF_003968775.1	ASM396877v1	Contig	NA	AP039	RXYL01	4724991	129	89352	1812935	Enterobacter_roggenkampii_(enterobacteria)	Enterobacter_roggenkampii	ftp://ftp.ncbi.nlm.nih.gov/genomes/all/GCF/003/968/775/GCF_003968775.1_ASM396877v1	ftp://ftp.ncbi.nlm.nih.gov/genomes/all/GCA/003/968/775/GCA_003968775.1_ASM396877v1	JCVI	2018/12/24_00:00	2018/12/24_00:00	2018/12/24_00:00	2018/12/28_00:00	SAMN10523733	assembly	Enterobacter_spp	E_roggenkampii	#N/A	-		IncR	absent	absent	-	present
SAMEA2273485	blood	Homo_sapiens					GCF_900075145.1	12045_5#62	Scaffold	NA	e1026	FJWD01	4725159	27	494790	550	Enterobacter_cloacae_(enterobacteria)	Enterobacter_cloacae	ftp://ftp.ncbi.nlm.nih.gov/genomes/all/GCF/900/075/145/GCF_900075145.1_12045_5_62	ftp://ftp.ncbi.nlm.nih.gov/genomes/all/GCA/900/075/145/GCA_900075145.1_12045_5_62	SC	2016/04/04_00:00	2016/04/06_00:00	2016/04/06_00:00	2016/04/12_00:00	SAMEA2273485	assembly	Enterobacter_spp	E_ludwigii	#N/A	14		IncFIB_IncFII	absent	absent	-	present
SAMN03401405		Oryza_sativa					GCF_001476035.1	ASM147603v1	Contig	NA	NS371	LDQO01	4725300	30	345357	1296536	Enterobacter_hormaechei_subsp._xiangfangensis_(enterobacteria)	Enterobacter_hormaechei	ftp://ftp.ncbi.nlm.nih.gov/genomes/all/GCF/001/476/035/GCF_001476035.1_ASM147603v1	ftp://ftp.ncbi.nlm.nih.gov/genomes/all/GCA/001/476/035/GCA_001476035.1_ASM147603v1	Bacterial_Genomics_and_Evolution_Laboratory,_CSIR-Institute_of_Microbial_Technology,_Sector_39-A,_Chandigarh,_India	2015/12/22_00:00	2015/12/22_00:00	2015/12/22_00:00	2015/12/25_00:00	SAMN03401405	assembly	Enterobacter_spp	E_xiangfangensis	1	809		NA	absent	absent	-	present
SAMN02603959							GCF_000286275.1	ASM28627v1	Complete_Genome	NA	ENHKU01	NA	4726582	1	4726582	208224	Enterobacter_kobei_(enterobacteria)	Enterobacter_kobei	ftp://ftp.ncbi.nlm.nih.gov/genomes/all/GCF/000/286/275/GCF_000286275.1_ASM28627v1	ftp://ftp.ncbi.nlm.nih.gov/genomes/all/GCA/000/286/275/GCA_000286275.1_ASM28627v1	The_University_of_Hong_Kong	2012/08/10_00:00	2012/08/10_00:00	2012/08/10_00:00	2019/03/07_00:00	SAMN02603959	assembly	Enterobacter_spp	E_kobei	#N/A	3		NA	absent	absent	-	present
SAMN07448209	rectal	Homo_sapiens	None_(screening_isolate)		Koh_Tse_Hsien,_Singapore_General_Hospital		GCF_002278205.1	ASM227820v1	Scaffold	NA	DS36577	NPNJ01	4726972	53	201582	550	Enterobacter_cloacae_(enterobacteria)	Enterobacter_cloacae	ftp://ftp.ncbi.nlm.nih.gov/genomes/all/GCF/002/278/205/GCF_002278205.1_ASM227820v1	ftp://ftp.ncbi.nlm.nih.gov/genomes/all/GCA/002/278/205/GCA_002278205.1_ASM227820v1	National_University_of_Singapore_and_Genome_Institute_of_Singapore	2017/08/30_00:00	2017/08/30_00:00	2017/08/30_00:00	2017/09/01_00:00	SAMN07448209	assembly	Enterobacter_spp	E_sichuanensis	#N/A	-		NA	absent	absent	blaIMI-1	present
SAMN04572599	Unknown	Homo_sapiens	Bloodstream_infection		Vance_Fowler		GCF_001631045.1	ASM163104v1	Contig	NA	GN05334	LVUA01	4728023	144	52555	299766	Enterobacter_hormaechei_subsp._steigerwaltii_(enterobacteria)	Enterobacter_hormaechei	ftp://ftp.ncbi.nlm.nih.gov/genomes/all/GCF/001/631/045/GCF_001631045.1_ASM163104v1	ftp://ftp.ncbi.nlm.nih.gov/genomes/all/GCA/001/631/045/GCA_001631045.1_ASM163104v1	JCVI	2016/04/25_00:00	2016/04/25_00:00	2016/04/25_00:00	2016/04/26_00:00	SAMN04572599	assembly	Enterobacter_spp	E_xiangfangensis	1	-		NA	absent	absent	-	present
SAMN03401389		Oryza_sativa					GCF_001475805.1	ASM147580v1	Contig	NA	NS7	LDQF01	4728267	70	235927	158836	Enterobacter_hormaechei_(enterobacteria)	Enterobacter_hormaechei	ftp://ftp.ncbi.nlm.nih.gov/genomes/all/GCF/001/475/805/GCF_001475805.1_ASM147580v1	ftp://ftp.ncbi.nlm.nih.gov/genomes/all/GCA/001/475/805/GCA_001475805.1_ASM147580v1	Bacterial_Genomics_and_Evolution_Laboratory,_CSIR-Institute_of_Microbial_Technology,_Sector_39-A,_Chandigarh,_India	2015/12/22_00:00	2015/12/22_00:00	2015/12/22_00:00	2019/01/04_00:00	SAMN03401389	assembly	Enterobacter_spp	E_xiangfangensis	1	809		NA	absent	absent	-	present
SAMEA2273483	blood	Homo_sapiens					GCF_900077995.1	12082_4#57	Scaffold	NA	e888	FKHL01	4728715	59	162616	550	Enterobacter_cloacae_(enterobacteria)	Enterobacter_cloacae	ftp://ftp.ncbi.nlm.nih.gov/genomes/all/GCF/900/077/995/GCF_900077995.1_12082_4_57	ftp://ftp.ncbi.nlm.nih.gov/genomes/all/GCA/900/077/995/GCA_900077995.1_12082_4_57	SC	2016/04/13_00:00	2016/05/09_00:00	2016/05/09_00:00	2016/05/14_00:00	SAMEA2273483	assembly	Enterobacter_spp	E_xiangfangensis	2	135		NA	absent	absent	-	absent
SAMN07448198	stool	Homo_sapiens	None_(screening_isolate)		Koh_Tse_Hsien,_Singapore_General_Hospital		GCF_002278375.1	ASM227837v1	Scaffold	NA	DS18454	NPNU01	4729543	52	188808	550	Enterobacter_cloacae_(enterobacteria)	Enterobacter_cloacae	ftp://ftp.ncbi.nlm.nih.gov/genomes/all/GCF/002/278/375/GCF_002278375.1_ASM227837v1	ftp://ftp.ncbi.nlm.nih.gov/genomes/all/GCA/002/278/375/GCA_002278375.1_ASM227837v1	National_University_of_Singapore_and_Genome_Institute_of_Singapore	2017/08/30_00:00	2017/08/30_00:00	2017/08/30_00:00	2017/09/01_00:00	SAMN07448198	assembly	Enterobacter_spp	E_sichuanensis	#N/A	-		NA	absent	absent	blaIMI-4	present
SAMN06452222	plastic						GCA_002453505.1	ASM245350v1	Scaffold	UBA6755		DKHB01	4729654	69	222481	158836	Enterobacter_hormaechei_(enterobacteria)	Enterobacter_hormaechei	NA	ftp://ftp.ncbi.nlm.nih.gov/genomes/all/GCA/002/453/505/GCA_002453505.1_ASM245350v1	University_of_Queensland	2017/10/05_00:00	2017/10/05_00:00	2017/10/05_00:00	2017/10/05_00:00	SAMN06452222	assembly	Enterobacter_spp	E_xiangfangensis	1	-		NA	absent	absent	-	present
SAMN03261528	Water_from_farm				Vet_Food_Agro_Diagnostics_(M)_Sdn_Bhd		GCF_000812505.1	ASM81250v1	Contig	NA	GN6	JWPX01	4729945	116	113393	550	Enterobacter_cloacae_(enterobacteria)	Enterobacter_cloacae	ftp://ftp.ncbi.nlm.nih.gov/genomes/all/GCF/000/812/505/GCF_000812505.1_ASM81250v1	ftp://ftp.ncbi.nlm.nih.gov/genomes/all/GCA/000/812/505/GCA_000812505.1_ASM81250v1	University_of_Malaya	2014/12/31_00:00	2014/12/31_00:00	2014/12/31_00:00	2015/01/05_00:00	SAMN03261528	assembly	Enterobacter_spp	E_cloacae	#N/A	717		NA	absent	absent	-	present
SAMN03401402		Oryza_sativa					GCF_001476055.1	ASM147605v1	Contig	NA	NS57	LDQQ01	4730229	44	265382	1296536	Enterobacter_hormaechei_subsp._xiangfangensis_(enterobacteria)	Enterobacter_hormaechei	ftp://ftp.ncbi.nlm.nih.gov/genomes/all/GCF/001/476/055/GCF_001476055.1_ASM147605v1	ftp://ftp.ncbi.nlm.nih.gov/genomes/all/GCA/001/476/055/GCA_001476055.1_ASM147605v1	Bacterial_Genomics_and_Evolution_Laboratory,_CSIR-Institute_of_Microbial_Technology,_Sector_39-A,_Chandigarh,_India	2015/12/22_00:00	2015/12/22_00:00	2015/12/22_00:00	2015/12/25_00:00	SAMN03401402	assembly	Enterobacter_spp	E_xiangfangensis	1	809		NA	absent	absent	-	present
SAMN10523724	Unknown	Unknown	Unknown		Unknown		GCF_003970125.1	ASM397012v1	Contig	NA	AP40	RXYU01	4730477	127	93620	1812935	Enterobacter_roggenkampii_(enterobacteria)	Enterobacter_roggenkampii	ftp://ftp.ncbi.nlm.nih.gov/genomes/all/GCF/003/970/125/GCF_003970125.1_ASM397012v1	ftp://ftp.ncbi.nlm.nih.gov/genomes/all/GCA/003/970/125/GCA_003970125.1_ASM397012v1	JCVI	2018/12/24_00:00	2018/12/25_00:00	2018/12/25_00:00	2018/12/28_00:00	SAMN10523724	assembly	Enterobacter_spp	E_roggenkampii	#N/A	-		IncR	absent	absent	-	present
SAMN09845211		Homo_sapiens					GCF_003965575.1	ASM396557v1	Contig	NA	WCHEA090034	RXRP01	4730697	32	357693	61645	Enterobacter_asburiae_(enterobacteria)	Enterobacter_asburiae	ftp://ftp.ncbi.nlm.nih.gov/genomes/all/GCF/003/965/575/GCF_003965575.1_ASM396557v1	ftp://ftp.ncbi.nlm.nih.gov/genomes/all/GCA/003/965/575/GCA_003965575.1_ASM396557v1	West_China_Hospital,_Sichuan_University	2018/12/23_00:00	2018/12/23_00:00	2018/12/23_00:00	2018/12/28_00:00	SAMN09845211	assembly	Enterobacter_spp	E_dykesii	#N/A	-		IncFIA_IncFIB_IncFII	absent	absent	-	present
SAMN08932717	Missing						GCF_003965555.1	ASM396555v1	Contig	NA	WCHEA045189	RXPX01	4730828	32	357693	61645	Enterobacter_asburiae_(enterobacteria)	Enterobacter_asburiae	ftp://ftp.ncbi.nlm.nih.gov/genomes/all/GCF/003/965/555/GCF_003965555.1_ASM396555v1	ftp://ftp.ncbi.nlm.nih.gov/genomes/all/GCA/003/965/555/GCA_003965555.1_ASM396555v1	West_China_Hospital,_Sichuan_University	2018/12/23_00:00	2018/12/23_00:00	2018/12/23_00:00	2018/12/28_00:00	SAMN08932717	assembly	Enterobacter_spp	E_dykesii	#N/A	-		IncFIA_IncFIB_IncFII	absent	absent	-	present
SAMN03401398		Oryza_sativa					GCF_001475615.1	ASM147561v1	Contig	NA	NS19	LDQK01	4731803	75	347372	1296536	Enterobacter_hormaechei_subsp._xiangfangensis_(enterobacteria)	Enterobacter_hormaechei	ftp://ftp.ncbi.nlm.nih.gov/genomes/all/GCF/001/475/615/GCF_001475615.1_ASM147561v1	ftp://ftp.ncbi.nlm.nih.gov/genomes/all/GCA/001/475/615/GCA_001475615.1_ASM147561v1	Bacterial_Genomics_and_Evolution_Laboratory,_CSIR-Institute_of_Microbial_Technology,_Sector_39-A,_Chandigarh,_India	2015/12/22_00:00	2015/12/22_00:00	2015/12/22_00:00	2015/12/25_00:00	SAMN03401398	assembly	Enterobacter_spp	E_xiangfangensis	1	809		NA	absent	absent	-	present
SAMEA2273421	blood	Homo_sapiens					GCF_900076255.1	12045_5#1	Scaffold	NA	e1873	FKAZ01	4732212	41	251696	550	Enterobacter_cloacae_(enterobacteria)	Enterobacter_cloacae	ftp://ftp.ncbi.nlm.nih.gov/genomes/all/GCF/900/076/255/GCF_900076255.1_12045_5_1	ftp://ftp.ncbi.nlm.nih.gov/genomes/all/GCA/900/076/255/GCA_900076255.1_12045_5_1	SC	2016/04/04_00:00	2016/04/06_00:00	2016/04/06_00:00	2016/04/13_00:00	SAMEA2273421	assembly	Enterobacter_spp	E_xiangfangensis	3	114		NA	absent	absent	-	absent
SAMN06887342	missing	missing					GCF_003186565.1	ASM318656v1	Complete_Genome	NA	388	NA	4735287	2	4656223	158836	Enterobacter_hormaechei_(enterobacteria)	Enterobacter_hormaechei	ftp://ftp.ncbi.nlm.nih.gov/genomes/all/GCF/003/186/565/GCF_003186565.1_ASM318656v1	ftp://ftp.ncbi.nlm.nih.gov/genomes/all/GCA/003/186/565/GCA_003186565.1_ASM318656v1	Brigham_&amp;_Women&apos;s_Hospital	2018/06/05_00:00	2018/06/05_00:00	2018/06/05_00:00	2019/03/07_00:00	SAMN06887342	assembly	Enterobacter_spp	E_xiangfangensis	3	-		FIA_IncFIA_IncR	absent	absent	blaNDM-5	absent
SAMN02138564	Tissue	missing					GCF_000493015.1	Ente_cloa_complex_MGH_24_V1	Scaffold	NA	MGH_24	AYJG01	4736514	4	1822932	1329828	Enterobacter_sp._MGH_24_(enterobacteria)	Enterobacter_sp._MGH_24	ftp://ftp.ncbi.nlm.nih.gov/genomes/all/GCF/000/493/015/GCF_000493015.1_Ente_cloa_complex_MGH_24_V1	ftp://ftp.ncbi.nlm.nih.gov/genomes/all/GCA/000/493/015/GCA_000493015.1_Ente_cloa_complex_MGH_24_V1	Broad_Institute	2013/10/30_00:00	2013/10/30_00:00	2013/10/30_00:00	2014/10/09_00:00	SAMN02138564	assembly	Enterobacter_spp	Unidentified-4	#N/A	727		NA	absent	absent	-	present
SAMN03401391		Oryza_sativa					GCF_001476005.1	ASM147600v1	Contig	NA	NS28	LDQM01	4736757	38	431385	1296536	Enterobacter_hormaechei_subsp._xiangfangensis_(enterobacteria)	Enterobacter_hormaechei	ftp://ftp.ncbi.nlm.nih.gov/genomes/all/GCF/001/476/005/GCF_001476005.1_ASM147600v1	ftp://ftp.ncbi.nlm.nih.gov/genomes/all/GCA/001/476/005/GCA_001476005.1_ASM147600v1	Bacterial_Genomics_and_Evolution_Laboratory,_CSIR-Institute_of_Microbial_Technology,_Sector_39-A,_Chandigarh,_India	2015/12/22_00:00	2015/12/22_00:00	2015/12/22_00:00	2015/12/25_00:00	SAMN03401391	assembly	Enterobacter_spp	E_xiangfangensis	1	809		NA	absent	absent	-	present
SAMN06454341	metal/plastic						GCA_002500825.1	ASM250082v1	Scaffold	UBA7842		DLTG01	4737770	42	227417	158836	Enterobacter_hormaechei_(enterobacteria)	Enterobacter_hormaechei	NA	ftp://ftp.ncbi.nlm.nih.gov/genomes/all/GCA/002/500/825/GCA_002500825.1_ASM250082v1	University_of_Queensland	2017/10/10_00:00	2017/10/10_00:00	2017/10/10_00:00	2017/10/10_00:00	SAMN06454341	assembly	Enterobacter_spp	E_xiangfangensis	1	-		NA	absent	absent	-	present
SAMN06454326	metal						GCA_002434585.1	ASM243458v1	Scaffold	UBA6545		DJKJ01	4737802	33	256669	158836	Enterobacter_hormaechei_(enterobacteria)	Enterobacter_hormaechei	NA	ftp://ftp.ncbi.nlm.nih.gov/genomes/all/GCA/002/434/585/GCA_002434585.1_ASM243458v1	University_of_Queensland	2017/10/04_00:00	2017/10/04_00:00	2017/10/04_00:00	2017/10/04_00:00	SAMN06454326	assembly	Enterobacter_spp	E_xiangfangensis	1	-		NA	absent	absent	-	present
SAMEA104567262	faecal	Homo_sapiens					GCA_902166535.1	25964_2#37	Chromosome	NA	4928STDY7071163	NA	4738893	115	69715	550	Enterobacter_cloacae_(enterobacteria)	Enterobacter_cloacae	NA	ftp://ftp.ncbi.nlm.nih.gov/genomes/all/GCA/902/166/535/GCA_902166535.1_25964_2_37	SC	2019/07/09_00:00	2019/07/12_00:00	2019/07/12_00:00	2019/07/13_00:00	SAMEA104567262	assembly	Enterobacter_spp	E_xiangfangensis	2	268		NA	absent	absent	-	absent
SAMEA5852006	human_gut						GCF_902387805.1	UHGG_MGYG-HGUT-02501	Scaffold	MGYG-HGUT-02501		CABMNG01	4738949	167	167061	550	Enterobacter_cloacae_(enterobacteria)	Enterobacter_cloacae	NA	ftp://ftp.ncbi.nlm.nih.gov/genomes/all/GCA/902/387/805/GCA_902387805.1_UHGG_MGYG-HGUT-02501	EMG	2019/08/16_00:00	2019/08/17_00:00	2019/08/17_00:00	2019/08/23_00:00	SAMEA5852006	assembly	Enterobacter_spp	E_vonholyi	#N/A	1067		NA	absent	absent	-	present
SAMN09435824	human_gut	Homo_sapiens	Not_available		French_National_Reference_Center_for_Antibiotic_Resistance		GCF_003289275.1	ASM328927v1	Scaffold	NA	148H3	QMCS01	4738949	167	167061	550	Enterobacter_cloacae_(enterobacteria)	Enterobacter_cloacae	ftp://ftp.ncbi.nlm.nih.gov/genomes/all/GCF/003/289/275/GCF_003289275.1_ASM328927v1	ftp://ftp.ncbi.nlm.nih.gov/genomes/all/GCA/003/289/275/GCA_003289275.1_ASM328927v1	CHU_de_Bicetre	2018/07/06_00:00	2018/07/06_00:00	2018/07/06_00:00	2018/07/11_00:00	SAMN09435824	assembly	Enterobacter_spp	E_vonholyi	#N/A	1067		NA	absent	absent	-	present
SAMD00159214							GCF_005405605.1	ASM540560v1	Contig	NA	42-12	BJEX01	4739953	31	451239	208224	Enterobacter_kobei_(enterobacteria)	Enterobacter_kobei	ftp://ftp.ncbi.nlm.nih.gov/genomes/all/GCF/005/405/605/GCF_005405605.1_ASM540560v1	ftp://ftp.ncbi.nlm.nih.gov/genomes/all/GCA/005/405/605/GCA_005405605.1_ASM540560v1	Laboratory_of_food_microbiology,_Department_of_food_science_and_technology,_Tokyo_university_of_marine_science_and_technology	2019/04/17_00:00	2019/05/15_00:00	2019/05/15_00:00	2019/05/21_00:00	SAMD00159214	assembly	Enterobacter_spp	E_kobei	#N/A	56		IncFII	absent	absent	-	present
SAMEA2273155	blood	Homo_sapiens					GCF_900076995.1	12045_4#33	Scaffold	NA	e352	FKDS01	4743528	60	172678	550	Enterobacter_cloacae_(enterobacteria)	Enterobacter_cloacae	ftp://ftp.ncbi.nlm.nih.gov/genomes/all/GCF/900/076/995/GCF_900076995.1_12045_4_33	ftp://ftp.ncbi.nlm.nih.gov/genomes/all/GCA/900/076/995/GCA_900076995.1_12045_4_33	SC	2016/04/13_00:00	2016/05/09_00:00	2016/05/09_00:00	2016/05/14_00:00	SAMEA2273155	assembly	Enterobacter_spp	E_xiangfangensis	4	68		IncR_pENTAS02	absent	absent	-	absent
SAMEA2273340	blood	Homo_sapiens					GCF_900075585.1	11983_6#19	Scaffold	NA	e1345	FJYK01	4743924	128	111171	550	Enterobacter_cloacae_(enterobacteria)	Enterobacter_cloacae	ftp://ftp.ncbi.nlm.nih.gov/genomes/all/GCF/900/075/585/GCF_900075585.1_11983_6_19	ftp://ftp.ncbi.nlm.nih.gov/genomes/all/GCA/900/075/585/GCA_900075585.1_11983_6_19	SC	2016/04/05_00:00	2016/04/06_00:00	2016/04/06_00:00	2016/04/13_00:00	SAMEA2273340	assembly	Enterobacter_spp	E_xiangfangensis	2	97		IncFIB_IncFII	absent	absent	-	absent
SAMEA2273338	blood	Homo_sapiens					GCF_900075565.1	12082_4#47	Scaffold	NA	e1342	FJYI01	4744423	80	123753	550	Enterobacter_cloacae_(enterobacteria)	Enterobacter_cloacae	ftp://ftp.ncbi.nlm.nih.gov/genomes/all/GCF/900/075/565/GCF_900075565.1_12082_4_47	ftp://ftp.ncbi.nlm.nih.gov/genomes/all/GCA/900/075/565/GCA_900075565.1_12082_4_47	SC	2016/04/04_00:00	2016/04/06_00:00	2016/04/06_00:00	2016/04/08_00:00	SAMEA2273338	assembly	Enterobacter_spp	E_bugandensis	#N/A	791		NA	absent	absent	-	present
SAMN02138566	urine	missing					GCF_000492975.1	Ente_cloa_complex_MGH_26_V1	Scaffold	NA	MGH_26	AYJE01	4745120	11	749881	1329830	Enterobacter_sp._MGH_26_(enterobacteria)	Enterobacter_hormaechei	ftp://ftp.ncbi.nlm.nih.gov/genomes/all/GCF/000/492/975/GCF_000492975.1_Ente_cloa_complex_MGH_26_V1	ftp://ftp.ncbi.nlm.nih.gov/genomes/all/GCA/000/492/975/GCA_000492975.1_Ente_cloa_complex_MGH_26_V1	Broad_Institute	2013/10/30_00:00	2013/10/30_00:00	2013/10/30_00:00	2014/10/09_00:00	SAMN02138566	assembly	Enterobacter_spp	E_xiangfangensis	2	78		IncFIB	absent	absent	-	absent
SAMEA2273456	blood	Homo_sapiens					GCF_900076585.1	12045_5#35	Scaffold	NA	e2414	FKCC01	4745283	62	187441	550	Enterobacter_cloacae_(enterobacteria)	Enterobacter_cloacae	ftp://ftp.ncbi.nlm.nih.gov/genomes/all/GCF/900/076/585/GCF_900076585.1_12045_5_35	ftp://ftp.ncbi.nlm.nih.gov/genomes/all/GCA/900/076/585/GCA_900076585.1_12045_5_35	SC	2016/04/13_00:00	2016/05/09_00:00	2016/05/09_00:00	2016/05/14_00:00	SAMEA2273456	assembly	Enterobacter_spp	E_asburiae	#N/A	162		repA	absent	absent	-	present
SAMN03283633	Unknown	Unknown	Unknown		Barry_Kreiswirth		GCF_000956805.1	ASM95680v1	Contig	NA	34980	LAAN01	4745296	47	252735	299766	Enterobacter_hormaechei_subsp._steigerwaltii_(enterobacteria)	Enterobacter_hormaechei	ftp://ftp.ncbi.nlm.nih.gov/genomes/all/GCF/000/956/805/GCF_000956805.1_ASM95680v1	ftp://ftp.ncbi.nlm.nih.gov/genomes/all/GCA/000/956/805/GCA_000956805.1_ASM95680v1	JCVI	2015/03/19_00:00	2015/03/19_00:00	2015/03/19_00:00	2016/06/23_00:00	SAMN03283633	assembly	Enterobacter_spp	E_xiangfangensis	1	604		NA	absent	absent	-	present
SAMEA2273242	blood	Homo_sapiens					GCF_900077795.1	11983_7#17	Scaffold	NA	e811	FKGR01	4745776	36	352310	550	Enterobacter_cloacae_(enterobacteria)	Enterobacter_cloacae	ftp://ftp.ncbi.nlm.nih.gov/genomes/all/GCF/900/077/795/GCF_900077795.1_11983_7_17	ftp://ftp.ncbi.nlm.nih.gov/genomes/all/GCA/900/077/795/GCA_900077795.1_11983_7_17	SC	2016/04/13_00:00	2016/05/09_00:00	2016/05/09_00:00	2016/05/14_00:00	SAMEA2273242	assembly	Enterobacter_spp	E_xiangfangensis	1	-		NA	absent	absent	-	present
SAMN03197770	missing	Homo_sapiens	missing		UW_clinical_laboratory		GCF_001057375.1	ASM105737v1	Scaffold	NA	569_ECLO	JVBS01	4745960	69	143072	299766	Enterobacter_hormaechei_subsp._steigerwaltii_(enterobacteria)	Enterobacter_hormaechei	ftp://ftp.ncbi.nlm.nih.gov/genomes/all/GCF/001/057/375/GCF_001057375.1_ASM105737v1	ftp://ftp.ncbi.nlm.nih.gov/genomes/all/GCA/001/057/375/GCA_001057375.1_ASM105737v1	University_of_Washington	2015/07/10_00:00	2015/07/10_00:00	2015/07/10_00:00	2016/07/19_00:00	SAMN03197770	assembly	Enterobacter_spp	E_xiangfangensis	1	554		NA	absent	absent	-	present
SAMEA2273163	blood	Homo_sapiens					GCF_900077085.1	12045_4#40	Scaffold	NA	e404	FKDZ01	4746288	88	90132	550	Enterobacter_cloacae_(enterobacteria)	Enterobacter_cloacae	ftp://ftp.ncbi.nlm.nih.gov/genomes/all/GCF/900/077/085/GCF_900077085.1_12045_4_40	ftp://ftp.ncbi.nlm.nih.gov/genomes/all/GCA/900/077/085/GCA_900077085.1_12045_4_40	SC	2016/04/13_00:00	2016/05/09_00:00	2016/05/09_00:00	2016/05/14_00:00	SAMEA2273163	assembly	Enterobacter_spp	E_xiangfangensis	2	-		IncFIB_IncFII_IncN_IncR	absent	absent	-	absent
SAMEA2273496	blood	Homo_sapiens					GCF_900077095.1	12045_5#70	Scaffold	NA	e405	FKEA01	4747322	102	90129	550	Enterobacter_cloacae_(enterobacteria)	Enterobacter_cloacae	ftp://ftp.ncbi.nlm.nih.gov/genomes/all/GCF/900/077/095/GCF_900077095.1_12045_5_70	ftp://ftp.ncbi.nlm.nih.gov/genomes/all/GCA/900/077/095/GCA_900077095.1_12045_5_70	SC	2016/04/13_00:00	2016/05/09_00:00	2016/05/09_00:00	2016/05/14_00:00	SAMEA2273496	assembly	Enterobacter_spp	E_xiangfangensis	2	-		IncFIB_IncFII_IncN_IncR	absent	absent	-	absent
SAMEA2273232	blood	Homo_sapiens					GCF_900077675.1	11983_7#6	Scaffold	NA	e772	FKGF01	4747370	37	184158	550	Enterobacter_cloacae_(enterobacteria)	Enterobacter_cloacae	ftp://ftp.ncbi.nlm.nih.gov/genomes/all/GCF/900/077/675/GCF_900077675.1_11983_7_6	ftp://ftp.ncbi.nlm.nih.gov/genomes/all/GCA/900/077/675/GCA_900077675.1_11983_7_6	SC	2016/04/13_00:00	2016/05/09_00:00	2016/05/09_00:00	2016/05/14_00:00	SAMEA2273232	assembly	Enterobacter_spp	E_kobei	#N/A	-		IncFII	absent	absent	-	present
SAMN05880521	missing	not_applicable					GCF_003635055.1	ASM363505v1	Scaffold	NA	WPR_3_1	RBXU01	4747619	18	521959	1907355	Enterobacter_sp._WPR_3_1_(enterobacteria)	Enterobacter_sp._WPR_3_1	ftp://ftp.ncbi.nlm.nih.gov/genomes/all/GCF/003/635/055/GCF_003635055.1_ASM363505v1	ftp://ftp.ncbi.nlm.nih.gov/genomes/all/GCA/003/635/055/GCA_003635055.1_ASM363505v1	DOE_Joint_Genome_Institute	2018/10/11_00:00	2018/10/11_00:00	2018/10/11_00:00	2018/12/25_00:00	SAMN05880521	assembly	Enterobacter_spp	E_ludwigii	#N/A	-		NA	absent	absent	-	present
SAMN04252925	Unknown	Homo_sapiens	clinical_or_host-associated_bacteria	44_years	Johann_Pitout		GCF_001472635.1	SMART_685.v1	Contig	NA	SMART_685	LPPJ01	4748501	44	378432	299766	Enterobacter_hormaechei_subsp._steigerwaltii_(enterobacteria)	Enterobacter_hormaechei	ftp://ftp.ncbi.nlm.nih.gov/genomes/all/GCF/001/472/635/GCF_001472635.1_SMART_685.v1	ftp://ftp.ncbi.nlm.nih.gov/genomes/all/GCA/001/472/635/GCA_001472635.1_SMART_685.v1	JCVI	2015/12/21_00:00	2015/12/21_00:00	2015/12/21_00:00	2015/12/24_00:00	SAMN04252925	assembly	Enterobacter_spp	E_xiangfangensis	1	521		IncL/M	absent	absent	-	present
SAMN03732700	bodily_fluid	Homo_sapiens			Vance_Fowler		GCF_001022355.1	ASM102235v1	Contig	NA	GN02366	LEEC01	4749495	30	536085	208224	Enterobacter_kobei_(enterobacteria)	Enterobacter_kobei	ftp://ftp.ncbi.nlm.nih.gov/genomes/all/GCF/001/022/355/GCF_001022355.1_ASM102235v1	ftp://ftp.ncbi.nlm.nih.gov/genomes/all/GCA/001/022/355/GCA_001022355.1_ASM102235v1	JCVI	2015/06/09_00:00	2015/06/09_00:00	2015/06/09_00:00	2016/07/07_00:00	SAMN03732700	assembly	Enterobacter_spp	E_kobei	#N/A	3		NA	absent	absent	-	present
SAMN03277190	excreted_bodily_substance	Homo_sapiens			CIDEIM		GCF_000965815.1	ASM96581v1	Contig	NA	CIDEIMsCOL3	JZKN01	4749599	60	206537	299766	Enterobacter_hormaechei_subsp._steigerwaltii_(enterobacteria)	Enterobacter_hormaechei	ftp://ftp.ncbi.nlm.nih.gov/genomes/all/GCF/000/965/815/GCF_000965815.1_ASM96581v1	ftp://ftp.ncbi.nlm.nih.gov/genomes/all/GCA/000/965/815/GCA_000965815.1_ASM96581v1	JCVI	2015/03/30_00:00	2015/03/30_00:00	2015/03/30_00:00	2016/06/23_00:00	SAMN03277190	assembly	Enterobacter_spp	E_xiangfangensis	1	711		NA	absent	absent	blaKPC-2	present
SAMN08737248		Homo_sapiens					GCF_003056905.1	ASM305690v1	Contig	NA	AUH-ENM7	PYHC01	4750050	104	180638	158836	Enterobacter_hormaechei_(enterobacteria)	Enterobacter_hormaechei	ftp://ftp.ncbi.nlm.nih.gov/genomes/all/GCF/003/056/905/GCF_003056905.1_ASM305690v1	ftp://ftp.ncbi.nlm.nih.gov/genomes/all/GCA/003/056/905/GCA_003056905.1_ASM305690v1	Lebanese_American_University	2018/04/18_00:00	2018/04/18_00:00	2018/04/18_00:00	2019/01/07_00:00	SAMN08737248	assembly	Enterobacter_spp	E_xiangfangensis	1	50		rep21_repUS13	absent	absent	-	present
SAMN03283645	Unknown	Unknown	Unknown		Barry_Kreiswirth		GCF_000957315.1	ASM95731v1	Contig	NA	43444	JZYC01	4750405	58	302281	1812935	Enterobacter_roggenkampii_(enterobacteria)	Enterobacter_roggenkampii	ftp://ftp.ncbi.nlm.nih.gov/genomes/all/GCF/000/957/315/GCF_000957315.1_ASM95731v1	ftp://ftp.ncbi.nlm.nih.gov/genomes/all/GCA/000/957/315/GCA_000957315.1_ASM95731v1	JCVI	2015/03/19_00:00	2015/03/19_00:00	2015/03/19_00:00	2016/07/19_00:00	SAMN03283645	assembly	Enterobacter_spp	E_roggenkampii	#N/A	466		IncFIB	absent	absent	-	present
SAMN11349925	blood	Homo_sapiens	blood-stream_infection		R-Net		GCF_004804395.1	ASM480439v1	Complete_Genome	NA	1367	NA	4750456	1	4750456	881260	Enterobacter_bugandensis_(enterobacteria)	Enterobacter_bugandensis	ftp://ftp.ncbi.nlm.nih.gov/genomes/all/GCF/004/804/395/GCF_004804395.1_ASM480439v1	ftp://ftp.ncbi.nlm.nih.gov/genomes/all/GCA/004/804/395/GCA_004804395.1_ASM480439v1	Justus-Liebig_University	2019/04/23_00:00	2019/04/23_00:00	2019/04/23_00:00	2019/04/25_00:00	SAMN11349925	assembly	Enterobacter_spp	E_bugandensis	#N/A	795		NA	absent	absent	-	present
SAMN03197635	missing	Homo_sapiens	missing		UW_clinical_laboratory		GCF_001056795.1	ASM105679v1	Scaffold	NA	443_ECLO	JVGX01	4751540	50	143144	299766	Enterobacter_hormaechei_subsp._steigerwaltii_(enterobacteria)	Enterobacter_hormaechei	ftp://ftp.ncbi.nlm.nih.gov/genomes/all/GCF/001/056/795/GCF_001056795.1_ASM105679v1	ftp://ftp.ncbi.nlm.nih.gov/genomes/all/GCA/001/056/795/GCA_001056795.1_ASM105679v1	University_of_Washington	2015/07/10_00:00	2015/07/10_00:00	2015/07/10_00:00	2016/07/19_00:00	SAMN03197635	assembly	Enterobacter_spp	E_xiangfangensis	1	554		NA	absent	absent	-	present
SAMN03197373	missing	Homo_sapiens	missing		UW_clinical_laboratory		GCF_001055645.1	ASM105564v1	Scaffold	NA	182_ECLO	JVQZ01	4751599	75	137340	881260	Enterobacter_bugandensis_(enterobacteria)	Enterobacter_bugandensis	ftp://ftp.ncbi.nlm.nih.gov/genomes/all/GCF/001/055/645/GCF_001055645.1_ASM105564v1	ftp://ftp.ncbi.nlm.nih.gov/genomes/all/GCA/001/055/645/GCA_001055645.1_ASM105564v1	University_of_Washington	2015/07/10_00:00	2015/07/10_00:00	2015/07/10_00:00	2019/01/07_00:00	SAMN03197373	assembly	Enterobacter_spp	E_bugandensis	#N/A	660		NA	absent	absent	-	present
SAMN03197824	missing	Homo_sapiens	missing		UW_clinical_laboratory		GCF_001057675.1	ASM105767v1	Contig	NA	624_ECLO	JUZQ01	4751852	183	63316	550	Enterobacter_cloacae_(enterobacteria)	Enterobacter_cloacae	ftp://ftp.ncbi.nlm.nih.gov/genomes/all/GCF/001/057/675/GCF_001057675.1_ASM105767v1	ftp://ftp.ncbi.nlm.nih.gov/genomes/all/GCA/001/057/675/GCA_001057675.1_ASM105767v1	University_of_Washington	2015/07/10_00:00	2015/07/10_00:00	2015/07/10_00:00	2015/07/19_00:00	SAMN03197824	assembly	Enterobacter_spp	Unidentified-2	#N/A	669		IncFIB_IncFII	absent	absent	-	present
SAMN03732728	bodily_fluid	Homo_sapiens			Vance_Fowler		GCF_001022885.1	ASM102288v1	Contig	NA	GN02808	LEDD01	4752278	50	180046	299766	Enterobacter_hormaechei_subsp._steigerwaltii_(enterobacteria)	Enterobacter_hormaechei	ftp://ftp.ncbi.nlm.nih.gov/genomes/all/GCF/001/022/885/GCF_001022885.1_ASM102288v1	ftp://ftp.ncbi.nlm.nih.gov/genomes/all/GCA/001/022/885/GCA_001022885.1_ASM102288v1	JCVI	2015/06/09_00:00	2015/06/09_00:00	2015/06/09_00:00	2016/06/24_00:00	SAMN03732728	assembly	Enterobacter_spp	E_xiangfangensis	1	706		IncFII_IncR	absent	absent	-	present
SAMEA2273241	blood	Homo_sapiens					GCF_900077785.1	11983_7#16	Scaffold	NA	e806	FKGP01	4752787	34	382504	550	Enterobacter_cloacae_(enterobacteria)	Enterobacter_cloacae	ftp://ftp.ncbi.nlm.nih.gov/genomes/all/GCF/900/077/785/GCF_900077785.1_11983_7_16	ftp://ftp.ncbi.nlm.nih.gov/genomes/all/GCA/900/077/785/GCA_900077785.1_11983_7_16	SC	2016/04/13_00:00	2016/05/09_00:00	2016/05/09_00:00	2016/05/14_00:00	SAMEA2273241	assembly	Enterobacter_spp	E_xiangfangensis	1	973		IncFIB	absent	absent	-	present
SAMEA2273441	blood	Homo_sapiens					GCF_900076435.1	12045_5#19	Scaffold	NA	e2129	FKIQ01	4754279	34	231177	550	Enterobacter_cloacae_(enterobacteria)	Enterobacter_cloacae	ftp://ftp.ncbi.nlm.nih.gov/genomes/all/GCF/900/076/435/GCF_900076435.1_12045_5_19	ftp://ftp.ncbi.nlm.nih.gov/genomes/all/GCA/900/076/435/GCA_900076435.1_12045_5_19	SC	2016/04/15_00:00	2016/05/09_00:00	2016/05/09_00:00	2016/05/13_00:00	SAMEA2273441	assembly	Enterobacter_spp	E_xiangfangensis	1	90		NA	absent	absent	-	present
SAMN09845224		Homo_sapiens					GCF_003964815.1	ASM396481v1	Contig	NA	WCHEH090059	RXSC01	4754719	86	231472	158836	Enterobacter_hormaechei_(enterobacteria)	Enterobacter_hormaechei	ftp://ftp.ncbi.nlm.nih.gov/genomes/all/GCF/003/964/815/GCF_003964815.1_ASM396481v1	ftp://ftp.ncbi.nlm.nih.gov/genomes/all/GCA/003/964/815/GCA_003964815.1_ASM396481v1	West_China_Hospital,_Sichuan_University	2018/12/23_00:00	2018/12/23_00:00	2018/12/23_00:00	2018/12/28_00:00	SAMN09845224	assembly	Enterobacter_spp	E_xiangfangensis	3	171		FIA_IncFIA_IncFIB_IncN_IncR_IncX3	absent	absent	blaNDM-5	absent
SAMEA2273230	blood	Homo_sapiens					GCF_900077665.1	11983_7#4	Scaffold	NA	e751	FKGA01	4754886	52	232839	550	Enterobacter_cloacae_(enterobacteria)	Enterobacter_cloacae	ftp://ftp.ncbi.nlm.nih.gov/genomes/all/GCF/900/077/665/GCF_900077665.1_11983_7_4	ftp://ftp.ncbi.nlm.nih.gov/genomes/all/GCA/900/077/665/GCA_900077665.1_11983_7_4	SC	2016/04/13_00:00	2016/05/09_00:00	2016/05/09_00:00	2016/05/14_00:00	SAMEA2273230	assembly	Enterobacter_spp	E_xiangfangensis	4	68		IncR_pENTAS02	absent	absent	-	absent
SAMD00016833							GCF_001312605.1	ASM131260v1	Contig	NA	JCM_6051	BBED01	4754993	248	43556	1298604	Enterobacter_asburiae_JCM_6051_(enterobacteria)	Enterobacter_asburiae	ftp://ftp.ncbi.nlm.nih.gov/genomes/all/GCF/001/312/605/GCF_001312605.1_ASM131260v1	ftp://ftp.ncbi.nlm.nih.gov/genomes/all/GCA/001/312/605/GCA_001312605.1_ASM131260v1	The_University_of_Tokyo	2015/10/02_00:00	2015/10/13_00:00	2015/10/13_00:00	2015/12/11_00:00	SAMD00016833	assembly	Enterobacter_spp	E_asburiae	#N/A	-		IncFIB_IncFII	absent	absent	-	absent
SAMN02138544	urine	missing					GCF_000534735.1	Ente_cloa_complex_MGH_4_V2	Scaffold	NA	MGH_4	JCLT01	4755601	20	355319	1329813	Enterobacter_sp._MGH_4_(enterobacteria)	Enterobacter_hormaechei	ftp://ftp.ncbi.nlm.nih.gov/genomes/all/GCF/000/534/735/GCF_000534735.1_Ente_cloa_complex_MGH_4_V2	ftp://ftp.ncbi.nlm.nih.gov/genomes/all/GCA/000/534/735/GCA_000534735.1_Ente_cloa_complex_MGH_4_V2	Broad_Institute	2014/02/03_00:00	2014/02/03_00:00	2014/02/03_00:00	2014/10/09_00:00	SAMN02138544	assembly	Enterobacter_spp	E_xiangfangensis	2	729		FIA_IncFIA_IncR	absent	absent	-	absent
SAMN07448203	urine	Homo_sapiens	Urinary_tract_infection		Koh_Tse_Hsien,_Singapore_General_Hospital		GCF_002278265.1	ASM227826v1	Scaffold	NA	DU20756	NPNP01	4756111	62	174181	550	Enterobacter_cloacae_(enterobacteria)	Enterobacter_cloacae	ftp://ftp.ncbi.nlm.nih.gov/genomes/all/GCF/002/278/265/GCF_002278265.1_ASM227826v1	ftp://ftp.ncbi.nlm.nih.gov/genomes/all/GCA/002/278/265/GCA_002278265.1_ASM227826v1	National_University_of_Singapore_and_Genome_Institute_of_Singapore	2017/08/30_00:00	2017/08/30_00:00	2017/08/30_00:00	2017/09/01_00:00	SAMN07448203	assembly	Enterobacter_spp	E_cloacae	#N/A	820		NA	absent	absent	blaIMI-1	present
SAMN11366430	urine	Homo_sapiens	not_collected		Amreeta_Dhanoa		GCF_004794965.1	ASM479496v1	Contig	NA	MGF017	SSCT01	4756141	69	203614	158836	Enterobacter_hormaechei_(enterobacteria)	Enterobacter_hormaechei	ftp://ftp.ncbi.nlm.nih.gov/genomes/all/GCF/004/794/965/GCF_004794965.1_ASM479496v1	ftp://ftp.ncbi.nlm.nih.gov/genomes/all/GCA/004/794/965/GCA_004794965.1_ASM479496v1	Deakin_University	2019/04/15_00:00	2019/04/15_00:00	2019/04/15_00:00	2019/04/20_00:00	SAMN11366430	assembly	Enterobacter_spp	E_xiangfangensis	3	-		IncFIB_IncFII	absent	absent	blaNDM-1	absent
SAMN02356616	tissue	Homo_sapiens					GCF_000534175.1	Ente_cloa_UCI_36_V1	Scaffold	NA	UCI_36	JCKR01	4756229	17	590124	158836	Enterobacter_hormaechei_(enterobacteria)	Enterobacter_hormaechei	ftp://ftp.ncbi.nlm.nih.gov/genomes/all/GCF/000/534/175/GCF_000534175.1_Ente_cloa_UCI_36_V1	ftp://ftp.ncbi.nlm.nih.gov/genomes/all/GCA/000/534/175/GCA_000534175.1_Ente_cloa_UCI_36_V1	Broad_Institute	2014/02/03_00:00	2014/02/03_00:00	2014/02/03_00:00	2018/11/14_00:00	SAMN02356616	assembly	Enterobacter_spp	E_xiangfangensis	3	127		FIA_IncFIA	absent	absent	-	absent
SAMN07832852	sputum	Homo_sapiens	Respiratory_disease		Peihan_Li		GCF_002778385.1	ASM277838v1	Contig	NA	EcHK001	PEIL01	4756277	52	275538	158836	Enterobacter_hormaechei_(enterobacteria)	Enterobacter_hormaechei	ftp://ftp.ncbi.nlm.nih.gov/genomes/all/GCF/002/778/385/GCF_002778385.1_ASM277838v1	ftp://ftp.ncbi.nlm.nih.gov/genomes/all/GCA/002/778/385/GCA_002778385.1_ASM277838v1	Institute_of_Disease_Prevention_and_Control_of_Chinese_People&apos;s_Liberation_Army	2017/11/16_00:00	2017/11/16_00:00	2017/11/16_00:00	2019/01/07_00:00	SAMN07832852	assembly	Enterobacter_spp	E_xiangfangensis	1	1000		IncFIB_IncFII_IncX3	absent	absent	blaNDM-1	present
SAMN07448207	rectal	Homo_sapiens	None_(screening_isolate)		Koh_Tse_Hsien,_Singapore_General_Hospital		GCF_002266385.1	ASM226638v1	Scaffold	NA	DS31253	NPNL01	4756640	58	174638	550	Enterobacter_cloacae_(enterobacteria)	Enterobacter_cloacae	ftp://ftp.ncbi.nlm.nih.gov/genomes/all/GCF/002/266/385/GCF_002266385.1_ASM226638v1	ftp://ftp.ncbi.nlm.nih.gov/genomes/all/GCA/002/266/385/GCA_002266385.1_ASM226638v1	National_University_of_Singapore_and_Genome_Institute_of_Singapore	2017/08/22_00:00	2017/08/22_00:00	2017/08/22_00:00	2017/08/24_00:00	SAMN07448207	assembly	Enterobacter_spp	E_cloacae	#N/A	820		NA	absent	absent	blaIMI-1	present
SAMN09845206		Homo_sapiens					GCF_003965205.1	ASM396520v1	Contig	NA	WCHEB090029	RXRK01	4757330	46	208431	881260	Enterobacter_bugandensis_(enterobacteria)	Enterobacter_bugandensis	ftp://ftp.ncbi.nlm.nih.gov/genomes/all/GCF/003/965/205/GCF_003965205.1_ASM396520v1	ftp://ftp.ncbi.nlm.nih.gov/genomes/all/GCA/003/965/205/GCA_003965205.1_ASM396520v1	West_China_Hospital,_Sichuan_University	2018/12/23_00:00	2018/12/23_00:00	2018/12/23_00:00	2018/12/28_00:00	SAMN09845206	assembly	Enterobacter_spp	E_bugandensis	#N/A	718		IncX3	absent	absent	blaNDM-5	present
SAMN04578338	Unknown	Homo_sapiens	Bloodstream_infection		Vance_Fowler		GCF_001631695.1	ASM163169v1	Contig	NA	GN04609	LVTP01	4757728	147	54796	1812935	Enterobacter_roggenkampii_(enterobacteria)	Enterobacter_roggenkampii	ftp://ftp.ncbi.nlm.nih.gov/genomes/all/GCF/001/631/695/GCF_001631695.1_ASM163169v1	ftp://ftp.ncbi.nlm.nih.gov/genomes/all/GCA/001/631/695/GCA_001631695.1_ASM163169v1	JCVI	2016/04/25_00:00	2016/04/25_00:00	2016/04/25_00:00	2016/04/26_00:00	SAMN04578338	assembly	Enterobacter_spp	E_roggenkampii	#N/A	-		NA	absent	absent	-	present
SAMN06456999	plastic						GCA_002321755.1	ASM232175v1	Scaffold	UBA1636		DCLY01	4757875	100	103693	550	Enterobacter_cloacae_(enterobacteria)	Enterobacter_cloacae	NA	ftp://ftp.ncbi.nlm.nih.gov/genomes/all/GCA/002/321/755/GCA_002321755.1_ASM232175v1	University_of_Queensland	2017/09/21_00:00	2017/09/21_00:00	2017/09/21_00:00	2017/09/21_00:00	SAMN06456999	assembly	Enterobacter_spp	E_cloacae	#N/A	-		NA	absent	absent	-	present
SAMN02470114	industrial_waste_(mud)						GCF_000390425.1	ASM39042v1	Contig	NA	MR2	ARYB01	4758062	230	36082	1312879	Enterobacter_cloacae_MR2_(enterobacteria)	Enterobacter_cloacae	ftp://ftp.ncbi.nlm.nih.gov/genomes/all/GCF/000/390/425/GCF_000390425.1_ASM39042v1	ftp://ftp.ncbi.nlm.nih.gov/genomes/all/GCA/000/390/425/GCA_000390425.1_ASM39042v1	Department_of_Biotechnology,_Junagadh_Agricultural_University,_Junagadh,_Gujarat,_INDIA	2013/05/13_00:00	2013/05/13_00:00	2013/05/13_00:00	2019/01/25_00:00	SAMN02470114	assembly	Enterobacter_spp	E_cloacae	#N/A	-		NA	absent	absent	-	present
SAMN06887690	Baby_spinach_leaves						GCF_002193115.1	ASM219311v1	Contig	NA	MN73R	NFUM01	4759704	24	582906	208224	Enterobacter_kobei_(enterobacteria)	Enterobacter_kobei	ftp://ftp.ncbi.nlm.nih.gov/genomes/all/GCF/002/193/115/GCF_002193115.1_ASM219311v1	ftp://ftp.ncbi.nlm.nih.gov/genomes/all/GCA/002/193/115/GCA_002193115.1_ASM219311v1	Macquarie_University	2017/06/14_00:00	2017/06/14_00:00	2017/06/14_00:00	2019/01/07_00:00	SAMN06887690	assembly	Enterobacter_spp	E_kobei	#N/A	-		NA	absent	absent	-	present
SAMEA2273139	blood	Homo_sapiens					GCF_900076805.1	12045_4#18	Scaffold	NA	e282	FKBW01	4761284	45	254799	550	Enterobacter_cloacae_(enterobacteria)	Enterobacter_cloacae	ftp://ftp.ncbi.nlm.nih.gov/genomes/all/GCF/900/076/805/GCF_900076805.1_12045_4_18	ftp://ftp.ncbi.nlm.nih.gov/genomes/all/GCA/900/076/805/GCA_900076805.1_12045_4_18	SC	2016/04/13_00:00	2016/05/09_00:00	2016/05/09_00:00	2016/05/14_00:00	SAMEA2273139	assembly	Enterobacter_spp	E_xiangfangensis	4	68		IncR_pENTAS02	absent	absent	-	absent
SAMN06457004	wood						GCA_002478425.1	ASM247842v1	Scaffold	UBA7499		DLNX01	4761639	32	296777	539813	Enterobacter_mori_(enterobacteria)	Enterobacter_mori	NA	ftp://ftp.ncbi.nlm.nih.gov/genomes/all/GCA/002/478/425/GCA_002478425.1_ASM247842v1	University_of_Queensland	2017/10/06_00:00	2017/10/06_00:00	2017/10/06_00:00	2017/10/06_00:00	SAMN06457004	assembly	Enterobacter_spp	E_mori	#N/A	-		NA	absent	absent	-	present
SAMEA2273192	blood	Homo_sapiens					GCF_900077375.1	12045_4#64	Scaffold	NA	e572	FKFA01	4762125	51	179492	550	Enterobacter_cloacae_(enterobacteria)	Enterobacter_cloacae	ftp://ftp.ncbi.nlm.nih.gov/genomes/all/GCF/900/077/375/GCF_900077375.1_12045_4_64	ftp://ftp.ncbi.nlm.nih.gov/genomes/all/GCA/900/077/375/GCA_900077375.1_12045_4_64	SC	2016/04/13_00:00	2016/05/09_00:00	2016/05/09_00:00	2016/05/13_00:00	SAMEA2273192	assembly	Enterobacter_spp	E_xiangfangensis	1	50		NA	absent	absent	-	present
SAMN03197543	missing	Homo_sapiens	missing		UW_clinical_laboratory		GCF_001076375.1	ASM107637v1	Scaffold	NA	353_ECLO	JVKL01	4762741	86	124918	299766	Enterobacter_hormaechei_subsp._steigerwaltii_(enterobacteria)	Enterobacter_hormaechei	ftp://ftp.ncbi.nlm.nih.gov/genomes/all/GCF/001/076/375/GCF_001076375.1_ASM107637v1	ftp://ftp.ncbi.nlm.nih.gov/genomes/all/GCA/001/076/375/GCA_001076375.1_ASM107637v1	University_of_Washington	2015/07/10_00:00	2015/07/10_00:00	2015/07/10_00:00	2016/07/20_00:00	SAMN03197543	assembly	Enterobacter_spp	E_xiangfangensis	1	124		IncFIB	absent	absent	-	present
SAMN03099801	glyphosate_polluted_soil	Oryza_sativa					GCF_000801755.2	ASM80175v2	Complete_Genome	NA	E20	NA	4763114	1	4763114	1560339	Enterobacter_sp._E20_(enterobacteria)	Enterobacter_sp._E20	ftp://ftp.ncbi.nlm.nih.gov/genomes/all/GCF/000/801/755/GCF_000801755.2_ASM80175v2	ftp://ftp.ncbi.nlm.nih.gov/genomes/all/GCA/000/801/755/GCA_000801755.2_ASM80175v2	Chinese_Academy_of_Agricultural_Sciences	2015/10/26_00:00	2015/10/29_00:00	2015/10/29_00:00	2015/10/30_00:00	SAMN03099801	assembly	Enterobacter_spp	E_asburiae	#N/A	709		NA	present	absent	-	present
SAMN04407765	Unknown	Homo_sapiens	Bloodstream_infection		Vance_Fowler		GCF_001518525.1	ASM151852v1	Contig	NA	GN02618	LRBY01	4763783	92	73828	208224	Enterobacter_kobei_(enterobacteria)	Enterobacter_kobei	ftp://ftp.ncbi.nlm.nih.gov/genomes/all/GCF/001/518/525/GCF_001518525.1_ASM151852v1	ftp://ftp.ncbi.nlm.nih.gov/genomes/all/GCA/001/518/525/GCA_001518525.1_ASM151852v1	JCVI	2016/01/19_00:00	2016/01/19_00:00	2016/01/19_00:00	2016/06/24_00:00	SAMN04407765	assembly	Enterobacter_spp	E_kobei	#N/A	3		NA	absent	absent	-	present
SAMN09845209		Homo_sapiens					GCF_003986875.1	ASM398687v1	Contig	NA	WCHEn090032	RXRN01	4764312	76	161169	2497435	Enterobacter_sp._WCHEn090032_(enterobacteria)	Enterobacter_sp._WCHEn090032	ftp://ftp.ncbi.nlm.nih.gov/genomes/all/GCF/003/986/875/GCF_003986875.1_ASM398687v1	ftp://ftp.ncbi.nlm.nih.gov/genomes/all/GCA/003/986/875/GCA_003986875.1_ASM398687v1	West_China_Hospital,_Sichuan_University	2018/12/23_00:00	2018/12/31_00:00	2018/12/31_00:00	2019/01/02_00:00	SAMN09845209	assembly	Enterobacter_spp	E_sichuanensis	#N/A	-		NA	absent	absent	-	present
SAMEA2273399	blood	Homo_sapiens					GCF_900076045.1	11983_6#77	Scaffold	NA	e1693	FKAE01	4764339	44	181204	550	Enterobacter_cloacae_(enterobacteria)	Enterobacter_cloacae	ftp://ftp.ncbi.nlm.nih.gov/genomes/all/GCF/900/076/045/GCF_900076045.1_11983_6_77	ftp://ftp.ncbi.nlm.nih.gov/genomes/all/GCA/900/076/045/GCA_900076045.1_11983_6_77	SC	2016/04/04_00:00	2016/04/06_00:00	2016/04/06_00:00	2016/04/18_00:00	SAMEA2273399	assembly	Enterobacter_spp	E_xiangfangensis	1	346		NA	absent	absent	-	present
SAMEA2273356	blood	Homo_sapiens					GCF_900075725.1	11983_6#36	Scaffold	NA	e1454	FJYY01	4765306	35	363628	550	Enterobacter_cloacae_(enterobacteria)	Enterobacter_cloacae	ftp://ftp.ncbi.nlm.nih.gov/genomes/all/GCF/900/075/725/GCF_900075725.1_11983_6_36	ftp://ftp.ncbi.nlm.nih.gov/genomes/all/GCA/900/075/725/GCA_900075725.1_11983_6_36	SC	2016/04/04_00:00	2016/04/06_00:00	2016/04/06_00:00	2016/04/08_00:00	SAMEA2273356	assembly	Enterobacter_spp	E_xiangfangensis	1	793		IncR	absent	absent	-	present
SAMN10252912	Vermicompost				Nudiba-UENF		GCF_004801095.1	ASM480109v1	Contig	NA	UENF-21GII	RDOI01	4765459	17	1030401	881260	Enterobacter_bugandensis_(enterobacteria)	Enterobacter_bugandensis	ftp://ftp.ncbi.nlm.nih.gov/genomes/all/GCF/004/801/095/GCF_004801095.1_ASM480109v1	ftp://ftp.ncbi.nlm.nih.gov/genomes/all/GCA/004/801/095/GCA_004801095.1_ASM480109v1	UENF	2019/04/18_00:00	2019/04/18_00:00	2019/04/18_00:00	2019/04/24_00:00	SAMN10252912	assembly	Enterobacter_spp	E_bugandensis	#N/A	-		NA	absent	absent	-	present
SAMEA104567607	faecal	Homo_sapiens					GCA_902161075.1	25426_7#238	Scaffold	NA	4928STDY7071500	CABGQJ01	4765955	39	400107	550	Enterobacter_cloacae_(enterobacteria)	Enterobacter_cloacae	NA	ftp://ftp.ncbi.nlm.nih.gov/genomes/all/GCA/902/161/075/GCA_902161075.1_25426_7_238	SC	2019/07/08_00:00	2019/07/12_00:00	2019/07/12_00:00	2019/07/12_00:00	SAMEA104567607	assembly	Enterobacter_spp	E_xiangfangensis	2	158		FIA_IncFIA	absent	absent	-	absent
SAMN03861996	rectal_swab_from_female	Homo_sapiens					GCF_001263115.1	EntNMC_A5miseq	Contig	NA	AOUC-8/14	LGIV01	4766022	15	695071	299767	Enterobacter_ludwigii_(enterobacteria)	Enterobacter_ludwigii	ftp://ftp.ncbi.nlm.nih.gov/genomes/all/GCF/001/263/115/GCF_001263115.1_EntNMC_A5miseq	ftp://ftp.ncbi.nlm.nih.gov/genomes/all/GCA/001/263/115/GCA_001263115.1_EntNMC_A5miseq	University_of_Siena	2015/08/07_00:00	2015/08/07_00:00	2015/08/07_00:00	2015/08/12_00:00	SAMN03861996	assembly	Enterobacter_spp	E_ludwigii	#N/A	409		NA	absent	absent	blaNMC-A	present
SAMEA2273140	blood	Homo_sapiens					GCF_900076815.1	12045_4#19	Scaffold	NA	e283	FKBX01	4767203	57	252397	550	Enterobacter_cloacae_(enterobacteria)	Enterobacter_cloacae	ftp://ftp.ncbi.nlm.nih.gov/genomes/all/GCF/900/076/815/GCF_900076815.1_12045_4_19	ftp://ftp.ncbi.nlm.nih.gov/genomes/all/GCA/900/076/815/GCA_900076815.1_12045_4_19	SC	2016/04/13_00:00	2016/05/09_00:00	2016/05/09_00:00	2016/05/14_00:00	SAMEA2273140	assembly	Enterobacter_spp	E_xiangfangensis	3	264		IncFIB_IncFII	absent	absent	-	absent
SAMN07448208	rectal	Homo_sapiens	None_(screening_isolate)		Koh_Tse_Hsien,_Singapore_General_Hospital		GCF_002278165.1	ASM227816v1	Scaffold	NA	DS31788	NPNK01	4767242	53	190606	550	Enterobacter_cloacae_(enterobacteria)	Enterobacter_cloacae	ftp://ftp.ncbi.nlm.nih.gov/genomes/all/GCF/002/278/165/GCF_002278165.1_ASM227816v1	ftp://ftp.ncbi.nlm.nih.gov/genomes/all/GCA/002/278/165/GCA_002278165.1_ASM227816v1	National_University_of_Singapore_and_Genome_Institute_of_Singapore	2017/08/30_00:00	2017/08/30_00:00	2017/08/30_00:00	2017/09/01_00:00	SAMN07448208	assembly	Enterobacter_spp	E_cloacae	#N/A	-		NA	absent	absent	blaIMI-1	present
SAMD00166968							GCF_007035805.1	ASM703580v1	Complete_Genome	NA	17Nkhm-UP2	NA	4768325	2	4643312	61645	Enterobacter_asburiae_(enterobacteria)	Enterobacter_asburiae	ftp://ftp.ncbi.nlm.nih.gov/genomes/all/GCF/007/035/805/GCF_007035805.1_ASM703580v1	ftp://ftp.ncbi.nlm.nih.gov/genomes/all/GCA/007/035/805/GCA_007035805.1_ASM703580v1	Laboratory_of_Bacterial_Genomics,_Pathogen_Genomics_Center,_National_Institute_of_Infectious_Diseases	2019/05/14_00:00	2019/07/16_00:00	2019/07/16_00:00	2019/07/30_00:00	SAMD00166968	assembly	Enterobacter_spp	E_asburiae	#N/A	657		IncFIB_IncFII_IncR	absent	absent	blaFRI-4,blaFRI-4	present
SAMEA2273272	blood	Homo_sapiens					GCF_900078115.1	11983_7#48	Scaffold	NA	e965	FKHX01	4768349	72	197609	550	Enterobacter_cloacae_(enterobacteria)	Enterobacter_cloacae	ftp://ftp.ncbi.nlm.nih.gov/genomes/all/GCF/900/078/115/GCF_900078115.1_11983_7_48	ftp://ftp.ncbi.nlm.nih.gov/genomes/all/GCA/900/078/115/GCA_900078115.1_11983_7_48	SC	2016/04/13_00:00	2016/05/09_00:00	2016/05/09_00:00	2016/05/14_00:00	SAMEA2273272	assembly	Enterobacter_spp	E_xiangfangensis	4	108		IncFIB_IncFII_IncR	absent	absent	-	absent
SAMN03196963	missing	Homo_sapiens	missing		UW_clinical_laboratory		GCF_001052605.1	ASM105260v1	Scaffold	NA	1001_ECLO	JWGT01	4768492	261	54922	1812935	Enterobacter_roggenkampii_(enterobacteria)	Enterobacter_roggenkampii	ftp://ftp.ncbi.nlm.nih.gov/genomes/all/GCF/001/052/605/GCF_001052605.1_ASM105260v1	ftp://ftp.ncbi.nlm.nih.gov/genomes/all/GCA/001/052/605/GCA_001052605.1_ASM105260v1	University_of_Washington	2015/07/10_00:00	2015/07/10_00:00	2015/07/10_00:00	2016/07/19_00:00	SAMN03196963	assembly	Enterobacter_spp	E_roggenkampii	#N/A	655		IncFIB	absent	present	-	present
SAMN02952977							GCF_000686165.1	ASM68616v1	Scaffold	NA	JD8715	JDWG01	4769233	62	220249	1399775	Enterobacter_cloacae_JD8715_(enterobacteria)	Enterobacter_cloacae	ftp://ftp.ncbi.nlm.nih.gov/genomes/all/GCF/000/686/165/GCF_000686165.1_ASM68616v1	ftp://ftp.ncbi.nlm.nih.gov/genomes/all/GCA/000/686/165/GCA_000686165.1_ASM68616v1	DOE_Joint_Genome_Institute	2014/05/08_00:00	2014/05/08_00:00	2014/05/08_00:00	2014/10/09_00:00	SAMN02952977	assembly	Enterobacter_spp	Unidentified-2	#N/A	719		NA	absent	absent	-	present
SAMEA2273376	blood	Homo_sapiens					GCF_900075845.1	11983_6#56	Scaffold	NA	e1547	FJZK01	4769308	49	190099	550	Enterobacter_cloacae_(enterobacteria)	Enterobacter_cloacae	ftp://ftp.ncbi.nlm.nih.gov/genomes/all/GCF/900/075/845/GCF_900075845.1_11983_6_56	ftp://ftp.ncbi.nlm.nih.gov/genomes/all/GCA/900/075/845/GCA_900075845.1_11983_6_56	SC	2016/04/04_00:00	2016/04/06_00:00	2016/04/06_00:00	2016/04/13_00:00	SAMEA2273376	assembly	Enterobacter_spp	E_xiangfangensis	1	116		IncFIB_IncFII	absent	absent	-	present
SAMN03197831	missing	Homo_sapiens	missing		UW_clinical_laboratory		GCF_001077015.1	ASM107701v1	Scaffold	NA	630_ECLO	JUZJ01	4769465	141	80353	550	Enterobacter_cloacae_(enterobacteria)	Enterobacter_cloacae	ftp://ftp.ncbi.nlm.nih.gov/genomes/all/GCF/001/077/015/GCF_001077015.1_ASM107701v1	ftp://ftp.ncbi.nlm.nih.gov/genomes/all/GCA/001/077/015/GCA_001077015.1_ASM107701v1	University_of_Washington	2015/07/10_00:00	2015/07/10_00:00	2015/07/10_00:00	2015/07/19_00:00	SAMN03197831	assembly	Enterobacter_spp	Unidentified-2	#N/A	669		IncFIB_IncFII	absent	absent	-	present
SAMEA2273351	blood	Homo_sapiens					GCF_900075695.1	11983_6#30	Scaffold	NA	e1422	FJYV01	4769660	45	314537	550	Enterobacter_cloacae_(enterobacteria)	Enterobacter_cloacae	ftp://ftp.ncbi.nlm.nih.gov/genomes/all/GCF/900/075/695/GCF_900075695.1_11983_6_30	ftp://ftp.ncbi.nlm.nih.gov/genomes/all/GCA/900/075/695/GCA_900075695.1_11983_6_30	SC	2016/04/04_00:00	2016/04/06_00:00	2016/04/06_00:00	2016/04/12_00:00	SAMEA2273351	assembly	Enterobacter_spp	E_xiangfangensis	3	544		IncFIB_IncR	absent	absent	-	absent
SAMN09845198		Homo_sapiens					GCF_003965295.1	ASM396529v1	Contig	NA	WCHEH090020	RXRD01	4770450	63	202892	158836	Enterobacter_hormaechei_(enterobacteria)	Enterobacter_hormaechei	ftp://ftp.ncbi.nlm.nih.gov/genomes/all/GCF/003/965/295/GCF_003965295.1_ASM396529v1	ftp://ftp.ncbi.nlm.nih.gov/genomes/all/GCA/003/965/295/GCA_003965295.1_ASM396529v1	West_China_Hospital,_Sichuan_University	2018/12/23_00:00	2018/12/23_00:00	2018/12/23_00:00	2018/12/28_00:00	SAMN09845198	assembly	Enterobacter_spp	E_xiangfangensis	1	-		IncFIB_IncFII	absent	absent	-	present
SAMN09435830	urine_sample	Homo_sapiens	Not_available		French_National_Reference_Center_for_Antibiotic_Resistance		GCF_003289185.1	ASM328918v1	Scaffold	NA	145F2	QMCM01	4770603	181	64977	208224	Enterobacter_kobei_(enterobacteria)	Enterobacter_kobei	ftp://ftp.ncbi.nlm.nih.gov/genomes/all/GCF/003/289/185/GCF_003289185.1_ASM328918v1	ftp://ftp.ncbi.nlm.nih.gov/genomes/all/GCA/003/289/185/GCA_003289185.1_ASM328918v1	CHU_de_Bicetre	2018/07/06_00:00	2018/07/06_00:00	2018/07/06_00:00	2018/07/11_00:00	SAMN09435830	assembly	Enterobacter_spp	E_kobei	#N/A	125		NA	absent	absent	-	present
SAMD00166948		Homo_sapiens					GCF_007035645.1	ASM703564v1	Complete_Genome	NA	1808-013	NA	4770723	2	4639748	61645	Enterobacter_asburiae_(enterobacteria)	Enterobacter_asburiae	ftp://ftp.ncbi.nlm.nih.gov/genomes/all/GCF/007/035/645/GCF_007035645.1_ASM703564v1	ftp://ftp.ncbi.nlm.nih.gov/genomes/all/GCA/007/035/645/GCA_007035645.1_ASM703564v1	Laboratory_of_Bacterial_Genomics,_Pathogen_Genomics_Center,_National_Institute_of_Infectious_Diseases	2019/05/14_00:00	2019/07/16_00:00	2019/07/16_00:00	2019/07/30_00:00	SAMD00166948	assembly	Enterobacter_spp	E_asburiae	#N/A	-		IncFIB_IncFII_IncR	absent	absent	blaFRI-9	present
SAMEA2273418	blood	Homo_sapiens					GCF_900076225.1	11983_6#94	Scaffold	NA	e1831	FKAW01	4771249	53	194991	550	Enterobacter_cloacae_(enterobacteria)	Enterobacter_cloacae	ftp://ftp.ncbi.nlm.nih.gov/genomes/all/GCF/900/076/225/GCF_900076225.1_11983_6_94	ftp://ftp.ncbi.nlm.nih.gov/genomes/all/GCA/900/076/225/GCA_900076225.1_11983_6_94	SC	2016/04/05_00:00	2016/04/06_00:00	2016/04/06_00:00	2016/04/12_00:00	SAMEA2273418	assembly	Enterobacter_spp	E_xiangfangensis	1	50		NA	absent	absent	-	present
SAMN03732731	bodily_fluid	Homo_sapiens			Vance_Fowler		GCF_001022955.1	ASM102295v1	Contig	NA	GN03140	LEDA01	4771797	67	197081	61645	Enterobacter_asburiae_(enterobacteria)	Enterobacter_asburiae	ftp://ftp.ncbi.nlm.nih.gov/genomes/all/GCF/001/022/955/GCF_001022955.1_ASM102295v1	ftp://ftp.ncbi.nlm.nih.gov/genomes/all/GCA/001/022/955/GCA_001022955.1_ASM102295v1	JCVI	2015/06/09_00:00	2015/06/09_00:00	2015/06/09_00:00	2015/06/18_00:00	SAMN03732731	assembly	Enterobacter_spp	E_asburiae	#N/A	252		IncFIB_IncFII_IncR	absent	absent	-	present
SAMN03196962	missing	Homo_sapiens	missing		UW_clinical_laboratory		GCF_001052055.1	ASM105205v1	Scaffold	NA	1000_ECLO	JWGU01	4772134	267	54937	1812935	Enterobacter_roggenkampii_(enterobacteria)	Enterobacter_roggenkampii	ftp://ftp.ncbi.nlm.nih.gov/genomes/all/GCF/001/052/055/GCF_001052055.1_ASM105205v1	ftp://ftp.ncbi.nlm.nih.gov/genomes/all/GCA/001/052/055/GCA_001052055.1_ASM105205v1	University_of_Washington	2015/07/10_00:00	2015/07/10_00:00	2015/07/10_00:00	2016/07/19_00:00	SAMN03196962	assembly	Enterobacter_spp	E_roggenkampii	#N/A	655		IncFIB	absent	present	-	present
SAMN02952978							GCF_000686185.1	ASM68618v1	Scaffold	NA	JD6301	JDWH01	4772910	55	232688	1399774	Enterobacter_cloacae_JD6301_(enterobacteria)	Enterobacter_cloacae	ftp://ftp.ncbi.nlm.nih.gov/genomes/all/GCF/000/686/185/GCF_000686185.1_ASM68618v1	ftp://ftp.ncbi.nlm.nih.gov/genomes/all/GCA/000/686/185/GCA_000686185.1_ASM68618v1	DOE_Joint_Genome_Institute	2014/05/08_00:00	2014/05/08_00:00	2014/05/08_00:00	2014/07/11_00:00	SAMN02952978	assembly	Enterobacter_spp	Unidentified-2	#N/A	719		NA	absent	absent	-	present
SAMEA5852024	human_gut						GCF_902387985.1	UHGG_MGYG-HGUT-02519	Scaffold	MGYG-HGUT-02519		CABMNW01	4773474	160	80960	61645	Enterobacter_asburiae_(enterobacteria)	Enterobacter_asburiae	NA	ftp://ftp.ncbi.nlm.nih.gov/genomes/all/GCA/902/387/985/GCA_902387985.1_UHGG_MGYG-HGUT-02519	EMG	2019/08/16_00:00	2019/08/17_00:00	2019/08/17_00:00	2019/08/22_00:00	SAMEA5852024	assembly	Enterobacter_spp	E_asburiae	#N/A	25		IncFIB_IncFII	absent	absent	-	present
SAMN09435814	human_gut	Homo_sapiens	Not_available		French_National_Reference_Center_for_Antibiotic_Resistance		GCF_003289415.1	ASM328941v1	Scaffold	NA	103D9	QMDC01	4773474	160	80960	61645	Enterobacter_asburiae_(enterobacteria)	Enterobacter_asburiae	ftp://ftp.ncbi.nlm.nih.gov/genomes/all/GCF/003/289/415/GCF_003289415.1_ASM328941v1	ftp://ftp.ncbi.nlm.nih.gov/genomes/all/GCA/003/289/415/GCA_003289415.1_ASM328941v1	CHU_de_Bicetre	2018/07/06_00:00	2018/07/06_00:00	2018/07/06_00:00	2018/07/13_00:00	SAMN09435814	assembly	Enterobacter_spp	E_asburiae	#N/A	25		IncFIB_IncFII	absent	absent	-	present
SAMN04487932							GCF_900177445.1	IMG-taxon_2608642260_annotated_assembly	Chromosome	NA	DG6	NA	4773509	1	4773409	550	Enterobacter_cloacae_(enterobacteria)	Enterobacter_cloacae	ftp://ftp.ncbi.nlm.nih.gov/genomes/all/GCF/900/177/445/GCF_900177445.1_IMG-taxon_2608642260_annotated_assembly	ftp://ftp.ncbi.nlm.nih.gov/genomes/all/GCA/900/177/445/GCA_900177445.1_IMG-taxon_2608642260_annotated_assembly	DOE_-_JOINT_GENOME_INSTITUTE	2017/04/19_00:00	2017/04/20_00:00	2017/04/20_00:00	2017/04/22_00:00	SAMN04487932	assembly	Enterobacter_spp	E_xiangfangensis	1	134		NA	absent	absent	-	present
SAMN02356604	urine	Homo_sapiens					GCF_000534275.1	Ente_cloa_UCI_24_V1	Scaffold	NA	UCI_24	JCKW01	4773801	7	3280190	208224	Enterobacter_kobei_(enterobacteria)	Enterobacter_kobei	ftp://ftp.ncbi.nlm.nih.gov/genomes/all/GCF/000/534/275/GCF_000534275.1_Ente_cloa_UCI_24_V1	ftp://ftp.ncbi.nlm.nih.gov/genomes/all/GCA/000/534/275/GCA_000534275.1_Ente_cloa_UCI_24_V1	Broad_Institute	2014/02/03_00:00	2014/02/03_00:00	2014/02/03_00:00	2018/11/14_00:00	SAMN02356604	assembly	Enterobacter_spp	E_kobei	#N/A	741		NA	absent	absent	-	present
SAMN04572685	Unknown	Homo_sapiens	Bloodstream_infection		Vance_Fowler		GCF_001631405.1	ASM163140v1	Contig	NA	GN05631	LVUI01	4773841	185	46847	299766	Enterobacter_hormaechei_subsp._steigerwaltii_(enterobacteria)	Enterobacter_hormaechei	ftp://ftp.ncbi.nlm.nih.gov/genomes/all/GCF/001/631/405/GCF_001631405.1_ASM163140v1	ftp://ftp.ncbi.nlm.nih.gov/genomes/all/GCA/001/631/405/GCA_001631405.1_ASM163140v1	JCVI	2016/04/25_00:00	2016/04/25_00:00	2016/04/25_00:00	2016/04/26_00:00	SAMN04572685	assembly	Enterobacter_spp	E_xiangfangensis	1	62		NA	absent	absent	-	present
SAMEA2273134	blood	Homo_sapiens					GCF_900076635.1	12045_4#14	Scaffold	NA	e248	FKCV01	4774122	42	203551	550	Enterobacter_cloacae_(enterobacteria)	Enterobacter_cloacae	ftp://ftp.ncbi.nlm.nih.gov/genomes/all/GCF/900/076/635/GCF_900076635.1_12045_4_14	ftp://ftp.ncbi.nlm.nih.gov/genomes/all/GCA/900/076/635/GCA_900076635.1_12045_4_14	SC	2016/04/13_00:00	2016/05/09_00:00	2016/05/09_00:00	2016/05/14_00:00	SAMEA2273134	assembly	Enterobacter_spp	E_xiangfangensis	1	90		NA	absent	absent	-	present
SAMD00089462		Homo_sapiens					GCF_002333625.1	ASM233362v1	Scaffold	NA	TUM10668	BEEI01	4775118	156	70921	299766	Enterobacter_hormaechei_subsp._steigerwaltii_(enterobacteria)	Enterobacter_hormaechei	ftp://ftp.ncbi.nlm.nih.gov/genomes/all/GCF/002/333/625/GCF_002333625.1_ASM233362v1	ftp://ftp.ncbi.nlm.nih.gov/genomes/all/GCA/002/333/625/GCA_002333625.1_ASM233362v1	Toho_University	2017/08/28_00:00	2017/09/21_00:00	2017/09/21_00:00	2017/09/23_00:00	SAMD00089462	assembly	Enterobacter_spp	E_xiangfangensis	1	234		IncFIB	absent	absent	blaIMP-1	present
SAMN09845193		Homo_sapiens					GCF_003965335.1	ASM396533v1	Contig	NA	WCHEH090015	RXQY01	4777393	82	169485	158836	Enterobacter_hormaechei_(enterobacteria)	Enterobacter_hormaechei	ftp://ftp.ncbi.nlm.nih.gov/genomes/all/GCF/003/965/335/GCF_003965335.1_ASM396533v1	ftp://ftp.ncbi.nlm.nih.gov/genomes/all/GCA/003/965/335/GCA_003965335.1_ASM396533v1	West_China_Hospital,_Sichuan_University	2018/12/23_00:00	2018/12/23_00:00	2018/12/23_00:00	2018/12/28_00:00	SAMN09845193	assembly	Enterobacter_spp	E_xiangfangensis	1	50		NA	absent	absent	-	present
SAMN05462048	rhizosphere	Carpobrotus_rossii					GCF_001698955.1	ASM169895v1	Contig	NA	NCR3	MCGF01	4779415	23	771694	299767	Enterobacter_ludwigii_(enterobacteria)	Enterobacter_ludwigii	ftp://ftp.ncbi.nlm.nih.gov/genomes/all/GCF/001/698/955/GCF_001698955.1_ASM169895v1	ftp://ftp.ncbi.nlm.nih.gov/genomes/all/GCA/001/698/955/GCA_001698955.1_ASM169895v1	LaTrobe_University	2016/08/05_00:00	2016/08/05_00:00	2016/08/05_00:00	2016/08/21_00:00	SAMN05462048	assembly	Enterobacter_spp	E_ludwigii	#N/A	895		NA	absent	absent	-	present
SAMEA2273425	blood	Homo_sapiens					GCF_900076285.1	12082_4#53	Scaffold	NA	e1942	FKBB01	4779561	104	96425	550	Enterobacter_cloacae_(enterobacteria)	Enterobacter_cloacae	ftp://ftp.ncbi.nlm.nih.gov/genomes/all/GCF/900/076/285/GCF_900076285.1_12082_4_53	ftp://ftp.ncbi.nlm.nih.gov/genomes/all/GCA/900/076/285/GCA_900076285.1_12082_4_53	SC	2016/04/13_00:00	2016/05/09_00:00	2016/05/09_00:00	2016/05/13_00:00	SAMEA2273425	assembly	Enterobacter_spp	E_roggenkampii	#N/A	422		IncFIB_IncFII_IncN_IncR	absent	absent	-	present
SAMN03283648	Unknown	Unknown	Unknown		Barry_Kreiswirth		GCF_000958065.1	ASM95806v1	Contig	NA	44589	JZXS01	4781435	58	306780	299766	Enterobacter_hormaechei_subsp._steigerwaltii_(enterobacteria)	Enterobacter_hormaechei	ftp://ftp.ncbi.nlm.nih.gov/genomes/all/GCF/000/958/065/GCF_000958065.1_ASM95806v1	ftp://ftp.ncbi.nlm.nih.gov/genomes/all/GCA/000/958/065/GCA_000958065.1_ASM95806v1	JCVI	2015/03/19_00:00	2015/03/19_00:00	2015/03/19_00:00	2016/06/23_00:00	SAMN03283648	assembly	Enterobacter_spp	E_xiangfangensis	1	45		IncL/M_IncN	absent	absent	blaKPC-2	present
SAMN05581751	wound	Homo_sapiens	missing		missing		GCF_001729725.1	ASM172972v1	Complete_Genome	NA	DSM_16691	NA	4782480	1	4782480	299766	Enterobacter_hormaechei_subsp._steigerwaltii_(enterobacteria)	Enterobacter_hormaechei	ftp://ftp.ncbi.nlm.nih.gov/genomes/all/GCF/001/729/725/GCF_001729725.1_ASM172972v1	ftp://ftp.ncbi.nlm.nih.gov/genomes/all/GCA/001/729/725/GCA_001729725.1_ASM172972v1	JCVI	2016/09/16_00:00	2016/09/16_00:00	2016/09/16_00:00	2016/09/19_00:00	SAMN05581751	assembly	Enterobacter_spp	E_xiangfangensis	1	906	yes	NA	absent	absent	-	present
SAMN03197387	missing	Homo_sapiens	missing		UW_clinical_laboratory		GCF_001055805.1	ASM105580v1	Scaffold	NA	195_ECLO	JVQL01	4782722	92	125107	881260	Enterobacter_bugandensis_(enterobacteria)	Enterobacter_bugandensis	ftp://ftp.ncbi.nlm.nih.gov/genomes/all/GCF/001/055/805/GCF_001055805.1_ASM105580v1	ftp://ftp.ncbi.nlm.nih.gov/genomes/all/GCA/001/055/805/GCA_001055805.1_ASM105580v1	University_of_Washington	2015/07/10_00:00	2015/07/10_00:00	2015/07/10_00:00	2019/01/07_00:00	SAMN03197387	assembly	Enterobacter_spp	E_bugandensis	#N/A	660		NA	absent	absent	-	present
SAMN03283670	Unknown	Unknown	Unknown		Barry_Kreiswirth		GCF_000957085.1	ASM95708v1	Contig	NA	35673	JZZA01	4782758	71	162368	1296536	Enterobacter_hormaechei_subsp._xiangfangensis_(enterobacteria)	Enterobacter_hormaechei	ftp://ftp.ncbi.nlm.nih.gov/genomes/all/GCF/000/957/085/GCF_000957085.1_ASM95708v1	ftp://ftp.ncbi.nlm.nih.gov/genomes/all/GCA/000/957/085/GCA_000957085.1_ASM95708v1	JCVI	2015/03/19_00:00	2015/03/19_00:00	2015/03/19_00:00	2018/10/10_00:00	SAMN03283670	assembly	Enterobacter_spp	E_xiangfangensis	3	600		IncFIB_IncFII	present	absent	-	absent
SAMN07448205	rectal	Homo_sapiens	None_(screening_isolate)		Koh_Tse_Hsien,_Singapore_General_Hospital		GCF_002278235.1	ASM227823v1	Scaffold	NA	DS17594	NPNN01	4783199	40	295717	550	Enterobacter_cloacae_(enterobacteria)	Enterobacter_cloacae	ftp://ftp.ncbi.nlm.nih.gov/genomes/all/GCF/002/278/235/GCF_002278235.1_ASM227823v1	ftp://ftp.ncbi.nlm.nih.gov/genomes/all/GCA/002/278/235/GCA_002278235.1_ASM227823v1	National_University_of_Singapore_and_Genome_Institute_of_Singapore	2017/08/30_00:00	2017/08/30_00:00	2017/08/30_00:00	2017/09/01_00:00	SAMN07448205	assembly	Enterobacter_spp	E_cloacae	#N/A	412		NA	absent	absent	blaIMI-1	present
SAMN10525000	blood	Homo_sapiens					GCF_003964795.1	ASM396479v1	Contig	NA	WCHEX045001	RXSH01	4783376	83	148821	1296536	Enterobacter_hormaechei_subsp._xiangfangensis_(enterobacteria)	Enterobacter_hormaechei	ftp://ftp.ncbi.nlm.nih.gov/genomes/all/GCF/003/964/795/GCF_003964795.1_ASM396479v1	ftp://ftp.ncbi.nlm.nih.gov/genomes/all/GCA/003/964/795/GCA_003964795.1_ASM396479v1	West_China_Hospital,_Sichuan_University	2018/12/23_00:00	2018/12/23_00:00	2018/12/23_00:00	2018/12/28_00:00	SAMN10525000	assembly	Enterobacter_spp	E_xiangfangensis	3	171		NA	absent	absent	blaNDM-1	absent
SAMN09845216		Homo_sapiens					GCF_003964935.1	ASM396493v1	Contig	NA	WCHEL090041	RXRU01	4783603	38	486168	299767	Enterobacter_ludwigii_(enterobacteria)	Enterobacter_ludwigii	ftp://ftp.ncbi.nlm.nih.gov/genomes/all/GCF/003/964/935/GCF_003964935.1_ASM396493v1	ftp://ftp.ncbi.nlm.nih.gov/genomes/all/GCA/003/964/935/GCA_003964935.1_ASM396493v1	West_China_Hospital,_Sichuan_University	2018/12/23_00:00	2018/12/23_00:00	2018/12/23_00:00	2018/12/28_00:00	SAMN09845216	assembly	Enterobacter_spp	E_ludwigii	#N/A	-		IncFIB_IncFII	absent	absent	-	present
SAMN04407785	Unknown	Homo_sapiens	Bloodstream_infection		Vance_Fowler		GCF_001518225.1	ASM151822v1	Contig	NA	GN04225	LRCO01	4784638	118	104744	301102	Enterobacter_hormaechei_subsp._oharae_(enterobacteria)	Enterobacter_hormaechei	ftp://ftp.ncbi.nlm.nih.gov/genomes/all/GCF/001/518/225/GCF_001518225.1_ASM151822v1	ftp://ftp.ncbi.nlm.nih.gov/genomes/all/GCA/001/518/225/GCA_001518225.1_ASM151822v1	JCVI	2016/01/19_00:00	2016/01/19_00:00	2016/01/19_00:00	2018/10/10_00:00	SAMN04407785	assembly	Enterobacter_spp	E_xiangfangensis	4	108		IncFIB_IncFII_IncR	absent	absent	-	absent
SAMEA2273503	blood	Homo_sapiens					GCF_900075935.1	12082_4#63	Scaffold	NA	e1617	FJZU01	4784689	37	229677	550	Enterobacter_cloacae_(enterobacteria)	Enterobacter_cloacae	ftp://ftp.ncbi.nlm.nih.gov/genomes/all/GCF/900/075/935/GCF_900075935.1_12082_4_63	ftp://ftp.ncbi.nlm.nih.gov/genomes/all/GCA/900/075/935/GCA_900075935.1_12082_4_63	SC	2016/04/04_00:00	2016/04/06_00:00	2016/04/06_00:00	2016/04/18_00:00	SAMEA2273503	assembly	Enterobacter_spp	E_ludwigii	#N/A	781		NA	absent	absent	-	present
SAMN09845210		Homo_sapiens					GCF_003965175.1	ASM396517v1	Contig	NA	WCHEH090033	RXRO01	4785793	116	136691	158836	Enterobacter_hormaechei_(enterobacteria)	Enterobacter_hormaechei	ftp://ftp.ncbi.nlm.nih.gov/genomes/all/GCF/003/965/175/GCF_003965175.1_ASM396517v1	ftp://ftp.ncbi.nlm.nih.gov/genomes/all/GCA/003/965/175/GCA_003965175.1_ASM396517v1	West_China_Hospital,_Sichuan_University	2018/12/23_00:00	2018/12/23_00:00	2018/12/23_00:00	2018/12/28_00:00	SAMN09845210	assembly	Enterobacter_spp	E_xiangfangensis	2	316		IncFIB_IncFII_IncR	absent	absent	-	absent
SAMEA2273191	blood	Homo_sapiens					GCF_900077365.1	12045_4#63	Scaffold	NA	e571	FKEX01	4785938	52	235534	550	Enterobacter_cloacae_(enterobacteria)	Enterobacter_cloacae	ftp://ftp.ncbi.nlm.nih.gov/genomes/all/GCF/900/077/365/GCF_900077365.1_12045_4_63	ftp://ftp.ncbi.nlm.nih.gov/genomes/all/GCA/900/077/365/GCA_900077365.1_12045_4_63	SC	2016/04/13_00:00	2016/05/09_00:00	2016/05/09_00:00	2016/05/14_00:00	SAMEA2273191	assembly	Enterobacter_spp	E_xiangfangensis	3	264		IncFIB_IncFII_IncX3	present	absent	-	absent
SAMEA2273255	blood	Homo_sapiens					GCF_900077925.1	11983_7#29	Scaffold	NA	e864	FKHG01	4786532	36	234939	550	Enterobacter_cloacae_(enterobacteria)	Enterobacter_cloacae	ftp://ftp.ncbi.nlm.nih.gov/genomes/all/GCF/900/077/925/GCF_900077925.1_11983_7_29	ftp://ftp.ncbi.nlm.nih.gov/genomes/all/GCA/900/077/925/GCA_900077925.1_11983_7_29	SC	2016/04/13_00:00	2016/05/09_00:00	2016/05/09_00:00	2016/05/14_00:00	SAMEA2273255	assembly	Enterobacter_spp	E_ludwigii	#N/A	781		NA	absent	absent	-	present
SAMN02138660	missing	missing					GCF_000534355.1	Ente_cloa_complex_BIDMC_30_V1	Scaffold	NA	BIDMC_30	JCLA01	4786729	8	587187	1329842	Enterobacter_sp._BIDMC_30_(enterobacteria)	Enterobacter_sp._BIDMC_30	ftp://ftp.ncbi.nlm.nih.gov/genomes/all/GCF/000/534/355/GCF_000534355.1_Ente_cloa_complex_BIDMC_30_V1	ftp://ftp.ncbi.nlm.nih.gov/genomes/all/GCA/000/534/355/GCA_000534355.1_Ente_cloa_complex_BIDMC_30_V1	Broad_Institute	2014/02/03_00:00	2014/02/03_00:00	2014/02/03_00:00	2014/10/09_00:00	SAMN02138660	assembly	Enterobacter_spp	E_ludwigii	#N/A	675		NA	absent	absent	-	present
SAMN11483246	desert_sand						GCF_005116545.1	ASM511654v1	Contig	NA	MDMC76	SWCU01	4786737	236	150767	158836	Enterobacter_hormaechei_(enterobacteria)	Enterobacter_hormaechei	ftp://ftp.ncbi.nlm.nih.gov/genomes/all/GCF/005/116/545/GCF_005116545.1_ASM511654v1	ftp://ftp.ncbi.nlm.nih.gov/genomes/all/GCA/005/116/545/GCA_005116545.1_ASM511654v1	MedBiotech_laboratory,_faculty_of_medicine_and_pharmacy,_rabat/_Mohamed_V_university_rabat	2019/05/02_00:00	2019/05/02_00:00	2019/05/02_00:00	2019/05/05_00:00	SAMN11483246	assembly	Enterobacter_spp	E_xiangfangensis	3	600		IncFIB_IncFII	present	absent	-	absent
SAMEA2273342	blood	Homo_sapiens					GCF_900075605.1	11983_6#21	Scaffold	NA	e1351	FJYM01	4787274	60	194051	550	Enterobacter_cloacae_(enterobacteria)	Enterobacter_cloacae	ftp://ftp.ncbi.nlm.nih.gov/genomes/all/GCF/900/075/605/GCF_900075605.1_11983_6_21	ftp://ftp.ncbi.nlm.nih.gov/genomes/all/GCA/900/075/605/GCA_900075605.1_11983_6_21	SC	2016/04/05_00:00	2016/04/06_00:00	2016/04/06_00:00	2016/04/12_00:00	SAMEA2273342	assembly	Enterobacter_spp	E_xiangfangensis	4	68		IncR_pENTAS02	absent	absent	-	absent
SAMEA2273300	blood	Homo_sapiens					GCF_900075005.1	11983_7#76	Scaffold	NA	e1109	FJXC01	4787547	57	222339	550	Enterobacter_cloacae_(enterobacteria)	Enterobacter_cloacae	ftp://ftp.ncbi.nlm.nih.gov/genomes/all/GCF/900/075/005/GCF_900075005.1_11983_7_76	ftp://ftp.ncbi.nlm.nih.gov/genomes/all/GCA/900/075/005/GCA_900075005.1_11983_7_76	SC	2016/04/05_00:00	2016/04/06_00:00	2016/04/06_00:00	2016/04/12_00:00	SAMEA2273300	assembly	Enterobacter_spp	E_xiangfangensis	4	68		IncR_pENTAS02	absent	absent	-	absent
SAMN05960961	blood	Homo_sapiens	Sepsis		Stephen_Obaro		GCF_002239955.1	ASM223995v1	Contig	NA	HB_Z_2347	NJCP01	4787968	44	276077	336306	Enterobacter_cloacae_subsp._cloacae_(enterobacteria)	Enterobacter_cloacae	ftp://ftp.ncbi.nlm.nih.gov/genomes/all/GCF/002/239/955/GCF_002239955.1_ASM223995v1	ftp://ftp.ncbi.nlm.nih.gov/genomes/all/GCA/002/239/955/GCA_002239955.1_ASM223995v1	JCVI	2017/08/02_00:00	2017/08/02_00:00	2017/08/02_00:00	2017/08/04_00:00	SAMN05960961	assembly	Enterobacter_spp	E_cloacae	#N/A	-		NA	absent	absent	-	present
SAMN08932715	Missing						GCF_003986735.1	ASM398673v1	Contig	NA	WCHEA045067	RXPV01	4788283	61	254686	61645	Enterobacter_asburiae_(enterobacteria)	Enterobacter_asburiae	ftp://ftp.ncbi.nlm.nih.gov/genomes/all/GCF/003/986/735/GCF_003986735.1_ASM398673v1	ftp://ftp.ncbi.nlm.nih.gov/genomes/all/GCA/003/986/735/GCA_003986735.1_ASM398673v1	West_China_Hospital,_Sichuan_University	2018/12/23_00:00	2018/12/31_00:00	2018/12/31_00:00	2019/01/02_00:00	SAMN08932715	assembly	Enterobacter_spp	E_asburiae	#N/A	1100		pENTAS02	absent	absent	-	present
SAMN10525003	blood	Homo_sapiens					GCF_003964805.1	ASM396480v1	Contig	NA	WCHEn090040	RXSJ01	4788302	30	515146	2497436	Enterobacter_sp._WCHEn090040_(enterobacteria)	Enterobacter_sp._WCHEn090040	ftp://ftp.ncbi.nlm.nih.gov/genomes/all/GCF/003/964/805/GCF_003964805.1_ASM396480v1	ftp://ftp.ncbi.nlm.nih.gov/genomes/all/GCA/003/964/805/GCA_003964805.1_ASM396480v1	West_China_Hospital,_Sichuan_University	2018/12/23_00:00	2018/12/23_00:00	2018/12/23_00:00	2018/12/28_00:00	SAMN10525003	assembly	Enterobacter_spp	E_quasiroggenkampii	#N/A	-		NA	absent	absent	-	present
SAMEA2273201	blood	Homo_sapiens					GCF_900077485.1	12045_4#72	Scaffold	NA	e627	FKFK01	4788481	52	181264	550	Enterobacter_cloacae_(enterobacteria)	Enterobacter_cloacae	ftp://ftp.ncbi.nlm.nih.gov/genomes/all/GCF/900/077/485/GCF_900077485.1_12045_4_72	ftp://ftp.ncbi.nlm.nih.gov/genomes/all/GCA/900/077/485/GCA_900077485.1_12045_4_72	SC	2016/04/13_00:00	2016/05/09_00:00	2016/05/09_00:00	2016/05/12_00:00	SAMEA2273201	assembly	Enterobacter_spp	E_xiangfangensis	3	114		NA	absent	absent	-	absent
SAMN09845189		Homo_sapiens					GCF_003965345.2	ASM396534v2	Complete_Genome	NA	WCHEH090011	NA	4788630	3	4639926	158836	Enterobacter_hormaechei_(enterobacteria)	Enterobacter_hormaechei	ftp://ftp.ncbi.nlm.nih.gov/genomes/all/GCF/003/965/345/GCF_003965345.2_ASM396534v2	ftp://ftp.ncbi.nlm.nih.gov/genomes/all/GCA/003/965/345/GCA_003965345.2_ASM396534v2	West_China_Hospital,_Sichuan_University	2019/02/28_00:00	2019/02/28_00:00	2019/02/28_00:00	2019/03/02_00:00	SAMN09845189	assembly	Enterobacter_spp	E_xiangfangensis	3	171		FIA_IncFIA_IncFIB_IncN_IncR_IncX3	absent	absent	blaNDM-5	absent
SAMEA104567507	faecal	Homo_sapiens					GCA_902160145.1	25426_7#149	Scaffold	NA	4928STDY7071396	CABGMS01	4788787	37	534218	550	Enterobacter_cloacae_(enterobacteria)	Enterobacter_cloacae	NA	ftp://ftp.ncbi.nlm.nih.gov/genomes/all/GCA/902/160/145/GCA_902160145.1_25426_7_149	SC	2019/07/08_00:00	2019/07/12_00:00	2019/07/12_00:00	2019/07/12_00:00	SAMEA104567507	assembly	Enterobacter_spp	E_xiangfangensis	3	63		IncR	absent	absent	-	absent
SAMN03280177	missing	Homo_sapiens	missing	missing	missing	missing	GCF_001037565.1	Ente_cloa_complex_BWH52_V1	Scaffold	NA	BWH52	LETB01	4788855	16	646161	1686386	Enterobacter_sp._BWH52_(enterobacteria)	Enterobacter_sp._BWH52	ftp://ftp.ncbi.nlm.nih.gov/genomes/all/GCF/001/037/565/GCF_001037565.1_Ente_cloa_complex_BWH52_V1	ftp://ftp.ncbi.nlm.nih.gov/genomes/all/GCA/001/037/565/GCA_001037565.1_Ente_cloa_complex_BWH52_V1	Broad_Institute	2015/06/22_00:00	2015/06/22_00:00	2015/06/22_00:00	2016/01/21_00:00	SAMN03280177	assembly	Enterobacter_spp	E_xiangfangensis	3	678		IncFIB_IncFII	absent	absent	-	absent
SAMN03197362	missing	Homo_sapiens	missing		UW_clinical_laboratory		GCF_001054505.1	ASM105450v1	Scaffold	NA	171_ECLO	JVRK01	4788973	72	143393	881260	Enterobacter_bugandensis_(enterobacteria)	Enterobacter_bugandensis	ftp://ftp.ncbi.nlm.nih.gov/genomes/all/GCF/001/054/505/GCF_001054505.1_ASM105450v1	ftp://ftp.ncbi.nlm.nih.gov/genomes/all/GCA/001/054/505/GCA_001054505.1_ASM105450v1	University_of_Washington	2015/07/10_00:00	2015/07/10_00:00	2015/07/10_00:00	2019/01/07_00:00	SAMN03197362	assembly	Enterobacter_spp	E_bugandensis	#N/A	660		NA	absent	absent	-	present
SAMN02138553	urine	missing					GCF_000534575.1	Ente_cloa_complex_MGH_13_V2	Scaffold	NA	MGH_13	JCLL01	4789060	25	430125	1329822	Enterobacter_hormaechei_subsp._hoffmannii_MGH_13_(enterobacteria)	Enterobacter_hormaechei	ftp://ftp.ncbi.nlm.nih.gov/genomes/all/GCF/000/534/575/GCF_000534575.1_Ente_cloa_complex_MGH_13_V2	ftp://ftp.ncbi.nlm.nih.gov/genomes/all/GCA/000/534/575/GCA_000534575.1_Ente_cloa_complex_MGH_13_V2	Broad_Institute	2014/02/03_00:00	2014/02/03_00:00	2014/02/03_00:00	2015/02/07_00:00	SAMN02138553	assembly	Enterobacter_spp	E_xiangfangensis	2	-		FIA_IncFIA_IncR	absent	absent	blaKPC-3	absent
SAMN09845188		Homo_sapiens					GCF_003965375.1	ASM396537v1	Contig	NA	WCHEH090010	RXQT01	4789109	158	135068	158836	Enterobacter_hormaechei_(enterobacteria)	Enterobacter_hormaechei	ftp://ftp.ncbi.nlm.nih.gov/genomes/all/GCF/003/965/375/GCF_003965375.1_ASM396537v1	ftp://ftp.ncbi.nlm.nih.gov/genomes/all/GCA/003/965/375/GCA_003965375.1_ASM396537v1	West_China_Hospital,_Sichuan_University	2018/12/23_00:00	2018/12/23_00:00	2018/12/23_00:00	2018/12/28_00:00	SAMN09845188	assembly	Enterobacter_spp	E_xiangfangensis	3	114		NA	absent	absent	-	absent
SAMN06767795	urine	Homo_sapiens	Unknown		Yonghong_Xiao		GCF_002785865.1	ASM278586v1	Scaffold	NA	ECC2572	NEEG01	4789183	36	2518331	881260	Enterobacter_bugandensis_(enterobacteria)	Enterobacter_bugandensis	ftp://ftp.ncbi.nlm.nih.gov/genomes/all/GCF/002/785/865/GCF_002785865.1_ASM278586v1	ftp://ftp.ncbi.nlm.nih.gov/genomes/all/GCA/002/785/865/GCA_002785865.1_ASM278586v1	zhejiang_University	2017/11/17_00:00	2017/11/17_00:00	2017/11/17_00:00	2019/01/07_00:00	SAMN06767795	assembly	Enterobacter_spp	E_bugandensis	#N/A	-		NA	absent	absent	-	present
SAMEA2273183	blood	Homo_sapiens					GCF_900077275.1	12082_4#42	Scaffold	NA	e532	FKEN01	4789757	48	232940	550	Enterobacter_cloacae_(enterobacteria)	Enterobacter_cloacae	ftp://ftp.ncbi.nlm.nih.gov/genomes/all/GCF/900/077/275/GCF_900077275.1_12082_4_42	ftp://ftp.ncbi.nlm.nih.gov/genomes/all/GCA/900/077/275/GCA_900077275.1_12082_4_42	SC	2016/04/13_00:00	2016/05/09_00:00	2016/05/09_00:00	2016/05/12_00:00	SAMEA2273183	assembly	Enterobacter_spp	E_xiangfangensis	4	68		IncR_pENTAS02	absent	absent	-	absent
SAMN04407766	Unknown	Homo_sapiens	Bloodstream_infection		Vance_Fowler		GCF_001518515.1	ASM151851v1	Contig	NA	GN02002	LRBZ01	4789850	130	61342	1296536	Enterobacter_hormaechei_subsp._xiangfangensis_(enterobacteria)	Enterobacter_hormaechei	ftp://ftp.ncbi.nlm.nih.gov/genomes/all/GCF/001/518/515/GCF_001518515.1_ASM151851v1	ftp://ftp.ncbi.nlm.nih.gov/genomes/all/GCA/001/518/515/GCA_001518515.1_ASM151851v1	JCVI	2016/01/19_00:00	2016/01/19_00:00	2016/01/19_00:00	2018/10/10_00:00	SAMN04407766	assembly	Enterobacter_spp	E_xiangfangensis	3	-		IncFIB_IncFII	absent	absent	-	absent
SAMEA2273306	blood	Homo_sapiens					GCF_900075215.1	11983_7#82	Scaffold	NA	e1198	FJXF01	4790146	76	154918	550	Enterobacter_cloacae_(enterobacteria)	Enterobacter_cloacae	ftp://ftp.ncbi.nlm.nih.gov/genomes/all/GCF/900/075/215/GCF_900075215.1_11983_7_82	ftp://ftp.ncbi.nlm.nih.gov/genomes/all/GCA/900/075/215/GCA_900075215.1_11983_7_82	SC	2016/04/05_00:00	2016/04/06_00:00	2016/04/06_00:00	2016/04/12_00:00	SAMEA2273306	assembly	Enterobacter_spp	E_xiangfangensis	4	108		IncFIB_IncFII	absent	absent	-	absent
SAMN03197390	missing	Homo_sapiens	missing		UW_clinical_laboratory		GCF_001055835.1	ASM105583v1	Scaffold	NA	198_ECLO	JVQI01	4790322	85	153999	881260	Enterobacter_bugandensis_(enterobacteria)	Enterobacter_bugandensis	ftp://ftp.ncbi.nlm.nih.gov/genomes/all/GCF/001/055/835/GCF_001055835.1_ASM105583v1	ftp://ftp.ncbi.nlm.nih.gov/genomes/all/GCA/001/055/835/GCA_001055835.1_ASM105583v1	University_of_Washington	2015/07/10_00:00	2015/07/10_00:00	2015/07/10_00:00	2019/01/07_00:00	SAMN03197390	assembly	Enterobacter_spp	E_bugandensis	#N/A	660		NA	absent	absent	-	present
SAMN04407772	Unknown	Homo_sapiens	Bloodstream_infection		Vance_Fowler		GCF_001518045.1	ASM151804v1	Contig	NA	GN03205	LRCE01	4790524	186	45551	61645	Enterobacter_asburiae_(enterobacteria)	Enterobacter_asburiae	ftp://ftp.ncbi.nlm.nih.gov/genomes/all/GCF/001/518/045/GCF_001518045.1_ASM151804v1	ftp://ftp.ncbi.nlm.nih.gov/genomes/all/GCA/001/518/045/GCA_001518045.1_ASM151804v1	JCVI	2016/01/19_00:00	2016/01/19_00:00	2016/01/19_00:00	2016/06/27_00:00	SAMN04407772	assembly	Enterobacter_spp	E_asburiae	#N/A	252		IncFIB_IncFII_IncR	absent	absent	-	present
SAMEA2273447	blood	Homo_sapiens					GCF_900076505.1	12045_5#25	Scaffold	NA	e2273	FKCR01	4790862	47	183062	550	Enterobacter_cloacae_(enterobacteria)	Enterobacter_cloacae	ftp://ftp.ncbi.nlm.nih.gov/genomes/all/GCF/900/076/505/GCF_900076505.1_12045_5_25	ftp://ftp.ncbi.nlm.nih.gov/genomes/all/GCA/900/076/505/GCA_900076505.1_12045_5_25	SC	2016/04/13_00:00	2016/05/09_00:00	2016/05/09_00:00	2016/05/14_00:00	SAMEA2273447	assembly	Enterobacter_spp	E_xiangfangensis	2	78		IncFIB	absent	absent	-	absent
SAMN08027259		Homo_sapiens					GCF_003965785.1	ASM396578v1	Contig	NA	SCEH020051	RXPQ01	4790974	109	211130	158836	Enterobacter_hormaechei_(enterobacteria)	Enterobacter_hormaechei	ftp://ftp.ncbi.nlm.nih.gov/genomes/all/GCF/003/965/785/GCF_003965785.1_ASM396578v1	ftp://ftp.ncbi.nlm.nih.gov/genomes/all/GCA/003/965/785/GCA_003965785.1_ASM396578v1	West_China_Hospital,_Sichuan_University	2018/12/23_00:00	2018/12/23_00:00	2018/12/23_00:00	2018/12/28_00:00	SAMN08027259	assembly	Enterobacter_spp	E_xiangfangensis	3	127		IncN_IncR_IncX3	absent	absent	blaNDM-5,blaIMP-4	absent
SAMEA2273363	blood	Homo_sapiens					GCF_900075775.1	11983_6#44	Scaffold	NA	e1487	FJZD01	4791577	51	195333	550	Enterobacter_cloacae_(enterobacteria)	Enterobacter_cloacae	ftp://ftp.ncbi.nlm.nih.gov/genomes/all/GCF/900/075/775/GCF_900075775.1_11983_6_44	ftp://ftp.ncbi.nlm.nih.gov/genomes/all/GCA/900/075/775/GCA_900075775.1_11983_6_44	SC	2016/04/05_00:00	2016/04/06_00:00	2016/04/06_00:00	2016/04/08_00:00	SAMEA2273363	assembly	Enterobacter_spp	E_xiangfangensis	4	68		IncR_pENTAS02	absent	absent	-	absent
SAMEA2273141	blood	Homo_sapiens					GCF_900076835.1	12045_4#20	Scaffold	NA	e287	FKCK01	4792403	55	192822	550	Enterobacter_cloacae_(enterobacteria)	Enterobacter_cloacae	ftp://ftp.ncbi.nlm.nih.gov/genomes/all/GCF/900/076/835/GCF_900076835.1_12045_4_20	ftp://ftp.ncbi.nlm.nih.gov/genomes/all/GCA/900/076/835/GCA_900076835.1_12045_4_20	SC	2016/04/13_00:00	2016/05/09_00:00	2016/05/09_00:00	2016/05/14_00:00	SAMEA2273141	assembly	Enterobacter_spp	E_xiangfangensis	4	68		IncR_pENTAS02	absent	absent	-	absent
SAMN10872819							GCF_004193715.1	ASM419371v1	Complete_Genome	NA	CZ-1	NA	4792737	1	4792737	550	Enterobacter_cloacae_(enterobacteria)	Enterobacter_cloacae	ftp://ftp.ncbi.nlm.nih.gov/genomes/all/GCF/004/193/715/GCF_004193715.1_ASM419371v1	ftp://ftp.ncbi.nlm.nih.gov/genomes/all/GCA/004/193/715/GCA_004193715.1_ASM419371v1	Nanjing_Agricultural_University	2019/02/13_00:00	2019/02/13_00:00	2019/02/13_00:00	2019/02/19_00:00	SAMN10872819	assembly	Enterobacter_spp	Unidentified-2	#N/A	-		NA	absent	absent	-	present
SAMEA2273142	blood	Homo_sapiens					GCF_900076855.1	12045_4#21	Scaffold	NA	e288	FKCE01	4792973	49	232951	550	Enterobacter_cloacae_(enterobacteria)	Enterobacter_cloacae	ftp://ftp.ncbi.nlm.nih.gov/genomes/all/GCF/900/076/855/GCF_900076855.1_12045_4_21	ftp://ftp.ncbi.nlm.nih.gov/genomes/all/GCA/900/076/855/GCA_900076855.1_12045_4_21	SC	2016/04/13_00:00	2016/05/09_00:00	2016/05/09_00:00	2016/05/14_00:00	SAMEA2273142	assembly	Enterobacter_spp	E_xiangfangensis	4	68		IncR_pENTAS02	absent	absent	-	absent
SAMN04497989	vegetable				NIH		GCF_001653545.1	ASM165354v1	Scaffold	NA	INSali2	LSUR01	4792991	45	344398	158836	Enterobacter_hormaechei_(enterobacteria)	Enterobacter_hormaechei	ftp://ftp.ncbi.nlm.nih.gov/genomes/all/GCF/001/653/545/GCF_001653545.1_ASM165354v1	ftp://ftp.ncbi.nlm.nih.gov/genomes/all/GCA/001/653/545/GCA_001653545.1_ASM165354v1	National_Institute_of_Health_Dr_Ricardo_Jorge	2016/05/31_00:00	2016/05/31_00:00	2016/05/31_00:00	2019/01/07_00:00	SAMN04497989	assembly	Enterobacter_spp	E_xiangfangensis	1	636		IncX1	absent	absent	-	present
SAMEA2273467	blood	Homo_sapiens					GCF_900076755.1	12045_5#47	Scaffold	NA	e2752	FKCF01	4793330	96	86966	550	Enterobacter_cloacae_(enterobacteria)	Enterobacter_cloacae	ftp://ftp.ncbi.nlm.nih.gov/genomes/all/GCF/900/076/755/GCF_900076755.1_12045_5_47	ftp://ftp.ncbi.nlm.nih.gov/genomes/all/GCA/900/076/755/GCA_900076755.1_12045_5_47	SC	2016/04/13_00:00	2016/05/09_00:00	2016/05/09_00:00	2016/05/14_00:00	SAMEA2273467	assembly	Enterobacter_spp	E_xiangfangensis	2	-		IncFIB	absent	absent	-	absent
SAMN06921699							GCF_002918795.1	ASM291879v1	Contig	NA	ECNIH17	PQLD01	4793923	77	130230	2080668	Enterobacter_cloacae_complex_sp._ECNIH17_(enterobacteria)	Enterobacter_cloacae_complex_sp._ECNIH17	ftp://ftp.ncbi.nlm.nih.gov/genomes/all/GCF/002/918/795/GCF_002918795.1_ASM291879v1	ftp://ftp.ncbi.nlm.nih.gov/genomes/all/GCA/002/918/795/GCA_002918795.1_ASM291879v1	NIH	2018/02/06_00:00	2018/02/06_00:00	2018/02/06_00:00	2018/02/09_00:00	SAMN06921699	assembly	Enterobacter_spp	E_xiangfangensis	2	97		IncFIB_IncFII_IncN_IncR	absent	absent	blaKPC-2	absent
SAMN07714121	nares	pig					GCF_003086195.1	ASM308619v1	Scaffold	NA	PN108E5IIB	PCFC01	4794257	104	117633	2041080	Enterobacter_sp._PN108E5IIB_(enterobacteria)	Enterobacter_sp._PN108E5IIB	ftp://ftp.ncbi.nlm.nih.gov/genomes/all/GCF/003/086/195/GCF_003086195.1_ASM308619v1	ftp://ftp.ncbi.nlm.nih.gov/genomes/all/GCA/003/086/195/GCA_003086195.1_ASM308619v1	National_Institute_for_Communicable_Diseases	2018/05/02_00:00	2018/05/02_00:00	2018/05/02_00:00	2018/08/29_00:00	SAMN07714121	assembly	Enterobacter_spp	E_chengduensis	#N/A	-		NA	absent	absent	-	present
SAMN03197827	missing	Homo_sapiens	missing		UW_clinical_laboratory		GCF_001055515.1	ASM105551v1	Scaffold	NA	627_ECLO	JUZN01	4794382	170	68093	881260	Enterobacter_bugandensis_(enterobacteria)	Enterobacter_bugandensis	ftp://ftp.ncbi.nlm.nih.gov/genomes/all/GCF/001/055/515/GCF_001055515.1_ASM105551v1	ftp://ftp.ncbi.nlm.nih.gov/genomes/all/GCA/001/055/515/GCA_001055515.1_ASM105551v1	University_of_Washington	2015/07/10_00:00	2015/07/10_00:00	2015/07/10_00:00	2019/01/07_00:00	SAMN03197827	assembly	Enterobacter_spp	E_bugandensis	#N/A	670		NA	absent	absent	-	present
SAMEA2273437	blood	Homo_sapiens					GCF_900076415.1	12045_5#15	Scaffold	NA	e2054	FKBN01	4794858	42	223486	550	Enterobacter_cloacae_(enterobacteria)	Enterobacter_cloacae	ftp://ftp.ncbi.nlm.nih.gov/genomes/all/GCF/900/076/415/GCF_900076415.1_12045_5_15	ftp://ftp.ncbi.nlm.nih.gov/genomes/all/GCA/900/076/415/GCA_900076415.1_12045_5_15	SC	2016/04/13_00:00	2016/05/09_00:00	2016/05/09_00:00	2016/05/14_00:00	SAMEA2273437	assembly	Enterobacter_spp	E_xiangfangensis	1	801		NA	present	absent	-	present
SAMEA2273212	blood	Homo_sapiens					GCF_900075265.1	12045_4#83	Scaffold	NA	e1101	FJXE01	4795310	54	225145	550	Enterobacter_cloacae_(enterobacteria)	Enterobacter_cloacae	ftp://ftp.ncbi.nlm.nih.gov/genomes/all/GCF/900/075/265/GCF_900075265.1_12045_4_83	ftp://ftp.ncbi.nlm.nih.gov/genomes/all/GCA/900/075/265/GCA_900075265.1_12045_4_83	SC	2016/04/05_00:00	2016/04/06_00:00	2016/04/06_00:00	2016/04/08_00:00	SAMEA2273212	assembly	Enterobacter_spp	E_xiangfangensis	4	68		IncR_pENTAS02	absent	absent	-	absent
SAMN08107552	gut_(3-4th_instar_larva)	Galleria_mellonella					GCF_002850575.1	ASM285057v1	Complete_Genome	NA	CR-Eb1	NA	4796512	1	4796512	69218	Enterobacter_cancerogenus_(enterobacteria)	Enterobacter_cancerogenus	ftp://ftp.ncbi.nlm.nih.gov/genomes/all/GCF/002/850/575/GCF_002850575.1_ASM285057v1	ftp://ftp.ncbi.nlm.nih.gov/genomes/all/GCA/002/850/575/GCA_002850575.1_ASM285057v1	Korea_Research_Institute_of_Bioscience_and_Biotechnology_(KRIBB)	2018/01/03_00:00	2018/01/03_00:00	2018/01/03_00:00	2018/01/11_00:00	SAMN08107552	assembly	Enterobacter_spp	E_cancerogenus	#N/A	-		NA	absent	absent	-	present
SAMN03732693	bodily_fluid	Homo_sapiens			Vance_Fowler		GCF_001023305.1	ASM102330v1	Contig	NA	GN02283	LEEJ01	4796531	39	237461	881260	Enterobacter_bugandensis_(enterobacteria)	Enterobacter_bugandensis	ftp://ftp.ncbi.nlm.nih.gov/genomes/all/GCF/001/023/305/GCF_001023305.1_ASM102330v1	ftp://ftp.ncbi.nlm.nih.gov/genomes/all/GCA/001/023/305/GCA_001023305.1_ASM102330v1	JCVI	2015/06/09_00:00	2015/06/09_00:00	2015/06/09_00:00	2015/06/10_00:00	SAMN03732693	assembly	Enterobacter_spp	E_bugandensis	#N/A	695		NA	absent	absent	-	present
SAMEA2273279	blood	Homo_sapiens					GCF_900078155.1	11983_7#55	Scaffold	NA	e985	FKID01	4796653	70	195973	550	Enterobacter_cloacae_(enterobacteria)	Enterobacter_cloacae	ftp://ftp.ncbi.nlm.nih.gov/genomes/all/GCF/900/078/155/GCF_900078155.1_11983_7_55	ftp://ftp.ncbi.nlm.nih.gov/genomes/all/GCA/900/078/155/GCA_900078155.1_11983_7_55	SC	2016/04/13_00:00	2016/05/09_00:00	2016/05/09_00:00	2016/05/14_00:00	SAMEA2273279	assembly	Enterobacter_spp	E_xiangfangensis	4	108		IncFIB_IncFII_IncR	absent	absent	-	absent
SAMN04407773	Unknown	Homo_sapiens	Bloodstream_infection		Vance_Fowler		GCF_001518145.1	ASM151814v1	Contig	NA	GN03433	LRCF01	4796700	182	43016	1296536	Enterobacter_hormaechei_subsp._xiangfangensis_(enterobacteria)	Enterobacter_hormaechei	ftp://ftp.ncbi.nlm.nih.gov/genomes/all/GCF/001/518/145/GCF_001518145.1_ASM151814v1	ftp://ftp.ncbi.nlm.nih.gov/genomes/all/GCA/001/518/145/GCA_001518145.1_ASM151814v1	JCVI	2016/01/19_00:00	2016/01/19_00:00	2016/01/19_00:00	2018/10/10_00:00	SAMN04407773	assembly	Enterobacter_spp	E_xiangfangensis	3	127		IncFIB_IncFII	absent	absent	-	absent
SAMN04158295	urine	Homo_sapiens	missing		Norwegian_National_Advisory_Unit_on_Detection_of_Antimicrobial_Resistance		GCF_001462935.1	ASM146293v1	Contig	NA	50588862	LNHM01	4796949	51	692189	1736698	Enterobacter_sp._50588862_(enterobacteria)	Enterobacter_sp._50588862	ftp://ftp.ncbi.nlm.nih.gov/genomes/all/GCF/001/462/935/GCF_001462935.1_ASM146293v1	ftp://ftp.ncbi.nlm.nih.gov/genomes/all/GCA/001/462/935/GCA_001462935.1_ASM146293v1	Norwegian_National_Advisory_Unit_on_Detection_of_Antimicrobial_Resistance	2015/12/09_00:00	2015/12/09_00:00	2015/12/09_00:00	2016/01/27_00:00	SAMN04158295	assembly	Enterobacter_spp	E_bugandensis	#N/A	635		NA	absent	absent	blaIMI-9	present
SAMN11483247	desert_sand						GCF_005116565.1	ASM511656v1	Contig	NA	MDMC82	SWCT01	4796963	267	226473	158836	Enterobacter_hormaechei_(enterobacteria)	Enterobacter_hormaechei	ftp://ftp.ncbi.nlm.nih.gov/genomes/all/GCF/005/116/565/GCF_005116565.1_ASM511656v1	ftp://ftp.ncbi.nlm.nih.gov/genomes/all/GCA/005/116/565/GCA_005116565.1_ASM511656v1	MedBiotech_laboratory,_faculty_of_medicine_and_pharmacy,_rabat/_Mohamed_V_university_rabat	2019/05/02_00:00	2019/05/02_00:00	2019/05/02_00:00	2019/05/05_00:00	SAMN11483247	assembly	Enterobacter_spp	E_xiangfangensis	3	600		IncFIB_IncFII	present	absent	-	absent
SAMN07345016	blood	Homo_sapiens	bacteremia		The_Central_Hospital_of_Lishui_City		GCF_002264185.1	ASM226418v1	Contig	NA	EN3287	NPGJ01	4797988	56	174222	158836	Enterobacter_hormaechei_(enterobacteria)	Enterobacter_hormaechei	ftp://ftp.ncbi.nlm.nih.gov/genomes/all/GCF/002/264/185/GCF_002264185.1_ASM226418v1	ftp://ftp.ncbi.nlm.nih.gov/genomes/all/GCA/002/264/185/GCA_002264185.1_ASM226418v1	Zhejiang_University	2017/08/22_00:00	2017/08/22_00:00	2017/08/22_00:00	2019/01/07_00:00	SAMN07345016	assembly	Enterobacter_spp	E_xiangfangensis	3	600		IncFIB_IncFII_IncX3	present	absent	blaNDM-1	absent
SAMN02604307							GCF_000239975.1	ASM23997v1	Complete_Genome	NA	EcWSU1	NA	4798091	2	4734438	299767	Enterobacter_ludwigii_(enterobacteria)	Enterobacter_ludwigii	ftp://ftp.ncbi.nlm.nih.gov/genomes/all/GCF/000/239/975/GCF_000239975.1_ASM23997v1	ftp://ftp.ncbi.nlm.nih.gov/genomes/all/GCA/000/239/975/GCA_000239975.1_ASM23997v1	Washington_State_University	2011/12/23_00:00	2011/12/23_00:00	2011/12/23_00:00	2019/03/07_00:00	SAMN02604307	assembly	Enterobacter_spp	E_ludwigii	#N/A	2		IncFII	absent	absent	-	present
SAMN06130962	root	Zea_mays					GCF_002025685.1	ASM202568v1	Complete_Genome	NA	AA4	NA	4799256	1	4799256	299767	Enterobacter_ludwigii_(enterobacteria)	Enterobacter_ludwigii	ftp://ftp.ncbi.nlm.nih.gov/genomes/all/GCF/002/025/685/GCF_002025685.1_ASM202568v1	ftp://ftp.ncbi.nlm.nih.gov/genomes/all/GCA/002/025/685/GCA_002025685.1_ASM202568v1	Harvard_University	2017/03/13_00:00	2017/03/13_00:00	2017/03/13_00:00	2019/03/07_00:00	SAMN06130962	assembly	Enterobacter_spp	E_ludwigii	#N/A	-		NA	absent	absent	-	present
SAMN09845226		Homo_sapiens					GCF_003964455.1	ASM396445v1	Contig	NA	WCHEH090061	RXSE01	4799633	53	404561	158836	Enterobacter_hormaechei_(enterobacteria)	Enterobacter_hormaechei	ftp://ftp.ncbi.nlm.nih.gov/genomes/all/GCF/003/964/455/GCF_003964455.1_ASM396445v1	ftp://ftp.ncbi.nlm.nih.gov/genomes/all/GCA/003/964/455/GCA_003964455.1_ASM396445v1	West_China_Hospital,_Sichuan_University	2018/12/23_00:00	2018/12/23_00:00	2018/12/23_00:00	2018/12/28_00:00	SAMN09845226	assembly	Enterobacter_spp	E_xiangfangensis	1	51		IncFIB_IncN	absent	absent	-	present
SAMN04606413	urine	Homo_sapiens	missing	missing	missing	missing	GCF_002087625.1	ASM208762v1	Scaffold	NA	OS_04_026_-1	NCRW01	4800124	14	589319	158836	Enterobacter_hormaechei_(enterobacteria)	Enterobacter_hormaechei	ftp://ftp.ncbi.nlm.nih.gov/genomes/all/GCF/002/087/625/GCF_002087625.1_ASM208762v1	ftp://ftp.ncbi.nlm.nih.gov/genomes/all/GCA/002/087/625/GCA_002087625.1_ASM208762v1	Broad_Institute	2017/04/12_00:00	2017/04/12_00:00	2017/04/12_00:00	2018/11/14_00:00	SAMN04606413	assembly	Enterobacter_spp	E_xiangfangensis	1	50		NA	absent	absent	-	present
SAMEA2273262	blood	Homo_sapiens					GCF_900078005.1	11983_7#37	Scaffold	NA	e901	FKHN01	4800136	49	250436	550	Enterobacter_cloacae_(enterobacteria)	Enterobacter_cloacae	ftp://ftp.ncbi.nlm.nih.gov/genomes/all/GCF/900/078/005/GCF_900078005.1_11983_7_37	ftp://ftp.ncbi.nlm.nih.gov/genomes/all/GCA/900/078/005/GCA_900078005.1_11983_7_37	SC	2016/04/13_00:00	2016/05/09_00:00	2016/05/09_00:00	2016/05/14_00:00	SAMEA2273262	assembly	Enterobacter_spp	E_xiangfangensis	1	742		IncFIB_IncFII	absent	absent	-	present
SAMN03280180	missing	Homo_sapiens	missing	missing	missing	missing	GCF_001037645.1	Ente_cloa_complex_BWH64_V1	Scaffold	NA	BWH64	LETD01	4800284	9	674016	1686388	Enterobacter_sp._BWH64_(enterobacteria)	Enterobacter_sp._BWH64	ftp://ftp.ncbi.nlm.nih.gov/genomes/all/GCF/001/037/645/GCF_001037645.1_Ente_cloa_complex_BWH64_V1	ftp://ftp.ncbi.nlm.nih.gov/genomes/all/GCA/001/037/645/GCA_001037645.1_Ente_cloa_complex_BWH64_V1	Broad_Institute	2015/06/22_00:00	2015/06/22_00:00	2015/06/22_00:00	2016/01/21_00:00	SAMN03280180	assembly	Enterobacter_spp	E_xiangfangensis	1	45		NA	absent	absent	-	present
SAMN03732720	bodily_fluid	Homo_sapiens			Vance_Fowler		GCF_001022735.1	ASM102273v1	Contig	NA	GN02645	LEDK01	4800493	36	301134	1296536	Enterobacter_hormaechei_subsp._xiangfangensis_(enterobacteria)	Enterobacter_hormaechei	ftp://ftp.ncbi.nlm.nih.gov/genomes/all/GCF/001/022/735/GCF_001022735.1_ASM102273v1	ftp://ftp.ncbi.nlm.nih.gov/genomes/all/GCA/001/022/735/GCA_001022735.1_ASM102273v1	JCVI	2015/06/09_00:00	2015/06/09_00:00	2015/06/09_00:00	2018/10/10_00:00	SAMN03732720	assembly	Enterobacter_spp	E_xiangfangensis	3	114		IncFIB_IncFII	absent	absent	-	absent
SAMN08741157		Homo_sapiens					GCF_003056935.1	ASM305693v1	Contig	NA	WCHEM045008	PYBR01	4800749	44	410072	539813	Enterobacter_mori_(enterobacteria)	Enterobacter_mori	ftp://ftp.ncbi.nlm.nih.gov/genomes/all/GCF/003/056/935/GCF_003056935.1_ASM305693v1	ftp://ftp.ncbi.nlm.nih.gov/genomes/all/GCA/003/056/935/GCA_003056935.1_ASM305693v1	West_China_Hospital,_Sichuan_University	2018/04/18_00:00	2018/04/18_00:00	2018/04/18_00:00	2018/04/25_00:00	SAMN08741157	assembly	Enterobacter_spp	E_mori	#N/A	-		NA	absent	absent	-	present
SAMN04448597	wound	Homo_sapiens	cellulitis		Delta_County_Memorial_Hospital		GCF_001562175.1	ASM156217v1	Chromosome	MBRL1077		NA	4801156	2	4361074	550	Enterobacter_cloacae_(enterobacteria)	Enterobacter_cloacae	ftp://ftp.ncbi.nlm.nih.gov/genomes/all/GCF/001/562/175/GCF_001562175.1_ASM156217v1	ftp://ftp.ncbi.nlm.nih.gov/genomes/all/GCA/001/562/175/GCA_001562175.1_ASM156217v1	Mayo_Clinic	2016/02/17_00:00	2016/02/17_00:00	2016/02/17_00:00	2016/02/18_00:00	SAMN04448597	assembly	Enterobacter_spp	E_bugandensis	#N/A	-		NA	absent	absent	blaIMI-1	present
SAMN03283685	Unknown	Unknown	Unknown		Barry_Kreiswirth		GCF_000957405.1	ASM95740v1	Contig	NA	44888	JZXQ01	4801272	79	168591	1296536	Enterobacter_hormaechei_subsp._xiangfangensis_(enterobacteria)	Enterobacter_hormaechei	ftp://ftp.ncbi.nlm.nih.gov/genomes/all/GCF/000/957/405/GCF_000957405.1_ASM95740v1	ftp://ftp.ncbi.nlm.nih.gov/genomes/all/GCA/000/957/405/GCA_000957405.1_ASM95740v1	JCVI	2015/03/19_00:00	2015/03/19_00:00	2015/03/19_00:00	2018/10/10_00:00	SAMN03283685	assembly	Enterobacter_spp	E_xiangfangensis	3	597		IncFIB_IncFII	absent	absent	-	absent
SAMN03020201	root	finger_millet					GCF_000762975.1	ASM76297v1	Contig	NA	UCD-UG_FMILLET	JRJC01	4801411	53	236194	1542468	Enterobacter_sp._UCD-UG_FMILLET_(enterobacteria)	Enterobacter_sp._UCD-UG_FMILLET	ftp://ftp.ncbi.nlm.nih.gov/genomes/all/GCF/000/762/975/GCF_000762975.1_ASM76297v1	ftp://ftp.ncbi.nlm.nih.gov/genomes/all/GCA/000/762/975/GCA_000762975.1_ASM76297v1	UC_Davis	2014/10/02_00:00	2014/10/02_00:00	2014/10/02_00:00	2015/06/17_00:00	SAMN03020201	assembly	Enterobacter_spp	E_dykesii	#N/A	-		IncFIA_IncFIB_IncFII	absent	absent	-	present
SAMEA104567508	faecal	Homo_sapiens					GCA_902160155.1	25426_7#150	Scaffold	NA	4928STDY7071397	CABGMZ01	4801759	36	615737	550	Enterobacter_cloacae_(enterobacteria)	Enterobacter_cloacae	NA	ftp://ftp.ncbi.nlm.nih.gov/genomes/all/GCA/902/160/155/GCA_902160155.1_25426_7_150	SC	2019/07/08_00:00	2019/07/12_00:00	2019/07/12_00:00	2019/07/12_00:00	SAMEA104567508	assembly	Enterobacter_spp	E_xiangfangensis	3	63		IncR	absent	absent	-	absent
SAMEA2273388	blood	Homo_sapiens					GCF_900075945.1	11983_6#67	Scaffold	NA	e1605	FJZT01	4802016	37	341655	550	Enterobacter_cloacae_(enterobacteria)	Enterobacter_cloacae	ftp://ftp.ncbi.nlm.nih.gov/genomes/all/GCF/900/075/945/GCF_900075945.1_11983_6_67	ftp://ftp.ncbi.nlm.nih.gov/genomes/all/GCA/900/075/945/GCA_900075945.1_11983_6_67	SC	2016/04/04_00:00	2016/04/06_00:00	2016/04/06_00:00	2016/04/13_00:00	SAMEA2273388	assembly	Enterobacter_spp	E_xiangfangensis	1	93		NA	absent	absent	-	present
SAMN03197829	missing	Homo_sapiens	missing		UW_clinical_laboratory		GCF_001057695.1	ASM105769v1	Scaffold	NA	629_ECLO	JUZL01	4802483	113	113495	881260	Enterobacter_bugandensis_(enterobacteria)	Enterobacter_bugandensis	ftp://ftp.ncbi.nlm.nih.gov/genomes/all/GCF/001/057/695/GCF_001057695.1_ASM105769v1	ftp://ftp.ncbi.nlm.nih.gov/genomes/all/GCA/001/057/695/GCA_001057695.1_ASM105769v1	University_of_Washington	2015/07/10_00:00	2015/07/10_00:00	2015/07/10_00:00	2019/01/07_00:00	SAMN03197829	assembly	Enterobacter_spp	E_bugandensis	#N/A	670		NA	absent	absent	-	present
SAMN06767789	urine	Homo_sapiens	Unknown		Yonghong_Xiao		GCF_002785915.1	ASM278591v1	Scaffold	NA	ECC2288	NEEM01	4802666	55	164625	550	Enterobacter_cloacae_(enterobacteria)	Enterobacter_cloacae	ftp://ftp.ncbi.nlm.nih.gov/genomes/all/GCF/002/785/915/GCF_002785915.1_ASM278591v1	ftp://ftp.ncbi.nlm.nih.gov/genomes/all/GCA/002/785/915/GCA_002785915.1_ASM278591v1	zhejiang_University	2017/11/17_00:00	2017/11/17_00:00	2017/11/17_00:00	2017/11/22_00:00	SAMN06767789	assembly	Enterobacter_spp	E_cloacae	#N/A	627		NA	absent	absent	-	present
SAMN02469368	feces	Tenebrio_molitor					GCF_000328905.1	ASM32890v1	Scaffold	NA	YT2	ANIA01	4802857	15	948277	1259823	Enterobacter_hormaechei_YT2_(enterobacteria)	Enterobacter_hormaechei	ftp://ftp.ncbi.nlm.nih.gov/genomes/all/GCF/000/328/905/GCF_000328905.1_ASM32890v1	ftp://ftp.ncbi.nlm.nih.gov/genomes/all/GCA/000/328/905/GCA_000328905.1_ASM32890v1	BGI_Research_Institution	2013/01/02_00:00	2013/01/18_00:00	2013/01/18_00:00	2014/10/09_00:00	SAMN02469368	assembly	Enterobacter_spp	E_xiangfangensis	1	744		NA	absent	absent	-	present
SAMN03197808	missing	Homo_sapiens	missing		UW_clinical_laboratory		GCF_001057535.1	ASM105753v1	Contig	NA	608_ECLO	JVAG01	4804191	222	48185	299767	Enterobacter_ludwigii_(enterobacteria)	Enterobacter_ludwigii	ftp://ftp.ncbi.nlm.nih.gov/genomes/all/GCF/001/057/535/GCF_001057535.1_ASM105753v1	ftp://ftp.ncbi.nlm.nih.gov/genomes/all/GCA/001/057/535/GCA_001057535.1_ASM105753v1	University_of_Washington	2015/07/10_00:00	2015/07/10_00:00	2015/07/10_00:00	2016/07/19_00:00	SAMN03197808	assembly	Enterobacter_spp	E_ludwigii	#N/A	668		IncFIB_IncFII	absent	absent	-	present
SAMEA2273286	blood	Homo_sapiens					GCF_900075355.1	11983_7#62	Scaffold	NA	e1069	FJWV01	4805439	57	190068	550	Enterobacter_cloacae_(enterobacteria)	Enterobacter_cloacae	ftp://ftp.ncbi.nlm.nih.gov/genomes/all/GCF/900/075/355/GCF_900075355.1_11983_7_62	ftp://ftp.ncbi.nlm.nih.gov/genomes/all/GCA/900/075/355/GCA_900075355.1_11983_7_62	SC	2016/04/05_00:00	2016/04/06_00:00	2016/04/06_00:00	2016/04/18_00:00	SAMEA2273286	assembly	Enterobacter_spp	E_xiangfangensis	1	-		NA	absent	absent	-	present
SAMEA2273249	blood	Homo_sapiens					GCF_900077875.1	11983_7#24	Scaffold	NA	e840	FKHA01	4805978	40	306228	550	Enterobacter_cloacae_(enterobacteria)	Enterobacter_cloacae	ftp://ftp.ncbi.nlm.nih.gov/genomes/all/GCF/900/077/875/GCF_900077875.1_11983_7_24	ftp://ftp.ncbi.nlm.nih.gov/genomes/all/GCA/900/077/875/GCA_900077875.1_11983_7_24	SC	2016/04/13_00:00	2016/05/09_00:00	2016/05/09_00:00	2016/05/13_00:00	SAMEA2273249	assembly	Enterobacter_spp	E_xiangfangensis	1	45		IncFII	absent	absent	-	present
SAMN09832881	Chicken_processing_plant				Texas_Tech_University		GCF_003409995.1	ASM340999v1	Scaffold	NA	AR-44	QUZN01	4806058	113	160759	158836	Enterobacter_hormaechei_(enterobacteria)	Enterobacter_hormaechei	ftp://ftp.ncbi.nlm.nih.gov/genomes/all/GCF/003/409/995/GCF_003409995.1_ASM340999v1	ftp://ftp.ncbi.nlm.nih.gov/genomes/all/GCA/003/409/995/GCA_003409995.1_ASM340999v1	Texas_Tech_University	2018/08/20_00:00	2018/08/20_00:00	2018/08/20_00:00	2018/08/22_00:00	SAMN09832881	assembly	Enterobacter_spp	E_xiangfangensis	3	114		IncR	absent	absent	-	absent
SAMEA2273386	blood	Homo_sapiens					GCF_900075915.1	11983_6#66	Scaffold	NA	e1589	FJZR01	4806205	43	190510	550	Enterobacter_cloacae_(enterobacteria)	Enterobacter_cloacae	ftp://ftp.ncbi.nlm.nih.gov/genomes/all/GCF/900/075/915/GCF_900075915.1_11983_6_66	ftp://ftp.ncbi.nlm.nih.gov/genomes/all/GCA/900/075/915/GCA_900075915.1_11983_6_66	SC	2016/04/05_00:00	2016/04/06_00:00	2016/04/06_00:00	2016/04/12_00:00	SAMEA2273386	assembly	Enterobacter_spp	E_xiangfangensis	1	146		IncA/C_IncA/C2	absent	absent	-	present
SAMN03742638	physical	Homo_sapiens	missing		Gengmi_Li		GCF_001521715.1	ASM152171v1	Complete_Genome	NA	ATCC_35953	NA	4806219	5	4713742	61645	Enterobacter_asburiae_(enterobacteria)	Enterobacter_asburiae	ftp://ftp.ncbi.nlm.nih.gov/genomes/all/GCF/001/521/715/GCF_001521715.1_ASM152171v1	ftp://ftp.ncbi.nlm.nih.gov/genomes/all/GCA/001/521/715/GCA_001521715.1_ASM152171v1	Chengdu_Military_General_Hospital	2016/01/21_00:00	2016/01/21_00:00	2016/01/21_00:00	2016/01/22_00:00	SAMN03742638	assembly	Enterobacter_spp	E_asburiae	#N/A	807	yes	NA	absent	absent	-	absent
SAMN02356619	urine	Homo_sapiens					GCF_000534155.1	Ente_cloa_UCI_39_V1	Scaffold	NA	UCI_39	JCKQ01	4806374	12	1337150	1400152	Enterobacter_roggenkampii_UCI_39_(enterobacteria)	Enterobacter_roggenkampii	ftp://ftp.ncbi.nlm.nih.gov/genomes/all/GCF/000/534/155/GCF_000534155.1_Ente_cloa_UCI_39_V1	ftp://ftp.ncbi.nlm.nih.gov/genomes/all/GCA/000/534/155/GCA_000534155.1_Ente_cloa_UCI_39_V1	Broad_Institute	2014/02/03_00:00	2014/02/03_00:00	2014/02/03_00:00	2014/10/09_00:00	SAMN02356619	assembly	Enterobacter_spp	E_roggenkampii	#N/A	743		IncFIB_IncFII	absent	present	-	present
SAMEA2273322	blood	Homo_sapiens					GCF_900074965.1	11983_6#2	Scaffold	NA	e1284	FJXJ01	4806682	53	170799	550	Enterobacter_cloacae_(enterobacteria)	Enterobacter_cloacae	ftp://ftp.ncbi.nlm.nih.gov/genomes/all/GCF/900/074/965/GCF_900074965.1_11983_6_2	ftp://ftp.ncbi.nlm.nih.gov/genomes/all/GCA/900/074/965/GCA_900074965.1_11983_6_2	SC	2016/04/05_00:00	2016/04/06_00:00	2016/04/06_00:00	2016/04/12_00:00	SAMEA2273322	assembly	Enterobacter_spp	E_xiangfangensis	4	94		IncFIB	absent	absent	-	present
SAMN09469734	infected_leaf	Arachis_hypogaea			K.S._Chudasama		GCF_003339705.1	ASM333970v1	Contig	NA	SUBG009	QPKG01	4806842	54	190844	550	Enterobacter_cloacae_(enterobacteria)	Enterobacter_cloacae	ftp://ftp.ncbi.nlm.nih.gov/genomes/all/GCF/003/339/705/GCF_003339705.1_ASM333970v1	ftp://ftp.ncbi.nlm.nih.gov/genomes/all/GCA/003/339/705/GCA_003339705.1_ASM333970v1	SaurashtraUniversity	2018/07/25_00:00	2018/07/25_00:00	2018/07/25_00:00	2018/07/31_00:00	SAMN09469734	assembly	Enterobacter_spp	E_cloacae	#N/A	-		NA	absent	absent	-	present
SAMN03771262	blood	Homo_sapiens	acute_lymphoblastic_leukemia		Zhiyong_Zong		GCF_001039365.2	ASM103936v2	Contig	NA	WCHECl-1060	LFDQ02	4807091	20	715650	336306	Enterobacter_cloacae_subsp._cloacae_(enterobacteria)	Enterobacter_cloacae	ftp://ftp.ncbi.nlm.nih.gov/genomes/all/GCF/001/039/365/GCF_001039365.2_ASM103936v2	ftp://ftp.ncbi.nlm.nih.gov/genomes/all/GCA/001/039/365/GCA_001039365.2_ASM103936v2	West_China_Hospital,_Sichuan_University	2017/05/16_00:00	2017/05/16_00:00	2017/05/16_00:00	2017/05/24_00:00	SAMN03771262	assembly	Enterobacter_spp	E_quasiroggenkampii	#N/A	476		NA	absent	absent	blaIMI-1	present
SAMN04572594	Unknown	Homo_sapiens	Bloodstream_infection		Vance_Fowler		GCF_001631265.1	ASM163126v1	Contig	NA	GN04900	LVTV01	4808482	76	121939	1296536	Enterobacter_hormaechei_subsp._xiangfangensis_(enterobacteria)	Enterobacter_hormaechei	ftp://ftp.ncbi.nlm.nih.gov/genomes/all/GCF/001/631/265/GCF_001631265.1_ASM163126v1	ftp://ftp.ncbi.nlm.nih.gov/genomes/all/GCA/001/631/265/GCA_001631265.1_ASM163126v1	JCVI	2016/04/25_00:00	2016/04/25_00:00	2016/04/25_00:00	2018/10/10_00:00	SAMN04572594	assembly	Enterobacter_spp	E_xiangfangensis	3	-		IncFIB_IncFII	absent	absent	-	absent
SAMEA2273451	blood	Homo_sapiens					GCF_900076545.1	12045_5#29	Scaffold	NA	e2346	FKDC01	4808565	63	182554	550	Enterobacter_cloacae_(enterobacteria)	Enterobacter_cloacae	ftp://ftp.ncbi.nlm.nih.gov/genomes/all/GCF/900/076/545/GCF_900076545.1_12045_5_29	ftp://ftp.ncbi.nlm.nih.gov/genomes/all/GCA/900/076/545/GCA_900076545.1_12045_5_29	SC	2016/04/13_00:00	2016/05/09_00:00	2016/05/09_00:00	2016/05/14_00:00	SAMEA2273451	assembly	Enterobacter_spp	E_xiangfangensis	2	286		IncFIB_IncFII	absent	absent	-	absent
SAMN02469365	feces	Tenebrio_molitor					GCF_000478345.1	ASM47834v1	Contig	NA	YZ1	ANIC01	4808813	11	1157430	1260277	Enterobacter_cancerogenus_YZ1_(enterobacteria)	Enterobacter_cancerogenus	ftp://ftp.ncbi.nlm.nih.gov/genomes/all/GCF/000/478/345/GCF_000478345.1_ASM47834v1	ftp://ftp.ncbi.nlm.nih.gov/genomes/all/GCA/000/478/345/GCA_000478345.1_ASM47834v1	BGI_Research_Institution	2012/12/31_00:00	2013/10/22_00:00	2013/10/22_00:00	2013/10/22_00:00	SAMN02469365	assembly	Enterobacter_spp	E_xiangfangensis	1	744		NA	absent	absent	-	present
SAMEA2273412	blood	Homo_sapiens					GCF_900076145.1	11983_6#88	Scaffold	NA	e1770	FKAO01	4809209	48	209217	550	Enterobacter_cloacae_(enterobacteria)	Enterobacter_cloacae	ftp://ftp.ncbi.nlm.nih.gov/genomes/all/GCF/900/076/145/GCF_900076145.1_11983_6_88	ftp://ftp.ncbi.nlm.nih.gov/genomes/all/GCA/900/076/145/GCA_900076145.1_11983_6_88	SC	2016/04/13_00:00	2016/05/09_00:00	2016/05/09_00:00	2016/05/14_00:00	SAMEA2273412	assembly	Enterobacter_spp	E_xiangfangensis	2	104		IncFIB_IncFIC_IncFII	absent	absent	-	absent
SAMN02469366	feces	Zophobas_atratus					GCF_000328885.1	SOAPdenovo	Scaffold	NA	YT3	ANID01	4809358	14	736199	1260282	Enterobacter_hormaechei_YT3_(enterobacteria)	Enterobacter_hormaechei	ftp://ftp.ncbi.nlm.nih.gov/genomes/all/GCF/000/328/885/GCF_000328885.1_SOAPdenovo	ftp://ftp.ncbi.nlm.nih.gov/genomes/all/GCA/000/328/885/GCA_000328885.1_SOAPdenovo	BGI_Research_Institution	2013/01/02_00:00	2013/03/21_00:00	2013/03/21_00:00	2014/10/09_00:00	SAMN02469366	assembly	Enterobacter_spp	E_xiangfangensis	1	744		NA	absent	absent	-	present
SAMN03776151	Long_Beans						GCF_001187305.1	ASM118730v1	Contig	NA	LB3	LFHB01	4810458	48	241841	158836	Enterobacter_hormaechei_(enterobacteria)	Enterobacter_hormaechei	ftp://ftp.ncbi.nlm.nih.gov/genomes/all/GCF/001/187/305/GCF_001187305.1_ASM118730v1	ftp://ftp.ncbi.nlm.nih.gov/genomes/all/GCA/001/187/305/GCA_001187305.1_ASM118730v1	University_of_Malaya	2015/07/24_00:00	2015/07/24_00:00	2015/07/24_00:00	2019/01/07_00:00	SAMN03776151	assembly	Enterobacter_spp	E_xiangfangensis	3	722		NA	absent	absent	-	absent
SAMD00166969							GCF_007035975.1	ASM703597v1	Complete_Genome	NA	18A13	NA	4811855	3	4652325	2565914	Enterobacter_sp._18A13_(enterobacteria)	Enterobacter_sp._18A13	ftp://ftp.ncbi.nlm.nih.gov/genomes/all/GCF/007/035/975/GCF_007035975.1_ASM703597v1	ftp://ftp.ncbi.nlm.nih.gov/genomes/all/GCA/007/035/975/GCA_007035975.1_ASM703597v1	Laboratory_of_Bacterial_Genomics,_Pathogen_Genomics_Center,_National_Institute_of_Infectious_Diseases	2019/05/14_00:00	2019/07/16_00:00	2019/07/16_00:00	2019/07/30_00:00	SAMD00166969	assembly	Enterobacter_spp	E_vonholyi	#N/A	-		NA	absent	present	blaFRI-8	present
SAMN05589724	rhizosphere	not_collected					GCF_002022405.1	ASM202240v1	Scaffold	NA	A3203	MSDM01	4812349	17	792170	299767	Enterobacter_ludwigii_(enterobacteria)	Enterobacter_ludwigii	ftp://ftp.ncbi.nlm.nih.gov/genomes/all/GCF/002/022/405/GCF_002022405.1_ASM202240v1	ftp://ftp.ncbi.nlm.nih.gov/genomes/all/GCA/002/022/405/GCA_002022405.1_ASM202240v1	USDA	2017/03/07_00:00	2017/03/07_00:00	2017/03/07_00:00	2017/03/11_00:00	SAMN05589724	assembly	Enterobacter_spp	E_ludwigii	#N/A	-		NA	absent	absent	-	present
SAMN04252947	Unknown	Homo_sapiens	clinical_or_host-associated_bacteria	11_years	Johann_Pitout		GCF_001473075.1	SMART_1057.v1	Contig	NA	SMART_1057	LPON01	4813841	82	303227	1296536	Enterobacter_hormaechei_subsp._xiangfangensis_(enterobacteria)	Enterobacter_hormaechei	ftp://ftp.ncbi.nlm.nih.gov/genomes/all/GCF/001/473/075/GCF_001473075.1_SMART_1057.v1	ftp://ftp.ncbi.nlm.nih.gov/genomes/all/GCA/001/473/075/GCA_001473075.1_SMART_1057.v1	JCVI	2015/12/21_00:00	2015/12/21_00:00	2015/12/21_00:00	2018/10/10_00:00	SAMN04252947	assembly	Enterobacter_spp	E_xiangfangensis	3	171		IncFIB_IncFII_IncX3	absent	absent	blaNDM-1	absent
SAMEA2273273	blood	Homo_sapiens					GCF_900078125.1	11983_7#49	Scaffold	NA	e967	FKIA01	4813960	53	175242	550	Enterobacter_cloacae_(enterobacteria)	Enterobacter_cloacae	ftp://ftp.ncbi.nlm.nih.gov/genomes/all/GCF/900/078/125/GCF_900078125.1_11983_7_49	ftp://ftp.ncbi.nlm.nih.gov/genomes/all/GCA/900/078/125/GCA_900078125.1_11983_7_49	SC	2016/04/13_00:00	2016/05/09_00:00	2016/05/09_00:00	2016/05/14_00:00	SAMEA2273273	assembly	Enterobacter_spp	E_xiangfangensis	2	78		IncFIB	absent	absent	-	absent
SAMN10525006	ascitic_fluid	Homo_sapiens					GCF_003964345.1	ASM396434v1	Contig	NA	WCHEN090065	RXSM01	4814419	137	134938	1812935	Enterobacter_roggenkampii_(enterobacteria)	Enterobacter_roggenkampii	ftp://ftp.ncbi.nlm.nih.gov/genomes/all/GCF/003/964/345/GCF_003964345.1_ASM396434v1	ftp://ftp.ncbi.nlm.nih.gov/genomes/all/GCA/003/964/345/GCA_003964345.1_ASM396434v1	West_China_Hospital,_Sichuan_University	2018/12/23_00:00	2018/12/23_00:00	2018/12/23_00:00	2018/12/28_00:00	SAMN10525006	assembly	Enterobacter_spp	E_roggenkampii	#N/A	515		FIA_IncFIA	absent	present	-	present
SAMEA2273275	blood	Homo_sapiens					GCF_900078135.1	11983_7#51	Scaffold	NA	e970	FKHZ01	4814922	56	159803	550	Enterobacter_cloacae_(enterobacteria)	Enterobacter_cloacae	ftp://ftp.ncbi.nlm.nih.gov/genomes/all/GCF/900/078/135/GCF_900078135.1_11983_7_51	ftp://ftp.ncbi.nlm.nih.gov/genomes/all/GCA/900/078/135/GCA_900078135.1_11983_7_51	SC	2016/04/13_00:00	2016/05/09_00:00	2016/05/09_00:00	2016/05/14_00:00	SAMEA2273275	assembly	Enterobacter_spp	E_xiangfangensis	2	78		IncFIB	absent	absent	-	absent
SAMN10835775	missing	Homo_sapiens					GCF_004523845.1	ASM452384v1	Contig	NA	ENM-22	SOPM01	4815217	113	146197	158836	Enterobacter_hormaechei_(enterobacteria)	Enterobacter_hormaechei	ftp://ftp.ncbi.nlm.nih.gov/genomes/all/GCF/004/523/845/GCF_004523845.1_ASM452384v1	ftp://ftp.ncbi.nlm.nih.gov/genomes/all/GCA/004/523/845/GCA_004523845.1_ASM452384v1	Enterobacter_Cloacae_ENM-22	2019/03/29_00:00	2019/03/29_00:00	2019/03/29_00:00	2019/04/01_00:00	SAMN10835775	assembly	Enterobacter_spp	E_xiangfangensis	1	80		ColKP3_IncX3_IncX4	absent	absent	-	present
SAMN04219575	missing	Scrippsiella_trochoidea			Jin_Zhou		GCF_001469415.1	ASM146941v1	Scaffold	NA	ST3	LMBL01	4815521	75	127987	158836	Enterobacter_hormaechei_(enterobacteria)	Enterobacter_hormaechei	ftp://ftp.ncbi.nlm.nih.gov/genomes/all/GCF/001/469/415/GCF_001469415.1_ASM146941v1	ftp://ftp.ncbi.nlm.nih.gov/genomes/all/GCA/001/469/415/GCA_001469415.1_ASM146941v1	Graduate_School_at_Shenzhen,_Tsinghua_University	2015/12/18_00:00	2015/12/18_00:00	2015/12/18_00:00	2019/01/07_00:00	SAMN04219575	assembly	Enterobacter_spp	E_xiangfangensis	1	346		NA	absent	absent	-	present
SAMN04407794	Unknown	Homo_sapiens	Bloodstream_infection		Vance_Fowler		GCF_001518455.1	ASM151845v1	Contig	NA	GN05753	LRCX01	4816235	199	43260	1812935	Enterobacter_roggenkampii_(enterobacteria)	Enterobacter_roggenkampii	ftp://ftp.ncbi.nlm.nih.gov/genomes/all/GCF/001/518/455/GCF_001518455.1_ASM151845v1	ftp://ftp.ncbi.nlm.nih.gov/genomes/all/GCA/001/518/455/GCA_001518455.1_ASM151845v1	JCVI	2016/01/19_00:00	2016/01/19_00:00	2016/01/19_00:00	2016/07/19_00:00	SAMN04407794	assembly	Enterobacter_spp	E_roggenkampii	#N/A	997		IncFIB_IncFII_IncX5	absent	present	-	present
SAMEA2273309	blood	Homo_sapiens					GCF_900075035.1	11983_7#85	Scaffold	NA	e1219	FJXD01	4816242	72	200155	550	Enterobacter_cloacae_(enterobacteria)	Enterobacter_cloacae	ftp://ftp.ncbi.nlm.nih.gov/genomes/all/GCF/900/075/035/GCF_900075035.1_11983_7_85	ftp://ftp.ncbi.nlm.nih.gov/genomes/all/GCA/900/075/035/GCA_900075035.1_11983_7_85	SC	2016/04/05_00:00	2016/04/06_00:00	2016/04/06_00:00	2016/04/12_00:00	SAMEA2273309	assembly	Enterobacter_spp	E_xiangfangensis	2	135		NA	present	absent	-	absent
SAMN12124847		Pellaea_calomelanos					GCF_006517595.2	ASM651759v2	Scaffold	NA	MHSD6	VHQJ02	4817102	106	403061	2591007	Enterobacter_sp._MHSD6_(enterobacteria)	Enterobacter_sp._MHSD6	ftp://ftp.ncbi.nlm.nih.gov/genomes/all/GCF/006/517/595/GCF_006517595.2_ASM651759v2	ftp://ftp.ncbi.nlm.nih.gov/genomes/all/GCA/006/517/595/GCA_006517595.2_ASM651759v2	University_of_Johannesburg	2019/07/30_00:00	2019/07/30_00:00	2019/07/30_00:00	2019/08/06_00:00	SAMN12124847	assembly	Enterobacter_spp	E_xiangfangensis	1	45		IncFIB_IncFII	absent	absent	-	present
SAMN09845203		Homo_sapiens					GCF_003964635.1	ASM396463v1	Contig	NA	WCHEH090026	RXRI01	4817900	62	234487	158836	Enterobacter_hormaechei_(enterobacteria)	Enterobacter_hormaechei	ftp://ftp.ncbi.nlm.nih.gov/genomes/all/GCF/003/964/635/GCF_003964635.1_ASM396463v1	ftp://ftp.ncbi.nlm.nih.gov/genomes/all/GCA/003/964/635/GCA_003964635.1_ASM396463v1	West_China_Hospital,_Sichuan_University	2018/12/23_00:00	2018/12/23_00:00	2018/12/23_00:00	2018/12/28_00:00	SAMN09845203	assembly	Enterobacter_spp	E_xiangfangensis	1	50		NA	absent	absent	-	present
SAMN04124432	urine	Homo_sapiens	Unitary_tract_infection		Anette_M._Hammerum		GCF_001482465.1	ASM148246v1	Contig	NA	AMA_497	LLJM01	4818362	66	246333	61645	Enterobacter_asburiae_(enterobacteria)	Enterobacter_asburiae	ftp://ftp.ncbi.nlm.nih.gov/genomes/all/GCF/001/482/465/GCF_001482465.1_ASM148246v1	ftp://ftp.ncbi.nlm.nih.gov/genomes/all/GCA/001/482/465/GCA_001482465.1_ASM148246v1	Anette_M._Hammerum	2015/12/24_00:00	2015/12/24_00:00	2015/12/24_00:00	2015/12/31_00:00	SAMN04124432	assembly	Enterobacter_spp	E_asburiae	#N/A	-		IncHI2_IncHI2A	present	absent	-	present
SAMEA2273442	blood	Homo_sapiens					GCF_900076445.1	12045_5#20	Scaffold	NA	e2140	FKCX01	4819206	69	190058	550	Enterobacter_cloacae_(enterobacteria)	Enterobacter_cloacae	ftp://ftp.ncbi.nlm.nih.gov/genomes/all/GCF/900/076/445/GCF_900076445.1_12045_5_20	ftp://ftp.ncbi.nlm.nih.gov/genomes/all/GCA/900/076/445/GCA_900076445.1_12045_5_20	SC	2016/04/13_00:00	2016/05/09_00:00	2016/05/09_00:00	2016/05/14_00:00	SAMEA2273442	assembly	Enterobacter_spp	E_xiangfangensis	1	802		NA	absent	absent	-	present
SAMN04124433	urine	Homo_sapiens	Urinary_tract_infection		Anette_M._Hammerum		GCF_001482625.1	ASM148262v1	Scaffold	NA	AMA_590	LLJN01	4819287	67	206594	61645	Enterobacter_asburiae_(enterobacteria)	Enterobacter_asburiae	ftp://ftp.ncbi.nlm.nih.gov/genomes/all/GCF/001/482/625/GCF_001482625.1_ASM148262v1	ftp://ftp.ncbi.nlm.nih.gov/genomes/all/GCA/001/482/625/GCA_001482625.1_ASM148262v1	Anette_M._Hammerum	2015/12/24_00:00	2015/12/24_00:00	2015/12/24_00:00	2015/12/31_00:00	SAMN04124433	assembly	Enterobacter_spp	E_asburiae	#N/A	-		IncHI2_IncHI2A	present	absent	-	present
SAMEA2273346	blood	Homo_sapiens					GCF_900075655.1	11983_6#25	Scaffold	NA	e1387	FJYP01	4819496	73	123674	550	Enterobacter_cloacae_(enterobacteria)	Enterobacter_cloacae	ftp://ftp.ncbi.nlm.nih.gov/genomes/all/GCF/900/075/655/GCF_900075655.1_11983_6_25	ftp://ftp.ncbi.nlm.nih.gov/genomes/all/GCA/900/075/655/GCA_900075655.1_11983_6_25	SC	2016/04/05_00:00	2016/04/06_00:00	2016/04/06_00:00	2016/04/18_00:00	SAMEA2273346	assembly	Enterobacter_spp	E_xiangfangensis	2	278		IncHI2_IncHI2A	present	absent	-	absent
SAMEA2709019	not_available:_to_be_reported_later	not_available				not_available:_to_be_reported_later	GCF_900447525.1	32407_G01	Contig	NA	NCTC11588	UGIV01	4819580	2	4781837	550	Enterobacter_cloacae_(enterobacteria)	Enterobacter_cloacae	ftp://ftp.ncbi.nlm.nih.gov/genomes/all/GCF/900/447/525/GCF_900447525.1_32407_G01	ftp://ftp.ncbi.nlm.nih.gov/genomes/all/GCA/900/447/525/GCA_900447525.1_32407_G01	SC	2018/08/01_00:00	2018/08/02_00:00	2018/08/02_00:00	2018/08/04_00:00	SAMEA2709019	assembly	Enterobacter_spp	E_xiangfangensis	1	134		NA	absent	absent	-	present
SAMD00019157		Homo_sapiens					GCF_002897075.1	ASM289707v1	Contig	NA	KINAN-G	BBKD01	4819796	415	23890	1535203	Enterobacter_sp._KINAN-G_(enterobacteria)	Enterobacter_sp._KINAN-G	ftp://ftp.ncbi.nlm.nih.gov/genomes/all/GCF/002/897/075/GCF_002897075.1_ASM289707v1	ftp://ftp.ncbi.nlm.nih.gov/genomes/all/GCA/002/897/075/GCA_002897075.1_ASM289707v1	Laboratory_of_Bacterial_Genomics,_Pathogen_Genomic_Center,_National_Institute_of_Infectious_Diseases	2017/12/20_00:00	2018/01/24_00:00	2018/01/24_00:00	2018/01/26_00:00	SAMD00019157	assembly	Enterobacter_spp	E_roggenkampii	#N/A	963		IncFIB_IncFII_IncR	absent	absent	-	present
SAMN07167863	lake_water				Mohapatra_et_al		GCF_002528975.1	ASM252897v1	Contig	NA	DL4.3	NMPX01	4820048	145	122602	550	Enterobacter_cloacae_(enterobacteria)	Enterobacter_cloacae	ftp://ftp.ncbi.nlm.nih.gov/genomes/all/GCF/002/528/975/GCF_002528975.1_ASM252897v1	ftp://ftp.ncbi.nlm.nih.gov/genomes/all/GCA/002/528/975/GCA_002528975.1_ASM252897v1	National_Institute_of_Science_Education_and_Research	2017/10/11_00:00	2017/10/11_00:00	2017/10/11_00:00	2017/10/16_00:00	SAMN07167863	assembly	Enterobacter_spp	E_cloacae	#N/A	-		NA	absent	absent	-	present
SAMEA2273185	blood	Homo_sapiens					GCF_900077315.1	12045_4#57	Scaffold	NA	e534	FKER01	4820568	70	192854	550	Enterobacter_cloacae_(enterobacteria)	Enterobacter_cloacae	ftp://ftp.ncbi.nlm.nih.gov/genomes/all/GCF/900/077/315/GCF_900077315.1_12045_4_57	ftp://ftp.ncbi.nlm.nih.gov/genomes/all/GCA/900/077/315/GCA_900077315.1_12045_4_57	SC	2016/04/13_00:00	2016/05/09_00:00	2016/05/09_00:00	2016/05/14_00:00	SAMEA2273185	assembly	Enterobacter_spp	E_xiangfangensis	4	68		IncR_pENTAS02	absent	absent	-	absent
SAMEA2273331	blood	Homo_sapiens					GCF_900075485.1	11983_6#11	Scaffold	NA	e1323	FJXZ01	4820647	37	215476	550	Enterobacter_cloacae_(enterobacteria)	Enterobacter_cloacae	ftp://ftp.ncbi.nlm.nih.gov/genomes/all/GCF/900/075/485/GCF_900075485.1_11983_6_11	ftp://ftp.ncbi.nlm.nih.gov/genomes/all/GCA/900/075/485/GCA_900075485.1_11983_6_11	SC	2016/04/04_00:00	2016/04/06_00:00	2016/04/06_00:00	2016/04/08_00:00	SAMEA2273331	assembly	Enterobacter_spp	E_cloacae	#N/A	789		NA	absent	absent	-	present
SAMEA2612494	not_available:_to_be_reported_later	not_available				not_available:_to_be_reported_later	GCA_900447185.1	28869_G01	Contig	NA	NCTC12123	UFYI01	4820825	8	4722215	61645	Enterobacter_asburiae_(enterobacteria)	Enterobacter_asburiae	NA	ftp://ftp.ncbi.nlm.nih.gov/genomes/all/GCA/900/447/185/GCA_900447185.1_28869_G01	SC	2018/08/01_00:00	2018/08/02_00:00	2018/08/02_00:00	2018/08/02_00:00	SAMEA2612494	assembly	Enterobacter_spp	E_asburiae	#N/A	807		NA	absent	absent	-	absent
SAMN05960959	blood	Homo_sapiens	Sepsis		Stephen_Obaro		GCF_002239945.1	ASM223994v1	Contig	NA	HB_Z_2180	NJCO01	4821786	78	240372	299766	Enterobacter_hormaechei_subsp._steigerwaltii_(enterobacteria)	Enterobacter_hormaechei	ftp://ftp.ncbi.nlm.nih.gov/genomes/all/GCF/002/239/945/GCF_002239945.1_ASM223994v1	ftp://ftp.ncbi.nlm.nih.gov/genomes/all/GCA/002/239/945/GCA_002239945.1_ASM223994v1	JCVI	2017/08/02_00:00	2017/08/02_00:00	2017/08/02_00:00	2017/08/04_00:00	SAMN05960959	assembly	Enterobacter_spp	E_xiangfangensis	1	124		NA	absent	absent	-	present
SAMN09845191		Homo_sapiens					GCF_003965675.1	ASM396567v1	Contig	NA	WCHEH090013	RXQW01	4821959	93	173938	158836	Enterobacter_hormaechei_(enterobacteria)	Enterobacter_hormaechei	ftp://ftp.ncbi.nlm.nih.gov/genomes/all/GCF/003/965/675/GCF_003965675.1_ASM396567v1	ftp://ftp.ncbi.nlm.nih.gov/genomes/all/GCA/003/965/675/GCA_003965675.1_ASM396567v1	West_China_Hospital,_Sichuan_University	2018/12/23_00:00	2018/12/23_00:00	2018/12/23_00:00	2018/12/28_00:00	SAMN09845191	assembly	Enterobacter_spp	E_xiangfangensis	3	418		IncFIB_IncFII_IncR_IncX3	absent	absent	blaNDM-5	absent
SAMN07503715	pus	Homo_sapiens	suppuration	30	Centre_Hospitalier_Sylvanus_Olympio		GCF_002751815.1	ASM275181v1	Contig	NA	ECLO_616294_SO	NRJJ01	4822414	369	40633	1296536	Enterobacter_hormaechei_subsp._xiangfangensis_(enterobacteria)	Enterobacter_hormaechei	ftp://ftp.ncbi.nlm.nih.gov/genomes/all/GCF/002/751/815/GCF_002751815.1_ASM275181v1	ftp://ftp.ncbi.nlm.nih.gov/genomes/all/GCA/002/751/815/GCA_002751815.1_ASM275181v1	Universite_de_Lome	2017/11/03_00:00	2017/11/06_00:00	2017/11/06_00:00	2017/11/09_00:00	SAMN07503715	assembly	Enterobacter_spp	E_xiangfangensis	3	182		IncFIB_IncFII_IncX3	absent	absent	blaNDM-5	absent
SAMN10525002	blood	Homo_sapiens					GCF_003964365.1	ASM396436v1	Contig	NA	WCHEN090037	RXSI01	4822753	65	208747	1812935	Enterobacter_roggenkampii_(enterobacteria)	Enterobacter_roggenkampii	ftp://ftp.ncbi.nlm.nih.gov/genomes/all/GCF/003/964/365/GCF_003964365.1_ASM396436v1	ftp://ftp.ncbi.nlm.nih.gov/genomes/all/GCA/003/964/365/GCA_003964365.1_ASM396436v1	West_China_Hospital,_Sichuan_University	2018/12/23_00:00	2018/12/23_00:00	2018/12/23_00:00	2018/12/28_00:00	SAMN10525002	assembly	Enterobacter_spp	E_roggenkampii	#N/A	984		NA	absent	absent	-	present
SAMEA2273161	blood	Homo_sapiens					GCF_900077065.1	12045_4#39	Scaffold	NA	e400	FKDX01	4823519	77	137772	550	Enterobacter_cloacae_(enterobacteria)	Enterobacter_cloacae	ftp://ftp.ncbi.nlm.nih.gov/genomes/all/GCF/900/077/065/GCF_900077065.1_12045_4_39	ftp://ftp.ncbi.nlm.nih.gov/genomes/all/GCA/900/077/065/GCA_900077065.1_12045_4_39	SC	2016/04/13_00:00	2016/05/09_00:00	2016/05/09_00:00	2016/05/14_00:00	SAMEA2273161	assembly	Enterobacter_spp	E_xiangfangensis	2	278		IncHI2_IncHI2A	present	absent	-	absent
SAMN05526267	Decaying_Wood						GCF_001742765.1	ASM174276v1	Contig	NA	ku-bf2	MDVW01	4823897	24	495329	1888167	Enterobacter_sp._ku-bf2_(enterobacteria)	Enterobacter_sp._ku-bf2	ftp://ftp.ncbi.nlm.nih.gov/genomes/all/GCF/001/742/765/GCF_001742765.1_ASM174276v1	ftp://ftp.ncbi.nlm.nih.gov/genomes/all/GCA/001/742/765/GCA_001742765.1_ASM174276v1	osmania_University	2016/09/23_00:00	2016/09/23_00:00	2016/09/23_00:00	2016/09/25_00:00	SAMN05526267	assembly	Enterobacter_spp	E_quasiroggenkampii	#N/A	-		NA	absent	absent	-	present
SAMEA2273461	blood	Homo_sapiens					GCF_900076665.1	12045_5#40	Scaffold	NA	e2549	FKCS01	4824261	79	143568	550	Enterobacter_cloacae_(enterobacteria)	Enterobacter_cloacae	ftp://ftp.ncbi.nlm.nih.gov/genomes/all/GCF/900/076/665/GCF_900076665.1_12045_5_40	ftp://ftp.ncbi.nlm.nih.gov/genomes/all/GCA/900/076/665/GCA_900076665.1_12045_5_40	SC	2016/04/13_00:00	2016/05/09_00:00	2016/05/09_00:00	2016/05/14_00:00	SAMEA2273461	assembly	Enterobacter_spp	E_xiangfangensis	2	78		IncFIB	absent	absent	-	absent
SAMN03197595	missing	Homo_sapiens	missing		UW_clinical_laboratory		GCF_001056585.1	ASM105658v1	Scaffold	NA	405_ECLO	JVIL01	4824940	95	115390	550	Enterobacter_cloacae_(enterobacteria)	Enterobacter_cloacae	ftp://ftp.ncbi.nlm.nih.gov/genomes/all/GCF/001/056/585/GCF_001056585.1_ASM105658v1	ftp://ftp.ncbi.nlm.nih.gov/genomes/all/GCA/001/056/585/GCA_001056585.1_ASM105658v1	University_of_Washington	2015/07/10_00:00	2015/07/10_00:00	2015/07/10_00:00	2015/07/19_00:00	SAMN03197595	assembly	Enterobacter_spp	E_chengduensis	#N/A	-		IncR	absent	absent	-	present
SAMN04407789	Unknown	Homo_sapiens	Bloodstream_infection		Vance_Fowler		GCF_001518325.1	ASM151832v1	Contig	NA	GN04366	LRCS01	4825258	133	61751	1296536	Enterobacter_hormaechei_subsp._xiangfangensis_(enterobacteria)	Enterobacter_hormaechei	ftp://ftp.ncbi.nlm.nih.gov/genomes/all/GCF/001/518/325/GCF_001518325.1_ASM151832v1	ftp://ftp.ncbi.nlm.nih.gov/genomes/all/GCA/001/518/325/GCA_001518325.1_ASM151832v1	JCVI	2016/01/19_00:00	2016/01/19_00:00	2016/01/19_00:00	2018/10/10_00:00	SAMN04407789	assembly	Enterobacter_spp	E_xiangfangensis	3	127		NA	absent	absent	-	absent
SAMN04521933	missing	Homo_sapiens	missing	missing	Massachusetts_General_Hospital	missing	GCF_002151965.1	ASM215196v1	Scaffold	NA	MGH184	NGRQ01	4825632	40	290786	158836	Enterobacter_hormaechei_(enterobacteria)	Enterobacter_hormaechei	ftp://ftp.ncbi.nlm.nih.gov/genomes/all/GCF/002/151/965/GCF_002151965.1_ASM215196v1	ftp://ftp.ncbi.nlm.nih.gov/genomes/all/GCA/002/151/965/GCA_002151965.1_ASM215196v1	Broad_Institute	2017/05/19_00:00	2017/05/19_00:00	2017/05/19_00:00	2018/11/14_00:00	SAMN04521933	assembly	Enterobacter_spp	E_xiangfangensis	1	-		NA	absent	absent	-	present
SAMEA2273462	blood	Homo_sapiens					GCF_900076685.1	12045_5#41	Scaffold	NA	e2550	FKDL01	4827631	59	143674	550	Enterobacter_cloacae_(enterobacteria)	Enterobacter_cloacae	ftp://ftp.ncbi.nlm.nih.gov/genomes/all/GCF/900/076/685/GCF_900076685.1_12045_5_41	ftp://ftp.ncbi.nlm.nih.gov/genomes/all/GCA/900/076/685/GCA_900076685.1_12045_5_41	SC	2016/04/13_00:00	2016/05/09_00:00	2016/05/09_00:00	2016/05/14_00:00	SAMEA2273462	assembly	Enterobacter_spp	E_xiangfangensis	2	78		IncFIB	absent	absent	-	absent
SAMN10525008	urine	Homo_sapiens					GCF_003964355.1	ASM396435v1	Contig	NA	WCHEX090068	RXSO01	4827673	152	148202	1296536	Enterobacter_hormaechei_subsp._xiangfangensis_(enterobacteria)	Enterobacter_hormaechei	ftp://ftp.ncbi.nlm.nih.gov/genomes/all/GCF/003/964/355/GCF_003964355.1_ASM396435v1	ftp://ftp.ncbi.nlm.nih.gov/genomes/all/GCA/003/964/355/GCA_003964355.1_ASM396435v1	West_China_Hospital,_Sichuan_University	2018/12/23_00:00	2018/12/23_00:00	2018/12/23_00:00	2018/12/28_00:00	SAMN10525008	assembly	Enterobacter_spp	E_xiangfangensis	3	171		IncFIB_IncFII_IncR_IncX3	absent	absent	blaNDM-1	absent
SAMN09435818	unknown	Homo_sapiens	Not_available		French_National_Reference_Center_for_Antibiotic_Resistance		GCF_003289345.1	ASM328934v1	Scaffold	NA	105H6	QMCY01	4828083	121	176383	299766	Enterobacter_hormaechei_subsp._steigerwaltii_(enterobacteria)	Enterobacter_hormaechei	ftp://ftp.ncbi.nlm.nih.gov/genomes/all/GCF/003/289/345/GCF_003289345.1_ASM328934v1	ftp://ftp.ncbi.nlm.nih.gov/genomes/all/GCA/003/289/345/GCA_003289345.1_ASM328934v1	CHU_de_Bicetre	2018/07/06_00:00	2018/07/06_00:00	2018/07/06_00:00	2018/07/11_00:00	SAMN09435818	assembly	Enterobacter_spp	E_xiangfangensis	1	110		IncFIB_IncFII	absent	absent	-	present
SAMN04572686	Unknown	Homo_sapiens	Bloodstream_infection		Vance_Fowler		GCF_001631505.1	ASM163150v1	Contig	NA	GN05643	LVUJ01	4828977	182	44354	299766	Enterobacter_hormaechei_subsp._steigerwaltii_(enterobacteria)	Enterobacter_hormaechei	ftp://ftp.ncbi.nlm.nih.gov/genomes/all/GCF/001/631/505/GCF_001631505.1_ASM163150v1	ftp://ftp.ncbi.nlm.nih.gov/genomes/all/GCA/001/631/505/GCA_001631505.1_ASM163150v1	JCVI	2016/04/25_00:00	2016/04/25_00:00	2016/04/25_00:00	2016/04/26_00:00	SAMN04572686	assembly	Enterobacter_spp	E_xiangfangensis	1	461		NA	absent	absent	-	present
SAMEA2273194	blood	Homo_sapiens					GCF_900077395.1	12045_4#66	Scaffold	NA	e590	FKFB01	4829673	55	240330	550	Enterobacter_cloacae_(enterobacteria)	Enterobacter_cloacae	ftp://ftp.ncbi.nlm.nih.gov/genomes/all/GCF/900/077/395/GCF_900077395.1_12045_4_66	ftp://ftp.ncbi.nlm.nih.gov/genomes/all/GCA/900/077/395/GCA_900077395.1_12045_4_66	SC	2016/04/13_00:00	2016/05/09_00:00	2016/05/09_00:00	2016/05/14_00:00	SAMEA2273194	assembly	Enterobacter_spp	E_xiangfangensis	3	120		FIA_IncFIA_IncFIB	absent	absent	-	absent
SAMN03283630	Unknown	Unknown	Unknown		Barry_Kreiswirth		GCF_000957655.1	ASM95765v1	Contig	NA	34999	LAAE01	4829747	80	169143	299766	Enterobacter_hormaechei_subsp._steigerwaltii_(enterobacteria)	Enterobacter_hormaechei	ftp://ftp.ncbi.nlm.nih.gov/genomes/all/GCF/000/957/655/GCF_000957655.1_ASM95765v1	ftp://ftp.ncbi.nlm.nih.gov/genomes/all/GCA/000/957/655/GCA_000957655.1_ASM95765v1	JCVI	2015/03/19_00:00	2015/03/19_00:00	2015/03/19_00:00	2016/06/23_00:00	SAMN03283630	assembly	Enterobacter_spp	E_xiangfangensis	1	134		NA	absent	absent	-	present
SAMEA2273297	blood	Homo_sapiens					GCF_900075255.1	11983_7#73	Scaffold	NA	e1154	FJWH01	4829765	79	178212	550	Enterobacter_cloacae_(enterobacteria)	Enterobacter_cloacae	ftp://ftp.ncbi.nlm.nih.gov/genomes/all/GCF/900/075/255/GCF_900075255.1_11983_7_73	ftp://ftp.ncbi.nlm.nih.gov/genomes/all/GCA/900/075/255/GCA_900075255.1_11983_7_73	SC	2016/04/05_00:00	2016/04/06_00:00	2016/04/06_00:00	2016/04/12_00:00	SAMEA2273297	assembly	Enterobacter_spp	E_xiangfangensis	4	786		IncFIB_IncFII	absent	absent	-	absent
SAMN04252898	Unknown	Homo_sapiens	clinical_or_host-associated_bacteria	74_years	Johann_Pitout		GCF_001472085.1	SMART_309.v1	Contig	NA	SMART_309	LPQK01	4830638	58	359849	1812934	Enterobacter_hormaechei_subsp._hoffmannii_(enterobacteria)	Enterobacter_hormaechei	ftp://ftp.ncbi.nlm.nih.gov/genomes/all/GCF/001/472/085/GCF_001472085.1_SMART_309.v1	ftp://ftp.ncbi.nlm.nih.gov/genomes/all/GCA/001/472/085/GCA_001472085.1_SMART_309.v1	JCVI	2015/12/21_00:00	2015/12/21_00:00	2015/12/21_00:00	2015/12/24_00:00	SAMN04252898	assembly	Enterobacter_spp	E_xiangfangensis	2	78		IncFIB_IncN	absent	absent	blaVIM-1	absent
SAMN08623782	bloodstream	Homo_sapiens	bacterial_infectious_disease		Stanford_Healthcare_Clinical_Microbiology_Laboratory		GCF_003401515.1	ASM340151v1	Contig	NA	CRE06	PXLQ01	4831039	377	199285	158836	Enterobacter_hormaechei_(enterobacteria)	Enterobacter_hormaechei	ftp://ftp.ncbi.nlm.nih.gov/genomes/all/GCF/003/401/515/GCF_003401515.1_ASM340151v1	ftp://ftp.ncbi.nlm.nih.gov/genomes/all/GCA/003/401/515/GCA_003401515.1_ASM340151v1	Stanford_Healthcare	2018/08/16_00:00	2018/08/16_00:00	2018/08/16_00:00	2018/08/21_00:00	SAMN08623782	assembly	Enterobacter_spp	E_xiangfangensis	4	68		NA	absent	absent	-	absent
SAMEA2273135	blood	Homo_sapiens					GCF_900076675.1	12045_4#15	Scaffold	NA	e261	FKDE01	4832136	80	146321	550	Enterobacter_cloacae_(enterobacteria)	Enterobacter_cloacae	ftp://ftp.ncbi.nlm.nih.gov/genomes/all/GCF/900/076/675/GCF_900076675.1_12045_4_15	ftp://ftp.ncbi.nlm.nih.gov/genomes/all/GCA/900/076/675/GCA_900076675.1_12045_4_15	SC	2016/04/13_00:00	2016/05/09_00:00	2016/05/09_00:00	2016/05/14_00:00	SAMEA2273135	assembly	Enterobacter_spp	E_xiangfangensis	2	286		IncFIB_IncFII_pENTAS02	absent	absent	-	absent
SAMN02212350	Water_Sample						GCF_000422225.1	E_cloacae_Hanford_v1.0	Contig	NA	Hanford	ATCK01	4832153	62	640760	299767	Enterobacter_ludwigii_(enterobacteria)	Enterobacter_ludwigii	ftp://ftp.ncbi.nlm.nih.gov/genomes/all/GCF/000/422/225/GCF_000422225.1_E_cloacae_Hanford_v1.0	ftp://ftp.ncbi.nlm.nih.gov/genomes/all/GCA/000/422/225/GCA_000422225.1_E_cloacae_Hanford_v1.0	Oak_Ridge_National_Lab	2013/07/11_00:00	2013/07/11_00:00	2013/07/11_00:00	2019/01/07_00:00	SAMN02212350	assembly	Enterobacter_spp	E_ludwigii	#N/A	253		NA	absent	absent	-	present
SAMN09845221		Homo_sapiens					GCF_003964555.1	ASM396455v1	Contig	NA	WCHEH090056	RXRZ01	4832360	97	160906	158836	Enterobacter_hormaechei_(enterobacteria)	Enterobacter_hormaechei	ftp://ftp.ncbi.nlm.nih.gov/genomes/all/GCF/003/964/555/GCF_003964555.1_ASM396455v1	ftp://ftp.ncbi.nlm.nih.gov/genomes/all/GCA/003/964/555/GCA_003964555.1_ASM396455v1	West_China_Hospital,_Sichuan_University	2018/12/23_00:00	2018/12/23_00:00	2018/12/23_00:00	2018/12/28_00:00	SAMN09845221	assembly	Enterobacter_spp	E_xiangfangensis	2	568		IncFIB_IncFII	absent	absent	-	absent
SAMN08450112	clinical_material	Homo_sapiens	Colonization/infection		University_Hospital_in_Pilsen		GCF_003057395.1	ASM305739v1	Contig	NA	Encl-44578	QBPF01	4832725	87	155566	2027919	Enterobacter_cloacae_complex_sp._(enterobacteria)	Enterobacter_cloacae_complex_sp.	ftp://ftp.ncbi.nlm.nih.gov/genomes/all/GCF/003/057/395/GCF_003057395.1_ASM305739v1	ftp://ftp.ncbi.nlm.nih.gov/genomes/all/GCA/003/057/395/GCA_003057395.1_ASM305739v1	Veterinary_Research_Institute	2018/04/18_00:00	2018/04/18_00:00	2018/04/18_00:00	2018/04/25_00:00	SAMN08450112	assembly	Enterobacter_spp	E_xiangfangensis	3	182		IncFIB_IncFII_IncX3	absent	absent	blaNDM-4	absent
SAMN04407791	Unknown	Homo_sapiens	Bloodstream_infection		Vance_Fowler		GCF_001518275.1	ASM151827v1	Contig	NA	GN04381	LRCU01	4834481	156	54300	1296536	Enterobacter_hormaechei_subsp._xiangfangensis_(enterobacteria)	Enterobacter_hormaechei	ftp://ftp.ncbi.nlm.nih.gov/genomes/all/GCF/001/518/275/GCF_001518275.1_ASM151827v1	ftp://ftp.ncbi.nlm.nih.gov/genomes/all/GCA/001/518/275/GCA_001518275.1_ASM151827v1	JCVI	2016/01/19_00:00	2016/01/19_00:00	2016/01/19_00:00	2018/10/10_00:00	SAMN04407791	assembly	Enterobacter_spp	E_xiangfangensis	3	-		IncFIB	absent	absent	-	absent
SAMN03197103	missing	Homo_sapiens	missing		UW_clinical_laboratory		GCF_001052225.1	ASM105222v1	Scaffold	NA	1147_ECLO	JWBJ01	4835058	312	47347	158836	Enterobacter_hormaechei_(enterobacteria)	Enterobacter_hormaechei	ftp://ftp.ncbi.nlm.nih.gov/genomes/all/GCF/001/052/225/GCF_001052225.1_ASM105222v1	ftp://ftp.ncbi.nlm.nih.gov/genomes/all/GCA/001/052/225/GCA_001052225.1_ASM105222v1	University_of_Washington	2015/07/10_00:00	2015/07/10_00:00	2015/07/10_00:00	2019/01/07_00:00	SAMN03197103	assembly	Enterobacter_spp	E_xiangfangensis	3	264		IncFIB_IncFII	absent	absent	-	absent
SAMN09845207		Homo_sapiens					GCF_003965195.1	ASM396519v1	Contig	NA	WCHEH090030	RXRL01	4836187	83	147640	158836	Enterobacter_hormaechei_(enterobacteria)	Enterobacter_hormaechei	ftp://ftp.ncbi.nlm.nih.gov/genomes/all/GCF/003/965/195/GCF_003965195.1_ASM396519v1	ftp://ftp.ncbi.nlm.nih.gov/genomes/all/GCA/003/965/195/GCA_003965195.1_ASM396519v1	West_China_Hospital,_Sichuan_University	2018/12/23_00:00	2018/12/23_00:00	2018/12/23_00:00	2018/12/28_00:00	SAMN09845207	assembly	Enterobacter_spp	E_xiangfangensis	2	78		IncFIB_IncFII	absent	absent	-	absent
SAMN03732688	bodily_fluid	Homo_sapiens			Vance_Fowler		GCF_001023245.1	ASM102324v1	Contig	NA	GN02226	LEEO01	4836923	36	276882	299767	Enterobacter_ludwigii_(enterobacteria)	Enterobacter_ludwigii	ftp://ftp.ncbi.nlm.nih.gov/genomes/all/GCF/001/023/245/GCF_001023245.1_ASM102324v1	ftp://ftp.ncbi.nlm.nih.gov/genomes/all/GCA/001/023/245/GCA_001023245.1_ASM102324v1	JCVI	2015/06/09_00:00	2015/06/09_00:00	2015/06/09_00:00	2016/07/07_00:00	SAMN03732688	assembly	Enterobacter_spp	E_ludwigii	#N/A	692		IncFIB_IncFII	absent	absent	-	present
SAMEA104567668	faecal	Homo_sapiens					GCA_902161535.1	25426_7#289	Scaffold	NA	4928STDY7071562	CABGRY01	4837988	50	213618	550	Enterobacter_cloacae_(enterobacteria)	Enterobacter_cloacae	NA	ftp://ftp.ncbi.nlm.nih.gov/genomes/all/GCA/902/161/535/GCA_902161535.1_25426_7_289	SC	2019/07/08_00:00	2019/07/12_00:00	2019/07/12_00:00	2019/07/12_00:00	SAMEA104567668	assembly	Enterobacter_spp	E_bugandensis	#N/A	-		rep6	absent	absent	-	present
SAMN10847450	patient	Homo_sapiens	not_specified		CHU-Bicetre		GCF_004145885.1	ASM414588v1	Scaffold	NA	ICR003004	SEJE01	4838388	189	78572	158836	Enterobacter_hormaechei_(enterobacteria)	Enterobacter_hormaechei	ftp://ftp.ncbi.nlm.nih.gov/genomes/all/GCF/004/145/885/GCF_004145885.1_ASM414588v1	ftp://ftp.ncbi.nlm.nih.gov/genomes/all/GCA/004/145/885/GCA_004145885.1_ASM414588v1	Universite_Paris_Sud	2019/02/06_00:00	2019/02/07_00:00	2019/02/07_00:00	2019/02/16_00:00	SAMN10847450	assembly	Enterobacter_spp	E_xiangfangensis	2	78		Col_IncFIB_IncFII	absent	absent	-	absent
SAMN02138657	missing	missing					GCF_000534415.1	Ente_cloa_complex_BIDMC_27_V1	Scaffold	NA	BIDMC_27	JCLD01	4838734	9	1300013	1329839	Enterobacter_sp._BIDMC_27_(enterobacteria)	Enterobacter_sp._BIDMC_27	ftp://ftp.ncbi.nlm.nih.gov/genomes/all/GCF/000/534/415/GCF_000534415.1_Ente_cloa_complex_BIDMC_27_V1	ftp://ftp.ncbi.nlm.nih.gov/genomes/all/GCA/000/534/415/GCA_000534415.1_Ente_cloa_complex_BIDMC_27_V1	Broad_Institute	2014/02/03_00:00	2014/02/03_00:00	2014/02/03_00:00	2014/10/14_00:00	SAMN02138657	assembly	Enterobacter_spp	E_xiangfangensis	1	50		IncR	absent	absent	-	present
SAMN08737109		Homo_sapiens					GCF_003056765.1	ASM305676v1	Contig	NA	AUH-ENM3	PYGY01	4839419	157	154930	158836	Enterobacter_hormaechei_(enterobacteria)	Enterobacter_hormaechei	ftp://ftp.ncbi.nlm.nih.gov/genomes/all/GCF/003/056/765/GCF_003056765.1_ASM305676v1	ftp://ftp.ncbi.nlm.nih.gov/genomes/all/GCA/003/056/765/GCA_003056765.1_ASM305676v1	Lebanese_American_University	2018/04/18_00:00	2018/04/18_00:00	2018/04/18_00:00	2018/04/25_00:00	SAMN08737109	assembly	Enterobacter_spp	E_xiangfangensis	4	198		IncR	absent	absent	-	absent
SAMEA2273157	blood	Homo_sapiens					GCF_900077025.1	12045_4#35	Scaffold	NA	e380	FKDV01	4840533	76	174111	550	Enterobacter_cloacae_(enterobacteria)	Enterobacter_cloacae	ftp://ftp.ncbi.nlm.nih.gov/genomes/all/GCF/900/077/025/GCF_900077025.1_12045_4_35	ftp://ftp.ncbi.nlm.nih.gov/genomes/all/GCA/900/077/025/GCA_900077025.1_12045_4_35	SC	2016/04/13_00:00	2016/05/09_00:00	2016/05/09_00:00	2016/05/14_00:00	SAMEA2273157	assembly	Enterobacter_spp	E_xiangfangensis	1	50		NA	absent	absent	-	present
SAMEA2273473	blood	Homo_sapiens					GCF_900076605.1	12045_5#53	Scaffold	NA	e247	FKDG01	4841022	80	143936	550	Enterobacter_cloacae_(enterobacteria)	Enterobacter_cloacae	ftp://ftp.ncbi.nlm.nih.gov/genomes/all/GCF/900/076/605/GCF_900076605.1_12045_5_53	ftp://ftp.ncbi.nlm.nih.gov/genomes/all/GCA/900/076/605/GCA_900076605.1_12045_5_53	SC	2016/04/13_00:00	2016/05/09_00:00	2016/05/09_00:00	2016/05/14_00:00	SAMEA2273473	assembly	Enterobacter_spp	E_xiangfangensis	4	108		IncR	absent	absent	-	absent
SAMN03283672	Unknown	Unknown	Unknown		Barry_Kreiswirth		GCF_000957005.1	ASM95700v1	Contig	NA	35642	JZZG01	4841061	92	185823	61645	Enterobacter_asburiae_(enterobacteria)	Enterobacter_asburiae	ftp://ftp.ncbi.nlm.nih.gov/genomes/all/GCF/000/957/005/GCF_000957005.1_ASM95700v1	ftp://ftp.ncbi.nlm.nih.gov/genomes/all/GCA/000/957/005/GCA_000957005.1_ASM95700v1	JCVI	2015/03/19_00:00	2015/03/19_00:00	2015/03/19_00:00	2015/03/24_00:00	SAMN03283672	assembly	Enterobacter_spp	E_asburiae	#N/A	252		IncFIB_IncFII_IncL/M_IncN	absent	absent	blaKPC-2	present
SAMEA4608437	faecal	Homo_sapiens					GCA_902163285.1	25964_2#109	Contig	NA	4928STDY7071690	CABGYR01	4841749	43	466445	550	Enterobacter_cloacae_(enterobacteria)	Enterobacter_cloacae	NA	ftp://ftp.ncbi.nlm.nih.gov/genomes/all/GCA/902/163/285/GCA_902163285.1_25964_2_109	SC	2019/07/11_00:00	2019/07/12_00:00	2019/07/12_00:00	2019/07/12_00:00	SAMEA4608437	assembly	Enterobacter_spp	E_xiangfangensis	1	346		IncFIA_IncFIB_IncFII	absent	absent	-	present
SAMN04158323	Wound_secretion	Homo_sapiens	missing		Norwegian_National_Advisory_Unit_on_Detection_of_Antimicrobial_Resistance		GCF_001463465.1	ASM146346v1	Contig	NA	50858885	LNIO01	4841988	136	161212	1736701	Enterobacter_sp._50858885_(enterobacteria)	Enterobacter_sp._50858885	ftp://ftp.ncbi.nlm.nih.gov/genomes/all/GCF/001/463/465/GCF_001463465.1_ASM146346v1	ftp://ftp.ncbi.nlm.nih.gov/genomes/all/GCA/001/463/465/GCA_001463465.1_ASM146346v1	Norwegian_National_Advisory_Unit_on_Detection_of_Antimicrobial_Resistance	2015/12/09_00:00	2015/12/09_00:00	2015/12/09_00:00	2016/01/27_00:00	SAMN04158323	assembly	Enterobacter_spp	E_xiangfangensis	3	92		IncFIB_IncFII_rep21_repUS13	absent	absent	blaNDM-1	absent
SAMEA2273489	blood	Homo_sapiens					GCF_900077455.1	12045_5#65	Scaffold	NA	e615	FKFI01	4842128	82	172089	550	Enterobacter_cloacae_(enterobacteria)	Enterobacter_cloacae	ftp://ftp.ncbi.nlm.nih.gov/genomes/all/GCF/900/077/455/GCF_900077455.1_12045_5_65	ftp://ftp.ncbi.nlm.nih.gov/genomes/all/GCA/900/077/455/GCA_900077455.1_12045_5_65	SC	2016/04/13_00:00	2016/05/09_00:00	2016/05/09_00:00	2016/05/14_00:00	SAMEA2273489	assembly	Enterobacter_spp	E_xiangfangensis	1	50		NA	absent	absent	-	present
SAMN09845220		Homo_sapiens					GCF_003964535.1	ASM396453v1	Contig	NA	WCHEH090055	RXRY01	4843650	76	231472	158836	Enterobacter_hormaechei_(enterobacteria)	Enterobacter_hormaechei	ftp://ftp.ncbi.nlm.nih.gov/genomes/all/GCF/003/964/535/GCF_003964535.1_ASM396453v1	ftp://ftp.ncbi.nlm.nih.gov/genomes/all/GCA/003/964/535/GCA_003964535.1_ASM396453v1	West_China_Hospital,_Sichuan_University	2018/12/23_00:00	2018/12/23_00:00	2018/12/23_00:00	2018/12/28_00:00	SAMN09845220	assembly	Enterobacter_spp	E_xiangfangensis	3	171		IncX3	absent	absent	blaNDM-5	absent
SAMEA2273387	blood	Homo_sapiens					GCF_900075925.1	12082_4#49	Scaffold	NA	e1603	FJZS01	4843827	53	138295	550	Enterobacter_cloacae_(enterobacteria)	Enterobacter_cloacae	ftp://ftp.ncbi.nlm.nih.gov/genomes/all/GCF/900/075/925/GCF_900075925.1_12082_4_49	ftp://ftp.ncbi.nlm.nih.gov/genomes/all/GCA/900/075/925/GCA_900075925.1_12082_4_49	SC	2016/04/13_00:00	2016/05/09_00:00	2016/05/09_00:00	2016/05/12_00:00	SAMEA2273387	assembly	Enterobacter_spp	E_xiangfangensis	2	78		IncFIB_IncFII	absent	absent	-	absent
SAMEA104567279	faecal	Homo_sapiens					GCA_902162715.1	25964_2#40	Scaffold	NA	4928STDY7071168	CABGWJ01	4844417	58	224934	550	Enterobacter_cloacae_(enterobacteria)	Enterobacter_cloacae	NA	ftp://ftp.ncbi.nlm.nih.gov/genomes/all/GCA/902/162/715/GCA_902162715.1_25964_2_40	SC	2019/07/11_00:00	2019/07/12_00:00	2019/07/12_00:00	2019/07/12_00:00	SAMEA104567279	assembly	Enterobacter_spp	E_xiangfangensis	2	268		IncFIB_IncFII	absent	absent	-	absent
SAMN04572684	Unknown	Homo_sapiens	Bloodstream_infection		Vance_Fowler		GCF_001631125.1	ASM163112v1	Contig	NA	GN05606	LVUH01	4844571	103	99950	1296536	Enterobacter_hormaechei_subsp._xiangfangensis_(enterobacteria)	Enterobacter_hormaechei	ftp://ftp.ncbi.nlm.nih.gov/genomes/all/GCF/001/631/125/GCF_001631125.1_ASM163112v1	ftp://ftp.ncbi.nlm.nih.gov/genomes/all/GCA/001/631/125/GCA_001631125.1_ASM163112v1	JCVI	2016/04/25_00:00	2016/04/25_00:00	2016/04/25_00:00	2018/10/10_00:00	SAMN04572684	assembly	Enterobacter_spp	E_xiangfangensis	3	295		IncFIB_IncFII	absent	absent	-	absent
SAMN03261526	water_supply_from_a_pigs_farm				Vet_Food_Agro_Diagnostics_(M)_Sdn_Bhd		GCF_000812425.1	ASM81242v1	Contig	NA	GN1	JWPV01	4844730	120	109685	1812935	Enterobacter_roggenkampii_(enterobacteria)	Enterobacter_roggenkampii	ftp://ftp.ncbi.nlm.nih.gov/genomes/all/GCF/000/812/425/GCF_000812425.1_ASM81242v1	ftp://ftp.ncbi.nlm.nih.gov/genomes/all/GCA/000/812/425/GCA_000812425.1_ASM81242v1	University_of_Malaya	2014/12/31_00:00	2014/12/31_00:00	2014/12/31_00:00	2019/01/07_00:00	SAMN03261526	assembly	Enterobacter_spp	E_roggenkampii	#N/A	716		IncFIB_IncR	absent	absent	-	present
SAMEA2273254	blood	Homo_sapiens					GCF_900077955.1	11983_7#28	Scaffold	NA	e856	FKHF01	4845079	61	194181	550	Enterobacter_cloacae_(enterobacteria)	Enterobacter_cloacae	ftp://ftp.ncbi.nlm.nih.gov/genomes/all/GCF/900/077/955/GCF_900077955.1_11983_7_28	ftp://ftp.ncbi.nlm.nih.gov/genomes/all/GCA/900/077/955/GCA_900077955.1_11983_7_28	SC	2016/04/13_00:00	2016/05/09_00:00	2016/05/09_00:00	2016/05/14_00:00	SAMEA2273254	assembly	Enterobacter_spp	E_xiangfangensis	4	68		IncR_pENTAS02	absent	absent	-	absent
SAMN08932720		Homo_sapiens					GCF_003965775.1	ASM396577v1	Contig	NA	SCEH020006	RXQA01	4845333	118	125496	158836	Enterobacter_hormaechei_(enterobacteria)	Enterobacter_hormaechei	ftp://ftp.ncbi.nlm.nih.gov/genomes/all/GCF/003/965/775/GCF_003965775.1_ASM396577v1	ftp://ftp.ncbi.nlm.nih.gov/genomes/all/GCA/003/965/775/GCA_003965775.1_ASM396577v1	West_China_Hospital,_Sichuan_University	2018/12/23_00:00	2018/12/23_00:00	2018/12/23_00:00	2018/12/28_00:00	SAMN08932720	assembly	Enterobacter_spp	E_xiangfangensis	3	564		IncHI2_IncHI2A	absent	absent	blaNDM-1	absent
SAMEA2742603	not_available:_to_be_reported_later	not_available				not_available:_to_be_reported_later	GCF_900447465.1	32868_F01	Contig	NA	NCTC13464	UGIS01	4845343	2	4597538	550	Enterobacter_cloacae_(enterobacteria)	Enterobacter_cloacae	ftp://ftp.ncbi.nlm.nih.gov/genomes/all/GCF/900/447/465/GCF_900447465.1_32868_F01	ftp://ftp.ncbi.nlm.nih.gov/genomes/all/GCA/900/447/465/GCA_900447465.1_32868_F01	SC	2018/08/01_00:00	2018/08/02_00:00	2018/08/02_00:00	2018/08/04_00:00	SAMEA2742603	assembly	Enterobacter_spp	E_xiangfangensis	2	278		IncHI2_IncHI2A	absent	absent	-	absent
SAMN03021527		Danio_rerio		6_day			GCF_000798855.1	ZOR0014.1	Scaffold	NA	ZOR0014	JTLF01	4845633	413	24954	1339232	Enterobacter_sp._ZOR0014_(enterobacteria)	Enterobacter_sp._ZOR0014	ftp://ftp.ncbi.nlm.nih.gov/genomes/all/GCF/000/798/855/GCF_000798855.1_ZOR0014.1	ftp://ftp.ncbi.nlm.nih.gov/genomes/all/GCA/000/798/855/GCA_000798855.1_ZOR0014.1	University_of_Oregon	2014/12/08_00:00	2014/12/08_00:00	2014/12/08_00:00	2015/06/17_00:00	SAMN03021527	assembly	Enterobacter_spp	E_kobei	#N/A	-		NA	absent	absent	-	present
SAMN06451350	metal						GCA_002360935.1	ASM236093v1	Scaffold	UBA3340		DERM01	4846057	58	124256	550	Enterobacter_cloacae_(enterobacteria)	Enterobacter_cloacae	NA	ftp://ftp.ncbi.nlm.nih.gov/genomes/all/GCA/002/360/935/GCA_002360935.1_ASM236093v1	University_of_Queensland	2017/09/26_00:00	2017/09/26_00:00	2017/09/26_00:00	2017/09/26_00:00	SAMN06451350	assembly	Enterobacter_spp	E_kobei	#N/A	-		IncFII	absent	absent	-	present
SAMEA2273203	blood	Homo_sapiens					GCF_900077495.1	12045_4#74	Scaffold	NA	e629	FKFM01	4846188	57	174573	550	Enterobacter_cloacae_(enterobacteria)	Enterobacter_cloacae	ftp://ftp.ncbi.nlm.nih.gov/genomes/all/GCF/900/077/495/GCF_900077495.1_12045_4_74	ftp://ftp.ncbi.nlm.nih.gov/genomes/all/GCA/900/077/495/GCA_900077495.1_12045_4_74	SC	2016/04/13_00:00	2016/05/09_00:00	2016/05/09_00:00	2016/05/14_00:00	SAMEA2273203	assembly	Enterobacter_spp	E_xiangfangensis	3	114		IncL/M	absent	absent	-	absent
SAMEA2273459	blood	Homo_sapiens					GCF_900076645.1	12045_5#38	Scaffold	NA	e2487	FKCO01	4846456	57	197149	550	Enterobacter_cloacae_(enterobacteria)	Enterobacter_cloacae	ftp://ftp.ncbi.nlm.nih.gov/genomes/all/GCF/900/076/645/GCF_900076645.1_12045_5_38	ftp://ftp.ncbi.nlm.nih.gov/genomes/all/GCA/900/076/645/GCA_900076645.1_12045_5_38	SC	2016/04/13_00:00	2016/05/09_00:00	2016/05/09_00:00	2016/05/14_00:00	SAMEA2273459	assembly	Enterobacter_spp	E_xiangfangensis	4	68		IncR_pENTAS02	absent	absent	-	absent
SAMEA104567278	faecal	Homo_sapiens					GCA_902162615.1	25964_2#39	Scaffold	NA	4928STDY7071167	CABGWI01	4846655	45	274045	550	Enterobacter_cloacae_(enterobacteria)	Enterobacter_cloacae	NA	ftp://ftp.ncbi.nlm.nih.gov/genomes/all/GCA/902/162/615/GCA_902162615.1_25964_2_39	SC	2019/07/11_00:00	2019/07/12_00:00	2019/07/12_00:00	2019/07/12_00:00	SAMEA104567278	assembly	Enterobacter_spp	E_xiangfangensis	2	268		IncFIB_IncFII	absent	absent	-	absent
SAMEA2273211	blood	Homo_sapiens					GCF_900076905.1	12045_4#82	Scaffold	NA	e302	FKCP01	4847026	48	192851	550	Enterobacter_cloacae_(enterobacteria)	Enterobacter_cloacae	ftp://ftp.ncbi.nlm.nih.gov/genomes/all/GCF/900/076/905/GCF_900076905.1_12045_4_82	ftp://ftp.ncbi.nlm.nih.gov/genomes/all/GCA/900/076/905/GCA_900076905.1_12045_4_82	SC	2016/04/13_00:00	2016/05/09_00:00	2016/05/09_00:00	2016/05/14_00:00	SAMEA2273211	assembly	Enterobacter_spp	E_xiangfangensis	4	68		IncR_pENTAS02	absent	absent	-	absent
SAMEA2273403	blood	Homo_sapiens					GCF_900076095.1	12082_4#51	Scaffold	NA	e1714	FKAJ01	4847096	97	138312	550	Enterobacter_cloacae_(enterobacteria)	Enterobacter_cloacae	ftp://ftp.ncbi.nlm.nih.gov/genomes/all/GCF/900/076/095/GCF_900076095.1_12082_4_51	ftp://ftp.ncbi.nlm.nih.gov/genomes/all/GCA/900/076/095/GCA_900076095.1_12082_4_51	SC	2016/04/13_00:00	2016/05/09_00:00	2016/05/09_00:00	2016/05/12_00:00	SAMEA2273403	assembly	Enterobacter_spp	E_xiangfangensis	2	78		IncFIB	absent	absent	-	absent
SAMN03005138							GCF_000770155.1	ASM77015v1	Complete_Genome	NA	GGT036	NA	4848754	1	4848754	550	Enterobacter_cloacae_(enterobacteria)	Enterobacter_cloacae	ftp://ftp.ncbi.nlm.nih.gov/genomes/all/GCF/000/770/155/GCF_000770155.1_ASM77015v1	ftp://ftp.ncbi.nlm.nih.gov/genomes/all/GCA/000/770/155/GCA_000770155.1_ASM77015v1	Korea_Institute_of_Science_and_Technology	2014/10/31_00:00	2014/10/31_00:00	2014/10/31_00:00	2015/01/21_00:00	SAMN03005138	assembly	Enterobacter_spp	E_cloacae	#N/A	432		NA	absent	absent	-	present
SAMN09435811	urine_sample	Homo_sapiens	Not_available		French_National_Reference_Center_for_Antibiotic_Resistance		GCF_003289795.1	ASM328979v1	Scaffold	NA	99G9	QMDF01	4849068	207	98064	1296536	Enterobacter_hormaechei_subsp._xiangfangensis_(enterobacteria)	Enterobacter_hormaechei	ftp://ftp.ncbi.nlm.nih.gov/genomes/all/GCF/003/289/795/GCF_003289795.1_ASM328979v1	ftp://ftp.ncbi.nlm.nih.gov/genomes/all/GCA/003/289/795/GCA_003289795.1_ASM328979v1	CHU_de_Bicetre	2018/07/06_00:00	2018/07/06_00:00	2018/07/06_00:00	2018/07/11_00:00	SAMN09435811	assembly	Enterobacter_spp	E_xiangfangensis	3	66		IncFIB_IncFII	absent	absent	-	absent
SAMEA2273299	blood	Homo_sapiens					GCF_900075345.1	11983_7#75	Scaffold	NA	e1163	FJXP01	4849604	56	175873	550	Enterobacter_cloacae_(enterobacteria)	Enterobacter_cloacae	ftp://ftp.ncbi.nlm.nih.gov/genomes/all/GCF/900/075/345/GCF_900075345.1_11983_7_75	ftp://ftp.ncbi.nlm.nih.gov/genomes/all/GCA/900/075/345/GCA_900075345.1_11983_7_75	SC	2016/04/05_00:00	2016/04/06_00:00	2016/04/06_00:00	2016/04/12_00:00	SAMEA2273299	assembly	Enterobacter_spp	E_xiangfangensis	1	50		NA	absent	absent	-	present
SAMN04015005	missing	missing	missing		missing		GCF_003071645.1	ASM307164v1	Complete_Genome	NA	FDA-CDC-AR_0164	NA	4849791	1	4849791	2077136	Enterobacter_cloacae_complex_sp._FDA-CDC-AR_0164_(enterobacteria)	Enterobacter_cloacae_complex_sp._FDA-CDC-AR_0164	ftp://ftp.ncbi.nlm.nih.gov/genomes/all/GCF/003/071/645/GCF_003071645.1_ASM307164v1	ftp://ftp.ncbi.nlm.nih.gov/genomes/all/GCA/003/071/645/GCA_003071645.1_ASM307164v1	Centers_for_Disease_Control_and_Prevention	2018/04/25_00:00	2018/04/25_00:00	2018/04/25_00:00	2018/04/28_00:00	SAMN04015005	assembly	Enterobacter_spp	E_ludwigii	#N/A	-		NA	absent	absent	blaNMC-A	present
SAMN03196970	missing	Homo_sapiens	missing		UW_clinical_laboratory		GCF_001052645.1	ASM105264v1	Contig	NA	1009_ECLO	JWGM01	4849952	139	94295	61645	Enterobacter_asburiae_(enterobacteria)	Enterobacter_asburiae	ftp://ftp.ncbi.nlm.nih.gov/genomes/all/GCF/001/052/645/GCF_001052645.1_ASM105264v1	ftp://ftp.ncbi.nlm.nih.gov/genomes/all/GCA/001/052/645/GCA_001052645.1_ASM105264v1	University_of_Washington	2015/07/10_00:00	2015/07/10_00:00	2015/07/10_00:00	2016/07/19_00:00	SAMN03196970	assembly	Enterobacter_spp	E_asburiae	#N/A	162		IncR	absent	absent	-	present
SAMN03198102	missing	Homo_sapiens	missing		UW_clinical_laboratory		GCF_001059535.1	ASM105953v1	Contig	NA	895_ECLO	JUOY01	4850541	193	65286	61645	Enterobacter_asburiae_(enterobacteria)	Enterobacter_asburiae	ftp://ftp.ncbi.nlm.nih.gov/genomes/all/GCF/001/059/535/GCF_001059535.1_ASM105953v1	ftp://ftp.ncbi.nlm.nih.gov/genomes/all/GCA/001/059/535/GCA_001059535.1_ASM105953v1	University_of_Washington	2015/07/10_00:00	2015/07/10_00:00	2015/07/10_00:00	2016/07/19_00:00	SAMN03198102	assembly	Enterobacter_spp	E_asburiae	#N/A	162		IncR	absent	absent	-	present
SAMEA2273145	blood	Homo_sapiens					GCF_900076865.1	12045_4#23	Scaffold	NA	e294	FKCL01	4851354	42	240516	550	Enterobacter_cloacae_(enterobacteria)	Enterobacter_cloacae	ftp://ftp.ncbi.nlm.nih.gov/genomes/all/GCF/900/076/865/GCF_900076865.1_12045_4_23	ftp://ftp.ncbi.nlm.nih.gov/genomes/all/GCA/900/076/865/GCA_900076865.1_12045_4_23	SC	2016/04/13_00:00	2016/05/09_00:00	2016/05/09_00:00	2016/05/14_00:00	SAMEA2273145	assembly	Enterobacter_spp	E_xiangfangensis	1	110		IncFIB_IncFII	absent	absent	-	present
SAMN11283933	blood	Homo_sapiens	Bacteremia		Christian_Medical_college		GCF_004684365.1	ASM468436v1	Complete_Genome	NA	BP10374	NA	4851717	1	4851717	1812935	Enterobacter_roggenkampii_(enterobacteria)	Enterobacter_roggenkampii	ftp://ftp.ncbi.nlm.nih.gov/genomes/all/GCF/004/684/365/GCF_004684365.1_ASM468436v1	ftp://ftp.ncbi.nlm.nih.gov/genomes/all/GCA/004/684/365/GCA_004684365.1_ASM468436v1	Christian_Medical_college,_Vellore	2019/04/07_00:00	2019/04/07_00:00	2019/04/07_00:00	2019/04/09_00:00	SAMN11283933	assembly	Enterobacter_spp	E_roggenkampii	#N/A	1142		NA	absent	absent	-	present
SAMN03196973	missing	Homo_sapiens	missing		UW_clinical_laboratory		GCF_001052635.1	ASM105263v1	Contig	NA	1011_EASB	JWGJ01	4851967	165	82815	61645	Enterobacter_asburiae_(enterobacteria)	Enterobacter_asburiae	ftp://ftp.ncbi.nlm.nih.gov/genomes/all/GCF/001/052/635/GCF_001052635.1_ASM105263v1	ftp://ftp.ncbi.nlm.nih.gov/genomes/all/GCA/001/052/635/GCA_001052635.1_ASM105263v1	University_of_Washington	2015/07/10_00:00	2015/07/10_00:00	2015/07/10_00:00	2015/07/19_00:00	SAMN03196973	assembly	Enterobacter_spp	E_asburiae	#N/A	162		IncR	absent	absent	-	present
SAMN03283675	Unknown	Unknown	Unknown		Barry_Kreiswirth		GCF_000957255.1	ASM95725v1	Contig	NA	41948	JZYK01	4851992	68	172129	301102	Enterobacter_hormaechei_subsp._oharae_(enterobacteria)	Enterobacter_hormaechei	ftp://ftp.ncbi.nlm.nih.gov/genomes/all/GCF/000/957/255/GCF_000957255.1_ASM95725v1	ftp://ftp.ncbi.nlm.nih.gov/genomes/all/GCA/000/957/255/GCA_000957255.1_ASM95725v1	JCVI	2015/03/19_00:00	2015/03/19_00:00	2015/03/19_00:00	2016/06/23_00:00	SAMN03283675	assembly	Enterobacter_spp	E_xiangfangensis	3	171		FIA_IncFIA	absent	absent	blaKPC-3	absent
SAMN03099688	bronchoalveolar_lavage_from_kidney_transplant_patient	Homo_sapiens	kidney_transplant		Emory_University		GCA_001620245.1	ASM162024v1	Complete_Genome	NA	colR/S	NA	4852104	2	4828976	550	Enterobacter_cloacae_(enterobacteria)	Enterobacter_cloacae	NA	ftp://ftp.ncbi.nlm.nih.gov/genomes/all/GCA/001/620/245/GCA_001620245.1_ASM162024v1	Emory_University	2016/04/15_00:00	2016/04/18_00:00	2016/04/18_00:00	2016/04/18_00:00	SAMN03099688	assembly	Enterobacter_spp	E_asburiae	#N/A	252		IncHI1A_IncHI1B	absent	absent	-	present
SAMN03277199	excreted_bodily_substance	Homo_sapiens			CIDEIM		GCF_000966135.1	ASM96613v1	Contig	NA	CIDEIMsCOL12	JZKW01	4852202	118	163071	1296536	Enterobacter_hormaechei_subsp._xiangfangensis_(enterobacteria)	Enterobacter_hormaechei	ftp://ftp.ncbi.nlm.nih.gov/genomes/all/GCF/000/966/135/GCF_000966135.1_ASM96613v1	ftp://ftp.ncbi.nlm.nih.gov/genomes/all/GCA/000/966/135/GCA_000966135.1_ASM96613v1	JCVI	2015/03/30_00:00	2015/03/30_00:00	2015/03/30_00:00	2018/10/10_00:00	SAMN03277199	assembly	Enterobacter_spp	E_xiangfangensis	3	171		FIA_IncFIA_IncFIB_IncP6	absent	absent	blaKPC-2	absent
SAMN02581380	Fluid	Homo_sapiens					GCF_000694955.1	Lell_amni_CHS_78_V1	Scaffold	NA	CHS_78	JMZV01	4852316	39	258712	1812934	Enterobacter_hormaechei_subsp._hoffmannii_(enterobacteria)	Enterobacter_hormaechei	ftp://ftp.ncbi.nlm.nih.gov/genomes/all/GCF/000/694/955/GCF_000694955.1_Lell_amni_CHS_78_V1	ftp://ftp.ncbi.nlm.nih.gov/genomes/all/GCA/000/694/955/GCA_000694955.1_Lell_amni_CHS_78_V1	Broad_Institute	2014/05/19_00:00	2014/05/19_00:00	2014/05/19_00:00	2018/10/26_00:00	SAMN02581380	assembly	Enterobacter_spp	E_xiangfangensis	2	78		IncHI2A_IncL/M	absent	absent	-	absent
SAMEA2273154	blood	Homo_sapiens					GCF_900076985.1	12045_4#32	Scaffold	NA	e351	FKDQ01	4852652	74	194686	550	Enterobacter_cloacae_(enterobacteria)	Enterobacter_cloacae	ftp://ftp.ncbi.nlm.nih.gov/genomes/all/GCF/900/076/985/GCF_900076985.1_12045_4_32	ftp://ftp.ncbi.nlm.nih.gov/genomes/all/GCA/900/076/985/GCA_900076985.1_12045_4_32	SC	2016/04/13_00:00	2016/05/09_00:00	2016/05/09_00:00	2016/05/14_00:00	SAMEA2273154	assembly	Enterobacter_spp	E_xiangfangensis	4	68		IncFIB_IncR_pENTAS02	absent	absent	-	absent
SAMN04572592	Unknown	Homo_sapiens	Bloodstream_infection		Vance_Fowler		GCF_001631425.1	ASM163142v1	Contig	NA	GN04697	LVTR01	4853167	79	124585	299766	Enterobacter_hormaechei_subsp._steigerwaltii_(enterobacteria)	Enterobacter_hormaechei	ftp://ftp.ncbi.nlm.nih.gov/genomes/all/GCF/001/631/425/GCF_001631425.1_ASM163142v1	ftp://ftp.ncbi.nlm.nih.gov/genomes/all/GCA/001/631/425/GCA_001631425.1_ASM163142v1	JCVI	2016/04/25_00:00	2016/04/25_00:00	2016/04/25_00:00	2016/04/26_00:00	SAMN04572592	assembly	Enterobacter_spp	E_xiangfangensis	1	50		IncFIB_IncFII	absent	absent	-	present
SAMN10644690	missing	Homo_sapiens	not_specified		CHU_limoges		GCF_004004935.1	ASM400493v1	Contig	NA	120I6	RZVI01	4853302	243	69667	158836	Enterobacter_hormaechei_(enterobacteria)	Enterobacter_hormaechei	ftp://ftp.ncbi.nlm.nih.gov/genomes/all/GCF/004/004/935/GCF_004004935.1_ASM400493v1	ftp://ftp.ncbi.nlm.nih.gov/genomes/all/GCA/004/004/935/GCA_004004935.1_ASM400493v1	Universite_Paris_Sud	2019/01/08_00:00	2019/01/09_00:00	2019/01/09_00:00	2019/01/12_00:00	SAMN10644690	assembly	Enterobacter_spp	E_xiangfangensis	3	114		IncL/M	absent	absent	-	absent
SAMEA2273150	blood	Homo_sapiens					GCF_900076955.1	12045_4#27	Scaffold	NA	e319	FKDM01	4853483	62	207714	550	Enterobacter_cloacae_(enterobacteria)	Enterobacter_cloacae	ftp://ftp.ncbi.nlm.nih.gov/genomes/all/GCF/900/076/955/GCF_900076955.1_12045_4_27	ftp://ftp.ncbi.nlm.nih.gov/genomes/all/GCA/900/076/955/GCA_900076955.1_12045_4_27	SC	2016/04/13_00:00	2016/05/09_00:00	2016/05/09_00:00	2016/05/14_00:00	SAMEA2273150	assembly	Enterobacter_spp	E_xiangfangensis	3	182		IncFII_IncHI2_IncHI2A	present	absent	-	absent
SAMN04252952	Unknown	Homo_sapiens	clinical_or_host-associated_bacteria	31_years	Johann_Pitout		GCF_001473175.1	SMART_1095.v1	Contig	NA	SMART_1095	LPOI01	4853752	100	267922	1296536	Enterobacter_hormaechei_subsp._xiangfangensis_(enterobacteria)	Enterobacter_hormaechei	ftp://ftp.ncbi.nlm.nih.gov/genomes/all/GCF/001/473/175/GCF_001473175.1_SMART_1095.v1	ftp://ftp.ncbi.nlm.nih.gov/genomes/all/GCA/001/473/175/GCA_001473175.1_SMART_1095.v1	JCVI	2015/12/21_00:00	2015/12/21_00:00	2015/12/21_00:00	2018/10/10_00:00	SAMN04252952	assembly	Enterobacter_spp	E_xiangfangensis	3	136		FIA_IncFIA_IncFIB_IncR	absent	absent	blaVIM-1	absent
SAMN05526242	Rhizopshere	Sorghum_bicolor					GCA_001708345.1	ASM170834v1	Chromosome	NA	SBP-8	NA	4854065	204	37201	550	Enterobacter_cloacae_(enterobacteria)	Enterobacter_cloacae	NA	ftp://ftp.ncbi.nlm.nih.gov/genomes/all/GCA/001/708/345/GCA_001708345.1_ASM170834v1	Birla_Institute_of_Technology_&amp;_Science	2016/08/23_00:00	2016/08/23_00:00	2016/08/23_00:00	2016/08/23_00:00	SAMN05526242	assembly	Enterobacter_spp	E_cloacae	#N/A	432		NA	absent	absent	-	present
SAMN03012836	excreted_bodily_substance	Homo_sapiens	urinary_tract_infection		Dr_Mayo		GCF_000784095.1	SPADES_assembly_of_Enterobacter_cloacae_ND20	Contig	NA	ND20	JTCC02	4854421	71	170301	1296536	Enterobacter_hormaechei_subsp._xiangfangensis_(enterobacteria)	Enterobacter_hormaechei	ftp://ftp.ncbi.nlm.nih.gov/genomes/all/GCF/000/784/095/GCF_000784095.1_SPADES_assembly_of_Enterobacter_cloacae_ND20	ftp://ftp.ncbi.nlm.nih.gov/genomes/all/GCA/000/784/095/GCA_000784095.2_SPADES_assembly_of_Enterobacter_cloacae_ND20	JCVI	2014/12/17_00:00	2014/12/17_00:00	2014/12/17_00:00	2018/10/10_00:00	SAMN03012836	assembly	Enterobacter_spp	E_xiangfangensis	3	171		FIA_IncFIA_IncX3	absent	absent	blaKPC-3	absent
SAMN03277197	bodily_fluid	Homo_sapiens			CIDEIM		GCF_000966095.1	ASM96609v1	Contig	NA	CIDEIMsCOL10	JZKU01	4856456	36	422812	336306	Enterobacter_cloacae_subsp._cloacae_(enterobacteria)	Enterobacter_cloacae	ftp://ftp.ncbi.nlm.nih.gov/genomes/all/GCF/000/966/095/GCF_000966095.1_ASM96609v1	ftp://ftp.ncbi.nlm.nih.gov/genomes/all/GCA/000/966/095/GCA_000966095.1_ASM96609v1	JCVI	2015/03/30_00:00	2015/03/30_00:00	2015/03/30_00:00	2016/06/23_00:00	SAMN03277197	assembly	Enterobacter_spp	E_cloacae	#N/A	712		IncP6	absent	absent	blaKPC-2	present
SAMN08737336		Homo_sapiens					GCF_003056865.1	ASM305686v1	Contig	NA	AUH-ENM8	PYHD01	4856492	88	493764	158836	Enterobacter_hormaechei_(enterobacteria)	Enterobacter_hormaechei	ftp://ftp.ncbi.nlm.nih.gov/genomes/all/GCF/003/056/865/GCF_003056865.1_ASM305686v1	ftp://ftp.ncbi.nlm.nih.gov/genomes/all/GCA/003/056/865/GCA_003056865.1_ASM305686v1	Lebanese_American_University	2018/04/18_00:00	2018/04/18_00:00	2018/04/18_00:00	2018/04/25_00:00	SAMN08737336	assembly	Enterobacter_spp	E_xiangfangensis	1	113		IncFIB_IncFII_rep21_repUS13	absent	absent	-	present
SAMEA2273423	blood	Homo_sapiens					GCF_900076275.1	12045_5#3	Scaffold	NA	e1889	FKIU01	4856648	66	159932	550	Enterobacter_cloacae_(enterobacteria)	Enterobacter_cloacae	ftp://ftp.ncbi.nlm.nih.gov/genomes/all/GCF/900/076/275/GCF_900076275.1_12045_5_3	ftp://ftp.ncbi.nlm.nih.gov/genomes/all/GCA/900/076/275/GCA_900076275.1_12045_5_3	SC	2016/04/15_00:00	2016/05/09_00:00	2016/05/09_00:00	2016/05/14_00:00	SAMEA2273423	assembly	Enterobacter_spp	E_xiangfangensis	2	168		IncFIB	absent	absent	-	absent
SAMN03012832	Tissues	Homo_sapiens	surveillance		M._Brekken		GCF_000784075.1	SPADES_assembly_of_Enterobacter_cloacae_ND18	Contig	NA	ND18	JTCB02	4857052	63	196321	1296536	Enterobacter_hormaechei_subsp._xiangfangensis_(enterobacteria)	Enterobacter_hormaechei	ftp://ftp.ncbi.nlm.nih.gov/genomes/all/GCF/000/784/075/GCF_000784075.1_SPADES_assembly_of_Enterobacter_cloacae_ND18	ftp://ftp.ncbi.nlm.nih.gov/genomes/all/GCA/000/784/075/GCA_000784075.2_SPADES_assembly_of_Enterobacter_cloacae_ND18	JCVI	2014/12/17_00:00	2014/12/17_00:00	2014/12/17_00:00	2018/10/10_00:00	SAMN03012832	assembly	Enterobacter_spp	E_xiangfangensis	3	171		FIA_IncFIA_IncX4	absent	absent	blaNDM,blaKPC-3	absent
SAMN05718081	urine	Homo_sapiens	urinary_tract_infection	35	University_of_Mississippi_Medical_Center		GCF_002878435.1	ASM287843v1	Scaffold	NA	KPC4_1	MRBC01	4857072	98	159501	158836	Enterobacter_hormaechei_(enterobacteria)	Enterobacter_hormaechei	ftp://ftp.ncbi.nlm.nih.gov/genomes/all/GCF/002/878/435/GCF_002878435.1_ASM287843v1	ftp://ftp.ncbi.nlm.nih.gov/genomes/all/GCA/002/878/435/GCA_002878435.1_ASM287843v1	University_of_Mississippi_Medical_Center	2018/01/08_00:00	2018/01/12_00:00	2018/01/12_00:00	2018/01/17_00:00	SAMN05718081	assembly	Enterobacter_spp	E_xiangfangensis	3	597		FIA_IncFIA_IncFIB_IncFII_IncHI2_IncHI2A_repA	present	absent	blaKPC-4	absent
SAMN06218067	blood	Homo_sapiens	Not_applicable		Barry_Kreiswirth		GCF_002161915.1	ASM216191v1	Contig	NA	41948	NDFA01	4857219	51	269139	1296536	Enterobacter_hormaechei_subsp._xiangfangensis_(enterobacteria)	Enterobacter_hormaechei	ftp://ftp.ncbi.nlm.nih.gov/genomes/all/GCF/002/161/915/GCF_002161915.1_ASM216191v1	ftp://ftp.ncbi.nlm.nih.gov/genomes/all/GCA/002/161/915/GCA_002161915.1_ASM216191v1	JCVI	2017/05/31_00:00	2017/05/31_00:00	2017/05/31_00:00	2018/10/19_00:00	SAMN06218067	assembly	Enterobacter_spp	E_xiangfangensis	3	171		FIA_IncFIA	absent	absent	blaKPC-3	absent
SAMEA3855957							GCF_900048055.1	Enterobacter_asburiae	Contig	NA	LH74	FCNO01	4858268	36	475165	61645	Enterobacter_asburiae_(enterobacteria)	Enterobacter_asburiae	ftp://ftp.ncbi.nlm.nih.gov/genomes/all/GCF/900/048/055/GCF_900048055.1_Enterobacter_asburiae	ftp://ftp.ncbi.nlm.nih.gov/genomes/all/GCA/900/048/055/GCA_900048055.1_Enterobacter_asburiae	URMITE	2016/01/30_00:00	2016/03/12_00:00	2016/03/12_00:00	2016/03/16_00:00	SAMEA3855957	assembly	Enterobacter_spp	Unidentified-5	#N/A	644		NA	absent	absent	-	present
SAMN02581386	urine	Homo_sapiens					GCF_000692335.1	Ente_cloa_MGH_54_V1	Scaffold	NA	MGH_54	JMUU01	4858591	24	566827	1439330	Enterobacter_roggenkampii_MGH_54_(enterobacteria)	Enterobacter_roggenkampii	ftp://ftp.ncbi.nlm.nih.gov/genomes/all/GCF/000/692/335/GCF_000692335.1_Ente_cloa_MGH_54_V1	ftp://ftp.ncbi.nlm.nih.gov/genomes/all/GCA/000/692/335/GCA_000692335.1_Ente_cloa_MGH_54_V1	Broad_Institute	2014/05/19_00:00	2014/05/19_00:00	2014/05/19_00:00	2014/10/09_00:00	SAMN02581386	assembly	Enterobacter_spp	E_roggenkampii	#N/A	730		IncFIB_IncFII_pENTAS02	absent	absent	-	present
SAMN03012831	excreted_bodily_substance	Homo_sapiens	urinary_tract_infection		Dr_Hella		GCF_000802785.1	SPADES_assembly_of_Enterobacter_cloacae_ND19	Contig	NA	ND19	JUIA01	4858698	72	181578	1296536	Enterobacter_hormaechei_subsp._xiangfangensis_(enterobacteria)	Enterobacter_hormaechei	ftp://ftp.ncbi.nlm.nih.gov/genomes/all/GCF/000/802/785/GCF_000802785.1_SPADES_assembly_of_Enterobacter_cloacae_ND19	ftp://ftp.ncbi.nlm.nih.gov/genomes/all/GCA/000/802/785/GCA_000802785.1_SPADES_assembly_of_Enterobacter_cloacae_ND19	JCVI	2014/12/16_00:00	2014/12/16_00:00	2014/12/16_00:00	2016/06/15_00:00	SAMN03012831	assembly	Enterobacter_spp	E_xiangfangensis	3	171		FIA_IncFIA	absent	absent	blaNDM,blaKPC-3	absent
SAMN02356630	aspirate,_JP_drain	Homo_sapiens					GCF_000534035.1	Ente_cloa_UCI_50_V1	Scaffold	NA	UCI_50	JCKK01	4859223	12	590610	1400155	Enterobacter_hormaechei_subsp._hoffmannii_UCI_50_(enterobacteria)	Enterobacter_hormaechei	ftp://ftp.ncbi.nlm.nih.gov/genomes/all/GCF/000/534/035/GCF_000534035.1_Ente_cloa_UCI_50_V1	ftp://ftp.ncbi.nlm.nih.gov/genomes/all/GCA/000/534/035/GCA_000534035.1_Ente_cloa_UCI_50_V1	Broad_Institute	2014/02/03_00:00	2014/02/03_00:00	2014/02/03_00:00	2014/10/09_00:00	SAMN02356630	assembly	Enterobacter_spp	E_xiangfangensis	2	152		IncFIB_IncFII	absent	absent	-	absent
SAMN03283622	Unknown	Unknown	Unknown		Barry_Kreiswirth		GCF_000957825.1	ASM95782v1	Contig	NA	35013	JZZU01	4859360	59	211951	299766	Enterobacter_hormaechei_subsp._steigerwaltii_(enterobacteria)	Enterobacter_hormaechei	ftp://ftp.ncbi.nlm.nih.gov/genomes/all/GCF/000/957/825/GCF_000957825.1_ASM95782v1	ftp://ftp.ncbi.nlm.nih.gov/genomes/all/GCA/000/957/825/GCA_000957825.1_ASM95782v1	JCVI	2015/03/19_00:00	2015/03/19_00:00	2015/03/19_00:00	2016/06/23_00:00	SAMN03283622	assembly	Enterobacter_spp	E_xiangfangensis	1	461		NA	absent	absent	blaKPC-2	present
SAMN03277207	bodily_fluid	Homo_sapiens			CIDEIM		GCF_000966165.1	ASM96616v1	Contig	NA	CIDEIMsCOL20	JZLE01	4860167	91	167517	1296536	Enterobacter_hormaechei_subsp._xiangfangensis_(enterobacteria)	Enterobacter_hormaechei	ftp://ftp.ncbi.nlm.nih.gov/genomes/all/GCF/000/966/165/GCF_000966165.1_ASM96616v1	ftp://ftp.ncbi.nlm.nih.gov/genomes/all/GCA/000/966/165/GCA_000966165.1_ASM96616v1	JCVI	2015/03/30_00:00	2015/03/30_00:00	2015/03/30_00:00	2018/10/10_00:00	SAMN03277207	assembly	Enterobacter_spp	E_xiangfangensis	3	264		IncFIB_IncFII_IncL/M_IncP6_IncX5	absent	absent	blaKPC-2	absent
SAMN03333173	urine	Homo_sapiens	Not_available		missing		GCF_000958725.1	ASM95872v1	Scaffold	NA	MNCRE86	JZCW01	4860515	141	136586	158836	Enterobacter_hormaechei_(enterobacteria)	Enterobacter_hormaechei	ftp://ftp.ncbi.nlm.nih.gov/genomes/all/GCF/000/958/725/GCF_000958725.1_ASM95872v1	ftp://ftp.ncbi.nlm.nih.gov/genomes/all/GCA/000/958/725/GCA_000958725.1_ASM95872v1	University_of_Minnesota	2015/03/20_00:00	2015/03/20_00:00	2015/03/20_00:00	2019/01/07_00:00	SAMN03333173	assembly	Enterobacter_spp	E_xiangfangensis	3	171		FIA_IncFIA	absent	absent	blaKPC-3	absent
SAMN03280190	missing	Homo_sapiens	missing	missing	missing	missing	GCF_001037835.1	Ente_cloa_complex_BIDMC99_V1	Scaffold	NA	BIDMC99	LETN01	4860915	11	1421804	1686398	Enterobacter_sp._BIDMC99_(enterobacteria)	Enterobacter_sp._BIDMC99	ftp://ftp.ncbi.nlm.nih.gov/genomes/all/GCF/001/037/835/GCF_001037835.1_Ente_cloa_complex_BIDMC99_V1	ftp://ftp.ncbi.nlm.nih.gov/genomes/all/GCA/001/037/835/GCA_001037835.1_Ente_cloa_complex_BIDMC99_V1	Broad_Institute	2015/06/22_00:00	2015/06/22_00:00	2015/06/22_00:00	2016/01/21_00:00	SAMN03280190	assembly	Enterobacter_spp	E_xiangfangensis	1	50		NA	absent	absent	-	present
SAMN03197764	missing	Homo_sapiens	missing		UW_clinical_laboratory		GCF_001057315.1	ASM105731v1	Contig	NA	564_ECLO	JVBY01	4860952	99	118469	550	Enterobacter_cloacae_(enterobacteria)	Enterobacter_cloacae	ftp://ftp.ncbi.nlm.nih.gov/genomes/all/GCF/001/057/315/GCF_001057315.1_ASM105731v1	ftp://ftp.ncbi.nlm.nih.gov/genomes/all/GCA/001/057/315/GCA_001057315.1_ASM105731v1	University_of_Washington	2015/07/10_00:00	2015/07/10_00:00	2015/07/10_00:00	2015/07/19_00:00	SAMN03197764	assembly	Enterobacter_spp	E_cloacae	#N/A	373		NA	absent	absent	-	present
SAMN00259689		Homo_sapiens					GCF_000213995.1	ASM21399v1	Scaffold	NA	ATCC_49162	AFHR01	4860996	84	107933	888063	Enterobacter_hormaechei_ATCC_49162_(enterobacteria)	Enterobacter_hormaechei	ftp://ftp.ncbi.nlm.nih.gov/genomes/all/GCF/000/213/995/GCF_000213995.1_ASM21399v1	ftp://ftp.ncbi.nlm.nih.gov/genomes/all/GCA/000/213/995/GCA_000213995.1_ASM21399v1	Baylor_College_of_Medicine	2011/05/20_00:00	2011/05/20_00:00	2011/05/20_00:00	2014/10/09_00:00	SAMN00259689	assembly	Enterobacter_spp	E_hormaechei	#N/A	528	yes	IncFIB	absent	absent	-	absent
SAMEA2273317	blood	Homo_sapiens					GCF_900074985.1	11983_7#93	Scaffold	NA	e1251	FJXN01	4861133	51	272116	550	Enterobacter_cloacae_(enterobacteria)	Enterobacter_cloacae	ftp://ftp.ncbi.nlm.nih.gov/genomes/all/GCF/900/074/985/GCF_900074985.1_11983_7_93	ftp://ftp.ncbi.nlm.nih.gov/genomes/all/GCA/900/074/985/GCA_900074985.1_11983_7_93	SC	2016/04/05_00:00	2016/04/06_00:00	2016/04/06_00:00	2016/04/12_00:00	SAMEA2273317	assembly	Enterobacter_spp	E_xiangfangensis	4	108		IncFIB_IncFII	absent	absent	-	absent
SAMN10534791	unknown	Homo_sapiens					GCF_004004595.1	ASM400459v1	Contig	NA	Entb306	RXFU01	4861244	7	2519539	158836	Enterobacter_hormaechei_(enterobacteria)	Enterobacter_hormaechei	ftp://ftp.ncbi.nlm.nih.gov/genomes/all/GCF/004/004/595/GCF_004004595.1_ASM400459v1	ftp://ftp.ncbi.nlm.nih.gov/genomes/all/GCA/004/004/595/GCA_004004595.1_ASM400459v1	Creighton_University	2019/01/08_00:00	2019/01/09_00:00	2019/01/09_00:00	2019/01/12_00:00	SAMN10534791	assembly	Enterobacter_spp	E_xiangfangensis	3	-		NA	absent	absent	-	absent
SAMEA2273235	blood	Homo_sapiens					GCF_900077735.1	11983_7#10	Scaffold	NA	e783	FKGH01	4861954	51	201826	550	Enterobacter_cloacae_(enterobacteria)	Enterobacter_cloacae	ftp://ftp.ncbi.nlm.nih.gov/genomes/all/GCF/900/077/735/GCF_900077735.1_11983_7_10	ftp://ftp.ncbi.nlm.nih.gov/genomes/all/GCA/900/077/735/GCA_900077735.1_11983_7_10	SC	2016/04/13_00:00	2016/05/09_00:00	2016/05/09_00:00	2016/05/14_00:00	SAMEA2273235	assembly	Enterobacter_spp	E_xiangfangensis	1	93		NA	absent	absent	-	present
SAMN03197765	missing	Homo_sapiens	missing		UW_clinical_laboratory		GCF_001055365.1	ASM105536v1	Contig	NA	565_ECLO	JVBX01	4862089	105	104566	550	Enterobacter_cloacae_(enterobacteria)	Enterobacter_cloacae	ftp://ftp.ncbi.nlm.nih.gov/genomes/all/GCF/001/055/365/GCF_001055365.1_ASM105536v1	ftp://ftp.ncbi.nlm.nih.gov/genomes/all/GCA/001/055/365/GCA_001055365.1_ASM105536v1	University_of_Washington	2015/07/10_00:00	2015/07/10_00:00	2015/07/10_00:00	2015/07/19_00:00	SAMN03197765	assembly	Enterobacter_spp	E_cloacae	#N/A	373		NA	absent	absent	-	present
SAMN03333162	trachea	Homo_sapiens	Not_available		missing		GCF_000952495.1	ASM95249v1	Scaffold	NA	MNCRE57	JYML01	4862703	199	107820	158836	Enterobacter_hormaechei_(enterobacteria)	Enterobacter_hormaechei	ftp://ftp.ncbi.nlm.nih.gov/genomes/all/GCF/000/952/495/GCF_000952495.1_ASM95249v1	ftp://ftp.ncbi.nlm.nih.gov/genomes/all/GCA/000/952/495/GCA_000952495.1_ASM95249v1	University_of_Minnesota	2015/03/13_00:00	2015/03/13_00:00	2015/03/13_00:00	2019/01/07_00:00	SAMN03333162	assembly	Enterobacter_spp	E_xiangfangensis	3	171		FIA_IncFIA_IncX3	absent	absent	blaKPC-3	absent
SAMN03732703	bodily_fluid	Homo_sapiens			Vance_Fowler		GCF_001022345.1	ASM102234v1	Contig	NA	GN02413	LEDZ01	4862731	58	316485	299766	Enterobacter_hormaechei_subsp._steigerwaltii_(enterobacteria)	Enterobacter_hormaechei	ftp://ftp.ncbi.nlm.nih.gov/genomes/all/GCF/001/022/345/GCF_001022345.1_ASM102234v1	ftp://ftp.ncbi.nlm.nih.gov/genomes/all/GCA/001/022/345/GCA_001022345.1_ASM102234v1	JCVI	2015/06/09_00:00	2015/06/09_00:00	2015/06/09_00:00	2016/06/23_00:00	SAMN03732703	assembly	Enterobacter_spp	E_xiangfangensis	1	461		NA	absent	absent	-	present
SAMD00089463		Homo_sapiens					GCF_002333645.1	ASM233364v1	Scaffold	NA	TUM10669	BEEJ01	4862750	232	45266	158836	Enterobacter_hormaechei_(enterobacteria)	Enterobacter_hormaechei	ftp://ftp.ncbi.nlm.nih.gov/genomes/all/GCF/002/333/645/GCF_002333645.1_ASM233364v1	ftp://ftp.ncbi.nlm.nih.gov/genomes/all/GCA/002/333/645/GCA_002333645.1_ASM233364v1	Toho_University	2017/08/28_00:00	2017/09/21_00:00	2017/09/21_00:00	2017/09/23_00:00	SAMD00089463	assembly	Enterobacter_spp	E_xiangfangensis	2	78		IncFIB_IncW	absent	absent	blaIMP-1	absent
SAMN07448206	rectal	Homo_sapiens	None_(screening_isolate)		Koh_Tse_Hsien,_Singapore_General_Hospital		GCF_002278195.1	ASM227819v1	Scaffold	NA	DS25697	NPNM01	4862829	68	175198	550	Enterobacter_cloacae_(enterobacteria)	Enterobacter_cloacae	ftp://ftp.ncbi.nlm.nih.gov/genomes/all/GCF/002/278/195/GCF_002278195.1_ASM227819v1	ftp://ftp.ncbi.nlm.nih.gov/genomes/all/GCA/002/278/195/GCA_002278195.1_ASM227819v1	National_University_of_Singapore_and_Genome_Institute_of_Singapore	2017/08/30_00:00	2017/08/30_00:00	2017/08/30_00:00	2017/09/01_00:00	SAMN07448206	assembly	Enterobacter_spp	E_cloacae	#N/A	820		NA	absent	absent	blaIMI-1	present
SAMN09845197		Homo_sapiens					GCF_003965645.1	ASM396564v1	Contig	NA	WCHEH090019	RXRC01	4863426	75	200743	158836	Enterobacter_hormaechei_(enterobacteria)	Enterobacter_hormaechei	ftp://ftp.ncbi.nlm.nih.gov/genomes/all/GCF/003/965/645/GCF_003965645.1_ASM396564v1	ftp://ftp.ncbi.nlm.nih.gov/genomes/all/GCA/003/965/645/GCA_003965645.1_ASM396564v1	West_China_Hospital,_Sichuan_University	2018/12/23_00:00	2018/12/23_00:00	2018/12/23_00:00	2018/12/28_00:00	SAMN09845197	assembly	Enterobacter_spp	E_xiangfangensis	2	78		IncFIB_IncFII	absent	absent	-	absent
SAMEA2273453	blood	Homo_sapiens					GCF_900076555.1	12045_5#32	Scaffold	NA	e2352	FKIS01	4863661	56	202725	550	Enterobacter_cloacae_(enterobacteria)	Enterobacter_cloacae	ftp://ftp.ncbi.nlm.nih.gov/genomes/all/GCF/900/076/555/GCF_900076555.1_12045_5_32	ftp://ftp.ncbi.nlm.nih.gov/genomes/all/GCA/900/076/555/GCA_900076555.1_12045_5_32	SC	2016/04/15_00:00	2016/05/09_00:00	2016/05/09_00:00	2016/05/13_00:00	SAMEA2273453	assembly	Enterobacter_spp	E_xiangfangensis	1	90		IncN	absent	absent	blaVIM-4	present
SAMN03159286							GCF_900110475.1	IMG-taxon_2602042067_annotated_assembly	Scaffold	NA	NFIX58	FODW01	4863713	21	461784	1566251	Enterobacter_sp._NFIX58_(enterobacteria)	Enterobacter_sp._NFIX58	ftp://ftp.ncbi.nlm.nih.gov/genomes/all/GCF/900/110/475/GCF_900110475.1_IMG-taxon_2602042067_annotated_assembly	ftp://ftp.ncbi.nlm.nih.gov/genomes/all/GCA/900/110/475/GCA_900110475.1_IMG-taxon_2602042067_annotated_assembly	DOE_-_JOINT_GENOME_INSTITUTE	2016/10/31_00:00	2016/11/07_00:00	2016/11/07_00:00	2017/07/29_00:00	SAMN03159286	assembly	Enterobacter_spp	E_quasiroggenkampii	#N/A	747		NA	absent	absent	-	present
SAMN09435827	rectal_swab	Homo_sapiens	Not_available		French_National_Reference_Center_for_Antibiotic_Resistance		GCF_003289225.1	ASM328922v1	Scaffold	NA	168A8	QMCP01	4864770	185	84362	1812935	Enterobacter_roggenkampii_(enterobacteria)	Enterobacter_roggenkampii	ftp://ftp.ncbi.nlm.nih.gov/genomes/all/GCF/003/289/225/GCF_003289225.1_ASM328922v1	ftp://ftp.ncbi.nlm.nih.gov/genomes/all/GCA/003/289/225/GCA_003289225.1_ASM328922v1	CHU_de_Bicetre	2018/07/06_00:00	2018/07/06_00:00	2018/07/06_00:00	2019/01/08_00:00	SAMN09435827	assembly	Enterobacter_spp	E_roggenkampii	#N/A	595		pENTAS02	absent	absent	-	present
SAMEA2273226	blood	Homo_sapiens					GCF_900077635.1	12045_4#96	Scaffold	NA	e722	FKFY01	4865333	69	142549	550	Enterobacter_cloacae_(enterobacteria)	Enterobacter_cloacae	ftp://ftp.ncbi.nlm.nih.gov/genomes/all/GCF/900/077/635/GCF_900077635.1_12045_4_96	ftp://ftp.ncbi.nlm.nih.gov/genomes/all/GCA/900/077/635/GCA_900077635.1_12045_4_96	SC	2016/04/13_00:00	2016/05/09_00:00	2016/05/09_00:00	2016/05/14_00:00	SAMEA2273226	assembly	Enterobacter_spp	E_xiangfangensis	2	78		IncFIB	absent	absent	-	absent
SAMEA104567518	faecal	Homo_sapiens					GCA_902160255.1	25426_7#160	Scaffold	NA	4928STDY7071407	CABGNJ01	4865522	119	172866	550	Enterobacter_cloacae_(enterobacteria)	Enterobacter_cloacae	NA	ftp://ftp.ncbi.nlm.nih.gov/genomes/all/GCA/902/160/255/GCA_902160255.1_25426_7_160	SC	2019/07/08_00:00	2019/07/12_00:00	2019/07/12_00:00	2019/07/12_00:00	SAMEA104567518	assembly	Enterobacter_spp	E_xiangfangensis	2	145		FIA_IncFIA_IncFIB	present	absent	-	absent
SAMN08998672	cloaca_swabs_from_commercial_farm	chicken			Beijing_Advanced_Innovation_Center_for_Food_Nutrition_and_Human_Health,_College_of_Veterinary_Medicine,_China_Agricultural_University,_Beijing.		GCF_004136725.1	ASM413672v1	Contig	NA	2DZ2F2B	QFLM01	4865958	115	211175	2511984	Enterobacter_cloacae_complex_sp._2DZ2F2B_(enterobacteria)	Enterobacter_cloacae_complex_sp._2DZ2F2B	ftp://ftp.ncbi.nlm.nih.gov/genomes/all/GCF/004/136/725/GCF_004136725.1_ASM413672v1	ftp://ftp.ncbi.nlm.nih.gov/genomes/all/GCA/004/136/725/GCA_004136725.1_ASM413672v1	College_of_Veterinary_Medicine,China_Agricultural_University	2019/02/04_00:00	2019/02/04_00:00	2019/02/04_00:00	2019/02/07_00:00	SAMN08998672	assembly	Enterobacter_spp	E_xiangfangensis	3	994		IncHI2_IncHI2A_IncX3	absent	absent	blaNDM-5	absent
SAMN08027260		Homo_sapiens					GCF_003964745.1	ASM396474v1	Contig	NA	SCEH020142	RXPR01	4866200	102	177022	158836	Enterobacter_hormaechei_(enterobacteria)	Enterobacter_hormaechei	ftp://ftp.ncbi.nlm.nih.gov/genomes/all/GCF/003/964/745/GCF_003964745.1_ASM396474v1	ftp://ftp.ncbi.nlm.nih.gov/genomes/all/GCA/003/964/745/GCA_003964745.1_ASM396474v1	West_China_Hospital,_Sichuan_University	2018/12/23_00:00	2018/12/23_00:00	2018/12/23_00:00	2018/12/28_00:00	SAMN08027260	assembly	Enterobacter_spp	E_xiangfangensis	3	182		IncFIB_IncFII_IncR_IncX3	absent	absent	blaNDM-1	absent
SAMN02581288	ABSCESS,_PELVIC_DRAIN	Homo_sapiens					GCF_000692255.1	Ente_cloa_BIDMC_67_V1	Scaffold	NA	BIDMC_67	JMUQ01	4866487	20	1318673	208224	Enterobacter_kobei_(enterobacteria)	Enterobacter_kobei	ftp://ftp.ncbi.nlm.nih.gov/genomes/all/GCF/000/692/255/GCF_000692255.1_Ente_cloa_BIDMC_67_V1	ftp://ftp.ncbi.nlm.nih.gov/genomes/all/GCA/000/692/255/GCA_000692255.1_Ente_cloa_BIDMC_67_V1	Broad_Institute	2014/05/19_00:00	2014/05/19_00:00	2014/05/19_00:00	2018/11/14_00:00	SAMN02581288	assembly	Enterobacter_spp	E_kobei	#N/A	-		FIA_IncFIA_IncFIB_IncFII	absent	present	-	absent
SAMEA104567513	faecal	Homo_sapiens					GCA_902160205.1	25426_7#155	Scaffold	NA	4928STDY7071402	CABGMU01	4867594	124	172930	550	Enterobacter_cloacae_(enterobacteria)	Enterobacter_cloacae	NA	ftp://ftp.ncbi.nlm.nih.gov/genomes/all/GCA/902/160/205/GCA_902160205.1_25426_7_155	SC	2019/07/08_00:00	2019/07/12_00:00	2019/07/12_00:00	2019/07/12_00:00	SAMEA104567513	assembly	Enterobacter_spp	E_xiangfangensis	2	145		FIA_IncFIA_IncFIB	present	absent	-	absent
SAMEA2273223	blood	Homo_sapiens					GCF_900077585.1	12045_4#93	Scaffold	NA	e703	FKFT01	4867976	97	90205	550	Enterobacter_cloacae_(enterobacteria)	Enterobacter_cloacae	ftp://ftp.ncbi.nlm.nih.gov/genomes/all/GCF/900/077/585/GCF_900077585.1_12045_4_93	ftp://ftp.ncbi.nlm.nih.gov/genomes/all/GCA/900/077/585/GCA_900077585.1_12045_4_93	SC	2016/04/13_00:00	2016/05/09_00:00	2016/05/09_00:00	2016/05/14_00:00	SAMEA2273223	assembly	Enterobacter_spp	E_xiangfangensis	2	-		IncFIB_IncFII_IncN_IncR	absent	absent	-	absent
SAMN04407790	Unknown	Homo_sapiens	Bloodstream_infection		Vance_Fowler		GCF_001518605.1	ASM151860v1	Contig	NA	GN04369	LRCT01	4868602	165	47475	301102	Enterobacter_hormaechei_subsp._oharae_(enterobacteria)	Enterobacter_hormaechei	ftp://ftp.ncbi.nlm.nih.gov/genomes/all/GCF/001/518/605/GCF_001518605.1_ASM151860v1	ftp://ftp.ncbi.nlm.nih.gov/genomes/all/GCA/001/518/605/GCA_001518605.1_ASM151860v1	JCVI	2016/01/19_00:00	2016/01/19_00:00	2016/01/19_00:00	2018/10/10_00:00	SAMN04407790	assembly	Enterobacter_spp	E_xiangfangensis	4	108		IncFIB_IncFII_IncR_IncX5	absent	absent	-	absent
SAMEA2273470	blood	Homo_sapiens					GCF_900076795.1	12045_5#50	Scaffold	NA	e2770	FKDA01	4868632	55	235097	550	Enterobacter_cloacae_(enterobacteria)	Enterobacter_cloacae	ftp://ftp.ncbi.nlm.nih.gov/genomes/all/GCF/900/076/795/GCF_900076795.1_12045_5_50	ftp://ftp.ncbi.nlm.nih.gov/genomes/all/GCA/900/076/795/GCA_900076795.1_12045_5_50	SC	2016/04/13_00:00	2016/05/09_00:00	2016/05/09_00:00	2016/05/14_00:00	SAMEA2273470	assembly	Enterobacter_spp	E_xiangfangensis	1	106		IncFIB_IncFII	absent	absent	-	present
SAMN03401388		Oryza_sativa					GCF_001475985.1	ASM147598v1	Contig	NA	NS31	LDQJ01	4869467	45	261547	69218	Enterobacter_cancerogenus_(enterobacteria)	Enterobacter_cancerogenus	ftp://ftp.ncbi.nlm.nih.gov/genomes/all/GCF/001/475/985/GCF_001475985.1_ASM147598v1	ftp://ftp.ncbi.nlm.nih.gov/genomes/all/GCA/001/475/985/GCA_001475985.1_ASM147598v1	Bacterial_Genomics_and_Evolution_Laboratory,_CSIR-Institute_of_Microbial_Technology,_Sector_39-A,_Chandigarh,_India	2015/12/22_00:00	2015/12/22_00:00	2015/12/22_00:00	2015/12/23_00:00	SAMN03401388	assembly	Enterobacter_spp	E_cancerogenus	#N/A	-		NA	absent	absent	-	present
SAMEA2273498	blood	Homo_sapiens					GCF_900075505.1	12045_5#71	Scaffold	NA	e1331	FJYC01	4869777	68	183347	550	Enterobacter_cloacae_(enterobacteria)	Enterobacter_cloacae	ftp://ftp.ncbi.nlm.nih.gov/genomes/all/GCF/900/075/505/GCF_900075505.1_12045_5_71	ftp://ftp.ncbi.nlm.nih.gov/genomes/all/GCA/900/075/505/GCA_900075505.1_12045_5_71	SC	2016/04/05_00:00	2016/04/06_00:00	2016/04/06_00:00	2016/04/12_00:00	SAMEA2273498	assembly	Enterobacter_spp	E_xiangfangensis	4	108		IncFIB_IncFII	absent	absent	-	absent
SAMN03197758	missing	Homo_sapiens	missing		UW_clinical_laboratory		GCF_001057255.1	ASM105725v1	Contig	NA	559_ECLO	JVCE01	4869888	67	146212	550	Enterobacter_cloacae_(enterobacteria)	Enterobacter_cloacae	ftp://ftp.ncbi.nlm.nih.gov/genomes/all/GCF/001/057/255/GCF_001057255.1_ASM105725v1	ftp://ftp.ncbi.nlm.nih.gov/genomes/all/GCA/001/057/255/GCA_001057255.1_ASM105725v1	University_of_Washington	2015/07/10_00:00	2015/07/10_00:00	2015/07/10_00:00	2015/07/19_00:00	SAMN03197758	assembly	Enterobacter_spp	E_cloacae	#N/A	373		NA	absent	absent	-	present
SAMEA104567496	faecal	Homo_sapiens					GCA_902160055.1	25426_7#140	Scaffold	NA	4928STDY7071387	CABGMI01	4870018	100	193900	550	Enterobacter_cloacae_(enterobacteria)	Enterobacter_cloacae	NA	ftp://ftp.ncbi.nlm.nih.gov/genomes/all/GCA/902/160/055/GCA_902160055.1_25426_7_140	SC	2019/07/08_00:00	2019/07/12_00:00	2019/07/12_00:00	2019/07/12_00:00	SAMEA104567496	assembly	Enterobacter_spp	E_kobei	#N/A	125		NA	absent	absent	-	present
SAMN08027261		Homo_sapiens					GCF_003985265.1	ASM398526v1	Contig	NA	WCHEH085055	RXPS01	4870618	131	292041	158836	Enterobacter_hormaechei_(enterobacteria)	Enterobacter_hormaechei	ftp://ftp.ncbi.nlm.nih.gov/genomes/all/GCF/003/985/265/GCF_003985265.1_ASM398526v1	ftp://ftp.ncbi.nlm.nih.gov/genomes/all/GCA/003/985/265/GCA_003985265.1_ASM398526v1	West_China_Hospital,_Sichuan_University	2018/12/28_00:00	2018/12/28_00:00	2018/12/28_00:00	2019/01/02_00:00	SAMN08027261	assembly	Enterobacter_spp	E_xiangfangensis	3	291		IncFIC_IncFII_IncN	absent	absent	blaIMP-4	absent
SAMEA2273278	blood	Homo_sapiens					GCF_900078145.1	11983_7#54	Scaffold	NA	e978	FKIC01	4871008	93	206753	550	Enterobacter_cloacae_(enterobacteria)	Enterobacter_cloacae	ftp://ftp.ncbi.nlm.nih.gov/genomes/all/GCF/900/078/145/GCF_900078145.1_11983_7_54	ftp://ftp.ncbi.nlm.nih.gov/genomes/all/GCA/900/078/145/GCA_900078145.1_11983_7_54	SC	2016/04/13_00:00	2016/05/09_00:00	2016/05/09_00:00	2016/05/14_00:00	SAMEA2273278	assembly	Enterobacter_spp	E_xiangfangensis	4	108		IncFIB_IncFII	absent	absent	-	absent
SAMN08027252		Homo_sapiens					GCF_003985275.1	ASM398527v1	Contig	NA	WCHEB045359	RXPM01	4871055	36	340698	881260	Enterobacter_bugandensis_(enterobacteria)	Enterobacter_bugandensis	ftp://ftp.ncbi.nlm.nih.gov/genomes/all/GCF/003/985/275/GCF_003985275.1_ASM398527v1	ftp://ftp.ncbi.nlm.nih.gov/genomes/all/GCA/003/985/275/GCA_003985275.1_ASM398527v1	West_China_Hospital,_Sichuan_University	2018/12/28_00:00	2018/12/28_00:00	2018/12/28_00:00	2019/01/02_00:00	SAMN08027252	assembly	Enterobacter_spp	E_bugandensis	#N/A	35		IncFIB_IncFII	absent	absent	-	present
SAMN06237083	soil						GCF_002072125.1	ASM207212v1	Contig	NA	C9	MTKD01	4871986	25	430159	69218	Enterobacter_cancerogenus_(enterobacteria)	Enterobacter_cancerogenus	ftp://ftp.ncbi.nlm.nih.gov/genomes/all/GCF/002/072/125/GCF_002072125.1_ASM207212v1	ftp://ftp.ncbi.nlm.nih.gov/genomes/all/GCA/002/072/125/GCA_002072125.1_ASM207212v1	Institute_of_Microbial_Technology	2017/03/23_00:00	2017/03/23_00:00	2017/03/23_00:00	2017/03/26_00:00	SAMN06237083	assembly	Enterobacter_spp	E_chuandaensis	#N/A	944		NA	absent	absent	-	present
SAMN08932726		Homo_sapiens					GCF_003965455.1	ASM396545v1	Contig	NA	WCHEH040008	RXQG01	4872085	75	193288	158836	Enterobacter_hormaechei_(enterobacteria)	Enterobacter_hormaechei	ftp://ftp.ncbi.nlm.nih.gov/genomes/all/GCF/003/965/455/GCF_003965455.1_ASM396545v1	ftp://ftp.ncbi.nlm.nih.gov/genomes/all/GCA/003/965/455/GCA_003965455.1_ASM396545v1	West_China_Hospital,_Sichuan_University	2018/12/23_00:00	2018/12/23_00:00	2018/12/23_00:00	2018/12/28_00:00	SAMN08932726	assembly	Enterobacter_spp	E_xiangfangensis	3	114		IncHI2_IncHI2A_IncX3	absent	absent	blaNDM-5	absent
SAMEA2273238	blood	Homo_sapiens					GCF_900077755.1	11983_7#13	Scaffold	NA	e798	FKGL01	4872162	52	152725	550	Enterobacter_cloacae_(enterobacteria)	Enterobacter_cloacae	ftp://ftp.ncbi.nlm.nih.gov/genomes/all/GCF/900/077/755/GCF_900077755.1_11983_7_13	ftp://ftp.ncbi.nlm.nih.gov/genomes/all/GCA/900/077/755/GCA_900077755.1_11983_7_13	SC	2016/04/13_00:00	2016/05/09_00:00	2016/05/09_00:00	2016/05/14_00:00	SAMEA2273238	assembly	Enterobacter_spp	E_xiangfangensis	1	110		IncFII	absent	absent	-	present
SAMEA5852004	human_gut						GCA_902387855.1	UHGG_MGYG-HGUT-02499	Scaffold	MGYG-HGUT-02499		CABMNO01	4872341	62	263320	550	Enterobacter_cloacae_(enterobacteria)	Enterobacter_cloacae	NA	ftp://ftp.ncbi.nlm.nih.gov/genomes/all/GCA/902/387/855/GCA_902387855.1_UHGG_MGYG-HGUT-02499	EMG	2019/08/16_00:00	2019/08/17_00:00	2019/08/17_00:00	2019/08/17_00:00	SAMEA5852004	assembly	Enterobacter_spp	E_roggenkampii	#N/A	-		IncFIB_IncFII	absent	absent	blaIMI-1	present
SAMN07448196	human_gut	Homo_sapiens	None_(screening_isolate)		Koh_Tse_Hsien,_Singapore_General_Hospital		GCF_002278385.1	ASM227838v1	Scaffold	NA	DS05262	NPNW01	4872341	62	263320	1812935	Enterobacter_roggenkampii_(enterobacteria)	Enterobacter_roggenkampii	ftp://ftp.ncbi.nlm.nih.gov/genomes/all/GCF/002/278/385/GCF_002278385.1_ASM227838v1	ftp://ftp.ncbi.nlm.nih.gov/genomes/all/GCA/002/278/385/GCA_002278385.1_ASM227838v1	National_University_of_Singapore_and_Genome_Institute_of_Singapore	2017/08/30_00:00	2017/08/30_00:00	2017/08/30_00:00	2019/01/07_00:00	SAMN07448196	assembly	Enterobacter_spp	E_roggenkampii	#N/A	-		IncFIB_IncFII	absent	absent	blaIMI-1	present
SAMN03732733	bodily_fluid	Homo_sapiens			Vance_Fowler		GCF_001022995.1	ASM102299v1	Contig	NA	GN03191	LECY01	4872892	30	550357	208224	Enterobacter_kobei_(enterobacteria)	Enterobacter_kobei	ftp://ftp.ncbi.nlm.nih.gov/genomes/all/GCF/001/022/995/GCF_001022995.1_ASM102299v1	ftp://ftp.ncbi.nlm.nih.gov/genomes/all/GCA/001/022/995/GCA_001022995.1_ASM102299v1	JCVI	2015/06/09_00:00	2015/06/09_00:00	2015/06/09_00:00	2016/07/07_00:00	SAMN03732733	assembly	Enterobacter_spp	E_kobei	#N/A	708		IncFIB_IncFII_IncX5	absent	absent	-	present
SAMN04252960	Unknown	Homo_sapiens	clinical_or_host-associated_bacteria	44_years	Johann_Pitout		GCF_001471225.1	SMART_1147.v1	Contig	NA	SMART_1147	LPOA01	4872923	53	320425	1296536	Enterobacter_hormaechei_subsp._xiangfangensis_(enterobacteria)	Enterobacter_hormaechei	ftp://ftp.ncbi.nlm.nih.gov/genomes/all/GCF/001/471/225/GCF_001471225.1_SMART_1147.v1	ftp://ftp.ncbi.nlm.nih.gov/genomes/all/GCA/001/471/225/GCA_001471225.1_SMART_1147.v1	JCVI	2015/12/21_00:00	2015/12/21_00:00	2015/12/21_00:00	2018/10/10_00:00	SAMN04252960	assembly	Enterobacter_spp	E_xiangfangensis	3	114		IncA/C_IncA/C2	absent	absent	blaVIM-1	absent
SAMN04572701	Unknown	Homo_sapiens	Bloodstream_infection		Vance_Fowler		GCF_001631485.1	ASM163148v1	Contig	NA	GN06223	LVUZ01	4873007	65	190983	299766	Enterobacter_hormaechei_subsp._steigerwaltii_(enterobacteria)	Enterobacter_hormaechei	ftp://ftp.ncbi.nlm.nih.gov/genomes/all/GCF/001/631/485/GCF_001631485.1_ASM163148v1	ftp://ftp.ncbi.nlm.nih.gov/genomes/all/GCA/001/631/485/GCA_001631485.1_ASM163148v1	JCVI	2016/04/25_00:00	2016/04/25_00:00	2016/04/25_00:00	2016/04/26_00:00	SAMN04572701	assembly	Enterobacter_spp	E_xiangfangensis	1	50		IncFIB_IncFII	absent	absent	-	present
SAMN09083225	missing	not_applicable					GCF_003634515.1	ASM363451v1	Scaffold	NA	1216	RBKW01	4873073	16	522472	61645	Enterobacter_asburiae_(enterobacteria)	Enterobacter_asburiae	ftp://ftp.ncbi.nlm.nih.gov/genomes/all/GCF/003/634/515/GCF_003634515.1_ASM363451v1	ftp://ftp.ncbi.nlm.nih.gov/genomes/all/GCA/003/634/515/GCA_003634515.1_ASM363451v1	DOE_Joint_Genome_Institute	2018/10/11_00:00	2018/10/11_00:00	2018/10/11_00:00	2018/10/18_00:00	SAMN09083225	assembly	Enterobacter_spp	Unidentified-4	#N/A	-		NA	absent	absent	-	present
SAMN02138594	wound	missing					GCF_000492715.1	Ente_cloa_BWH_29_V1	Scaffold	NA	BWH_29	AYIR01	4873123	18	671217	158836	Enterobacter_hormaechei_(enterobacteria)	Enterobacter_hormaechei	ftp://ftp.ncbi.nlm.nih.gov/genomes/all/GCF/000/492/715/GCF_000492715.1_Ente_cloa_BWH_29_V1	ftp://ftp.ncbi.nlm.nih.gov/genomes/all/GCA/000/492/715/GCA_000492715.1_Ente_cloa_BWH_29_V1	Broad_Institute	2013/10/30_00:00	2013/10/30_00:00	2013/10/30_00:00	2018/11/14_00:00	SAMN02138594	assembly	Enterobacter_spp	E_xiangfangensis	3	127		IncFIB_IncR	absent	absent	-	absent
SAMN03283618	Unknown	Unknown	Unknown		Barry_Kreiswirth		GCF_000956925.1	ASM95692v1	Contig	NA	35014	JZZT01	4873185	65	162317	1812934	Enterobacter_hormaechei_subsp._hoffmannii_(enterobacteria)	Enterobacter_hormaechei	ftp://ftp.ncbi.nlm.nih.gov/genomes/all/GCF/000/956/925/GCF_000956925.1_ASM95692v1	ftp://ftp.ncbi.nlm.nih.gov/genomes/all/GCA/000/956/925/GCA_000956925.1_ASM95692v1	JCVI	2015/03/19_00:00	2015/03/19_00:00	2015/03/19_00:00	2016/07/14_00:00	SAMN03283618	assembly	Enterobacter_spp	E_xiangfangensis	2	78		IncFIB_IncN	absent	absent	blaKPC-2	absent
SAMN07571821	pus	Homo_sapiens	suppuration	41	National_Health_Institute		GCF_002740595.1	ASM274059v1	Contig	NA	1179	NSJH01	4873236	253	83544	158836	Enterobacter_hormaechei_(enterobacteria)	Enterobacter_hormaechei	ftp://ftp.ncbi.nlm.nih.gov/genomes/all/GCF/002/740/595/GCF_002740595.1_ASM274059v1	ftp://ftp.ncbi.nlm.nih.gov/genomes/all/GCA/002/740/595/GCA_002740595.1_ASM274059v1	Universite_de_Lome	2017/10/31_00:00	2017/10/31_00:00	2017/10/31_00:00	2019/01/07_00:00	SAMN07571821	assembly	Enterobacter_spp	E_xiangfangensis	3	66		IncFIB_IncFII	absent	absent	-	absent
SAMN10976868	blood	Homo_sapiens	Bacteremia		Seattle_Children's_Hospital		GCF_004332215.1	ASM433221v1	Scaffold	NA	2011WA-SCV	SJEC01	4873244	52	300250	158836	Enterobacter_hormaechei_(enterobacteria)	Enterobacter_hormaechei	ftp://ftp.ncbi.nlm.nih.gov/genomes/all/GCF/004/332/215/GCF_004332215.1_ASM433221v1	ftp://ftp.ncbi.nlm.nih.gov/genomes/all/GCA/004/332/215/GCA_004332215.1_ASM433221v1	Seattle_Children&apos;s_Hospital	2019/03/05_00:00	2019/03/07_00:00	2019/03/07_00:00	2019/03/12_00:00	SAMN10976868	assembly	Enterobacter_spp	E_xiangfangensis	1	426		IncFIB_IncFII	absent	absent	-	present
SAMN03792301	missing	Homo_sapiens	Bacteraemia		Lancet_Laboratories		GCF_001316445.2	ASM131644v2	Contig	NA	ST252:19870317JSK	LJDJ02	4873723	103	149160	61645	Enterobacter_asburiae_(enterobacteria)	Enterobacter_asburiae	ftp://ftp.ncbi.nlm.nih.gov/genomes/all/GCF/001/316/445/GCF_001316445.2_ASM131644v2	ftp://ftp.ncbi.nlm.nih.gov/genomes/all/GCA/001/316/445/GCA_001316445.2_ASM131644v2	University_of_KwaZulu_Natal	2016/09/20_00:00	2016/09/20_00:00	2016/09/20_00:00	2016/09/21_00:00	SAMN03792301	assembly	Enterobacter_spp	E_asburiae	#N/A	252		IncFIA_IncFIB_IncFII_IncN_IncU	absent	absent	blaNDM-1	present
SAMN03283636	Unknown	Unknown	Unknown		Barry_Kreiswirth		GCF_000957925.1	ASM95792v1	Contig	NA	35030	JZZO01	4874082	70	138395	1812934	Enterobacter_hormaechei_subsp._hoffmannii_(enterobacteria)	Enterobacter_hormaechei	ftp://ftp.ncbi.nlm.nih.gov/genomes/all/GCF/000/957/925/GCF_000957925.1_ASM95792v1	ftp://ftp.ncbi.nlm.nih.gov/genomes/all/GCA/000/957/925/GCA_000957925.1_ASM95792v1	JCVI	2015/03/19_00:00	2015/03/19_00:00	2015/03/19_00:00	2016/07/14_00:00	SAMN03283636	assembly	Enterobacter_spp	E_xiangfangensis	2	78		IncFIB_IncN	absent	absent	blaKPC-2	absent
SAMN03401390		Oryza_sativa					GCF_001475965.1	ASM147596v1	Contig	NA	NS111	LDQH01	4874699	49	268762	69218	Enterobacter_cancerogenus_(enterobacteria)	Enterobacter_cancerogenus	ftp://ftp.ncbi.nlm.nih.gov/genomes/all/GCF/001/475/965/GCF_001475965.1_ASM147596v1	ftp://ftp.ncbi.nlm.nih.gov/genomes/all/GCA/001/475/965/GCA_001475965.1_ASM147596v1	Bacterial_Genomics_and_Evolution_Laboratory,_CSIR-Institute_of_Microbial_Technology,_Sector_39-A,_Chandigarh,_India	2015/12/22_00:00	2015/12/22_00:00	2015/12/22_00:00	2015/12/23_00:00	SAMN03401390	assembly	Enterobacter_spp	E_cancerogenus	#N/A	-		NA	absent	absent	-	present
SAMD00115709		Homo_sapiens					GCF_003176535.1	ASM317653v1	Contig	NA	TUM5376	BGMD01	4875023	89	347662	550	Enterobacter_cloacae_(enterobacteria)	Enterobacter_cloacae	ftp://ftp.ncbi.nlm.nih.gov/genomes/all/GCF/003/176/535/GCF_003176535.1_ASM317653v1	ftp://ftp.ncbi.nlm.nih.gov/genomes/all/GCA/003/176/535/GCA_003176535.1_ASM317653v1	Toho_University	2018/05/25_00:00	2018/05/29_00:00	2018/05/29_00:00	2018/05/31_00:00	SAMD00115709	assembly	Enterobacter_spp	E_xiangfangensis	1	-		NA	absent	absent	-	present
SAMN02470984	feces_from_giant_panda_at_Shaanxi_Rare_Wildlife_Rescuing_and_Breeding_Center	Ailuropoda_melanoleuca					GCF_000315775.1	ASM31577v1	Contig	NA	08XA1	AMGJ01	4875756	51	294992	158836	Enterobacter_hormaechei_(enterobacteria)	Enterobacter_hormaechei	ftp://ftp.ncbi.nlm.nih.gov/genomes/all/GCF/000/315/775/GCF_000315775.1_ASM31577v1	ftp://ftp.ncbi.nlm.nih.gov/genomes/all/GCA/000/315/775/GCA_000315775.1_ASM31577v1	Sichuan_University	2012/09/20_00:00	2012/11/29_00:00	2012/11/29_00:00	2019/01/07_00:00	SAMN02470984	assembly	Enterobacter_spp	E_xiangfangensis	1	656		NA	absent	absent	-	present
SAMN04014913	missing	missing	missing		missing		GCF_002954165.1	ASM295416v1	Complete_Genome	NA	AR_0072	NA	4875791	3	4684119	550	Enterobacter_cloacae_(enterobacteria)	Enterobacter_cloacae	ftp://ftp.ncbi.nlm.nih.gov/genomes/all/GCF/002/954/165/GCF_002954165.1_ASM295416v1	ftp://ftp.ncbi.nlm.nih.gov/genomes/all/GCA/002/954/165/GCA_002954165.1_ASM295416v1	Centers_for_Disease_Control_and_Prevention	2018/02/20_00:00	2018/02/27_00:00	2018/02/27_00:00	2018/03/04_00:00	SAMN04014913	assembly	Enterobacter_spp	E_xiangfangensis	4	108		IncFIB_IncFII_IncR	absent	absent	-	absent
SAMN03283634	Unknown	Unknown	Unknown		Barry_Kreiswirth		GCF_000957885.1	ASM95788v1	Contig	NA	35025	JZZQ01	4875815	68	138404	1812934	Enterobacter_hormaechei_subsp._hoffmannii_(enterobacteria)	Enterobacter_hormaechei	ftp://ftp.ncbi.nlm.nih.gov/genomes/all/GCF/000/957/885/GCF_000957885.1_ASM95788v1	ftp://ftp.ncbi.nlm.nih.gov/genomes/all/GCA/000/957/885/GCA_000957885.1_ASM95788v1	JCVI	2015/03/19_00:00	2015/03/19_00:00	2015/03/19_00:00	2016/07/14_00:00	SAMN03283634	assembly	Enterobacter_spp	E_xiangfangensis	2	78		IncFIB_IncN	absent	absent	blaKPC-2	absent
SAMN04572598	Unknown	Homo_sapiens	Bloodstream_infection		Vance_Fowler		GCF_001631195.1	ASM163119v1	Contig	NA	GN05306	LVTZ01	4876085	108	75027	69219	Enterobacter_cloacae_subsp._dissolvens_(enterobacteria)	Enterobacter_cloacae	ftp://ftp.ncbi.nlm.nih.gov/genomes/all/GCF/001/631/195/GCF_001631195.1_ASM163119v1	ftp://ftp.ncbi.nlm.nih.gov/genomes/all/GCA/001/631/195/GCA_001631195.1_ASM163119v1	JCVI	2016/04/25_00:00	2016/04/25_00:00	2016/04/25_00:00	2016/04/26_00:00	SAMN04572598	assembly	Enterobacter_spp	E_cloacae	#N/A	765		NA	absent	absent	-	present
SAMN02934530	rectal_swab	Homo_sapiens	Surveillance	2M	Children's_National_Hospital		GCF_000783675.2	ASM78367v2	Complete_Genome	NA	FDAARGOS_77	NA	4876999	1	4876999	2027919	Enterobacter_cloacae_complex_sp._(enterobacteria)	Enterobacter_cloacae_complex_sp.	ftp://ftp.ncbi.nlm.nih.gov/genomes/all/GCF/000/783/675/GCF_000783675.2_ASM78367v2	ftp://ftp.ncbi.nlm.nih.gov/genomes/all/GCA/000/783/675/GCA_000783675.2_ASM78367v2	University_of_Maryland_School_of_Medicine_Institute_for_Genome_Sciences_(IGS)_-_sequencing_center	2018/02/21_00:00	2018/02/26_00:00	2018/02/26_00:00	2018/03/07_00:00	SAMN02934530	assembly	Enterobacter_spp	E_asburiae	#N/A	252		IncFIB_IncR	absent	absent	-	present
SAMEA104567497	faecal	Homo_sapiens					GCA_902160065.1	25426_7#141	Scaffold	NA	4928STDY7071388	CABGMO01	4877424	82	233550	550	Enterobacter_cloacae_(enterobacteria)	Enterobacter_cloacae	NA	ftp://ftp.ncbi.nlm.nih.gov/genomes/all/GCA/902/160/065/GCA_902160065.1_25426_7_141	SC	2019/07/08_00:00	2019/07/12_00:00	2019/07/12_00:00	2019/07/12_00:00	SAMEA104567497	assembly	Enterobacter_spp	E_kobei	#N/A	125		NA	absent	absent	-	present
SAMN07448210	rectal	Homo_sapiens	None_(screening_isolate)		Koh_Tse_Hsien,_Singapore_General_Hospital		GCF_002278155.1	ASM227815v1	Scaffold	NA	DS8140	NPNI01	4877545	42	295626	550	Enterobacter_cloacae_(enterobacteria)	Enterobacter_cloacae	ftp://ftp.ncbi.nlm.nih.gov/genomes/all/GCF/002/278/155/GCF_002278155.1_ASM227815v1	ftp://ftp.ncbi.nlm.nih.gov/genomes/all/GCA/002/278/155/GCA_002278155.1_ASM227815v1	National_University_of_Singapore_and_Genome_Institute_of_Singapore	2017/08/30_00:00	2017/08/30_00:00	2017/08/30_00:00	2017/09/01_00:00	SAMN07448210	assembly	Enterobacter_spp	E_cloacae	#N/A	-		NA	absent	absent	blaIMI-1	present
SAMN03495976		Homo_sapiens			Vance_Fowler		GCF_001011975.1	ASM101197v1	Contig	NA	GN02225	LDCL01	4877692	65	238344	208224	Enterobacter_kobei_(enterobacteria)	Enterobacter_kobei	ftp://ftp.ncbi.nlm.nih.gov/genomes/all/GCF/001/011/975/GCF_001011975.1_ASM101197v1	ftp://ftp.ncbi.nlm.nih.gov/genomes/all/GCA/001/011/975/GCA_001011975.1_ASM101197v1	JCVI	2015/05/21_00:00	2015/05/21_00:00	2015/05/21_00:00	2016/07/07_00:00	SAMN03495976	assembly	Enterobacter_spp	E_kobei	#N/A	191		NA	absent	absent	-	present
SAMN06767792	sputum	Homo_sapiens	Unknown		Yonghong_Xiao		GCF_002785885.1	ASM278588v1	Scaffold	NA	ECC4204	NEEJ01	4878032	59	445647	1812935	Enterobacter_roggenkampii_(enterobacteria)	Enterobacter_roggenkampii	ftp://ftp.ncbi.nlm.nih.gov/genomes/all/GCF/002/785/885/GCF_002785885.1_ASM278588v1	ftp://ftp.ncbi.nlm.nih.gov/genomes/all/GCA/002/785/885/GCA_002785885.1_ASM278588v1	zhejiang_University	2017/11/17_00:00	2017/11/17_00:00	2017/11/17_00:00	2019/01/07_00:00	SAMN06767792	assembly	Enterobacter_spp	E_roggenkampii	#N/A	634		IncFII	absent	absent	-	present
SAMEA2273347	blood	Homo_sapiens					GCF_900075665.1	11983_6#26	Scaffold	NA	e1391	FJYT01	4878038	56	177319	550	Enterobacter_cloacae_(enterobacteria)	Enterobacter_cloacae	ftp://ftp.ncbi.nlm.nih.gov/genomes/all/GCF/900/075/665/GCF_900075665.1_11983_6_26	ftp://ftp.ncbi.nlm.nih.gov/genomes/all/GCA/900/075/665/GCA_900075665.1_11983_6_26	SC	2016/04/05_00:00	2016/04/06_00:00	2016/04/06_00:00	2016/04/18_00:00	SAMEA2273347	assembly	Enterobacter_spp	E_xiangfangensis	1	50		NA	absent	absent	-	present
SAMN10644709	Toilette				CHU_limoges		GCF_004005155.1	ASM400515v1	Contig	NA	064B10	RZWA01	4878192	174	140913	158836	Enterobacter_hormaechei_(enterobacteria)	Enterobacter_hormaechei	ftp://ftp.ncbi.nlm.nih.gov/genomes/all/GCF/004/005/155/GCF_004005155.1_ASM400515v1	ftp://ftp.ncbi.nlm.nih.gov/genomes/all/GCA/004/005/155/GCA_004005155.1_ASM400515v1	Universite_Paris_Sud	2019/01/08_00:00	2019/01/09_00:00	2019/01/09_00:00	2019/01/12_00:00	SAMN10644709	assembly	Enterobacter_spp	E_xiangfangensis	3	114		IncL/M	absent	absent	-	absent
SAMN03495975		Homo_sapiens			Vance_Fowler		GCF_001011955.1	ASM101195v1	Contig	NA	GN02208	LDCK01	4878246	40	187719	1812935	Enterobacter_roggenkampii_(enterobacteria)	Enterobacter_roggenkampii	ftp://ftp.ncbi.nlm.nih.gov/genomes/all/GCF/001/011/955/GCF_001011955.1_ASM101195v1	ftp://ftp.ncbi.nlm.nih.gov/genomes/all/GCA/001/011/955/GCA_001011955.1_ASM101195v1	JCVI	2015/05/21_00:00	2015/05/21_00:00	2015/05/21_00:00	2016/07/19_00:00	SAMN03495975	assembly	Enterobacter_spp	E_roggenkampii	#N/A	746		NA	absent	absent	-	present
SAMEA104567498	faecal	Homo_sapiens					GCA_902160095.1	25426_7#142	Scaffold	NA	4928STDY7071389	CABGMK01	4878323	82	228707	550	Enterobacter_cloacae_(enterobacteria)	Enterobacter_cloacae	NA	ftp://ftp.ncbi.nlm.nih.gov/genomes/all/GCA/902/160/095/GCA_902160095.1_25426_7_142	SC	2019/07/08_00:00	2019/07/12_00:00	2019/07/12_00:00	2019/07/12_00:00	SAMEA104567498	assembly	Enterobacter_spp	E_kobei	#N/A	125		NA	absent	absent	-	present
SAMEA104567536	faecal	Homo_sapiens					GCA_902160435.1	25426_7#178	Contig	NA	4928STDY7071428	CABGNU01	4878341	40	743411	550	Enterobacter_cloacae_(enterobacteria)	Enterobacter_cloacae	NA	ftp://ftp.ncbi.nlm.nih.gov/genomes/all/GCA/902/160/435/GCA_902160435.1_25426_7_178	SC	2019/07/08_00:00	2019/07/12_00:00	2019/07/12_00:00	2019/07/12_00:00	SAMEA104567536	assembly	Enterobacter_spp	E_xiangfangensis	2	138		FIA_IncFIA_IncR	absent	absent	-	absent
SAMN07714120	nares	Homo_sapiens					GCF_003086135.1	ASM308613v1	Scaffold	NA	HN503E2II	PCFB01	4878638	297	122763	2041079	Enterobacter_sp._HN503E2II_(enterobacteria)	Enterobacter_sp._HN503E2II	ftp://ftp.ncbi.nlm.nih.gov/genomes/all/GCF/003/086/135/GCF_003086135.1_ASM308613v1	ftp://ftp.ncbi.nlm.nih.gov/genomes/all/GCA/003/086/135/GCA_003086135.1_ASM308613v1	National_Institute_for_Communicable_Diseases	2018/05/02_00:00	2018/05/02_00:00	2018/05/02_00:00	2018/08/29_00:00	SAMN07714120	assembly	Enterobacter_spp	E_chengduensis	#N/A	-		rep10_rep21_repUS13	absent	absent	-	present
SAMN06767794	sputum	Homo_sapiens	Unknown		Yonghong_Xiao		GCF_002785615.1	ASM278561v1	Scaffold	NA	ECC4241	NEEH01	4878728	61	412598	1812935	Enterobacter_roggenkampii_(enterobacteria)	Enterobacter_roggenkampii	ftp://ftp.ncbi.nlm.nih.gov/genomes/all/GCF/002/785/615/GCF_002785615.1_ASM278561v1	ftp://ftp.ncbi.nlm.nih.gov/genomes/all/GCA/002/785/615/GCA_002785615.1_ASM278561v1	zhejiang_University	2017/11/17_00:00	2017/11/17_00:00	2017/11/17_00:00	2019/01/07_00:00	SAMN06767794	assembly	Enterobacter_spp	E_roggenkampii	#N/A	634		IncFII	absent	absent	-	present
SAMEA2273400	blood	Homo_sapiens					GCF_900076065.1	11983_6#78	Scaffold	NA	e1697	FKAG01	4879398	68	184915	550	Enterobacter_cloacae_(enterobacteria)	Enterobacter_cloacae	ftp://ftp.ncbi.nlm.nih.gov/genomes/all/GCF/900/076/065/GCF_900076065.1_11983_6_78	ftp://ftp.ncbi.nlm.nih.gov/genomes/all/GCA/900/076/065/GCA_900076065.1_11983_6_78	SC	2016/04/13_00:00	2016/05/09_00:00	2016/05/09_00:00	2016/05/14_00:00	SAMEA2273400	assembly	Enterobacter_spp	E_xiangfangensis	1	50		IncFIA_IncFII	absent	absent	-	present
SAMEA104113916							GCF_900185905.1	ASM90018590v1	Contig	Enterobacter_cancerogenus_ATCC33241		FYBA01	4879939	142	678345	69218	Enterobacter_cancerogenus_(enterobacteria)	Enterobacter_cancerogenus	ftp://ftp.ncbi.nlm.nih.gov/genomes/all/GCF/900/185/905/GCF_900185905.1_ASM90018590v1	ftp://ftp.ncbi.nlm.nih.gov/genomes/all/GCA/900/185/905/GCA_900185905.1_ASM90018590v1	JUSTUS_LIEBIG_UNIVERSITY	2017/06/15_00:00	2017/06/16_00:00	2017/06/16_00:00	2017/06/21_00:00	SAMEA104113916	assembly	Enterobacter_spp	E_cancerogenus	#N/A	-	yes	NA	absent	absent	-	present
SAMEA2273449	blood	Homo_sapiens					GCF_900076525.1	12045_5#27	Scaffold	NA	e2284	FKCA01	4880100	41	295992	550	Enterobacter_cloacae_(enterobacteria)	Enterobacter_cloacae	ftp://ftp.ncbi.nlm.nih.gov/genomes/all/GCF/900/076/525/GCF_900076525.1_12045_5_27	ftp://ftp.ncbi.nlm.nih.gov/genomes/all/GCA/900/076/525/GCA_900076525.1_12045_5_27	SC	2016/04/13_00:00	2016/05/09_00:00	2016/05/09_00:00	2016/05/14_00:00	SAMEA2273449	assembly	Enterobacter_spp	E_xiangfangensis	1	90		IncFIB_IncFII	absent	absent	-	present
SAMN06767793	sputum	Homo_sapiens	Unknown		Yonghong_Xiao		GCF_002785665.1	ASM278566v1	Scaffold	NA	ECC4240	NEEI01	4880712	62	411983	1812935	Enterobacter_roggenkampii_(enterobacteria)	Enterobacter_roggenkampii	ftp://ftp.ncbi.nlm.nih.gov/genomes/all/GCF/002/785/665/GCF_002785665.1_ASM278566v1	ftp://ftp.ncbi.nlm.nih.gov/genomes/all/GCA/002/785/665/GCA_002785665.1_ASM278566v1	zhejiang_University	2017/11/17_00:00	2017/11/17_00:00	2017/11/17_00:00	2019/01/07_00:00	SAMN06767793	assembly	Enterobacter_spp	E_roggenkampii	#N/A	634		IncFII	absent	absent	-	present
SAMN04431020	urine	Homo_sapiens	clinical_or_host-associated_bacteria	69_years	Johann_Pitout		GCF_001525045.1	ASM152504v1	Contig	NA	SMART_1160	LRIS01	4881351	56	428441	1296536	Enterobacter_hormaechei_subsp._xiangfangensis_(enterobacteria)	Enterobacter_hormaechei	ftp://ftp.ncbi.nlm.nih.gov/genomes/all/GCF/001/525/045/GCF_001525045.1_ASM152504v1	ftp://ftp.ncbi.nlm.nih.gov/genomes/all/GCA/001/525/045/GCA_001525045.1_ASM152504v1	JCVI	2016/01/22_00:00	2016/01/22_00:00	2016/01/22_00:00	2018/10/10_00:00	SAMN04431020	assembly	Enterobacter_spp	E_xiangfangensis	3	171		FIA_IncFIA	absent	absent	blaKPC-3	absent
SAMN03333179	urine	Homo_sapiens	Not_available		missing		GCF_000958825.1	ASM95882v1	Scaffold	NA	MNCRE83	JZDC01	4881652	109	130008	158836	Enterobacter_hormaechei_(enterobacteria)	Enterobacter_hormaechei	ftp://ftp.ncbi.nlm.nih.gov/genomes/all/GCF/000/958/825/GCF_000958825.1_ASM95882v1	ftp://ftp.ncbi.nlm.nih.gov/genomes/all/GCA/000/958/825/GCA_000958825.1_ASM95882v1	University_of_Minnesota	2015/03/20_00:00	2015/03/20_00:00	2015/03/20_00:00	2019/01/07_00:00	SAMN03333179	assembly	Enterobacter_spp	E_xiangfangensis	3	171		FIA_IncFIA_IncX3	absent	absent	blaKPC-3	absent
SAMN04252896	Unknown	Homo_sapiens	clinical_or_host-associated_bacteria	1_years	Johann_Pitout		GCF_001472055.1	SMART_286.v1	Contig	NA	SMART_286	LPQM01	4881744	65	255600	1296536	Enterobacter_hormaechei_subsp._xiangfangensis_(enterobacteria)	Enterobacter_hormaechei	ftp://ftp.ncbi.nlm.nih.gov/genomes/all/GCF/001/472/055/GCF_001472055.1_SMART_286.v1	ftp://ftp.ncbi.nlm.nih.gov/genomes/all/GCA/001/472/055/GCA_001472055.1_SMART_286.v1	JCVI	2015/12/21_00:00	2015/12/21_00:00	2015/12/21_00:00	2018/10/10_00:00	SAMN04252896	assembly	Enterobacter_spp	E_xiangfangensis	3	98		IncHI2_IncHI2A	absent	absent	blaVIM-1	absent
SAMN02567292							GCF_000568175.1	De_novo_Assembly	Contig	NA	C1	JACW01	4882441	75	143639	1442602	Enterobacter_asburiae_C1_(enterobacteria)	Enterobacter_asburiae	ftp://ftp.ncbi.nlm.nih.gov/genomes/all/GCF/000/568/175/GCF_000568175.1_De_novo_Assembly	ftp://ftp.ncbi.nlm.nih.gov/genomes/all/GCA/000/568/175/GCA_000568175.1_De_novo_Assembly	UNIVERSITY_OF_MALAYA	2014/02/10_00:00	2014/02/10_00:00	2014/02/10_00:00	2014/10/09_00:00	SAMN02567292	assembly	Enterobacter_spp	Unidentified-5	#N/A	679		IncFIB	absent	absent	-	present
SAMN03280186	missing	Homo_sapiens	missing	missing	missing	missing	GCF_001037745.1	Ente_cloa_complex_MGH128_V1	Scaffold	NA	MGH128	LETJ01	4884062	10	951026	1686394	Enterobacter_sp._MGH128_(enterobacteria)	Enterobacter_sp._MGH128	ftp://ftp.ncbi.nlm.nih.gov/genomes/all/GCF/001/037/745/GCF_001037745.1_Ente_cloa_complex_MGH128_V1	ftp://ftp.ncbi.nlm.nih.gov/genomes/all/GCA/001/037/745/GCA_001037745.1_Ente_cloa_complex_MGH128_V1	Broad_Institute	2015/06/22_00:00	2015/06/22_00:00	2015/06/22_00:00	2016/01/21_00:00	SAMN03280186	assembly	Enterobacter_spp	E_xiangfangensis	3	544		IncFIB_IncFII_IncX5	absent	absent	-	absent
SAMN03401392		Oryza_sativa					GCF_001475535.1	ASM147553v1	Contig	NA	NS104	LDQG01	4884126	52	261552	69218	Enterobacter_cancerogenus_(enterobacteria)	Enterobacter_cancerogenus	ftp://ftp.ncbi.nlm.nih.gov/genomes/all/GCF/001/475/535/GCF_001475535.1_ASM147553v1	ftp://ftp.ncbi.nlm.nih.gov/genomes/all/GCA/001/475/535/GCA_001475535.1_ASM147553v1	Bacterial_Genomics_and_Evolution_Laboratory,_CSIR-Institute_of_Microbial_Technology,_Sector_39-A,_Chandigarh,_India	2015/12/22_00:00	2015/12/22_00:00	2015/12/22_00:00	2015/12/23_00:00	SAMN03401392	assembly	Enterobacter_spp	E_cancerogenus	#N/A	-		NA	absent	absent	-	present
SAMN08436979	clinical_material	Homo_sapiens	Colonization/infection		University_Hospital_of_Pilsen		GCF_002925805.1	ASM292580v1	Contig	NA	Encl-922	PQXG01	4884183	84	209648	2027919	Enterobacter_cloacae_complex_sp._(enterobacteria)	Enterobacter_cloacae_complex_sp.	ftp://ftp.ncbi.nlm.nih.gov/genomes/all/GCF/002/925/805/GCF_002925805.1_ASM292580v1	ftp://ftp.ncbi.nlm.nih.gov/genomes/all/GCA/002/925/805/GCA_002925805.1_ASM292580v1	Veterinary_Research_Institute	2018/02/12_00:00	2018/02/12_00:00	2018/02/12_00:00	2018/02/15_00:00	SAMN08436979	assembly	Enterobacter_spp	E_xiangfangensis	3	182		IncFIB_IncFII_IncX3	absent	absent	blaNDM-4	absent
SAMN06921734	missing	missing	missing		missing		GCF_004343625.1	ASM434362v1	Contig	NA	ABYVI	SKFJ01	4884241	38	495902	158836	Enterobacter_hormaechei_(enterobacteria)	Enterobacter_hormaechei	ftp://ftp.ncbi.nlm.nih.gov/genomes/all/GCF/004/343/625/GCF_004343625.1_ASM434362v1	ftp://ftp.ncbi.nlm.nih.gov/genomes/all/GCA/004/343/625/GCA_004343625.1_ASM434362v1	NHGRI	2019/03/11_00:00	2019/03/11_00:00	2019/03/11_00:00	2019/03/16_00:00	SAMN06921734	assembly	Enterobacter_spp	E_xiangfangensis	1	-		IncFIB_IncFII_repA	absent	absent	blaKPC-3	present
SAMN10976869	blood	Homo_sapiens	Bacteremia		Seattle_Children's_Hospital		GCF_004327755.2	ASM432775v2	Scaffold	NA	2011WA-NCV	SJED02	4884460	60	300244	158836	Enterobacter_hormaechei_(enterobacteria)	Enterobacter_hormaechei	ftp://ftp.ncbi.nlm.nih.gov/genomes/all/GCF/004/327/755/GCF_004327755.2_ASM432775v2	ftp://ftp.ncbi.nlm.nih.gov/genomes/all/GCA/004/327/755/GCA_004327755.2_ASM432775v2	Seattle_Children&apos;s_Hospital	2019/05/17_00:00	2019/05/17_00:00	2019/05/17_00:00	2019/05/21_00:00	SAMN10976869	assembly	Enterobacter_spp	E_xiangfangensis	1	426		IncFIB_IncFII	absent	absent	-	present
SAMEA104567417	faecal	Homo_sapiens					GCA_902158805.1	25426_7#17	Contig	NA	4928STDY7071307	CABGHO01	4884760	60	249697	550	Enterobacter_cloacae_(enterobacteria)	Enterobacter_cloacae	NA	ftp://ftp.ncbi.nlm.nih.gov/genomes/all/GCA/902/158/805/GCA_902158805.1_25426_7_17	SC	2019/07/08_00:00	2019/07/12_00:00	2019/07/12_00:00	2019/07/12_00:00	SAMEA104567417	assembly	Enterobacter_spp	E_xiangfangensis	2	286		IncFIB_IncFII	absent	absent	-	absent
SAMN02138629	urine	missing					GCF_000534455.1	Ente_cloa_BIDMC_8_V2	Scaffold	NA	BIDMC_8	JCLF01	4884990	15	550931	158836	Enterobacter_hormaechei_(enterobacteria)	Enterobacter_hormaechei	ftp://ftp.ncbi.nlm.nih.gov/genomes/all/GCF/000/534/455/GCF_000534455.1_Ente_cloa_BIDMC_8_V2	ftp://ftp.ncbi.nlm.nih.gov/genomes/all/GCA/000/534/455/GCA_000534455.1_Ente_cloa_BIDMC_8_V2	Broad_Institute	2014/02/03_00:00	2014/02/03_00:00	2014/02/03_00:00	2018/11/14_00:00	SAMN02138629	assembly	Enterobacter_spp	E_xiangfangensis	3	182		IncFIB_IncFII_repA	absent	absent	blaKPC-3	absent
SAMN03732690	bodily_fluid	Homo_sapiens			Vance_Fowler		GCF_001023215.1	ASM102321v1	Contig	NA	GN02232	LEEM01	4885342	53	331682	299766	Enterobacter_hormaechei_subsp._steigerwaltii_(enterobacteria)	Enterobacter_hormaechei	ftp://ftp.ncbi.nlm.nih.gov/genomes/all/GCF/001/023/215/GCF_001023215.1_ASM102321v1	ftp://ftp.ncbi.nlm.nih.gov/genomes/all/GCA/001/023/215/GCA_001023215.1_ASM102321v1	JCVI	2015/06/09_00:00	2015/06/09_00:00	2015/06/09_00:00	2016/06/24_00:00	SAMN03732690	assembly	Enterobacter_spp	E_xiangfangensis	1	45		IncFIB_IncFII_IncN2_IncN3	absent	absent	-	present
SAMN03333180	urine	Homo_sapiens	Not_available		missing		GCF_000958845.1	ASM95884v1	Scaffold	NA	MNCRE52	JZDD01	4885752	149	111591	158836	Enterobacter_hormaechei_(enterobacteria)	Enterobacter_hormaechei	ftp://ftp.ncbi.nlm.nih.gov/genomes/all/GCF/000/958/845/GCF_000958845.1_ASM95884v1	ftp://ftp.ncbi.nlm.nih.gov/genomes/all/GCA/000/958/845/GCA_000958845.1_ASM95884v1	University_of_Minnesota	2015/03/20_00:00	2015/03/20_00:00	2015/03/20_00:00	2019/01/07_00:00	SAMN03333180	assembly	Enterobacter_spp	E_xiangfangensis	3	171		FIA_IncFIA_IncX3	absent	absent	blaKPC-3	absent
SAMN06106832	blood	Homo_sapiens	missing	51	Nontombi_Mbelle		GCF_002416525.1	ASM241652v1	Contig	NA	ST-231:Ec009	NXIL01	4887666	446	208827	158836	Enterobacter_hormaechei_(enterobacteria)	Enterobacter_hormaechei	ftp://ftp.ncbi.nlm.nih.gov/genomes/all/GCF/002/416/525/GCF_002416525.1_ASM241652v1	ftp://ftp.ncbi.nlm.nih.gov/genomes/all/GCA/002/416/525/GCA_002416525.1_ASM241652v1	University_of_KwaZulu_Natal	2017/10/03_00:00	2017/10/03_00:00	2017/10/03_00:00	2019/01/07_00:00	SAMN06106832	assembly	Enterobacter_spp	E_xiangfangensis	3	231		FIA_IncFIA_IncR	absent	absent	-	absent
SAMEA2273166	blood	Homo_sapiens					GCF_900077135.1	12045_4#42	Scaffold	NA	e435	FKEC01	4887715	90	122132	550	Enterobacter_cloacae_(enterobacteria)	Enterobacter_cloacae	ftp://ftp.ncbi.nlm.nih.gov/genomes/all/GCF/900/077/135/GCF_900077135.1_12045_4_42	ftp://ftp.ncbi.nlm.nih.gov/genomes/all/GCA/900/077/135/GCA_900077135.1_12045_4_42	SC	2016/04/13_00:00	2016/05/09_00:00	2016/05/09_00:00	2016/05/14_00:00	SAMEA2273166	assembly	Enterobacter_spp	E_xiangfangensis	2	135		FIA_IncFIA_IncFIB	absent	absent	-	absent
SAMN03280194	missing	Homo_sapiens	missing	missing	missing	missing	GCF_001030225.1	Ente_spec_BIDMC92_V1	Scaffold	NA	BIDMC92	LETR01	4888079	7	3189867	1594172	Enterobacter_sp._BIDMC92_(enterobacteria)	Enterobacter_sp._BIDMC92	ftp://ftp.ncbi.nlm.nih.gov/genomes/all/GCF/001/030/225/GCF_001030225.1_Ente_spec_BIDMC92_V1	ftp://ftp.ncbi.nlm.nih.gov/genomes/all/GCA/001/030/225/GCA_001030225.1_Ente_spec_BIDMC92_V1	Broad_Institute	2015/06/22_00:00	2015/06/22_00:00	2015/06/22_00:00	2015/06/23_00:00	SAMN03280194	assembly	Enterobacter_spp	E_sichuanensis	#N/A	676		IncFIB_IncFII	absent	absent	-	present
SAMEA2273505	blood	Homo_sapiens					GCF_900076825.1	12082_4#64	Scaffold	NA	e2793	FKIR01	4888183	36	242532	550	Enterobacter_cloacae_(enterobacteria)	Enterobacter_cloacae	ftp://ftp.ncbi.nlm.nih.gov/genomes/all/GCF/900/076/825/GCF_900076825.1_12082_4_64	ftp://ftp.ncbi.nlm.nih.gov/genomes/all/GCA/900/076/825/GCA_900076825.1_12082_4_64	SC	2016/04/15_00:00	2016/05/09_00:00	2016/05/09_00:00	2016/05/14_00:00	SAMEA2273505	assembly	Enterobacter_spp	E_xiangfangensis	1	90		NA	absent	absent	-	present
SAMEA2273324	blood	Homo_sapiens					GCF_900075445.1	12082_4#46	Scaffold	NA	e1286	FJXW01	4888261	212	183315	550	Enterobacter_cloacae_(enterobacteria)	Enterobacter_cloacae	ftp://ftp.ncbi.nlm.nih.gov/genomes/all/GCF/900/075/445/GCF_900075445.1_12082_4_46	ftp://ftp.ncbi.nlm.nih.gov/genomes/all/GCA/900/075/445/GCA_900075445.1_12082_4_46	SC	2016/04/05_00:00	2016/04/06_00:00	2016/04/06_00:00	2016/04/12_00:00	SAMEA2273324	assembly	Enterobacter_spp	E_xiangfangensis	4	94		IncFIB_IncHI2A	absent	absent	-	present
SAMN03274147	soil						GCF_000818625.1	ASM81862v1	Contig	NA	6kgm	JXAE01	4889096	78	185604	550	Enterobacter_cloacae_(enterobacteria)	Enterobacter_cloacae	ftp://ftp.ncbi.nlm.nih.gov/genomes/all/GCF/000/818/625/GCF_000818625.1_ASM81862v1	ftp://ftp.ncbi.nlm.nih.gov/genomes/all/GCA/000/818/625/GCA_000818625.1_ASM81862v1	University_of_Malaya	2015/01/15_00:00	2015/01/15_00:00	2015/01/15_00:00	2015/01/20_00:00	SAMN03274147	assembly	Enterobacter_spp	E_cloacae	#N/A	673		NA	absent	absent	-	present
SAMN06040376							GCF_002919745.1	ASM291974v1	Contig	NA	ECNIH10	PQLB01	4889662	51	386132	2080666	Enterobacter_cloacae_complex_sp._ECNIH10_(enterobacteria)	Enterobacter_cloacae_complex_sp._ECNIH10	ftp://ftp.ncbi.nlm.nih.gov/genomes/all/GCF/002/919/745/GCF_002919745.1_ASM291974v1	ftp://ftp.ncbi.nlm.nih.gov/genomes/all/GCA/002/919/745/GCA_002919745.1_ASM291974v1	NIH	2018/02/06_00:00	2018/02/06_00:00	2018/02/06_00:00	2018/02/09_00:00	SAMN06040376	assembly	Enterobacter_spp	E_kobei	#N/A	191		IncL/M_IncN	absent	absent	blaKPC-2	present
SAMN03401404		Oryza_sativa					GCF_001475565.1	ASM147556v1	Contig	NA	NS188	LDQI01	4889753	62	254143	69218	Enterobacter_cancerogenus_(enterobacteria)	Enterobacter_cancerogenus	ftp://ftp.ncbi.nlm.nih.gov/genomes/all/GCF/001/475/565/GCF_001475565.1_ASM147556v1	ftp://ftp.ncbi.nlm.nih.gov/genomes/all/GCA/001/475/565/GCA_001475565.1_ASM147556v1	Bacterial_Genomics_and_Evolution_Laboratory,_CSIR-Institute_of_Microbial_Technology,_Sector_39-A,_Chandigarh,_India	2015/12/22_00:00	2015/12/22_00:00	2015/12/22_00:00	2015/12/23_00:00	SAMN03401404	assembly	Enterobacter_spp	E_cancerogenus	#N/A	-		NA	absent	absent	-	present
SAMN06040375							GCF_002919775.1	ASM291977v1	Contig	NA	ECNIH9	PQLC01	4890047	48	386132	2080667	Enterobacter_cloacae_complex_sp._ECNIH9_(enterobacteria)	Enterobacter_cloacae_complex_sp._ECNIH9	ftp://ftp.ncbi.nlm.nih.gov/genomes/all/GCF/002/919/775/GCF_002919775.1_ASM291977v1	ftp://ftp.ncbi.nlm.nih.gov/genomes/all/GCA/002/919/775/GCA_002919775.1_ASM291977v1	NIH	2018/02/06_00:00	2018/02/06_00:00	2018/02/06_00:00	2018/02/09_00:00	SAMN06040375	assembly	Enterobacter_spp	E_kobei	#N/A	191		IncL/M_IncN	absent	absent	blaKPC-2	present
SAMN05787340		NA					GCF_001875655.1	ASM187565v1	Scaffold	NA	ATCC_49162	MKEQ01	4890213	9	3831920	888063	Enterobacter_hormaechei_ATCC_49162_(enterobacteria)	Enterobacter_hormaechei	ftp://ftp.ncbi.nlm.nih.gov/genomes/all/GCF/001/875/655/GCF_001875655.1_ASM187565v1	ftp://ftp.ncbi.nlm.nih.gov/genomes/all/GCA/001/875/655/GCA_001875655.1_ASM187565v1	Zhejiang_Sci-Tech_University	2016/11/10_00:00	2016/11/10_00:00	2016/11/10_00:00	2016/11/27_00:00	SAMN05787340	assembly	Enterobacter_spp	E_hormaechei	#N/A	528	yes	IncFIB	absent	absent	-	absent
SAMEA2273439	blood	Homo_sapiens					GCF_900076425.1	12045_5#17	Scaffold	NA	e2090	FKBO01	4891491	69	182834	550	Enterobacter_cloacae_(enterobacteria)	Enterobacter_cloacae	ftp://ftp.ncbi.nlm.nih.gov/genomes/all/GCF/900/076/425/GCF_900076425.1_12045_5_17	ftp://ftp.ncbi.nlm.nih.gov/genomes/all/GCA/900/076/425/GCA_900076425.1_12045_5_17	SC	2016/04/13_00:00	2016/05/09_00:00	2016/05/09_00:00	2016/05/12_00:00	SAMEA2273439	assembly	Enterobacter_spp	E_xiangfangensis	2	78		IncFIB	absent	absent	-	absent
SAMN08519296	military_dog_fecal_sample	Canis_lupus_familiaris			J_Riehm		GCF_003321525.1	ASM332152v1	Contig	NA	GER_MD08_1505_Ecl_089	PUQG01	4891662	98	119571	158836	Enterobacter_hormaechei_(enterobacteria)	Enterobacter_hormaechei	ftp://ftp.ncbi.nlm.nih.gov/genomes/all/GCF/003/321/525/GCF_003321525.1_ASM332152v1	ftp://ftp.ncbi.nlm.nih.gov/genomes/all/GCA/003/321/525/GCA_003321525.1_ASM332152v1	Northern_Arizona_University	2018/07/15_00:00	2018/07/15_00:00	2018/07/15_00:00	2019/01/08_00:00	SAMN08519296	assembly	Enterobacter_spp	E_xiangfangensis	2	104		FIA_IncFIA_IncFIB_IncR	absent	absent	-	absent
SAMEA2273471	blood	Homo_sapiens					GCF_900077195.1	12045_5#51	Scaffold	NA	e473	FKEJ01	4891846	56	312304	550	Enterobacter_cloacae_(enterobacteria)	Enterobacter_cloacae	ftp://ftp.ncbi.nlm.nih.gov/genomes/all/GCF/900/077/195/GCF_900077195.1_12045_5_51	ftp://ftp.ncbi.nlm.nih.gov/genomes/all/GCA/900/077/195/GCA_900077195.1_12045_5_51	SC	2016/04/13_00:00	2016/05/09_00:00	2016/05/09_00:00	2016/05/14_00:00	SAMEA2273471	assembly	Enterobacter_spp	E_xiangfangensis	1	106		FIA_IncFIA_IncFIB	absent	absent	-	present
SAMEA2273494	blood	Homo_sapiens					GCF_900077385.1	12045_5#69	Scaffold	NA	e575	FKFD01	4891915	74	152805	550	Enterobacter_cloacae_(enterobacteria)	Enterobacter_cloacae	ftp://ftp.ncbi.nlm.nih.gov/genomes/all/GCF/900/077/385/GCF_900077385.1_12045_5_69	ftp://ftp.ncbi.nlm.nih.gov/genomes/all/GCA/900/077/385/GCA_900077385.1_12045_5_69	SC	2016/04/13_00:00	2016/05/09_00:00	2016/05/09_00:00	2016/05/14_00:00	SAMEA2273494	assembly	Enterobacter_spp	E_xiangfangensis	2	135		NA	present	absent	-	absent
SAMN09435823	blood_culture	Homo_sapiens	Not_available		French_National_Reference_Center_for_Antibiotic_Resistance		GCF_003289305.1	ASM328930v1	Scaffold	NA	136_E4	QMCT01	4892130	164	110703	1296536	Enterobacter_hormaechei_subsp._xiangfangensis_(enterobacteria)	Enterobacter_hormaechei	ftp://ftp.ncbi.nlm.nih.gov/genomes/all/GCF/003/289/305/GCF_003289305.1_ASM328930v1	ftp://ftp.ncbi.nlm.nih.gov/genomes/all/GCA/003/289/305/GCA_003289305.1_ASM328930v1	CHU_de_Bicetre	2018/07/06_00:00	2018/07/06_00:00	2018/07/06_00:00	2018/07/11_00:00	SAMN09435823	assembly	Enterobacter_spp	E_xiangfangensis	3	66		NA	absent	absent	-	absent
SAMN03732726	bodily_fluid	Homo_sapiens			Vance_Fowler		GCF_001022855.1	ASM102285v1	Contig	NA	GN02768	LEDF01	4892437	103	137255	1812934	Enterobacter_hormaechei_subsp._hoffmannii_(enterobacteria)	Enterobacter_hormaechei	ftp://ftp.ncbi.nlm.nih.gov/genomes/all/GCF/001/022/855/GCF_001022855.1_ASM102285v1	ftp://ftp.ncbi.nlm.nih.gov/genomes/all/GCA/001/022/855/GCA_001022855.1_ASM102285v1	JCVI	2015/06/09_00:00	2015/06/09_00:00	2015/06/09_00:00	2016/07/14_00:00	SAMN03732726	assembly	Enterobacter_spp	E_xiangfangensis	2	152		IncFIB_IncFII_IncQ2	absent	absent	-	absent
SAMN03732717	bodily_fluid	Homo_sapiens			Vance_Fowler		GCF_001022675.1	ASM102267v1	Contig	NA	GN02587	LEDN01	4892918	70	192277	2494701	Enterobacter_chengduensis_(Enterobacter_genomosp._L)	Enterobacter_chengduensis	ftp://ftp.ncbi.nlm.nih.gov/genomes/all/GCF/001/022/675/GCF_001022675.1_ASM102267v1	ftp://ftp.ncbi.nlm.nih.gov/genomes/all/GCA/001/022/675/GCA_001022675.1_ASM102267v1	JCVI	2015/06/09_00:00	2015/06/09_00:00	2015/06/09_00:00	2016/07/19_00:00	SAMN03732717	assembly	Enterobacter_spp	E_chengduensis	#N/A	-		IncFIB_IncFII_IncR	absent	absent	-	present
SAMN11514786	missing	Homo_sapiens	Unknown		Emerging_Pathogens_Institute		GCF_005217135.1	ASM521713v1	Contig	NA	MSP19	SZNJ01	4893685	234	60448	158836	Enterobacter_hormaechei_(enterobacteria)	Enterobacter_hormaechei	ftp://ftp.ncbi.nlm.nih.gov/genomes/all/GCF/005/217/135/GCF_005217135.1_ASM521713v1	ftp://ftp.ncbi.nlm.nih.gov/genomes/all/GCA/005/217/135/GCA_005217135.1_ASM521713v1	University_of_Florida	2019/05/06_00:00	2019/05/06_00:00	2019/05/06_00:00	2019/05/08_00:00	SAMN11514786	assembly	Enterobacter_spp	E_xiangfangensis	3	344		IncHI2_IncHI2A_IncX3	absent	absent	blaNDM-5	absent
SAMN04155457	sputum	Homo_sapiens	Pneumonia		Hong_Du		GCF_001487035.1	ASM148703v1	Scaffold	NA	SZECL	LKUI01	4893955	30	1154127	158836	Enterobacter_hormaechei_(enterobacteria)	Enterobacter_hormaechei	ftp://ftp.ncbi.nlm.nih.gov/genomes/all/GCF/001/487/035/GCF_001487035.1_ASM148703v1	ftp://ftp.ncbi.nlm.nih.gov/genomes/all/GCA/001/487/035/GCA_001487035.1_ASM148703v1	New_Jersey_Medical_School-Rutgers_University	2016/01/05_00:00	2016/01/05_00:00	2016/01/05_00:00	2019/01/07_00:00	SAMN04155457	assembly	Enterobacter_spp	E_xiangfangensis	3	231		IncA/C_IncA/C2_IncR_IncX6	absent	absent	blaNDM-1,blaKPC-3	absent
SAMEA2273393	blood	Homo_sapiens					GCF_900075985.1	12082_4#50	Scaffold	NA	e1635	FJZY01	4894705	75	201976	550	Enterobacter_cloacae_(enterobacteria)	Enterobacter_cloacae	ftp://ftp.ncbi.nlm.nih.gov/genomes/all/GCF/900/075/985/GCF_900075985.1_12082_4_50	ftp://ftp.ncbi.nlm.nih.gov/genomes/all/GCA/900/075/985/GCA_900075985.1_12082_4_50	SC	2016/04/05_00:00	2016/04/06_00:00	2016/04/06_00:00	2016/04/12_00:00	SAMEA2273393	assembly	Enterobacter_spp	E_xiangfangensis	1	141		IncFIB_IncFII	absent	absent	-	present
SAMN04014906	missing	missing	missing		missing		GCF_002055735.1	ASM205573v1	Complete_Genome	NA	AR_0065	NA	4894829	2	4825100	550	Enterobacter_cloacae_(enterobacteria)	Enterobacter_cloacae	ftp://ftp.ncbi.nlm.nih.gov/genomes/all/GCF/002/055/735/GCF_002055735.1_ASM205573v1	ftp://ftp.ncbi.nlm.nih.gov/genomes/all/GCA/002/055/735/GCA_002055735.1_ASM205573v1	Centers_for_Disease_Control_and_Prevention	2017/03/21_00:00	2017/03/21_00:00	2017/03/21_00:00	2017/03/23_00:00	SAMN04014906	assembly	Enterobacter_spp	E_xiangfangensis	1	50		IncR	absent	absent	-	present
SAMN10248993	alcohol_foam_dispenser_in_hospital_intensive_care_unit						GCF_003937295.1	ASM393729v1	Scaffold	NA	EH_316	RHUO01	4895089	88	140531	158836	Enterobacter_hormaechei_(enterobacteria)	Enterobacter_hormaechei	ftp://ftp.ncbi.nlm.nih.gov/genomes/all/GCF/003/937/295/GCF_003937295.1_ASM393729v1	ftp://ftp.ncbi.nlm.nih.gov/genomes/all/GCA/003/937/295/GCA_003937295.1_ASM393729v1	Washington_University_in_St._Louis_School_of_Medicine	2018/12/11_00:00	2018/12/12_00:00	2018/12/12_00:00	2018/12/14_00:00	SAMN10248993	assembly	Enterobacter_spp	E_hormaechei	#N/A	696		IncHI2_IncHI2A_IncN	absent	absent	blaNDM-1	absent
SAMN04572704	Unknown	Homo_sapiens	Bloodstream_infection		Vance_Fowler		GCF_001631925.1	ASM163192v1	Contig	NA	GN06275	LVVD01	4895171	102	207599	299766	Enterobacter_hormaechei_subsp._steigerwaltii_(enterobacteria)	Enterobacter_hormaechei	ftp://ftp.ncbi.nlm.nih.gov/genomes/all/GCF/001/631/925/GCF_001631925.1_ASM163192v1	ftp://ftp.ncbi.nlm.nih.gov/genomes/all/GCA/001/631/925/GCA_001631925.1_ASM163192v1	JCVI	2016/04/25_00:00	2016/04/25_00:00	2016/04/25_00:00	2016/04/26_00:00	SAMN04572704	assembly	Enterobacter_spp	E_xiangfangensis	1	106		NA	absent	absent	-	present
SAMN03283313	Unknown	Unknown	Unknown		Barry_Kreiswirth		GCF_000956655.1	ASM95665v1	Contig	NA	28940	LAAY01	4895687	40	322841	299766	Enterobacter_hormaechei_subsp._steigerwaltii_(enterobacteria)	Enterobacter_hormaechei	ftp://ftp.ncbi.nlm.nih.gov/genomes/all/GCF/000/956/655/GCF_000956655.1_ASM95665v1	ftp://ftp.ncbi.nlm.nih.gov/genomes/all/GCA/000/956/655/GCA_000956655.1_ASM95665v1	JCVI	2015/03/19_00:00	2015/03/19_00:00	2015/03/19_00:00	2016/06/23_00:00	SAMN03283313	assembly	Enterobacter_spp	E_xiangfangensis	1	133		IncFIB_IncN2_IncN3	absent	absent	-	absent
SAMN09435828	urine_sample	Homo_sapiens	Not_available		French_National_Reference_Center_for_Antibiotic_Resistance		GCF_003289195.1	ASM328919v1	Contig	NA	121J9	QMCO01	4896195	323	34967	208224	Enterobacter_kobei_(enterobacteria)	Enterobacter_kobei	ftp://ftp.ncbi.nlm.nih.gov/genomes/all/GCF/003/289/195/GCF_003289195.1_ASM328919v1	ftp://ftp.ncbi.nlm.nih.gov/genomes/all/GCA/003/289/195/GCA_003289195.1_ASM328919v1	CHU_de_Bicetre	2018/07/06_00:00	2018/07/06_00:00	2018/07/06_00:00	2018/07/11_00:00	SAMN09435828	assembly	Enterobacter_spp	E_kobei	#N/A	125		IncFIB	absent	absent	-	present
SAMN04252936	Unknown	Homo_sapiens	clinical_or_host-associated_bacteria	44_years	Johann_Pitout		GCF_001472845.1	SMART_855.v1	Contig	NA	SMART_855	LPOY01	4896352	100	117064	336306	Enterobacter_cloacae_subsp._cloacae_(enterobacteria)	Enterobacter_cloacae	ftp://ftp.ncbi.nlm.nih.gov/genomes/all/GCF/001/472/845/GCF_001472845.1_SMART_855.v1	ftp://ftp.ncbi.nlm.nih.gov/genomes/all/GCA/001/472/845/GCA_001472845.1_SMART_855.v1	JCVI	2015/12/21_00:00	2015/12/21_00:00	2015/12/21_00:00	2016/06/24_00:00	SAMN04252936	assembly	Enterobacter_spp	E_cloacae	#N/A	524		FIA_IncFIA_IncFIC_IncFII_IncN_IncR	absent	absent	blaNDM-1	present
SAMN03283619	Unknown	Unknown	Unknown		Barry_Kreiswirth		GCF_000957685.1	ASM95768v1	Contig	NA	35002	LAAD01	4896666	47	340811	299766	Enterobacter_hormaechei_subsp._steigerwaltii_(enterobacteria)	Enterobacter_hormaechei	ftp://ftp.ncbi.nlm.nih.gov/genomes/all/GCF/000/957/685/GCF_000957685.1_ASM95768v1	ftp://ftp.ncbi.nlm.nih.gov/genomes/all/GCA/000/957/685/GCA_000957685.1_ASM95768v1	JCVI	2015/03/19_00:00	2015/03/19_00:00	2015/03/19_00:00	2016/06/23_00:00	SAMN03283619	assembly	Enterobacter_spp	E_xiangfangensis	1	113		IncFIB_IncFII_IncL/M	absent	absent	blaKPC-3	present
SAMN03333170	Nephretic_drain_fluid	Homo_sapiens	Not_available		missing		GCF_001025045.1	ASM102504v1	Scaffold	NA	MNCRE81	LDEO01	4896880	243	62040	158836	Enterobacter_hormaechei_(enterobacteria)	Enterobacter_hormaechei	ftp://ftp.ncbi.nlm.nih.gov/genomes/all/GCF/001/025/045/GCF_001025045.1_ASM102504v1	ftp://ftp.ncbi.nlm.nih.gov/genomes/all/GCA/001/025/045/GCA_001025045.1_ASM102504v1	University_of_Minnesota	2015/06/10_00:00	2015/06/10_00:00	2015/06/10_00:00	2019/01/07_00:00	SAMN03333170	assembly	Enterobacter_spp	E_xiangfangensis	3	171		FIA_IncFIA_IncX3	absent	absent	blaKPC-3	absent
SAMN08290420	fecal_sample	Homo_sapiens	Colistin-resistant_commensal_bacteria		missing		GCF_003850715.1	ASM385071v1	Scaffold	NA	301B	PQTC01	4896944	86	187163	2079206	Enterobacter_sp._301B_(enterobacteria)	Enterobacter_sp._301B	ftp://ftp.ncbi.nlm.nih.gov/genomes/all/GCF/003/850/715/GCF_003850715.1_ASM385071v1	ftp://ftp.ncbi.nlm.nih.gov/genomes/all/GCA/003/850/715/GCA_003850715.1_ASM385071v1	University_of_Florence	2018/11/29_00:00	2018/11/29_00:00	2018/11/29_00:00	2018/12/01_00:00	SAMN08290420	assembly	Enterobacter_spp	E_xiangfangensis	2	168		FIA_IncFIA_IncI2	present	absent	-	absent
SAMN08357870		Homo_sapiens					GCF_002939185.1	ASM293918v1	Contig	NA	WCHECl1597	POVL01	4897201	204	71252	2071710	Enterobacter_sichuanensis_(enterobacteria)	Enterobacter_sichuanensis	ftp://ftp.ncbi.nlm.nih.gov/genomes/all/GCF/002/939/185/GCF_002939185.1_ASM293918v1	ftp://ftp.ncbi.nlm.nih.gov/genomes/all/GCA/002/939/185/GCA_002939185.1_ASM293918v1	West_China_Hospital,_Sichuan_University	2018/02/23_00:00	2018/02/23_00:00	2018/02/23_00:00	2018/02/27_00:00	SAMN08357870	assembly	Enterobacter_spp	E_sichuanensis	#N/A	-	yes	FIA_IncFIA_IncN	absent	absent	-	present
SAMN10995772		Homo_sapiens					GCF_004331265.1	ASM433126v1	Contig	NA	WCHEW120002	SJOO01	4897369	46	547377	2529381	Enterobacter_sp._WCHEs120002_(enterobacteria)	Enterobacter_sp._WCHEs120002	ftp://ftp.ncbi.nlm.nih.gov/genomes/all/GCF/004/331/265/GCF_004331265.1_ASM433126v1	ftp://ftp.ncbi.nlm.nih.gov/genomes/all/GCA/004/331/265/GCA_004331265.1_ASM433126v1	West_China_Hospital,_Sichuan_University	2019/03/06_00:00	2019/03/06_00:00	2019/03/06_00:00	2019/03/12_00:00	SAMN10995772	assembly	Enterobacter_spp	E_quasihormaechei	#N/A	-	yes	NA	absent	absent	-	present
SAMN07291525	missing	missing	missing		missing		GCF_003073995.1	ASM307399v1	Complete_Genome	NA	AR432	NA	4897845	3	4891057	158836	Enterobacter_hormaechei_(enterobacteria)	Enterobacter_hormaechei	ftp://ftp.ncbi.nlm.nih.gov/genomes/all/GCF/003/073/995/GCF_003073995.1_ASM307399v1	ftp://ftp.ncbi.nlm.nih.gov/genomes/all/GCA/003/073/995/GCA_003073995.1_ASM307399v1	FDA/CDC	2018/04/30_00:00	2018/04/30_00:00	2018/04/30_00:00	2018/05/02_00:00	SAMN07291525	assembly	Enterobacter_spp	E_xiangfangensis	1	106		NA	absent	absent	-	present
SAMN04431017	abdomen	Homo_sapiens	clinical_or_host-associated_bacteria	73_years	Johann_Pitout		GCF_001525405.1	ASM152540v1	Contig	NA	SMART_1169	LRIV01	4898290	81	266855	1296536	Enterobacter_hormaechei_subsp._xiangfangensis_(enterobacteria)	Enterobacter_hormaechei	ftp://ftp.ncbi.nlm.nih.gov/genomes/all/GCF/001/525/405/GCF_001525405.1_ASM152540v1	ftp://ftp.ncbi.nlm.nih.gov/genomes/all/GCA/001/525/405/GCA_001525405.1_ASM152540v1	JCVI	2016/01/22_00:00	2016/01/22_00:00	2016/01/22_00:00	2018/10/10_00:00	SAMN04431017	assembly	Enterobacter_spp	E_xiangfangensis	3	182		IncFIB_IncFII_IncL/M	absent	absent	-	absent
SAMEA2273190	blood	Homo_sapiens					GCF_900077355.1	12045_4#62	Scaffold	NA	e559	FKEZ01	4898563	64	185359	550	Enterobacter_cloacae_(enterobacteria)	Enterobacter_cloacae	ftp://ftp.ncbi.nlm.nih.gov/genomes/all/GCF/900/077/355/GCF_900077355.1_12045_4_62	ftp://ftp.ncbi.nlm.nih.gov/genomes/all/GCA/900/077/355/GCA_900077355.1_12045_4_62	SC	2016/04/13_00:00	2016/05/09_00:00	2016/05/09_00:00	2016/05/14_00:00	SAMEA2273190	assembly	Enterobacter_spp	E_xiangfangensis	4	108		Col440II_IncFIB	absent	absent	-	absent
SAMN05581750	missing	Homo_sapiens	missing		missing		GCF_001729805.1	ASM172980v1	Complete_Genome	NA	DSM_16690	NA	4899997	2	4748414	1812935	Enterobacter_roggenkampii_(enterobacteria)	Enterobacter_roggenkampii	ftp://ftp.ncbi.nlm.nih.gov/genomes/all/GCF/001/729/805/GCF_001729805.1_ASM172980v1	ftp://ftp.ncbi.nlm.nih.gov/genomes/all/GCA/001/729/805/GCA_001729805.1_ASM172980v1	JCVI	2016/09/16_00:00	2016/09/16_00:00	2016/09/16_00:00	2016/09/19_00:00	SAMN05581750	assembly	Enterobacter_spp	E_roggenkampii	#N/A	905	yes	NA	absent	absent	-	present
SAMN03283652	Unknown	Unknown	Unknown		Barry_Kreiswirth		GCF_000958165.1	ASM95816v1	Contig	NA	39379	JZYM01	4900749	75	132751	299766	Enterobacter_hormaechei_subsp._steigerwaltii_(enterobacteria)	Enterobacter_hormaechei	ftp://ftp.ncbi.nlm.nih.gov/genomes/all/GCF/000/958/165/GCF_000958165.1_ASM95816v1	ftp://ftp.ncbi.nlm.nih.gov/genomes/all/GCA/000/958/165/GCA_000958165.1_ASM95816v1	JCVI	2015/03/19_00:00	2015/03/20_00:00	2015/03/20_00:00	2016/06/23_00:00	SAMN03283652	assembly	Enterobacter_spp	E_xiangfangensis	1	170		IncFIB_IncFII_IncL/M	absent	absent	blaKPC-2	present
SAMEA2273433	blood	Homo_sapiens					GCF_900076355.1	12045_5#11	Scaffold	NA	e2024	FKBJ01	4900805	74	183702	550	Enterobacter_cloacae_(enterobacteria)	Enterobacter_cloacae	ftp://ftp.ncbi.nlm.nih.gov/genomes/all/GCF/900/076/355/GCF_900076355.1_12045_5_11	ftp://ftp.ncbi.nlm.nih.gov/genomes/all/GCA/900/076/355/GCA_900076355.1_12045_5_11	SC	2016/04/13_00:00	2016/05/09_00:00	2016/05/09_00:00	2016/05/14_00:00	SAMEA2273433	assembly	Enterobacter_spp	E_xiangfangensis	4	108		IncFIB_IncFII	absent	absent	-	absent
SAMD00089487		Homo_sapiens					GCF_002334125.1	ASM233412v1	Scaffold	NA	TUM10694	BEFH01	4901054	126	79948	158836	Enterobacter_hormaechei_(enterobacteria)	Enterobacter_hormaechei	ftp://ftp.ncbi.nlm.nih.gov/genomes/all/GCF/002/334/125/GCF_002334125.1_ASM233412v1	ftp://ftp.ncbi.nlm.nih.gov/genomes/all/GCA/002/334/125/GCA_002334125.1_ASM233412v1	Toho_University	2017/08/28_00:00	2017/09/21_00:00	2017/09/21_00:00	2017/09/23_00:00	SAMD00089487	assembly	Enterobacter_spp	E_xiangfangensis	2	78		IncFIB_IncW	absent	absent	blaIMP-1	absent
SAMN03455972							GCF_002206605.1	ASM220660v1	Contig	NA	ECNIH6	NAVE01	4901303	75	276202	1971395	Enterobacter_cloacae_complex_sp._ECNIH6_(enterobacteria)	Enterobacter_cloacae_complex_sp._ECNIH6	ftp://ftp.ncbi.nlm.nih.gov/genomes/all/GCF/002/206/605/GCF_002206605.1_ASM220660v1	ftp://ftp.ncbi.nlm.nih.gov/genomes/all/GCA/002/206/605/GCA_002206605.1_ASM220660v1	NHGRI	2017/06/23_00:00	2017/06/23_00:00	2017/06/23_00:00	2017/06/28_00:00	SAMN03455972	assembly	Enterobacter_spp	E_kobei	#N/A	191		IncL/M_IncN	absent	absent	blaKPC-2	present
SAMN09064920	Seed	Raphanus_sativus_var._Flamboyant_5			Preveaux_A.		GCF_005233655.1	ASM523365v1	Contig	NA	CFBP13530	QGAL01	4901530	37	706600	69218	Enterobacter_cancerogenus_(enterobacteria)	Enterobacter_cancerogenus	ftp://ftp.ncbi.nlm.nih.gov/genomes/all/GCF/005/233/655/GCF_005233655.1_ASM523365v1	ftp://ftp.ncbi.nlm.nih.gov/genomes/all/GCA/005/233/655/GCA_005233655.1_ASM523365v1	INRA	2019/05/07_00:00	2019/05/07_00:00	2019/05/07_00:00	2019/05/10_00:00	SAMN09064920	assembly	Enterobacter_spp	E_cancerogenus	#N/A	-		NA	absent	absent	-	present
SAMEA2273259	blood	Homo_sapiens					GCF_900077965.1	11983_7#34	Scaffold	NA	e880	FKHK01	4901758	60	210411	550	Enterobacter_cloacae_(enterobacteria)	Enterobacter_cloacae	ftp://ftp.ncbi.nlm.nih.gov/genomes/all/GCF/900/077/965/GCF_900077965.1_11983_7_34	ftp://ftp.ncbi.nlm.nih.gov/genomes/all/GCA/900/077/965/GCA_900077965.1_11983_7_34	SC	2016/04/13_00:00	2016/05/09_00:00	2016/05/09_00:00	2016/05/13_00:00	SAMEA2273259	assembly	Enterobacter_spp	E_xiangfangensis	2	78		IncFIB_IncFII_IncR	absent	absent	-	absent
SAMN10249130	nursing_call_button_in_hospital_intensive_care_unit						GCF_003936565.1	ASM393656v1	Scaffold	NA	EH_057	RHUR01	4901897	86	124596	158836	Enterobacter_hormaechei_(enterobacteria)	Enterobacter_hormaechei	ftp://ftp.ncbi.nlm.nih.gov/genomes/all/GCF/003/936/565/GCF_003936565.1_ASM393656v1	ftp://ftp.ncbi.nlm.nih.gov/genomes/all/GCA/003/936/565/GCA_003936565.1_ASM393656v1	Washington_University_in_St._Louis_School_of_Medicine	2018/12/11_00:00	2018/12/12_00:00	2018/12/12_00:00	2018/12/14_00:00	SAMN10249130	assembly	Enterobacter_spp	E_xiangfangensis	2	-		IncFIB_IncFII_IncN	absent	absent	-	absent
SAMN10753727	soil						GCF_004296595.1	ASM429659v1	Scaffold	NA	A8	SCMF01	4902693	22	794235	2507249	Enterobacter_sp._A8_(enterobacteria)	Enterobacter_sp._A8	ftp://ftp.ncbi.nlm.nih.gov/genomes/all/GCF/004/296/595/GCF_004296595.1_ASM429659v1	ftp://ftp.ncbi.nlm.nih.gov/genomes/all/GCA/004/296/595/GCA_004296595.1_ASM429659v1	University_of_Chicago	2019/02/25_00:00	2019/02/25_00:00	2019/02/25_00:00	2019/02/27_00:00	SAMN10753727	assembly	Enterobacter_spp	E_cloacae	#N/A	-		NA	absent	absent	-	present
SAMN02869885	tongue	Homo_sapiens					GCF_000710795.1	De_novo_Assembly	Contig	NA	T1-1	JALW01	4903249	142	83203	1449966	Enterobacter_sp._T1-1_(enterobacteria)	Enterobacter_sp._T1-1	ftp://ftp.ncbi.nlm.nih.gov/genomes/all/GCF/000/710/795/GCF_000710795.1_De_novo_Assembly	ftp://ftp.ncbi.nlm.nih.gov/genomes/all/GCA/000/710/795/GCA_000710795.1_De_novo_Assembly	University_of_Malaya	2014/06/23_00:00	2014/06/23_00:00	2014/06/23_00:00	2014/10/09_00:00	SAMN02869885	assembly	Enterobacter_spp	E_cloacae	#N/A	739		NA	absent	absent	-	present
SAMEA2273367	blood	Homo_sapiens					GCF_900075795.1	11983_6#48	Scaffold	NA	e1518	FJZG01	4903719	93	129790	550	Enterobacter_cloacae_(enterobacteria)	Enterobacter_cloacae	ftp://ftp.ncbi.nlm.nih.gov/genomes/all/GCF/900/075/795/GCF_900075795.1_11983_6_48	ftp://ftp.ncbi.nlm.nih.gov/genomes/all/GCA/900/075/795/GCA_900075795.1_11983_6_48	SC	2016/04/05_00:00	2016/04/06_00:00	2016/04/06_00:00	2016/04/18_00:00	SAMEA2273367	assembly	Enterobacter_spp	E_xiangfangensis	4	108		IncFIB_IncFII	absent	absent	-	absent
SAMEA2273181	blood	Homo_sapiens					GCF_900077265.1	12045_4#55	Scaffold	NA	e513	FKEP01	4903750	58	208580	550	Enterobacter_cloacae_(enterobacteria)	Enterobacter_cloacae	ftp://ftp.ncbi.nlm.nih.gov/genomes/all/GCF/900/077/265/GCF_900077265.1_12045_4_55	ftp://ftp.ncbi.nlm.nih.gov/genomes/all/GCA/900/077/265/GCA_900077265.1_12045_4_55	SC	2016/04/13_00:00	2016/05/09_00:00	2016/05/09_00:00	2016/05/14_00:00	SAMEA2273181	assembly	Enterobacter_spp	E_xiangfangensis	2	286		IncFIB_IncFII	absent	absent	-	absent
SAMD00089488		Homo_sapiens					GCF_002334145.1	ASM233414v1	Scaffold	NA	TUM10695	BEFI01	4903818	130	102987	158836	Enterobacter_hormaechei_(enterobacteria)	Enterobacter_hormaechei	ftp://ftp.ncbi.nlm.nih.gov/genomes/all/GCF/002/334/145/GCF_002334145.1_ASM233414v1	ftp://ftp.ncbi.nlm.nih.gov/genomes/all/GCA/002/334/145/GCA_002334145.1_ASM233414v1	Toho_University	2017/08/28_00:00	2017/09/21_00:00	2017/09/21_00:00	2017/09/23_00:00	SAMD00089488	assembly	Enterobacter_spp	E_xiangfangensis	2	78		IncFIB	absent	absent	blaIMP-1	absent
SAMN08623807	bloodstream	Homo_sapiens	bacterial_infectious_disease		Stanford_Healthcare_Clinical_Microbiology_Laboratory		GCF_003400765.1	ASM340076v1	Contig	NA	CRE33	PXKS01	4903893	217	227794	158836	Enterobacter_hormaechei_(enterobacteria)	Enterobacter_hormaechei	ftp://ftp.ncbi.nlm.nih.gov/genomes/all/GCF/003/400/765/GCF_003400765.1_ASM340076v1	ftp://ftp.ncbi.nlm.nih.gov/genomes/all/GCA/003/400/765/GCA_003400765.1_ASM340076v1	Stanford_Healthcare	2018/08/16_00:00	2018/08/16_00:00	2018/08/16_00:00	2018/08/21_00:00	SAMN08623807	assembly	Enterobacter_spp	E_xiangfangensis	1	204		IncFIB_IncFII	absent	absent	-	present
SAMEA2273380	blood	Homo_sapiens					GCF_900075875.1	11983_6#60	Scaffold	NA	e1562	FJZM01	4903953	81	149205	550	Enterobacter_cloacae_(enterobacteria)	Enterobacter_cloacae	ftp://ftp.ncbi.nlm.nih.gov/genomes/all/GCF/900/075/875/GCF_900075875.1_11983_6_60	ftp://ftp.ncbi.nlm.nih.gov/genomes/all/GCA/900/075/875/GCA_900075875.1_11983_6_60	SC	2016/04/05_00:00	2016/04/06_00:00	2016/04/06_00:00	2016/04/12_00:00	SAMEA2273380	assembly	Enterobacter_spp	E_xiangfangensis	2	168		FIA_IncFIA_IncFIB_IncFII	absent	absent	-	absent
SAMD00089486		Homo_sapiens					GCF_002334105.1	ASM233410v1	Scaffold	NA	TUM10693	BEFG01	4903977	83	130974	158836	Enterobacter_hormaechei_(enterobacteria)	Enterobacter_hormaechei	ftp://ftp.ncbi.nlm.nih.gov/genomes/all/GCF/002/334/105/GCF_002334105.1_ASM233410v1	ftp://ftp.ncbi.nlm.nih.gov/genomes/all/GCA/002/334/105/GCA_002334105.1_ASM233410v1	Toho_University	2017/08/28_00:00	2017/09/21_00:00	2017/09/21_00:00	2017/09/23_00:00	SAMD00089486	assembly	Enterobacter_spp	E_xiangfangensis	2	78		IncFIB_IncW	absent	absent	blaIMP-1	absent
SAMN03283646	Unknown	Unknown	Unknown		Barry_Kreiswirth		GCF_000958145.1	ASM95814v1	Contig	NA	39366	JZYO01	4904114	115	144882	1296536	Enterobacter_hormaechei_subsp._xiangfangensis_(enterobacteria)	Enterobacter_hormaechei	ftp://ftp.ncbi.nlm.nih.gov/genomes/all/GCF/000/958/145/GCF_000958145.1_ASM95814v1	ftp://ftp.ncbi.nlm.nih.gov/genomes/all/GCA/000/958/145/GCA_000958145.1_ASM95814v1	JCVI	2015/03/19_00:00	2015/03/20_00:00	2015/03/20_00:00	2018/10/10_00:00	SAMN03283646	assembly	Enterobacter_spp	E_xiangfangensis	3	231		FIA_IncFIA_IncFII_IncL/M_IncR	absent	absent	blaNDM-1	absent
SAMN03333176	urine	Homo_sapiens	Not_available		missing		GCF_000958765.1	ASM95876v1	Scaffold	NA	MNCRE56	JZCZ01	4904230	240	69924	158836	Enterobacter_hormaechei_(enterobacteria)	Enterobacter_hormaechei	ftp://ftp.ncbi.nlm.nih.gov/genomes/all/GCF/000/958/765/GCF_000958765.1_ASM95876v1	ftp://ftp.ncbi.nlm.nih.gov/genomes/all/GCA/000/958/765/GCA_000958765.1_ASM95876v1	University_of_Minnesota	2015/03/20_00:00	2015/03/20_00:00	2015/03/20_00:00	2019/01/07_00:00	SAMN03333176	assembly	Enterobacter_spp	E_xiangfangensis	3	171		FIA_IncFIA_IncX3	absent	absent	blaKPC-3	absent
SAMN03743787		not_applicable					GCF_001029645.1	ASM102964v1	Complete_Genome	NA	UW5	NA	4904981	1	4904981	299767	Enterobacter_ludwigii_(enterobacteria)	Enterobacter_ludwigii	ftp://ftp.ncbi.nlm.nih.gov/genomes/all/GCF/001/029/645/GCF_001029645.1_ASM102964v1	ftp://ftp.ncbi.nlm.nih.gov/genomes/all/GCA/001/029/645/GCA_001029645.1_ASM102964v1	University_of_New_Brunswick	2015/06/19_00:00	2015/06/19_00:00	2015/06/19_00:00	2019/03/07_00:00	SAMN03743787	assembly	Enterobacter_spp	E_ludwigii	#N/A	-		NA	absent	absent	-	present
SAMN03012824	bodily_fluid	Homo_sapiens	bloodstream_infection		Knutson		GCF_000802865.1	SPADES_assembly_of_Enterobacter_cloacae_NDB	Contig	NA	NDB	JUIE01	4905714	77	150391	1296536	Enterobacter_hormaechei_subsp._xiangfangensis_(enterobacteria)	Enterobacter_hormaechei	ftp://ftp.ncbi.nlm.nih.gov/genomes/all/GCF/000/802/865/GCF_000802865.1_SPADES_assembly_of_Enterobacter_cloacae_NDB	ftp://ftp.ncbi.nlm.nih.gov/genomes/all/GCA/000/802/865/GCA_000802865.1_SPADES_assembly_of_Enterobacter_cloacae_NDB	JCVI	2014/12/16_00:00	2014/12/16_00:00	2014/12/16_00:00	2016/06/15_00:00	SAMN03012824	assembly	Enterobacter_spp	E_xiangfangensis	3	171		FIA_IncFIA_IncX3_IncX4	absent	absent	blaKPC-3	absent
SAMD00089483		Homo_sapiens					GCF_002334045.1	ASM233404v1	Scaffold	NA	TUM10690	BEFD01	4905897	149	119318	158836	Enterobacter_hormaechei_(enterobacteria)	Enterobacter_hormaechei	ftp://ftp.ncbi.nlm.nih.gov/genomes/all/GCF/002/334/045/GCF_002334045.1_ASM233404v1	ftp://ftp.ncbi.nlm.nih.gov/genomes/all/GCA/002/334/045/GCA_002334045.1_ASM233404v1	Toho_University	2017/08/28_00:00	2017/09/21_00:00	2017/09/21_00:00	2017/09/23_00:00	SAMD00089483	assembly	Enterobacter_spp	E_xiangfangensis	2	78		IncFIB_IncW	absent	absent	blaIMP	absent
SAMN02952953	Loktak_Lake						GCF_000733275.2	ASM73327v2	Contig	NA	EGD-HP1	AVOP01	4906112	36	292564	1357268	Enterobacter_sp._EGD-HP1_(enterobacteria)	Enterobacter_sp._EGD-HP1	ftp://ftp.ncbi.nlm.nih.gov/genomes/all/GCF/000/733/275/GCF_000733275.2_ASM73327v2	ftp://ftp.ncbi.nlm.nih.gov/genomes/all/GCA/000/733/275/GCA_000733275.2_ASM73327v2	National_Environmental_Engineering_Research_Institute-CSIR	2014/07/24_00:00	2015/10/29_00:00	2015/10/29_00:00	2015/10/31_00:00	SAMN02952953	assembly	Enterobacter_spp	Unidentified-4	#N/A	713		IncFII	absent	absent	-	present
SAMN04407777	Unknown	Homo_sapiens	Bloodstream_infection		Vance_Fowler		GCF_001518285.1	ASM151828v1	Contig	NA	GN03667	LRCJ01	4906814	104	87729	61645	Enterobacter_asburiae_(enterobacteria)	Enterobacter_asburiae	ftp://ftp.ncbi.nlm.nih.gov/genomes/all/GCF/001/518/285/GCF_001518285.1_ASM151828v1	ftp://ftp.ncbi.nlm.nih.gov/genomes/all/GCA/001/518/285/GCA_001518285.1_ASM151828v1	JCVI	2016/01/19_00:00	2016/01/19_00:00	2016/01/19_00:00	2016/06/27_00:00	SAMN04407777	assembly	Enterobacter_spp	E_asburiae	#N/A	24		IncFIB_IncFII_pENTAS02	absent	absent	-	present
SAMN03277192	excreted_bodily_substance	Homo_sapiens			CIDEIM		GCF_000965825.1	ASM96582v1	Contig	NA	CIDEIMsCOL5	JZKP01	4907054	167	84394	61645	Enterobacter_asburiae_(enterobacteria)	Enterobacter_asburiae	ftp://ftp.ncbi.nlm.nih.gov/genomes/all/GCF/000/965/825/GCF_000965825.1_ASM96582v1	ftp://ftp.ncbi.nlm.nih.gov/genomes/all/GCA/000/965/825/GCA_000965825.1_ASM96582v1	JCVI	2015/03/30_00:00	2015/03/30_00:00	2015/03/30_00:00	2016/06/27_00:00	SAMN03277192	assembly	Enterobacter_spp	E_asburiae	#N/A	27		NA	present	absent	blaKPC-2	present
SAMEA2273385	blood	Homo_sapiens					GCF_900075905.1	11983_6#65	Scaffold	NA	e1587	FJZQ01	4907545	63	208468	550	Enterobacter_cloacae_(enterobacteria)	Enterobacter_cloacae	ftp://ftp.ncbi.nlm.nih.gov/genomes/all/GCF/900/075/905/GCF_900075905.1_11983_6_65	ftp://ftp.ncbi.nlm.nih.gov/genomes/all/GCA/900/075/905/GCA_900075905.1_11983_6_65	SC	2016/04/05_00:00	2016/04/06_00:00	2016/04/06_00:00	2016/04/12_00:00	SAMEA2273385	assembly	Enterobacter_spp	E_xiangfangensis	2	78		IncFIB	absent	absent	-	absent
SAMD00089473		Homo_sapiens					GCF_002333845.1	ASM233384v1	Scaffold	NA	TUM10679	BEET01	4908158	164	82506	158836	Enterobacter_hormaechei_(enterobacteria)	Enterobacter_hormaechei	ftp://ftp.ncbi.nlm.nih.gov/genomes/all/GCF/002/333/845/GCF_002333845.1_ASM233384v1	ftp://ftp.ncbi.nlm.nih.gov/genomes/all/GCA/002/333/845/GCA_002333845.1_ASM233384v1	Toho_University	2017/08/28_00:00	2017/09/21_00:00	2017/09/21_00:00	2017/09/23_00:00	SAMD00089473	assembly	Enterobacter_spp	E_xiangfangensis	2	78		IncFIB_IncW	absent	absent	blaIMP-1	absent
SAMD00089472		Homo_sapiens					GCF_002333825.1	ASM233382v1	Scaffold	NA	TUM10678	BEES01	4908519	136	90604	158836	Enterobacter_hormaechei_(enterobacteria)	Enterobacter_hormaechei	ftp://ftp.ncbi.nlm.nih.gov/genomes/all/GCF/002/333/825/GCF_002333825.1_ASM233382v1	ftp://ftp.ncbi.nlm.nih.gov/genomes/all/GCA/002/333/825/GCA_002333825.1_ASM233382v1	Toho_University	2017/08/28_00:00	2017/09/21_00:00	2017/09/21_00:00	2017/09/23_00:00	SAMD00089472	assembly	Enterobacter_spp	E_xiangfangensis	2	78		IncFIB_IncW	absent	absent	blaIMP-1	absent
SAMEA104113918							GCF_900185895.1	Enterobacter_ludwigii_DSM16688T_ERS788666	Contig	Enterobacter_ludwigii_DSM16688T		FYBD01	4908609	26	544330	299767	Enterobacter_ludwigii_(enterobacteria)	Enterobacter_ludwigii	ftp://ftp.ncbi.nlm.nih.gov/genomes/all/GCF/900/185/895/GCF_900185895.1_Enterobacter_ludwigii_DSM16688T_ERS788666	ftp://ftp.ncbi.nlm.nih.gov/genomes/all/GCA/900/185/895/GCA_900185895.1_Enterobacter_ludwigii_DSM16688T_ERS788666	JUSTUS_LIEBIG_UNIVERSITY	2017/06/15_00:00	2017/06/16_00:00	2017/06/16_00:00	2017/06/21_00:00	SAMEA104113918	assembly	Enterobacter_spp	E_ludwigii	#N/A	714		NA	absent	absent	-	present
SAMN03333181	sputum	Homo_sapiens	Not_available		missing		GCF_000958925.1	ASM95892v1	Scaffold	NA	MNCRE9	JZDE01	4908651	72	214669	158836	Enterobacter_hormaechei_(enterobacteria)	Enterobacter_hormaechei	ftp://ftp.ncbi.nlm.nih.gov/genomes/all/GCF/000/958/925/GCF_000958925.1_ASM95892v1	ftp://ftp.ncbi.nlm.nih.gov/genomes/all/GCA/000/958/925/GCA_000958925.1_ASM95892v1	University_of_Minnesota	2015/03/20_00:00	2015/03/20_00:00	2015/03/20_00:00	2019/01/07_00:00	SAMN03333181	assembly	Enterobacter_spp	E_xiangfangensis	3	171		FIA_IncFIA_IncX3	absent	absent	blaKPC-3	absent
SAMD00115686		Homo_sapiens					GCF_003175745.1	ASM317574v1	Contig	NA	TUM1506	BGLG01	4908689	73	306662	550	Enterobacter_cloacae_(enterobacteria)	Enterobacter_cloacae	ftp://ftp.ncbi.nlm.nih.gov/genomes/all/GCF/003/175/745/GCF_003175745.1_ASM317574v1	ftp://ftp.ncbi.nlm.nih.gov/genomes/all/GCA/003/175/745/GCA_003175745.1_ASM317574v1	Toho_University	2018/05/25_00:00	2018/05/29_00:00	2018/05/29_00:00	2018/05/31_00:00	SAMD00115686	assembly	Enterobacter_spp	E_xiangfangensis	1	90		IncFIB_IncFII	absent	absent	-	present
SAMEA3138380							GCF_000210775.1	ASM21077v1	Chromosome	NA	NCTC_9394	NA	4908759	427	15976	718254	Enterobacter_cloacae_subsp._cloacae_NCTC_9394_(enterobacteria)	Enterobacter_cloacae	ftp://ftp.ncbi.nlm.nih.gov/genomes/all/GCF/000/210/775/GCF_000210775.1_ASM21077v1	ftp://ftp.ncbi.nlm.nih.gov/genomes/all/GCA/000/210/775/GCA_000210775.1_ASM21077v1	metaHIT	2010/04/23_00:00	2011/04/26_00:00	2011/04/26_00:00	2015/03/23_00:00	SAMEA3138380	assembly	Enterobacter_spp	E_xiangfangensis	1	4		IncFIB_IncFII	absent	absent	-	present
SAMN03198179	missing	Homo_sapiens	missing		UW_clinical_laboratory		GCF_001059905.1	ASM105990v1	Scaffold	NA	959_ECLO	JULZ01	4908781	102	119025	299766	Enterobacter_hormaechei_subsp._steigerwaltii_(enterobacteria)	Enterobacter_hormaechei	ftp://ftp.ncbi.nlm.nih.gov/genomes/all/GCF/001/059/905/GCF_001059905.1_ASM105990v1	ftp://ftp.ncbi.nlm.nih.gov/genomes/all/GCA/001/059/905/GCA_001059905.1_ASM105990v1	University_of_Washington	2015/07/10_00:00	2015/07/10_00:00	2015/07/10_00:00	2016/07/19_00:00	SAMN03198179	assembly	Enterobacter_spp	E_xiangfangensis	1	50		IncFIB_IncFII	absent	absent	-	present
SAMN04431002	urine	Homo_sapiens	clinical_or_host-associated_bacteria	98_years	Johann_Pitout		GCF_001526015.1	ASM152601v1	Contig	NA	SMART_1342	LRJK01	4909094	66	311695	1296536	Enterobacter_hormaechei_subsp._xiangfangensis_(enterobacteria)	Enterobacter_hormaechei	ftp://ftp.ncbi.nlm.nih.gov/genomes/all/GCF/001/526/015/GCF_001526015.1_ASM152601v1	ftp://ftp.ncbi.nlm.nih.gov/genomes/all/GCA/001/526/015/GCA_001526015.1_ASM152601v1	JCVI	2016/01/22_00:00	2016/01/22_00:00	2016/01/22_00:00	2018/10/10_00:00	SAMN04431002	assembly	Enterobacter_spp	E_xiangfangensis	3	182		IncFIB_IncFII_IncX3	absent	absent	blaNDM-1	absent
SAMEA2273149	blood	Homo_sapiens					GCF_900076925.1	12045_4#26	Scaffold	NA	e318	FKDN01	4910245	69	143589	550	Enterobacter_cloacae_(enterobacteria)	Enterobacter_cloacae	ftp://ftp.ncbi.nlm.nih.gov/genomes/all/GCF/900/076/925/GCF_900076925.1_12045_4_26	ftp://ftp.ncbi.nlm.nih.gov/genomes/all/GCA/900/076/925/GCA_900076925.1_12045_4_26	SC	2016/04/13_00:00	2016/05/09_00:00	2016/05/09_00:00	2016/05/14_00:00	SAMEA2273149	assembly	Enterobacter_spp	E_xiangfangensis	2	233		IncHI2_IncHI2A_IncR	present	absent	-	absent
SAMN03732715	bodily_fluid	Homo_sapiens			Vance_Fowler		GCF_001022615.1	ASM102261v1	Contig	NA	GN02555	LEDO01	4911226	86	237885	299766	Enterobacter_hormaechei_subsp._steigerwaltii_(enterobacteria)	Enterobacter_hormaechei	ftp://ftp.ncbi.nlm.nih.gov/genomes/all/GCF/001/022/615/GCF_001022615.1_ASM102261v1	ftp://ftp.ncbi.nlm.nih.gov/genomes/all/GCA/001/022/615/GCA_001022615.1_ASM102261v1	JCVI	2015/06/09_00:00	2015/06/09_00:00	2015/06/09_00:00	2016/06/24_00:00	SAMN03732715	assembly	Enterobacter_spp	E_xiangfangensis	1	234		IncFIB_IncFII	absent	absent	-	present
[truncated: 976 more rows]

## Sheet: SRA
Orig_#	BioSample	strain	collection_date	geographic_location	isolation_source	host	host_disease	host_age	collected_by	serovar	SRA	BioSample	Run	bases	avgLength	size_MB	LibrarySource	LibraryLayout	Platform	Model	BioSample	Coverage	Assembly_size	Enterobacter_spp	OGRI_based_species_(ANI>95%)	lineage	MLST	plasmid_replicon	mcr-9	mcr-10	Carbapenemases	arnBCADTEF
[truncated: 1,544 more rows]

[truncated: 1 more sheets: summary]
