# Supplementary material for: Resolving colistin resistance and heteroresistance in Enterobacter species
Source: Research Square preprint supplement (doi:10.21203/rs.3.rs-1894580/v1), 2022-08-03
Supplement: Supplementary file 4 [file 8fdd58bdec9f7c1383a44227.xlsx]

## Sheet: Sheet1
							First-reclassification			Second-reclassifcation
Sr. No.	OGRI-based valid Enterobacter Species	Genus	species	Type_strain	Accessions	Reference	Genus	species	Ref	Genus	species	Ref	Year
1	yes	Enterobacter	cloacae	ATCC 13047	CP001918/NC_014121	Hormaeche and Edwards, 1960							Pathogenic
2	no	Enterobacter	aerogenes	ATCC 13048		Hormaeche and Edwards, 1960	Klebsiella	mobilis					Pathogenic
3	no	Enterobacter	liquefaciens	ATCC 27592		Ewing. 1963	Serratia	liquefaciens	Ewing et al., 1973				Pathogenic
4	no	Enterobacter	hafniae	ATCC 13337		Ewing and Fife, 1968	Hafnia	alvei					Pathogenic
5	no	Enterobacter	agglomerans	ATCC 27155		Ewing and Fife, 1972	Pantonea	aglomerans	Gavini et al., 1989	Enterobacter	agglomerans	Tindall, 2014*	Pathogenic
6	no	Enterobacter	gergoviae	ATCC33028		Brenner et al., 1980	Pluralibcter	gergoviae	Brady et al., 2013				Pathogenic
7	no	Enterobacter	sakazakii	ATCC 29544		Farmer et al., 1980	Cronobacter	sakazakii	Iversen et al., 2007				Pathogenic
8	no	Enterobacter	amnigenus	ATCC 33072		Gavini et al., 1981	Lelliottia	amnigenus	Brady et al., 2013				Pathogenic
9	no	Enterobacter	taylorae	ATCC 35317		Farmer et al., 1985	Enterobacter	cancerogenus	Schonheyder et al., 1994				Pathogenic
10	no	Enterobacter	intermedium	ATCC 33110		Izard et al., 1980	Enterobacter	intermedius	Gavenitz, 1990	Kluyvera	intermedia	Pavan et al. 2005	Pathogenic
11	yes	Enterobacter	asburiae	ATCC 35953	CP011863	Brenner et al., 1986							Pathogenic
12	no	Enterobacter	dissolvans	ATCC 23373	WJWQ00000000	Brenner et al., 1986	Enterobacter	cloacae subsp. dissolvans	Hoffman et al., 2005				Pathogenic
13	no	Enterobacter	nimipressuralis	CIP 104980		Brenner et al., 1986	Lelliottia	nimipressuralis	Brady et al., 2013				Pathogenic
14	yes	Enterobacter	cancerogenus	ATCC 33241	NZ_FYBA00000000	Dickey and Zumoff, 1988							Pathogenic
15	yes	Enterobacter	hormaechei	ATCC 49162	MKEQ00000000	O'hara et al, 1989							Pathogenic
16	no	Enterobacter	pyrinus	ATCC 49851		Chung et al., 1993	Pluralibcter	pyrinus	Brady et al., 2013				Plant pathogen
17	yes	Enterobacter	kobei	DSM 13645	CP017181	Kosako et al., 1996							Pathogenic
18	no	Enterobacter	cowanii	CCUG 45998		Inoue et al., 2000	Kosakonia	cowanii	Brady et al., 2013				Pathogenic
19	yes	Enterobacter	ludwigii	EN-119	CP017279	Hoffmann et al., 2005							Pathogenic
20	no	Enterobacter	radicincitans	CCUG 50898		Kampfer et al., 2005	Kosakonia	radicincitans	Brady et al., 2013				Plant pathogen
21	no	Enterobacter	turicensis	DSM 18397		Stephen et al., 2007	Cronobacter	turicensis	Brady et al., 2013	Siccibacter	turicensis	Stephen et al., 2014	Pathogenic
22	no	Enterobacter	helveticus	JCM 16470		Stephen et al., 2007	Cronobacter	heleveticus	Brady et al., 2013	Franconibacter	helveticus	Stephen et al., 2014	? Food
23	no	Enterobacter	pulveris	LMG 24057		Stephen et al., 2008	Cronobacter	pulveris	Brady et al., 2013	Franconibacter	pulveris	Stephen et al., 2014	? Food
24	no	Enterobacter	oryzae	LMG 24251		Peng et al., 2009	Kosakonia	oryzae	Brady et al., 2013				environmental
25	no	Enterobacter	arachidis	DSM 25165		Madhaiyan et al., 2010	Kosakonia	arachidis	Brady et al., 2013				environmental
26	yes	Enterobacter	mori	LMG 25706	AEXB00000000	Zhu et al., 2011							Plant pathogen
27	yes	Enterobacter	soli	ATCC BAA-2102	LXES00000000	Manter et al., 2011							environmental
28	no	Enterobacter	massiliensis	DSM 26120		Lagier et al., 2013	Pseudescherichia	massiliensis	Alnajar et al., 2017	Metakosakonia		Alnajar et al., 2017	? Normal intestinal flora
29	no	Enterobacter	oryziphilus	LMG 26432		Hardoim et al., 2013	Kosakonia	oryziphilus	Li et al., 2016	NOT VALIDATED			environmental
30	no	Enterobacter	oryzendophyticus	LMG 26432		Hardoim et al., 2013	Kosakonia	oryzendophyticus	Li et al., 2016	NOT VALIDATED			environmental
31	no	Enterobacter	sacchari	LMG 26783		Zhu et al., 2013	Kosakonia	sacchari	Gu et al, 2014				environmental
32	no	Enterobacter	siamensis	KCTC 23282		Khunthongpan et al., 2013	Not a valid species		Kaempfer et al., 2016				environmental
33	yes	Enterobacter	xiangfangensis	LMG27195	CP017183	Gu et al., 2014							food
34	no	Enterobacter	lignolyticus	SCF1		DeAngelis et al., 2011	Pluralibacter	lignolyticus	Alnajar et al., 2017				environmental
35	no	Enterobacter	nickellidurans	LMG23000		Bhadra et al., 2011	Not validy published						environmental
36	no	Enterobacter	muelleri	JM-458	FXLQ00000000	Kampfer et al., 2015	Enterobacter	asburiae					environmental
37	yes	Enterobacter	bugandensis	EB-247	FYBI00000000	Doijad et al, 2015							Pathogenic
38	yes	Enterobacter	tabaci	YIM Hb-3	QZDQ00000000	Duan et al., 2015	Enterobacter	mori	Wu and Zong 2019				environmental
39	yes	Enterobacter	timonensis	mt20	FCOP00000000	Alou et al., 2017	Pseduoenterobacter	timonensis	Wu et al. 2020				Healthy-human-gut
40	yes	Enterobacter	chengduensis	WCHECl-C4	MTSO00000000	Wu et al., 2018	yet to validate
41	yes	Enterobacter	sichuanensis	WCHECL1597	POVL00000000	Wu et al., 2018
42	yes	Enterobacter	roggenkampii	EN-117	CP017184.1	Sutton et al., 2018	yet to validate
43	yes	Enterobacter	huaxiensis	90008	QZCT00000000	Wu et al., 2019
44	yes	Enterobacter	chuandaensis	90028	QZCS00000000	Wu et al., 2019
45	yes	Enterobacter	oligotrophica	CCA6	AP019007	Akita et al., 2019
46	yes	Enterobacter	wuhouensis	WCHEs120002	SJOO00000000	Wang et al., 2019
47	yes	Enterobacter	quasihormaechei	WCHEs120003	SJON00000000	Wang et al., 2019
48	yes	Enterobacter	quasimori	90044	RXSJ00000000	Wu et al. 2020
49	yes	Enterobacter	quasiroggenkampii	CCA6	LFDQ02000002.1	Wu et al. 2020
50	yes	Enterobacter	vonholyi	DSM 110788	VTUC00000000.1	Cho et al., 2021
51	yes	Enterobacter	dykesii	DSM 111347	NZ_VTTY00000000.1	Cho et al., 2021
