# Supplementary material for: Resolving colistin resistance and heteroresistance in Enterobacter species
Source: Research Square preprint supplement (doi:10.21203/rs.3.rs-1894580/v1), 2022-08-03
Supplement: Supplementary file 6 [file b0472653b76d72ca58c4ebf6.xlsx]

## Sheet: (a)list of 504 isolates
Isolates	Location	Year of Isolation	Source	This_study	PIPERACILLIN	PIPERACILLIN	CEFOTAXIM	CEFOTAXIM	CEFTAZIDIM	CEFTAZIDIM	CIPROFLOXAZIN	CIPROFLOXAZIN	GENTAMICIN	GENTAMICIN	COTRIMOXAZOL	COTRIMOXAZOL	ERTAPENEM	ERTAPENEM	IMIPENEM	IMIPENEM	MEROPENEM	MEROPENEM
RBK-16-0066-1	Cologne	2016	bloodstream	no	ND		S	<=1	S	<=1	S	<=0.25	S	<=1	S	<=20	S	<=0.5	S	<=0.25	S	<=0.25
RBK-16-0078-3	Cologne	2016	bloodstream	yes	R	>=128	R	>=64	R	>=64	S	<=0.25	S	<=1	S	<=20	S	<=0.5	S	<=0.25	S	<=0.25
RBK-16-0078-2	Cologne	2016	bloodstream	no	S	<=4	S	<=1	S	<=1	S	<=0.25	S	<=1	S	<=20	S	<=0.5	S	<=0.25	S	<=0.25
RBK-16-0091-1	Cologne	2016	bloodstream	no	S	<=4	S	<=1	S	<=1	S	<=0.25	S	<=1	S	<=20	S	<=0.5	S	<=0.25	S	<=0.25
RBK-18-0251-1	Cologne	2018	bloodstream	no	S	<=4	S	<=1	S	<=1	S	<=0.25	S	<=1	S	<=20	S	<=0.5	S	<=0.25	S	<=0.25
RBK-18-0264-1	Cologne	2019	bloodstream	yes	R	>=128	R	>=64	R	>=64	S	<=0.25	S	<=1	S	<=20	R	4	S	<=0.25	S	<=0.25
RBK-17-0221-2	Cologne	2017	bloodstream	yes	R	64	R	32	R	>=64	R	1	S	<=1	R	>=320	S	<=0.5	S	<=0.25	S	<=0.25
RBK-17-0230-1	Cologne	2017	bloodstream	yes	R	>=128	R	>=64	R	32	S	<=0.25	S	<=1	S	<=20	R	>=8	S	1	S	2
RBK-18-0410-1	Cologne	2018	bloodstream	no	S	<=4	S	<=1	S	<=1	S	<=0.25	S	<=1	S	<=20	S	<=0.5	S	0.5	S	<=0.25
RBK-17-0497-1	Cologne	2017	bloodstream	yes	R	>=128	R	>=64	R	>=64	R	2	S	4	R	>=320	R	>=8	I	8	R	99999
RBK-18-0004-1	Cologne	2018	bloodstream	no	S	<=4	S	<=1	S	<=1	S	<=0.25	S	<=1	S	<=20	S	<=0.5	S	<=0.25	S	<=0.25
RBK-18-0004-2	Cologne	2018	bloodstream	no	R	64	R	>=64	R	16	S	<=0.25	S	<=1	S	<=20	R	4	S	1	S	<=0.25
RBK-18-0008-1	Cologne	2018	bloodstream	no	S	<=4	S	<=1	S	<=1	S	<=0.25	S	<=1	S	<=20	S	<=0.5	S	<=0.25	S	<=0.25
RBK-18-0043-1	Cologne	2018	bloodstream	no	S	<=4	S	<=1	S	<=1	S	<=0.25	S	<=1	S	<=20	S	<=0.5	S	<=0.25	S	<=0.25
RBk-18-0188-1	Cologne	2018	bloodstream	no	I	16	R	8	R	4	S	<=0.25	S	<=1	S	<=20	S	<=0.5	S	<=0.25	S	<=0.25
RBk-18-0208-1	Cologne	2018	bloodstream	yes	R	>=128	R	>=64	R	>=64	S	<=0.25	S	<=1	S	<=20	I	1	S	<=0.25	S	<=0.25
RBK-18-0222-2	Cologne	2018	bloodstream	no	S	<=4	S	<=1	S	<=1	S	<=0.25	S	<=1	S	<=20	S	<=0.5	S	<=0.25	S	<=0.25
RBK-17-0132-1	Cologne	2017	bloodstream	no	S	<=4	S	<=1	S	<=1	S	<=0.25	S	<=1	S	<=20	S	<=0.5	S	0.5	S	<=0.25
RBK-17-0143-1	Cologne	2017	bloodstream	no	S	<=4	S	<=1	S	<=1	S	<=0.25	S	<=1	R	>=320	S	<=0.5	S	2	S	<=0.25
RBK-18-0379-1	Cologne	2018	bloodstream	no	S	<=4	S	<=1	S	<=1	S	<=0.25	S	<=1	S	<=20	S	<=0.5	S	<=0.25	S	<=0.25
RBK-18-0386-2	Cologne	2018	bloodstream	yes	R	99999	R	99999	R	99999	R	99999	S	99999	R	99999	ND		R	99999	R	99999
RBK-18-0386-1	Cologne	2018	bloodstream	no	R	99999	R	99999	R	99999	R	99999	S	99999	R	99999	ND		S	2	S	99999
RBK-18-0571-1	Cologne	2018	bloodstream	no	S	<=4	S	<=1	S	<=1	S	<=0.25	S	<=1	S	<=20	S	<=0.5	S	<=0.25	S	<=0.25
RBK-18-0580-2	Cologne	2018	bloodstream	no	R	>=128	R	>=64	R	>=64	S	<=0.25	S	<=1	S	<=20	S	<=0.5	S	1	S	<=0.25
RBK-18-0580-1	Cologne	2018	bloodstream	no	S	<=4	S	<=1	S	<=1	S	<=0.25	S	<=1	S	<=20	S	<=0.5	S	1	S	<=0.25
RBK-18-0606-1	Cologne	2018	bloodstream	no	S	<=4	S	<=1	S	<=1	S	<=0.25	S	<=1	S	<=20	S	<=0.5	S	2	S	<=0.25
RBK-17-0375-1	Cologne	2017	bloodstream	yes	R	>=128	R	>=64	R	>=64	S	<=0.25	S	<=1	S	<=20	S	<=0.5	S	0.5	S	<=0.25
RBK-17-0394-2	Cologne	2017	bloodstream	no	ND		R	16	R	4	S	<=0.25	S	<=1	S	<=20	S	<=0.5	S	0.5	S	<=0.25
RBK-17-0394-1	Cologne	2017	bloodstream	yes	R	>=128	R	>=64	R	>=64	S	<=0.25	R	2	S	<=20	R	>=8	ND		I	99999
RBK-17-0398-1	Cologne	2017	bloodstream	yes	R	>=128	R	>=64	R	>=64	S	<=0.25	S	<=1	S	<=20	R	4	S	<=0.25	S	<=0.25
RBK-17-0399-1	Cologne	2017	bloodstream	yes	R	>=128	R	>=64	R	>=64	S	<=0.25	S	<=1	S	<=20	R	4	S	<=0.25	S	<=0.25
RBK-17-0634-1	Cologne	2017	bloodstream	no	ND		S	<=1	S	<=1	S	<=0.25	S	<=1	S	<=20	S	<=0.5	S	<=0.25	S	<=0.25
RBK-17-0634-2	Cologne	2017	bloodstream	no	ND		R	>=64	R	32	S	<=0.25	S	<=1	S	<=20	S	<=0.5	S	<=0.25	S	<=0.25
RBK-17-0648-2	Cologne	2017	bloodstream	no	S	<=4	S	<=1	S	<=1	S	<=0.25	S	<=1	S	<=20	S	<=0.5	S	2	S	<=0.25
RBK-17-0651-1	Cologne	2017	bloodstream	no	S	<=4	S	<=1	S	<=1	S	<=0.25	S	<=1	S	<=20	S	<=0.5	S	<=0.25	S	<=0.25
RBK-17-0659-2	Cologne	2017	bloodstream	no	S	<=4	S	<=1	S	<=1	S	<=0.25	S	<=1	S	<=20	S	1	S	<=0.25	S	<=0.25
RBK-16-0045-1	Cologne	2016	bloodstream	no	S	<=4	S	<=1	S	<=1	S	<=0.25	S	<=1	S	<=20	S	<=0.5	S	0.5	S	<=0.25
RBK-17-0074-1	Cologne	2017	bloodstream	no	S	<=4	S	<=1	S	<=1	S	<=0.25	S	<=1	S	<=20	S	<=0.5	S	<=0.25	S	<=0.25
RBK-18-0141-1	Cologne	2018	bloodstream	yes	I	8	R	>=64	R	<=1	S	<=0.25	R	4	R	>=320	R	2	R	2	S	4
RBK-18-0142-1	Cologne	2018	bloodstream	no	S	<=4	S	<=1	S	<=1	S	<=0.25	S	<=1	S	<=20	S	<=0.5	S	<=0.25	S	<=0.25
RBK-18-0142-2	Cologne	2018	bloodstream	no	R	>=128	R	>=64	R	>=64	S	<=0.25	S	<=1	S	<=20	R	2	S	0.5	S	<=0.25
RBK-18-0340-1	Cologne	2018	bloodstream	no	S	<=4	S	<=1	S	<=1	S	<=0.25	S	<=1	S	<=20	S	<=0.5	S	0.5	S	<=0.25
RBK-18-0359-1	Cologne	2018	bloodstream	no	S	<=4	S	<=1	S	<=1	S	<=0.25	S	<=1	S	<=20	S	<=0.5	S	<=0.25	S	<=0.25
RBK-18-0362-1	Cologne	2018	bloodstream	no	S	<=4	S	<=1	S	<=1	S	<=0.25	S	<=1	S	<=20	S	<=0.5	S	0.5	S	<=0.25
RBK-17-0314-2	Cologne	2017	bloodstream	no	I	<=4	S	<=1	S	<=1	S	<=0.25	S	<=1	S	<=20	S	<=0.5	S	<=0.25	S	<=0.25
RBK-17-0314-1	Cologne	2017	bloodstream	no	S	<=4	S	<=1	S	<=1	S	<=0.25	S	<=1	S	<=20	S	<=0.5	S	0.5	S	<=0.25
RBK-17-0344-1	Cologne	2017	bloodstream	no	ND		S	<=1	S	<=1	S	<=0.25	S	<=1	S	<=20	S	<=0.5	S	2	S	<=0.25
RBK-17-0344-2	Cologne	2017	bloodstream	yes	ND		R	>=64	R	>=64	S	<=0.25	S	<=1	S	<=20	S	<=0.5	I	4	S	0.5
RBK-17-0346-3	Cologne	2017	bloodstream	no	S	<=4	S	<=1	S	<=1	S	<=0.25	S	<=1	S	<=20	S	<=0.5	S	0.5	S	<=0.25
RBK-18-0543-1	Cologne	2018	bloodstream	no	R	>=128	R	>=64	R	>=64	R	1	S	<=1	S	<=20	ND		S	<=0.25	S	<=0.25
RBK-17-0230-4	Cologne	2017	bloodstream	no	ND		R	>=64	R	>=64	S	<=0.25	S	<=1	S	<=20	R	>=8	I	99999	R	8
RBK-17-0429-2	Cologne	2017	bloodstream	no	S	<=4	S	<=1	S	<=1	S	<=0.25	S	<=1	S	<=20	S	<=0.5	S	0.5	S	<=0.25
RBK-17-0450-1	Cologne	2017	bloodstream	no	S	8	S	<=1	S	<=1	S	<=0.25	S	<=1	S	<=20	S	<=0.5	S	<=0.25	S	<=0.25
RBK-17-0466-1	Cologne	2017	bloodstream	no	S	<=4	S	<=1	S	<=1	S	<=0.25	S	<=1	S	<=20	S	<=0.5	S	0.5	S	<=0.25
RBK-17-0596-2	Cologne	2017	bloodstream	no	ND		R	32	R	>=64	S	<=0.25	S	<=1	S	<=20	S	<=0.5	S	<=0.25	S	<=0.25
RBK-17-0596-1	Cologne	2017	bloodstream	no	S	<=4	S	<=1	S	<=1	S	<=0.25	S	<=1	S	<=20	S	<=0.5	S	2	S	<=0.25
RBK-18-0621-2	Cologne	2018	bloodstream	no	S	<=4	S	<=1	S	<=1	S	<=0.25	S	<=1	S	<=20	S	<=0.5	S	<=0.25	S	<=0.25
RBK-18-0623-2	Cologne	2018	bloodstream	no	R	>=128	R	>=64	R	>=64	S	<=0.25	S	<=1	S	<=20	ND		S	0.5	S	99999
RBK-18-0623-1	Cologne	2018	bloodstream	no	S	<=4	S	<=1	S	<=1	S	<=0.25	S	<=1	S	<=20	S	<=0.5	S	1	S	<=0.25
RBK-17-0014-2	Cologne	2017	bloodstream	yes	R	32	R	8	R	8	S	<=0.25	R	2	S	<=20	R	4	S	2	S	99999
RBK-17-0014-1	Cologne	2017	bloodstream	no	S	<=4	S	<=1	S	<=1	S	<=0.25	S	<=1	S	<=20	S	<=0.5	S	99999	S	<=0.25
RBK-16-0148-1	Cologne	2016	bloodstream	no	S	<=4	S	<=1	S	<=1	S	<=0.25	S	<=1	S	<=20	S	<=0.5	S	0.5	S	<=0.25
RBK-18-0329-1	Cologne	2018	bloodstream	no	S	<=4	S	<=1	S	<=1	S	<=0.25	S	<=1	S	<=20	S	<=0.5	S	<=0.25	S	<=0.25
RBK-18-0329-2	Cologne	2018	bloodstream	no	R	>=128	R	32	R	>=64	S	<=0.25	S	<=1	S	<=20	S	<=0.5	S	<=0.25	S	<=0.25
RBK-18-0334-1	Cologne	2018	bloodstream	no	S	<=4	S	<=1	S	<=1	S	<=0.25	S	<=1	S	<=20	S	<=0.5	S	<=0.25	S	<=0.25
RBK-18-0336-1	Cologne	2018	bloodstream	no	S	<=4	S	<=1	S	<=1	S	<=0.25	S	<=1	S	<=20	S	<=0.5	S	<=0.25	S	<=0.25
RBK-17-0267-1	Cologne	2017	bloodstream	no	S	<=4	S	<=1	S	<=1	S	<=0.25	S	<=1	S	<=20	S	<=0.5	S	0.5	S	<=0.25
RBK-17-0294-1	Cologne	2017	bloodstream	no	S	<=4	S	<=1	S	<=1	S	<=0.25	S	<=1	S	<=20	S	<=0.5	S	1	S	<=0.25
RBK-17-0305-1	Cologne	2017	bloodstream	yes	ND		R	>=64	R	>=64	S	<=0.25	S	<=1	S	<=20	S	<=0.5	S	0.5	S	<=0.25
RBK-18-0445-1	Cologne	2018	bloodstream	no	S	<=4	S	<=1	S	<=1	S	<=0.25	S	<=1	S	<=20	S	<=0.5	S	0.5	S	<=0.25
RBK-18-0478-1	Cologne	2018	bloodstream	no	S	<=4	S	<=1	S	<=1	S	<=0.25	S	<=1	S	<=20	S	<=0.5	S	<=0.25	S	<=0.25
RBK-17-0549-2	Cologne	2017	bloodstream	no	R	>=128	R	>=64	R	>=64	S	<=0.25	S	<=1	S	<=20	R	2	S	0.5	S	<=0.25
RBK-17-0549-1	Cologne	2017	bloodstream	no	S	<=4	S	<=1	S	<=1	S	<=0.25	S	<=1	S	<=20	S	<=0.5	S	0.5	S	<=0.25
RBK-17-0559-1	Cologne	2017	bloodstream	no	S	8	S	<=1	S	<=1	S	<=0.25	S	<=1	S	<=20	S	<=0.5	S	1	S	<=0.25
RBK-17-0563-1	Cologne	2017	bloodstream	no	S	<=4	S	<=1	S	<=1	S	<=0.25	S	<=1	S	<=20	S	<=0.5	S	0.5	S	<=0.25
RBK-17-0573-1	Cologne	2017	bloodstream	no	R	>=128	R	>=64	R	>=64	S	<=0.25	S	<=1	S	<=20	I	1	S	<=0.25	S	<=0.25
RBK-18-0065-1	Cologne	2018	bloodstream	no	S	<=4	S	<=1	S	<=1	S	<=0.25	S	<=1	S	<=20	S	<=0.5	S	<=0.25	S	<=0.25
RBK-18-0110-1	Cologne	2018	bloodstream	no	S	8	S	<=1	S	<=1	R	>=4	S	<=1	S	<=20	S	<=0.5	S	<=0.25	S	<=0.25
RBK-18-0121-1	Cologne	2018	bloodstream	no	S	<=4	S	<=1	S	<=1	S	<=0.25	S	<=1	S	<=20	S	<=0.5	S	0.5	S	<=0.25
RBK-18-0078-1	Cologne	2018	bloodstream	no	S	<=4	S	<=1	S	<=1	S	<=0.25	S	<=1	S	<=20	S	<=0.5	S	<=0.25	S	<=0.25
RBT-17-0231-1	Tuebingen	2017	bloodstream	no	S	<=4	S	<=1	S	<=1	S	<=0.25	S	<=1	S	<=20	ND		S	1	S	<=0.25
RBT-17-0246-1	Tuebingen	2017	bloodstream	no	S	8	S	2	S	2	S	1	S	<=1	S	<=20	S	99999	S	<=0.25	S	<=0.25
RBT-17-0191-1	Tuebingen	2017	bloodstream	no	S	<=4	S	<=1	S	<=1	S	<=0.25	S	<=1	S	<=20	ND		S	0.5	S	<=0.25
RBT-17-0182-1	Tuebingen	2017	bloodstream	no	S	99999	S	99999	S	99999	S	99999	S	99999	S	99999	ND		ND		S	99999
RBT-17-0264-2	Tuebingen	2017	bloodstream	no	R	>=128	R	>=64	R	32	S	<=0.25	S	<=1	S	<=20	S	99999	S	<=0.25	S	<=0.25
RBT-17-0299-1	Tuebingen	2017	bloodstream	no	R	>=128	R	>=64	R	>=64	R	>=4	S	<=1	S	<=20	R	99999	S	<=0.25	S	<=0.25
RBT-17-0314-1	Tuebingen	2017	bloodstream	no	S	<=4	S	<=1	S	<=1	S	<=0.25	S	<=1	S	<=20	ND		S	<=0.25	S	<=0.25
RBT-17-0292-1	Tuebingen	2017	bloodstream	no	R	>=128	R	>=64	R	>=64	R	>=4	S	<=1	S	<=20	R	99999	S	99999	S	99999
RBT-17-0322-1	Tuebingen	2017	bloodstream	no	S	99999	S	<=1	S	<=1	S	<=0.25	S	<=1	S	<=20	ND		S	<=0.25	S	<=0.25
RBT-16-0105-1	Tuebingen	2016	bloodstream	no	R	>=128	R	>=64	R	>=64	S	<=0.25	S	<=1	S	<=20	R	99999	S	<=0.25	S	99999
RBT-17-0047-1	Tuebingen	2017	bloodstream	no	S	<=4	S	<=1	S	<=1	S	<=0.25	S	<=1	S	<=20	ND		S	1	S	<=0.25
RBT-17-0055-1	Tuebingen	2017	bloodstream	no	S	<=4	S	<=1	S	<=1	S	<=0.25	S	<=1	S	<=20	ND		S	1	S	<=0.25
RBT-17-0048-1	Tuebingen	2017	bloodstream	no	R	>=128	R	>=64	R	>=64	S	<=0.25	S	<=1	S	<=20	ND		S	<=0.25	S	<=0.25
RBT-18-0114-1	Tuebingen	2018	bloodstream	no	S	99999	S	99999	ND		S	99999	S	99999	S	99999	ND		ND		S	99999
RBT-18-0144-1	Tuebingen	2018	bloodstream	no	S	99999	S	99999	S	99999	S	99999	S	99999	S	99999	ND		ND		S	99999
RBT-18-0154-1	Tuebingen	2018	bloodstream	no	S	<=4	S	<=1	S	<=1	S	<=0.25	S	<=1	S	<=20	ND		S	0.5	S	<=0.25
RBT-18-0162-1	Tuebingen	2018	bloodstream	no	S	<=4	S	<=1	S	<=1	S	<=0.25	S	<=1	S	<=20	ND		S	<=0.25	S	<=0.25
RBT-18-0165-1	Tuebingen	2018	bloodstream	no	S	<=4	S	<=1	S	<=1	S	<=0.25	S	<=1	S	<=20	ND		S	<=0.25	S	<=0.25
RBT-17-0179-1	Tuebingen	2017	bloodstream	no	R	>=128	R	>=64	R	>=64	S	<=0.25	S	<=1	S	<=20	S	99999	S	<=0.25	S	<=0.25
RBT-17-0148-1	Tuebingen	2017	bloodstream	no	S	8	S	<=1	S	<=1	S	<=0.25	S	<=1	S	<=20	ND		S	<=0.25	S	<=0.25
RBT-16-0078-1	Tuebingen	2016	bloodstream	no	S	<=4	S	<=1	S	<=1	S	<=0.25	S	<=1	S	<=20	ND		S	<=0.25	S	<=0.25
RBT-18-0081-1	Tuebingen	2018	bloodstream	no	S	<=4	S	<=1	S	<=1	S	<=0.25	S	<=1	S	<=20	ND		S	2	S	<=0.25
RBT-17-0032-1	Tuebingen	2017	bloodstream	no	S	8	S	<=1	S	<=1	S	<=0.25	S	<=1	S	40	ND		S	<=0.25	S	<=0.25
RBT-17-0334-1	Tuebingen	2017	bloodstream	no	S	<=4	S	<=1	S	<=1	S	<=0.25	S	<=1	S	<=20	ND		S	<=0.25	S	<=0.25
RBT-18-0026-1	Tuebingen	2018	bloodstream	no	S	<=4	S	<=1	S	<=1	S	<=0.25	S	<=1	S	<=20	ND		S	1	S	<=0.25
RBT-18-0015-1	Tuebingen	2018	bloodstream	no	S	<=4	S	<=1	S	<=1	S	<=0.25	S	<=1	S	<=20	ND		S	<=0.25	S	<=0.25
RBT-17-0089-1	Tuebingen	2017	bloodstream	no	S	<=4	S	<=1	S	<=1	I	1	S	<=1	S	<=20	ND		S	0.5	S	<=0.25
RBT-18-0182-1	Tuebingen	2018	bloodstream	no	S	<=4	S	<=1	S	<=1	S	<=0.25	S	<=1	S	<=20	ND		S	<=0.25	S	<=0.25
RBT-18-0194-1	Tuebingen	2018	bloodstream	no	I	99999	I	99999	S	99999	S	99999	S	99999	S	99999	I	99999	S	99999	S	99999
RBT-18-0212-1	Tuebingen	2018	bloodstream	no	S	99999	I	99999	I	99999	S	99999	S	99999	S	99999	ND		ND		S	99999
RBT-17-0261-1	Tuebingen	2017	bloodstream	no	S	8	S	<=1	S	<=1	S	99999	S	<=1	S	<=20	ND		S	<=0.25	S	0.5
RBT-17-0101-1	Tuebingen	2017	bloodstream	no	S	<=4	S	<=1	S	<=1	S	<=0.25	S	<=1	S	<=20	ND		S	<=0.25	S	<=0.25
RBT-18-0040-1	Tuebingen	2018	bloodstream	no	S	<=4	S	<=1	S	<=1	S	<=0.25	S	<=1	S	<=20	ND		S	99999	S	<=0.25
RBF-17-0228-2	Freiburg	2017	bloodstream	no	S	<=4	S	<=1	S	<=1	S	<=0.25	S	<=1	S	<=20	S	<=0.5	S	<=0.25	S	<=0.25
RBF-17-0230-1	Freiburg	2017	bloodstream	no	S	<=4	S	<=1	S	<=1	S	<=0.25	S	<=1	S	<=20	S	<=0.5	S	<=0.25	S	<=0.25
RBF-17-0231-1	Freiburg	2017	bloodstream	no	S	<=4	S	<=1	S	<=1	S	<=0.25	S	<=1	S	<=20	S	<=0.5	S	<=0.25	S	<=0.25
RBF-17-0253-1	Freiburg	2017	bloodstream	no	S	<=4	S	<=1	S	<=1	S	<=0.25	S	<=1	S	<=20	S	<=0.5	S	<=0.25	S	<=0.25
RBF-17-0256-1	Freiburg	2017	bloodstream	yes	R	>=128	R	>=64	R	>=64	R	>=4	R	>=16	R	>=320	R	>=8	R	99999	R	99999
RBF-18-0551-1	Freiburg	2018	bloodstream	no	S	99999	S	<=1	S	<=1	S	<=0.25	S	<=1	S	<=20	S	<=0.5	S	<=0.25	S	<=0.25
RBF-18-0564-2	Freiburg	2018	bloodstream	no	ND		S	<=1	S	<=1	S	<=0.25	S	<=1	S	<=20	S	<=0.5	S	<=0.25	S	<=0.25
RBF-16-0034-1	Freiburg	2016	bloodstream	no	S	<=4	S	<=1	S	<=1	S	<=0.25	S	<=1	S	<=20	S	<=0.5	S	<=0.25	S	<=0.25
RBF-16-0042-1	Freiburg	2016	bloodstream	yes	R	>=128	R	>=64	R	>=64	S	<=0.25	S	<=1	S	<=20	S	<=0.5	S	<=0.25	S	<=0.25
RBF-16-0044-1	Freiburg	2016	bloodstream	no	S	<=4	S	<=1	S	<=1	S	<=0.25	S	<=1	S	<=20	S	<=0.5	S	<=0.25	S	<=0.25
RBF-18-0455-1	Freiburg	2018	bloodstream	no	S	<=4	S	<=1	S	<=1	S	<=0.25	S	<=1	S	<=20	S	<=0.5	S	<=0.25	S	<=0.25
RBF-18-0486-1	Freiburg	2018	bloodstream	no	S	<=4	S	<=1	S	<=1	S	<=0.25	S	<=1	S	<=20	S	<=0.5	S	<=0.25	S	<=0.25
RBF-17-0584-3	Freiburg	2017	bloodstream	yes	S	<=4	S	<=1	S	<=1	S	<=0.25	S	<=1	S	<=20	S	<=0.5	S	<=0.25	S	<=0.25
RBF-18-0052-1	Freiburg	2018	bloodstream	yes	R	64	R	>=64	R	16	R	>=4	R	>=16	R	>=320	S	<=0.5	S	<=0.25	S	<=0.25
RBF-18-0058-1	Freiburg	2018	bloodstream	yes	R	>=128	R	>=64	R	>=64	S	<=0.25	S	<=1	S	<=20	S	<=0.5	S	<=0.25	S	<=0.25
RBF-18-0074-1	Freiburg	2018	bloodstream	yes	S	<=4	S	<=1	S	<=1	S	<=0.25	S	<=1	S	<=20	S	<=0.5	S	<=0.25	S	<=0.25
RBF-18-0077-1	Freiburg	2018	bloodstream	no	S	<=4	S	<=1	S	<=1	S	<=0.25	S	<=1	S	<=20	S	<=0.5	S	<=0.25	S	<=0.25
RBF-17-0403-1	Freiburg	2017	bloodstream	no	S	<=4	S	<=1	S	<=1	I	0.5	S	<=1	S	<=20	S	<=0.5	S	<=0.25	S	<=0.25
RBF-18-0532-1	Freiburg	2018	bloodstream	no	S	<=4	S	<=1	S	<=1	S	<=0.25	S	<=1	R	>=320	S	<=0.5	S	<=0.25	S	<=0.25
RBF-18-0536-1	Freiburg	2018	bloodstream	no	ND		S	<=1	S	<=1	S	<=0.25	S	<=1	S	<=20	S	<=0.5	S	<=0.25	S	<=0.25
RBF-17-0106-2	Freiburg	2017	bloodstream	no	S	<=4	S	<=1	S	<=1	S	<=0.25	S	<=1	S	<=20	S	<=0.5	S	<=0.25	S	<=0.25
RBF-18-0392-1	Freiburg	2018	bloodstream	no	S	99999	S	<=1	S	<=1	S	<=0.25	S	<=1	S	<=20	S	<=0.5	S	<=0.25	S	<=0.25
RBF-18-0395-1	Freiburg	2018	bloodstream	no	S	<=4	S	<=1	S	<=1	S	<=0.25	S	<=1	S	<=20	S	<=0.5	S	2	S	<=0.25
RBF-17-0490-1	Freiburg	2017	bloodstream	no	S	<=4	S	<=1	S	<=1	S	<=0.25	S	<=1	S	<=20	S	<=0.5	S	1	S	<=0.25
RBF-17-0511-1	Freiburg	2017	bloodstream	yes	S	8	S	<=1	S	<=1	S	<=0.25	S	<=1	S	<=20	S	<=0.5	S	<=0.25	S	<=0.25
RBF-17-0514-1	Freiburg	2017	bloodstream	yes	S	<=4	S	<=1	S	<=1	S	<=0.25	S	<=1	S	<=20	S	<=0.5	S	0.5	S	<=0.25
RBF-18-0023-1	Freiburg	2018	bloodstream	yes	S	<=4	S	<=1	S	<=1	S	<=0.25	S	<=1	S	<=20	S	<=0.5	S	<=0.25	S	<=0.25
RBF-18-0045-1	Freiburg	2018	bloodstream	no	S	<=4	S	<=1	S	<=1	S	<=0.25	S	<=1	S	<=20	S	<=0.5	S	<=0.25	S	<=0.25
RBF-18-0224-1	Freiburg	2018	bloodstream	yes	ND		R	8	I	4	S	<=0.25	S	<=1	S	<=20	S	<=0.5	S	<=0.25	S	<=0.25
RBF-18-0232-1	Freiburg	2018	bloodstream	no	ND		S	<=1	S	<=1	S	<=0.25	S	<=1	S	<=20	S	<=0.5	S	0.5	S	<=0.25
RBF-17-0338-1	Freiburg	2017	bloodstream	yes	S	8	R	>=64	S	<=1	I	0.5	R	4	R	>=320	S	<=0.5	S	0.5	S	<=0.25
RBF-18-0716-1	Freiburg	2018	bloodstream	no	S	<=4	S	<=1	S	<=1	S	<=0.25	S	<=1	S	<=20	S	<=0.5	S	<=0.25	S	<=0.25
RBF-18-0729-1	Freiburg	2018	bloodstream	yes	R	>=128	R	>=64	R	>=64	S	<=0.25	S	<=1	S	<=20	S	<=0.5	S	<=0.25	S	<=0.25
RBF-17-0021-1	Freiburg	2017	bloodstream	no	S	<=4	S	<=1	S	<=1	S	<=0.25	S	<=1	S	<=20	S	<=0.5	S	<=0.25	S	<=0.25
RBF-18-0318-1	Freiburg	2018	bloodstream	yes	S	<=4	S	<=1	S	<=1	S	<=0.25	S	<=1	S	<=20	S	<=0.5	S	0.5	S	<=0.25
RBF-18-0319-1	Freiburg	2018	bloodstream	no	S	<=4	S	<=1	S	<=1	S	<=0.25	S	<=1	S	<=20	S	<=0.5	S	<=0.25	S	<=0.25
RBF-18-0335-1	Freiburg	2018	bloodstream	yes	S	8	S	<=1	S	<=1	S	<=0.25	S	<=1	S	<=20	S	<=0.5	S	1	S	<=0.25
RBF-18-0344-1	Freiburg	2018	bloodstream	no	S	<=4	S	<=1	S	<=1	S	<=0.25	S	<=1	S	<=20	S	<=0.5	S	1	S	<=0.25
RBF-18-0378-1	Freiburg	2018	bloodstream	yes	ND		R	>=64	R	>=64	S	<=0.25	S	<=1	S	<=20	S	<=0.5	S	<=0.25	S	<=0.25
RBF-18-0379-3	Freiburg	2018	bloodstream	no	S	<=4	S	<=1	S	<=1	S	<=0.25	S	<=1	S	<=20	S	<=0.5	S	<=0.25	S	<=0.25
RBF-17-0463-1	Freiburg	2017	bloodstream	no	S	<=4	S	<=1	S	<=1	S	<=0.25	S	<=1	S	<=20	S	<=0.5	S	<=0.25	S	<=0.25
RBF-18-0163-1	Freiburg	2018	bloodstream	no	S	<=4	S	<=1	S	<=1	S	<=0.25	S	<=1	S	<=20	S	<=0.5	S	0.5	S	<=0.25
RBF-17-0269-1	Freiburg	2017	bloodstream	no	S	8	S	<=1	S	<=1	S	<=0.25	S	<=1	S	<=20	S	<=0.5	S	<=0.25	S	<=0.25
RBF-17-0312-1	Freiburg	2017	bloodstream	no	S	<=4	S	<=1	S	<=1	S	<=0.25	S	<=1	S	<=20	S	<=0.5	S	0.5	S	<=0.25
RBF-17-0315-1	Freiburg	2017	bloodstream	no	S	<=4	S	<=1	S	<=1	S	<=0.25	S	<=1	S	<=20	S	<=0.5	S	<=0.25	S	<=0.25
RBF-17-0319-1	Freiburg	2017	bloodstream	no	R	>=128	R	>=64	R	>=64	S	<=0.25	S	<=1	S	<=20	S	<=0.5	S	<=0.25	S	<=0.25
RBF-17-0323-1	Freiburg	2017	bloodstream	no	S	<=4	S	<=1	S	<=1	S	<=0.25	S	<=1	S	<=20	S	<=0.5	S	<=0.25	S	<=0.25
RBF-16-0075-1	Freiburg	2016	bloodstream	yes	R	99999	I	2	S	<=1	R	>=4	S	<=1	ND		S	<=0.5	S	<=0.25	S	<=0.25
RBF-16-0084-1	Freiburg	2016	bloodstream	no	S	<=4	S	<=1	S	<=1	S	<=0.25	S	<=1	R	>=320	S	<=0.5	S	<=0.25	S	<=0.25
RBF-16-0108-1	Freiburg	2016	bloodstream	no	S	<=4	S	<=1	S	<=1	S	<=0.25	S	<=1	S	<=20	S	<=0.5	S	<=0.25	S	<=0.25
RBF-18-0266-1	Freiburg	2018	bloodstream	yes	ND		S	<=1	S	<=1	S	<=0.25	S	<=1	S	<=20	S	<=0.5	S	<=0.25	S	<=0.25
RBF-18-0271-1	Freiburg	2018	bloodstream	yes	S	<=4	S	<=1	S	<=1	S	<=0.25	S	<=1	S	<=20	S	<=0.5	S	<=0.25	S	<=0.25
RBF-18-0288-1	Freiburg	2018	bloodstream	yes	R	99999	R	>=64	R	>=64	S	<=0.25	S	<=1	S	<=20	S	<=0.5	S	<=0.25	S	<=0.25
RBF-18-0302-3	Freiburg	2018	bloodstream	yes	S	<=4	S	<=1	S	<=1	S	<=0.25	S	<=1	S	<=20	S	<=0.5	S	<=0.25	S	<=0.25
RBL-17-0354-2	Luebeck	2017	bloodstream	yes	S	<=4	S	<=1	S	<=1	R	2	S	<=1	R	>=320	S	<=0.5	S	0.5	S	<=0.25
RBL-17-0384-1	Luebeck	2017	bloodstream	yes	S	<=4	S	<=1	S	<=1	S	<=0.25	S	<=1	S	<=20	S	<=0.5	S	0.5	S	<=0.25
RBL-18-0072-1	Luebeck	2018	bloodstream	yes	R	>=128	R	>=64	R	>=64	S	<=0.25	S	<=1	S	<=20	S	<=0.5	S	<=0.25	S	<=0.25
RBL-18-0073-2	Luebeck	2018	bloodstream	yes	R	>=128	R	>=64	R	>=64	S	<=0.25	S	<=1	S	<=20	R	4	S	<=0.25	S	<=0.25
RBL-18-0073-1	Luebeck	2018	bloodstream	yes	R	>=128	R	>=64	R	16	S	<=0.25	S	<=1	S	<=20	S	<=0.5	S	<=0.25	S	<=0.25
RBL-18-0082-1	Luebeck	2018	bloodstream	yes	S	<=4	S	<=1	S	<=1	S	<=0.25	S	<=1	S	<=20	S	<=0.5	S	1	S	<=0.25
RBL-18-0105-1	Luebeck	2018	bloodstream	yes	R	>=128	R	>=64	R	>=64	R	>=4	S	<=1	S	<=20	S	<=0.5	S	0.5	S	<=0.25
RBL-17-0013-1	Luebeck	2017	bloodstream	no	S	<=4	S	<=1	S	<=1	S	<=0.25	S	<=1	S	<=20	S	<=0.5	S	0.5	S	<=0.25
RBL-17-0016-1	Luebeck	2017	bloodstream	no	S	<=4	S	<=1	S	<=1	S	<=0.25	S	<=1	S	<=20	S	<=0.5	S	<=0.25	S	<=0.25
RBL-17-0030-2	Luebeck	2017	bloodstream	no	S	<=4	S	<=1	S	<=1	S	<=0.25	S	<=1	S	<=20	S	<=0.5	S	2	S	<=0.25
RBL-18-0478-1	Luebeck	2018	bloodstream	no	S	<=4	S	<=1	S	<=1	S	<=0.25	S	<=1	S	<=20	S	<=0.5	S	<=0.25	S	<=0.25
RBL-17-0222-1	Luebeck	2017	bloodstream	no	S	<=4	S	<=1	S	<=1	S	<=0.25	S	<=1	S	<=20	S	<=0.5	S	0.5	S	<=0.25
RBL-17-0228-1	Luebeck	2017	bloodstream	yes	S	<=4	S	<=1	S	<=1	S	<=0.25	S	<=1	S	<=20	S	<=0.5	S	<=0.25	S	<=0.25
RBL-17-0250-1	Luebeck	2017	bloodstream	no	R	>=128	R	>=64	R	>=64	R	>=4	S	<=1	S	<=20	S	<=0.5	S	<=0.25	S	<=0.25
RBL-17-0250-3	Luebeck	2017	bloodstream	yes	S	<=4	S	<=1	S	<=1	R	2	S	<=1	S	<=20	S	<=0.5	S	<=0.25	S	<=0.25
RBL-17-0413-1	Luebeck	2017	bloodstream	no	S	<=4	S	<=1	S	<=1	S	<=0.25	S	<=1	S	<=20	S	<=0.5	S	<=0.25	S	<=0.25
RBL-17-0419-2	Luebeck	2017	bloodstream	yes	ND		S	<=1	S	<=1	S	<=0.25	S	<=1	S	<=20	S	<=0.5	S	0.5	S	<=0.25
RBL-17-0437-1	Luebeck	2017	bloodstream	yes	I	<=4	R	4	R	16	S	<=0.25	R	>=16	R	>=320	S	<=0.5	S	0.5	S	<=0.25
RBL-17-0449-1	Luebeck	2017	bloodstream	no	S	<=4	S	<=1	S	<=1	S	<=0.25	S	<=1	S	<=20	S	<=0.5	S	<=0.25	S	<=0.25
RBL-18-0138-1	Luebeck	2018	bloodstream	yes	R	64	R	>=64	R	32	S	<=0.25	S	<=1	S	<=20	S	<=0.5	S	<=0.25	S	<=0.25
RBL-17-0080-2	Luebeck	2017	bloodstream	no	S	<=4	S	<=1	S	<=1	S	<=0.25	S	<=1	S	<=20	S	<=0.5	S	0.5	S	<=0.25
RBL-17-0276-1	Luebeck	2017	bloodstream	no	S	<=4	S	<=1	S	<=1	S	<=0.25	S	<=1	S	<=20	S	<=0.5	S	<=0.25	S	<=0.25
RBL-17-0285-1	Luebeck	2017	bloodstream	no	S	<=4	S	<=1	S	<=1	S	<=0.25	S	<=1	S	<=20	S	<=0.5	S	<=0.25	S	<=0.25
RBL-17-0286-2	Luebeck	2017	bloodstream	no	R	>=128	R	>=64	R	>=64	S	<=0.25	S	<=1	S	<=20	R	4	S	<=0.25	S	<=0.25
RBL-17-0286-1	Luebeck	2017	bloodstream	yes	S	<=4	S	<=1	S	<=1	S	<=0.25	S	<=1	S	<=20	S	<=0.5	S	<=0.25	S	<=0.25
RBL-17-0289-2	Luebeck	2017	bloodstream	no	R	64	R	>=64	R	>=64	S	<=0.25	S	<=1	R	>=320	S	<=0.5	S	0.5	S	<=0.25
RBL-17-0289-1	Luebeck	2017	bloodstream	no	S	<=4	S	<=1	S	<=1	S	<=0.25	S	<=1	R	>=320	S	<=0.5	S	0.5	S	<=0.25
RBL-17-0298-1	Luebeck	2017	bloodstream	yes	R	>=128	R	>=64	R	32	S	<=0.25	S	<=1	S	<=20	S	<=0.5	S	<=0.25	S	<=0.25
RBL-17-0312-1	Luebeck	2017	bloodstream	no	S	<=4	S	<=1	S	<=1	S	<=0.25	S	<=1	S	<=20	S	<=0.5	S	1	S	<=0.25
RBL-18-0250-1	Luebeck	2018	bloodstream	no	R	>=128	R	>=64	R	>=64	S	<=0.25	S	<=1	S	<=20	S	<=0.5	S	<=0.25	S	<=0.25
RBL-18-0251-1	Luebeck	2018	bloodstream	no	S	<=4	S	<=1	S	<=1	S	<=0.25	S	<=1	S	<=20	S	<=0.5	S	<=0.25	S	<=0.25
RBL-18-0288-1	Luebeck	2018	bloodstream	no	R	>=128	R	>=64	R	>=64	R	2	R	>=16	R	40	R	>=8	R	>=16	R	>=16
RBL-18-0307-1	Luebeck	2018	bloodstream	yes	R	>=128	R	16	R	<=1	S	<=0.25	S	<=1	S	<=20	S	<=0.5	S	<=0.25	S	<=0.25
RBL-18-0012-1	Luebeck	2018	bloodstream	no	S	8	S	<=1	S	<=1	S	<=0.25	S	<=1	S	<=20	S	<=0.5	S	<=0.25	S	<=0.25
RBL-18-0029-2	Luebeck	2018	bloodstream	yes	R	>=128	R	32	R	>=64	S	<=0.25	S	<=1	S	<=20	S	<=0.5	S	<=0.25	S	<=0.25
RBL-18-0029-1	Luebeck	2018	bloodstream	no	S	<=4	S	<=1	S	<=1	S	<=0.25	S	<=1	S	<=20	S	<=0.5	S	<=0.25	S	<=0.25
RBL-16-0059-1	Luebeck	2016	bloodstream	yes	R	>=128	R	>=64	R	>=64	S	<=0.25	S	<=1	S	<=20	S	<=0.5	S	<=0.25	S	<=0.25
RBL-17-0312-2	Luebeck	2017	bloodstream	yes	R	>=128	R	>=64	R	>=64	S	<=0.25	S	<=1	S	<=20	ND		S	0.5	S	<=0.25
RBL-17-0334-1	Luebeck	2017	bloodstream	no	S	<=4	S	<=1	S	<=1	S	<=0.25	S	<=1	S	<=20	S	<=0.5	S	<=0.25	S	<=0.25
RBL-17-0335-1	Luebeck	2017	bloodstream	no	S	<=4	S	<=1	S	<=1	S	<=0.25	S	<=1	S	<=20	S	<=0.5	S	<=0.25	S	<=0.25
RBL-18-0315-1	Luebeck	2018	bloodstream	no	S	<=4	S	<=1	S	<=1	S	<=0.25	S	<=1	S	<=20	S	<=0.5	S	<=0.25	S	<=0.25
RBL-18-0332-1	Luebeck	2018	bloodstream	no	S	<=4	S	<=1	S	<=1	S	<=0.25	S	<=1	S	<=20	S	<=0.5	S	<=0.25	S	<=0.25
RBL-18-0346-1	Luebeck	2018	bloodstream	yes	R	>=128	R	>=64	R	>=64	R	>=4	S	<=1	R	>=320	S	<=0.5	S	<=0.25	S	<=0.25
RBL-18-0357-3	Luebeck	2018	bloodstream	no	S	<=4	S	<=1	S	<=1	S	<=0.25	S	<=1	S	<=20	S	<=0.5	S	2	S	<=0.25
RBL-16-0107-2	Luebeck	2016	bloodstream	no	ND		S	<=1	S	<=1	S	<=0.25	S	<=1	S	<=20	S	<=0.5	S	<=0.25	S	<=0.25
RBL-18-0403-1	Luebeck	2018	bloodstream	no	S	<=4	S	<=1	S	<=1	S	<=0.25	S	<=1	S	<=20	S	<=0.5	S	<=0.25	S	<=0.25
RBL-18-0456-2	Luebeck	2018	bloodstream	yes	R	>=128	R	32	R	>=64	S	<=0.25	S	<=1	S	<=20	ND		S	0.5	S	0.5
RBL-18-0461-2	Luebeck	2018	bloodstream	yes	R	>=128	R	32	R	>=64	S	<=0.25	S	<=1	S	<=20	S	<=0.5	S	<=0.25	S	<=0.25
RBL-18-0461-1	Luebeck	2018	bloodstream	no	S	<=4	S	<=1	S	<=1	S	<=0.25	S	<=1	S	<=20	S	<=0.5	S	<=0.25	S	<=0.25
RBL-17-0146-1	Luebeck	2017	bloodstream	yes	S	<=4	S	<=1	S	<=1	S	<=0.25	S	<=1	S	<=20	S	<=0.5	S	<=0.25	S	<=0.25
RBL-17-0167-1	Luebeck	2017	bloodstream	yes	S	<=4	S	<=1	S	<=1	S	<=0.25	S	<=1	S	<=20	S	<=0.5	S	<=0.25	S	<=0.25
RBL-17-0180-1	Luebeck	2017	bloodstream	yes	S	<=4	S	<=1	S	<=1	S	<=0.25	S	<=1	S	<=20	S	<=0.5	S	<=0.25	S	<=0.25
RBl-18-0180-1	Luebeck	2018	bloodstream	no	S	<=4	S	<=1	S	<=1	S	<=0.25	S	<=1	S	<=20	S	<=0.5	S	<=0.25	S	<=0.25
RBL-18-0200-1	Luebeck	2018	bloodstream	no	S	<=4	S	<=1	S	<=1	S	<=0.25	S	<=1	S	<=20	S	<=0.5	S	1	S	<=0.25
RBL-18-0227-1	Luebeck	2018	bloodstream	no	S	<=4	S	<=1	S	<=1	S	<=0.25	S	<=1	S	<=20	S	<=0.5	S	<=0.25	S	<=0.25
RBL-18-0236-1	Luebeck	2018	bloodstream	no	S	<=4	S	<=1	S	<=1	S	<=0.25	S	<=1	S	<=20	S	<=0.5	S	<=0.25	S	<=0.25
RBB-17-0120-1	Berlin	2017	bloodstream	no	S	8	S	<=1	S	<=1	S	<=0.25	S	<=1	S	<=20	S	<=0.5	S	<=0.25	S	<=0.25
RBB-17-0121-1	Berlin	2017	bloodstream	no	S	8	S	<=1	S	<=1	S	<=0.25	S	<=1	S	<=20	S	<=0.5	S	1	S	<=0.25
RBB-17-0175-1	Berlin	2017	bloodstream	no	S	<=4	S	<=1	S	<=1	S	<=0.25	ND		S	<=20	S	<=0.5	S	<=0.25	S	<=0.25			PIPERACILLIN
RBB-17-0181-1	Berlin	2017	bloodstream	no	S	<=4	S	<=1	S	<=1	S	<=0.25	S	<=1	S	<=20	S	<=0.5	S	<=0.25	S	<=0.25
RBB-17-0189-1	Berlin	2017	bloodstream	no	S	<=4	S	<=1	S	<=1	S	<=0.25	S	<=1	S	<=20	S	<=0.5	S	0.5	S	<=0.25			CEFOTAXIM
RBB-17-0195-1	Berlin	2017	bloodstream	no	I	16	I	<=1	I	4	R	2	S	<=1	S	<=20	S	<=0.5	S	<=0.25	S	<=0.25
RBB-18-0238-1	Berlin	2018	bloodstream	no	S	99999	S	99999	S	99999	S	99999	S	99999	R	99999	S	99999	S	99999	S	99999			CEFTAZIDIM
RBB-18-0252-1	Berlin	2018	bloodstream	no	S	<=4	S	<=1	S	<=1	S	<=0.25	S	<=1	S	<=20	S	<=0.5	S	<=0.25	S	<=0.25
RBB-18-0253-1	Berlin	2018	bloodstream	no	S	99999	S	99999	S	99999	S	99999	S	99999	S	99999	S	99999	S	99999	S	99999			CIPROFLOXAZIN
RBB-18-1311-1	Berlin	2018	bloodstream	no	S	99999	S	99999	S	99999	S	99999	S	99999	S	99999	S	99999	S	99999	S	99999
RBB-18-1344-1	Berlin	2018	bloodstream	no	R	99999	R	99999	R	99999	R	99999	S	99999	S	99999	R	99999	S	99999	S	99999			GENTAMICIN
RBB-18-1353-1	Berlin	2018	bloodstream	no	S	99999	S	99999	S	99999	S	99999	S	99999	S	99999	S	99999	S	99999	S	99999
RBB-18-1358-1	Berlin	2018	bloodstream	no	S	99999	S	99999	S	99999	S	99999	S	99999	S	99999	S	99999	S	99999	S	99999			COTRIMOXAZOL
RBB-17-918-1	Berlin	2017	bloodstream	no	S	99999	S	99999	S	99999	S	99999	S	99999	S	99999	S	99999	S	99999	S	99999
RBB-17-948-1	Berlin	2017	bloodstream	no	S	99999	S	99999	S	99999	S	99999	S	99999	S	99999	S	99999	S	99999	S	99999			ERTAPENEM
RBB-17-953-1	Berlin	2017	bloodstream	no	S	99999	S	99999	S	99999	S	99999	S	99999	S	99999	S	99999	S	99999	S	99999
RBB-17-0962-1	Berlin	2017	bloodstream	no	R	99999	R	99999	R	99999	I	99999	S	99999	S	99999	S	99999	S	99999	S	99999			IMIPENEM
RBB-18-1182-1	Berlin	2018	bloodstream	no	S	99999	S	99999	S	99999	S	99999	S	99999	S	99999	S	99999	S	99999	S	99999
RBB-18-1209-1	Berlin	2018	bloodstream	no	R	>=128	R	>=64	R	>=64	S	<=0.25	S	<=1	S	<=20	R	4	S	<=0.25	S	<=0.25			MEROPENEM
RBB-18-1211-1	Berlin	2018	bloodstream	no	R	>=128	R	>=64	R	>=64	S	<=0.25	S	<=1	S	<=20	R	2	S	0.5	S	<=0.25
RBB-17-0111-2	Berlin	2017	bloodstream	no	S	<=4	S	<=1	S	<=1	S	<=0.25	S	<=1	S	<=20	S	<=0.5	S	0.5	S	1
RBB-18-0098-1	Berlin	2018	bloodstream	no	R	>=128	R	>=64	R	>=64	S	<=0.25	S	<=1	S	<=20	S	<=0.5	S	<=0.25	S	<=0.25
RBB-18-1240-1	Berlin	2018	bloodstream	no	R	>=128	R	>=64	R	>=64	S	<=0.25	S	<=1	S	<=20	S	<=0.5	S	<=0.25	S	<=0.25
RBB-18-1290-1	Berlin	2018	bloodstream	no	S	99999	S	99999	S	99999	S	99999	S	99999	S	99999	S	99999	S	99999	S	99999
RBB-18-1292-1	Berlin	2018	bloodstream	no	S	99999	S	99999	S	99999	S	99999	S	99999	S	99999	S	99999	S	99999	S	99999
RBB-16-0086-1	Berlin	2016	bloodstream	no	S	<=4	S	<=1	S	<=1	S	<=0.25	S	<=1	S	<=20	S	<=0.5	S	<=0.25	S	<=0.25
RBB-17-1275-1	Berlin	2017	bloodstream	no	S	99999	S	99999	S	99999	S	99999	S	99999	S	99999	S	99999	S	99999	S	99999
RBB-17-1285-1	Berlin	2017	bloodstream	no	S	<=4	S	<=1	S	<=1	S	<=0.25	S	<=1	S	<=20	S	<=0.5	S	<=0.25	S	<=0.25
RBB-18-1120-1	Berlin	2018	bloodstream	no	S	99999	S	99999	S	99999	S	99999	S	99999	S	99999	S	99999	S	99999	S	99999
RBB-18-1121-1	Berlin	2018	bloodstream	no	S	99999	S	99999	S	99999	S	99999	S	99999	S	99999	S	99999	S	99999	S	99999
RBB-18-1135-1	Berlin	2018	bloodstream	no	S	99999	S	99999	S	99999	S	99999	S	99999	R	99999	S	99999	S	99999	S	99999
RBB-18-0493-1	Berlin	2018	bloodstream	yes	R	99999	R	99999	R	99999	R	99999	S	99999	S	99999	S	99999	S	99999	S	99999
RBB-18-0497-1	Berlin	2018	bloodstream	no	R	>=128	R	>=64	R	>=64	S	<=0.25	S	<=1	S	<=20	R	2	S	<=0.25	S	<=0.25
RBB-18-0501-1	Berlin	2018	bloodstream	no	R	>=128	R	>=64	R	>=64	S	<=0.25	S	<=1	S	<=20	I	1	S	<=0.25	S	<=0.25
RBB-18-0506-1	Berlin	2018	bloodstream	no	S	99999	S	99999	S	99999	S	99999	S	99999	S	99999	S	99999	S	99999	S	99999
RBB-18-0510-1	Berlin	2018	bloodstream	no	S	99999	S	99999	S	99999	S	99999	S	99999	ND		S	99999	S	99999	S	99999
RBB-18-0650-1	Berlin	2018	bloodstream	no	S	99999	S	99999	S	99999	S	99999	S	99999	S	99999	S	99999	S	99999	S	99999
RBK-16-0062-1	Cologne	2016	bloodstream	no	S	<=4	S	<=1	S	<=1	S	<=0.25	S	<=1	S	<=20	S	<=0.5	S	<=0.25	S	<=0.25
RBK-16-0056-1	Cologne	2016	bloodstream	no	S	<=4	S	<=1	S	<=1	S	<=0.25	S	<=1	S	<=20	S	<=0.5	S	0.5	S	<=0.25
RBK-18-0378-1	Cologne	2018	bloodstream	no	S	<=4	S	<=1	S	<=1	S	<=0.25	S	<=1	S	<=20	S	<=0.5	S	0.5	S	0.5
RBK-17-0420-1	Cologne	2017	bloodstream	no	S	<=4	S	<=1	S	<=1	S	<=0.25	S	<=1	S	<=20	S	<=0.5	S	1	S	<=0.25
RBK-18-0659-1	Cologne	2018	bloodstream	no	S	<=4	S	<=1	S	<=1	S	<=0.25	S	<=1	S	<=20	S	<=0.5	S	0.5	S	<=0.25
RBK-17-0604-1	Cologne	2017	bloodstream	no	S	<=4	S	<=1	S	<=1	S	<=0.25	S	<=1	S	<=20	S	<=0.5	S	<=0.25	S	<=0.25
RBK-17-0438-1	Cologne	2017	bloodstream	no	S	<=4	S	<=1	S	<=1	S	<=0.25	S	<=1	S	<=20	S	<=0.5	S	0.5	S	<=0.25
RBK-18-0634-1	Cologne	2018	bloodstream	no	S	<=4	S	<=1	S	<=1	S	<=0.25	S	<=1	S	<=20	S	<=0.5	S	0.5	S	<=0.25
RBT-18-0379-1	Tuebingen	2018	bloodstream	no	S	<=4	S	<=1	S	<=1	S	<=0.25	S	<=1	S	<=20	S	99999	S	<=0.25	S	<=0.25
RBT-18-0290-1	Tuebingen	2018	bloodstream	no	S	<=4	S	<=1	S	<=1	S	<=0.25	S	<=1	S	99999	S	99999	S	<=0.25	S	<=0.25
RBT-18-0356-1	Tuebingen	2018	bloodstream	no	S	<=4	S	<=1	S	<=1	S	<=0.25	S	<=1	S	<=20	ND		S	1	S	<=0.25
RBT-18-0274-1	Tuebingen	2018	bloodstream	no	S	<=4	S	<=1	S	<=1	S	<=0.25	S	<=1	S	<=20	ND		S	<=0.25	S	<=0.25
RBT-18-0306-1	Tuebingen	2018	bloodstream	no	S	<=4	S	<=1	S	<=1	S	<=0.25	S	<=1	S	<=20	ND		S	<=0.25	S	<=0.25
RBT-17-0325-1	Tuebingen	2017	bloodstream	no	S	<=4	S	<=1	S	<=1	S	<=0.25	S	<=1	S	<=20	ND		S	<=0.25	S	<=0.25
RBT-18-0264-1	Tuebingen	2018	bloodstream	no	S	<=4	S	<=1	S	<=1	S	<=0.25	S	<=1	S	<=20	S	99999	S	<=0.25	S	<=0.25
RBT-18-0258-1	Tuebingen	2018	bloodstream	no	S	<=4	S	<=1	S	<=1	S	<=0.25	S	<=1	S	<=20	ND		S	1	S	<=0.25
RBT-18-0243-2	Tuebingen	2018	bloodstream	no	R	>=128	R	>=64	R	>=64	S	<=0.25	S	<=1	S	<=20	S	99999	S	0.5	S	<=0.25
RBF-16-0008-1	Freiburg	2016	bloodstream	no	S	8	S	<=1	S	<=1	S	<=0.25	S	<=1	S	<=20	S	<=0.5	S	0.5	S	<=0.25
RBL-17-0354-1	Luebeck	2017	bloodstream	no	S	<=4	S	<=1	S	<=1	R	2	S	<=1	R	>=320	S	<=0.5	S	0.5	S	<=0.25
RBL-17-0362-1	Luebeck	2017	bloodstream	yes	S	8	S	<=1	S	<=1	S	<=0.25	S	<=1	S	<=20	S	<=0.5	S	<=0.25	S	<=0.25
RBL-17-0394-1	Luebeck	2017	bloodstream	no	S	<=4	S	<=1	S	<=1	S	<=0.25	S	<=1	S	<=20	S	<=0.5	S	1	S	<=0.25
RBL-18-0095-1	Luebeck	2018	bloodstream	no	S	<=4	S	<=1	S	<=1	S	<=0.25	S	<=1	S	<=20	S	<=0.5	S	<=0.25	S	<=0.25
RBL-18-0116-1	Luebeck	2018	bloodstream	no	S	<=4	S	<=1	S	<=1	S	<=0.25	S	<=1	S	<=20	S	<=0.5	S	1	S	<=0.25
RBL-17-0079-1	Luebeck	2017	bloodstream	yes	ND		S	<=1	S	<=1	S	<=0.25	S	<=1	S	<=20	S	<=0.5	S	<=0.25	S	<=0.25
RBL-16-0048-1	Luebeck	2016	bloodstream	no	S	<=4	S	<=1	S	<=1	S	<=0.25	S	<=1	S	<=20	S	<=0.5	S	<=0.25	S	<=0.25
RBL-16-0092-1	Luebeck	2016	bloodstream	yes	R	>=128	R	>=64	R	>=64	S	<=0.25	S	<=1	S	<=20	ND		S	<=0.25	S	<=0.25
RBL-18-0435-1	Luebeck	2018	bloodstream	no	S	<=4	S	<=1	S	<=1	S	<=0.25	S	<=1	S	<=20	S	<=0.5	S	<=0.25	S	<=0.25
RBL-18-0456-1	Luebeck	2018	bloodstream	no	S	<=4	S	<=1	S	<=1	S	<=0.25	S	<=1	S	<=20	ND		S	<=0.25	S	<=0.25
RBB-17-920-1	Berlin	2017	bloodstream	no	S	99999	S	99999	S	99999	S	99999	S	99999	S	99999	S	99999	S	99999	S	99999
RBB-17-0073-1	Berlin	2017	bloodstream	no	R	>=128	R	>=64	R	>=64	R	>=4	S	<=1	R	>=320	R	>=8	R	>=16	R	>=16
RBB-17-0104-2	Berlin	2017	bloodstream	no	ND		S	<=1	S	<=1	S	<=0.25	S	<=1	S	<=20	S	<=0.5	S	0.5	S	<=0.25
RBB-18-0319-1	Berlin	2018	bloodstream	no	R	99999	R	99999	R	99999	R	99999	S	99999	R	99999	S	99999	S	99999	S	99999
RBB-18-0320-1	Berlin	2018	bloodstream	no	R	>=128	R	32	R	>=64	S	<=0.25	S	<=1	S	<=20	S	<=0.5	S	<=0.25	S	<=0.25
RBB-18-0338-1	Berlin	2018	bloodstream	no	I	8	R	4	R	16	S	<=0.25	R	8	S	<=20	S	<=0.5	S	<=0.25	S	<=0.25
RBB-18-1224-1	Berlin	2018	bloodstream	no	R	>=128	R	>=64	R	>=64	S	<=0.25	S	<=1	S	<=20	S	<=0.5	S	0.5	S	<=0.25
RBB-18-1478-1	Berlin	2018	bloodstream	no	S	99999	S	99999	S	99999	S	99999	S	99999	S	99999	S	99999	S	99999	S	99999
RBB-18-1481-1	Berlin	2018	bloodstream	no	S	99999	S	99999	S	99999	S	99999	S	99999	S	99999	S	99999	S	99999	S	99999
RBB-18-1482-1	Berlin	2018	bloodstream	no	S	99999	S	99999	S	99999	S	99999	ND		ND		S	99999	S	99999	S	99999
RBB-18-1492-1	Berlin	2018	bloodstream	no	S	99999	S	99999	S	99999	S	99999	S	99999	S	99999	S	99999	S	99999	S	99999
RBB-18-1508-1	Berlin	2018	bloodstream	no	S	<=4	S	<=1	S	<=1	S	<=0.25	S	<=1	S	<=20	S	<=0.5	S	<=0.25	S	<=0.25
RBB-17-1074-1	Berlin	2017	bloodstream	no	R	>=128	R	>=64	R	>=64	S	<=0.25	S	<=1	S	<=20	S	<=0.5	S	1	S	<=0.25
RBB-17-1139-1	Berlin	2017	bloodstream	no	I	16	I	2	I	<=1	S	<=0.25	S	<=1	S	<=20	S	<=0.5	S	0.5	S	<=0.25
RBB-17-1153-1	Berlin	2017	bloodstream	no	ND		R	>=64	R	>=64	S	<=0.25	S	<=1	S	<=20	R	4	S	0.5	S	<=0.25
RBB-18-1085-1	Berlin	2018	bloodstream	no	S	99999	S	99999	S	99999	S	99999	S	99999	S	99999	S	99999	S	99999	S	99999
RBB-18-1089-1	Berlin	2018	bloodstream	no	R	>=128	R	>=64	R	>=64	S	<=0.25	S	<=1	S	<=20	S	<=0.5	S	<=0.25	S	<=0.25
RBB-19-0679-1	Berlin	2018	bloodstream	no	ND		S	99999	S	99999	S	99999	S	99999	S	99999	S	99999	S	99999	S	99999
RBB-17-237-1	Berlin	2017	bloodstream	no	R	99999	R	99999	R	99999	R	99999	S	99999	R	99999	R	99999	S	99999	S	99999
RBB-17-407-1	Berlin	2017	bloodstream	no	S	99999	S	99999	S	99999	S	99999	S	99999	S	99999	S	99999	S	99999	S	99999
RBB-17-413-1	Berlin	2017	bloodstream	no	R	>=128	R	>=64	R	>=64	S	<=0.25	S	<=1	S	<=20	S	<=0.5	S	<=0.25	S	<=0.25
RBB-17-414-1	Berlin	2017	bloodstream	no	S	99999	S	99999	S	99999	S	99999	S	99999	S	99999	S	99999	S	99999	S	99999
RBB-17-515-1	Berlin	2017	bloodstream	no	S	8	S	<=1	S	<=1	I	1	R	>=16	R	>=320	S	<=0.5	S	<=0.25	S	<=0.25
RBB-18-0597-1	Berlin	2018	bloodstream	no	S	99999	S	99999	S	99999	S	99999	S	99999	S	99999	S	99999	S	99999	S	99999
RBB-18-0633-1	Berlin	2018	bloodstream	no	S	99999	S	99999	S	99999	S	99999	S	99999	S	99999	S	99999	S	99999	S	99999
RBB-17-0653-1	Berlin	2017	bloodstream	no	ND		R	>=64	R	>=64	S	<=0.25	S	<=1	S	<=20	R	2	S	<=0.25	S	<=0.25
RBB-17-661-1	Berlin	2017	bloodstream	no	S	99999	S	99999	S	99999	S	99999	S	99999	S	99999	S	99999	S	99999	S	99999
RBB-17-0663-1	Berlin	2017	bloodstream	no	S	99999	S	99999	S	99999	S	99999	S	99999	S	<=20	S	99999	S	99999	S	99999
RBB-17-680-1	Berlin	2017	bloodstream	no	R	>=128	R	32	R	99999	S	<=0.25	S	<=1	S	<=20	R	2	S	<=0.25	S	<=0.25
RBB-17-685-1	Berlin	2017	bloodstream	no	R	>=128	R	>=64	R	>=64	S	<=0.25	S	<=1	S	<=20	R	2	S	0.5	S	<=0.25
RBB-17-436-1	Berlin	2017	bloodstream	no	ND		S	99999	S	99999	S	99999	S	99999	S	99999	S	99999	S	99999	S	99999
RBB-17-444-1	Berlin	2017	bloodstream	no	S	99999	S	99999	S	99999	S	99999	S	99999	S	99999	S	99999	S	99999	S	99999
RBB-17-457-1	Berlin	2017	bloodstream	no	S	99999	S	99999	S	99999	S	99999	S	99999	S	99999	S	99999	S	99999	S	99999
RBB-17-458-1	Berlin	2017	bloodstream	no	S	99999	S	99999	S	99999	S	99999	S	99999	S	99999	S	99999	S	99999	S	99999
RBB-17-479-1	Berlin	2017	bloodstream	no	S	99999	S	99999	S	99999	S	99999	S	99999	S	99999	S	99999	S	99999	S	99999
RBB-18-0523-1	Berlin	2018	bloodstream	no	S	<=4	S	<=1	S	<=1	S	<=0.25	S	<=1	S	<=20	S	<=0.5	S	0.5	S	<=0.25
RBB-18-0555-2	Berlin	2018	bloodstream	no	S	99999	S	99999	S	99999	S	99999	S	99999	S	99999	S	99999	S	99999	S	99999
RBB-17-562-1	Berlin	2017	bloodstream	no	S	99999	S	99999	S	99999	S	99999	S	99999	S	99999	S	99999	S	99999	S	99999
RBB-17-584-1	Berlin	2017	bloodstream	no	S	99999	S	99999	S	99999	S	99999	S	99999	S	99999	S	99999	S	99999	S	99999
RBB-17-603-1	Berlin	2017	bloodstream	no	S	99999	S	99999	S	99999	S	99999	S	99999	S	99999	S	99999	S	99999	S	99999
RBB-17-616-1	Berlin	2017	bloodstream	no	R	>=128	R	>=64	R	>=64	S	<=0.25	S	<=1	S	<=20	S	<=0.5	S	0.5	S	<=0.25
RBB-17-621-1	Berlin	2017	bloodstream	no	S	99999	S	99999	S	99999	S	99999	S	99999	S	99999	S	99999	S	99999	S	99999
RBB-17-838-1	Berlin	2017	bloodstream	no	ND		R	>=64	R	>=64	S	<=0.25	S	<=1	S	<=20	I	1	S	0.5	S	<=0.25
RBB-17-870-1	Berlin	2017	bloodstream	no	ND		R	>=64	R	16	S	<=0.25	S	<=1	S	<=20	S	<=0.5	S	<=0.25	S	<=0.25
RBB-18-0890-1	Berlin	2018	bloodstream	no	S	99999	S	99999	S	99999	S	99999	S	99999	S	99999	S	99999	S	99999	S	99999
RBB-18-0903-1	Berlin	2018	bloodstream	no	S	<=4	S	<=1	S	<=1	S	<=0.25	S	<=1	R	>=320	S	<=0.5	S	0.5	S	<=0.25
RBB-18-0904-1	Berlin	2018	bloodstream	no	S	99999	S	99999	S	99999	S	99999	S	99999	S	99999	S	99999	S	99999	S	99999
RBB-18-0910-1	Berlin	2018	bloodstream	no	R	>=128	R	16	R	>=64	S	<=0.25	S	<=1	S	<=20	S	<=0.5	S	2	S	<=0.25
RBB-18-0911-1	Berlin	2018	bloodstream	no	S	99999	S	99999	S	99999	S	99999	S	99999	S	99999	S	99999	S	99999	S	99999
RBB-17-531-1	Berlin	2017	bloodstream	no	S	99999	S	99999	S	99999	S	99999	S	99999	S	99999	S	99999	S	99999	S	99999
RBB-17-535-1	Berlin	2017	bloodstream	no	S	99999	S	99999	S	99999	S	99999	S	99999	S	99999	S	99999	S	99999	S	99999
RBB-17-0768-1	Berlin	2017	bloodstream	no	ND		S	99999	S	99999	S	99999	S	99999	S	<=20	S	99999	S	99999	S	99999
RBB-17-769-1	Berlin	2017	bloodstream	no	ND		S	99999	S	99999	S	99999	S	99999	S	99999	S	99999	S	99999	S	99999
RBB-17-0770-1	Berlin	2017	bloodstream	no	S	99999	S	99999	S	99999	R	99999	S	99999	R	99999	S	99999	S	99999	S	99999
RBB-17-800-1	Berlin	2017	bloodstream	no	S	99999	S	99999	S	99999	S	99999	S	99999	S	99999	S	99999	S	99999	S	99999
RBB-18-0819-1	Berlin	2018	bloodstream	no	R	99999	R	99999	R	99999	R	99999	S	99999	R	99999	I	99999	S	99999	S	99999
RBB-18-0410-1	Berlin	2018	bloodstream	no	S	99999	S	99999	S	99999	S	99999	S	99999	S	99999	S	99999	S	99999	S	99999
RBB-17-700-1	Berlin	2017	bloodstream	no	R	99999	S	99999	S	99999	S	99999	S	99999	S	99999	S	99999	S	99999	S	99999
RBB-18-0739-1	Berlin	2018	bloodstream	no	S	99999	S	99999	S	99999	S	99999	S	99999	S	99999	ND		S	99999	S	99999
RBB-18-0945-1	Berlin	2018	bloodstream	no	R	32	R	>=64	R	>=64	S	<=0.25	S	<=1	S	<=20	S	<=0.5	S	<=0.25	S	<=0.25
RBB-18-0301-1	Berlin	2018	bloodstream	no	S	99999	S	99999	S	99999	S	99999	S	99999	S	99999	S	99999	S	99999	S	99999
RBB-18-0305-1	Berlin	2018	bloodstream	no	S	99999	S	99999	S	99999	S	99999	S	99999	S	99999	S	99999	S	99999	S	99999
RBB-18-1384-1	Berlin	2018	bloodstream	no	S	99999	S	99999	S	99999	S	99999	S	99999	S	99999	S	99999	S	99999	S	99999
RBB-18-1386-1	Berlin	2018	bloodstream	no	R	16	R	4	R	2	S	<=0.25	S	<=1	S	<=20	S	<=0.5	S	<=0.25	S	<=0.25
RBB-18-1387-1	Berlin	2018	bloodstream	no	R	>=128	R	>=64	R	>=64	S	<=0.25	S	<=1	S	<=20	S	<=0.5	S	0.5	S	<=0.25
RBB-18-1399-1	Berlin	2018	bloodstream	no	S	99999	S	99999	S	99999	S	99999	S	99999	S	99999	S	99999	S	99999	S	99999
RBB-18-1400-1	Berlin	2018	bloodstream	no	S	99999	S	99999	S	99999	S	99999	S	99999	S	99999	S	99999	S	99999	S	99999
RBB-18-1417-1	Berlin	2018	bloodstream	no	S	<=4	S	<=1	S	<=1	S	<=0.25	S	<=1	S	<=20	S	<=0.5	S	0.5	S	<=0.25
RBB-16-0101-1	Berlin	2016	bloodstream	no	S	<=4	S	<=1	S	<=1	S	<=0.25	S	<=1	S	<=20	S	<=0.5	S	0.5	S	<=0.25
RBB-16-0116-1	Berlin	2016	bloodstream	yes	R	>=128	R	>=64	R	>=64	R	>=4	S	<=1	S	<=20	R	4	S	0.5	S	<=0.25
RBB-16-0165-1	Berlin	2016	bloodstream	no	R	>=128	R	>=64	R	>=64	S	<=0.25	S	<=1	S	<=20	R	2	S	<=0.25	S	<=0.25
RBB-16-0168-2	Berlin	2016	bloodstream	no	S	<=4	S	<=1	S	<=1	S	<=0.25	S	<=1	S	<=20	S	<=0.5	S	1	S	<=0.25
RBB-17-0032-1	Berlin	2017	bloodstream	no	R	>=128	R	>=64	R	>=64	R	>=4	S	<=1	R	>=320	R	4	S	<=0.25	S	<=0.25
RBB-17-0044-1	Berlin	2017	bloodstream	no	S	<=4	S	<=1	S	<=1	S	<=0.25	S	<=1	S	<=20	S	<=0.5	S	<=0.25	S	<=0.25
RBB-17-902-1	Berlin	2017	bloodstream	yes	R	>=128	R	>=64	R	>=64	R	>=4	S	<=1	R	>=320	R	4	S	0.5	S	<=0.25
RBB-17-910-1	Berlin	2017	bloodstream	no	ND		R	>=64	R	>=64	S	<=0.25	S	<=1	S	<=20	R	2	S	<=0.25	S	<=0.25
RBB-17-914-1	Berlin	2017	bloodstream	no	S	99999	S	99999	S	99999	S	99999	S	99999	S	99999	S	99999	S	99999	S	99999
RBB-17-915-1	Berlin	2017	bloodstream	no	R	99999	I	2	I	<=1	S	<=0.25	S	<=1	S	<=20	S	<=0.5	S	<=0.25	S	<=0.25
RBB-18-1025-1	Berlin	2018	bloodstream	no	S	99999	S	99999	S	99999	S	99999	S	99999	S	99999	S	99999	S	99999	S	99999
RBG-18-0186-1	Giessen	2018	bloodstream	yes	R	>=128	R	>=64	R	>=64	S	<=0.25	S	<=1	S	<=20	ND		S	1	S	<=0.25
RBG-18-0241-1	Giessen	2018	bloodstream	yes	R	64	R	>=64	R	32	S	<=0.25	S	<=1	S	<=20	ND		S	0.5	S	<=0.25
RBG-18-0241-2	Giessen	2018	bloodstream	no	S	<=4	S	<=1	S	<=1	S	<=0.25	S	<=1	S	<=20	ND		S	8	S	<=0.25
RBG-18-0242-1	Giessen	2018	bloodstream	yes	S	8	S	<=1	S	<=1	S	<=0.25	S	<=1	S	<=20	ND		S	0.5	S	<=0.25
RBG-17-0011-1	Giessen	2017	bloodstream	no	R	>=128	R	>=64	R	>=64	S	<=0.25	S	<=1	S	<=20	ND		S	<=0.25	S	<=0.25
RBG-17-0017-1	Giessen	2017	bloodstream	no	R	>=128	R	>=64	R	>=64	S	<=0.25	S	<=1	S	<=20	ND		S	<=0.25	S	<=0.25
RBG-17-0018-1	Giessen	2017	bloodstream	yes	R	64	I	<=1	I	<=1	S	<=0.25	S	<=1	S	<=20	ND		S	<=0.25	S	<=0.25
RBG-17-0043-1	Giessen	2017	bloodstream	no	S	<=4	S	<=1	S	<=1	S	<=0.25	S	<=1	S	<=20	ND		S	<=0.25	S	<=0.25
RBG-17-0358-1	Giessen	2017	bloodstream	yes	S	<=4	S	<=1	S	<=1	S	<=0.25	S	<=1	S	<=20	ND		S	<=0.25	S	<=0.25
RBG-17-0389-1	Giessen	2017	bloodstream	yes	S	<=4	S	<=1	S	<=1	S	<=0.25	S	<=1	S	<=20	ND		S	0.5	S	<=0.25
RBG-18-0277-1	Giessen	2018	bloodstream	no	S	<=4	S	<=1	S	<=1	S	<=0.25	S	<=1	S	<=20	ND		S	<=0.25	S	<=0.25
RBG-17-0085-1	Giessen	2017	bloodstream	yes	S	<=4	S	<=1	S	<=1	S	<=0.25	S	<=1	S	<=20	ND		S	<=0.25	S	<=0.25
RBG-17-0232-1	Giessen	2017	bloodstream	no	S	<=4	S	<=1	S	<=1	S	<=0.25	S	<=1	S	<=20	ND		S	0.5	S	<=0.25
RBG-17-0246-1	Giessen	2017	bloodstream	yes	R	>=128	R	>=64	R	>=64	S	<=0.25	S	<=1	S	<=20	ND		S	0.5	S	0.5
RBG-18-0033-1	Giessen	2018	bloodstream	no	S	8	S	<=1	S	<=1	S	<=0.25	S	<=1	S	<=20	ND		S	0.5	S	<=0.25
RBG-18-0320-1	Giessen	2018	bloodstream	yes	R	>=128	R	>=64	R	>=64	S	<=0.25	S	<=1	S	<=20	ND		S	0.5	S	<=0.25
RBG-18-0326-1	Giessen	2018	bloodstream	no	S	<=4	S	<=1	S	<=1	S	<=0.25	S	<=1	S	<=20	ND		S	1	S	<=0.25
RBG-18-0332-1	Giessen	2018	bloodstream	no	S	<=4	S	<=1	S	<=1	S	<=0.25	S	<=1	S	<=20	ND		S	<=0.25	S	<=0.25
RBG-18-0362-1	Giessen	2018	bloodstream	no	S	<=4	S	<=1	S	<=1	S	<=0.25	S	<=1	S	<=20	ND		S	0.5	S	<=0.25
RBG-18-0376-1	Giessen	2018	bloodstream	no	S	<=4	S	<=1	S	<=1	S	<=0.25	S	<=1	S	<=20	ND		S	1	S	<=0.25
RBG-18-0378-1	Giessen	2018	bloodstream	yes	R	16	R	>=64	R	16	R	1	S	<=1	S	<=20	ND		S	<=0.25	S	<=0.25
RBG-17-0139-1	Giessen	2017	bloodstream	no	I	16	S	<=1	S	<=1	R	2	S	<=1	S	<=20	ND		S	<=0.25	S	<=0.25
RBG-17-0170-1	Giessen	2017	bloodstream	no	S	<=4	S	<=1	S	<=1	S	<=0.25	S	<=1	S	<=20	ND		S	<=0.25	S	<=0.25
RBG-17-0181-1	Giessen	2017	bloodstream	no	R	64	R	32	R	16	S	<=0.25	S	<=1	S	<=20	ND		S	<=0.25	S	<=0.25
RBG-17-0253-1	Giessen	2017	bloodstream	no	S	<=4	S	<=1	S	<=1	S	<=0.25	S	<=1	S	<=20	ND		S	0.5	S	<=0.25
RBG-17-0257-1	Giessen	2017	bloodstream	yes	S	<=4	S	<=1	S	<=1	S	<=0.25	S	<=1	S	<=20	ND		S	0.5	S	<=0.25
RBG-17-0272-1	Giessen	2017	bloodstream	yes	R	>=128	S	<=1	S	<=1	S	<=0.25	S	<=1	R	>=320	ND		S	<=0.25	S	<=0.25
RBG-18-0051-1	Giessen	2018	bloodstream	no	S	<=4	S	<=1	S	<=1	S	<=0.25	S	<=1	S	<=20	ND		S	<=0.25	S	<=0.25
RBG-16-0014-1	Giessen	2016	bloodstream	no	S	<=4	S	<=1	S	<=1	S	<=0.25	S	<=1	S	<=20	ND		S	0.5	S	<=0.25
RBG-16-0046-1	Giessen	2016	bloodstream	yes	S	<=4	S	<=1	S	<=1	S	<=0.25	S	<=1	S	<=20	ND		S	<=0.25	S	<=0.25
RBG-18-0389-1	Giessen	2018	bloodstream	no	S	<=4	S	<=1	S	<=1	S	<=0.25	S	<=1	S	<=20	ND		S	<=0.25	S	<=0.25
RBG-18-0406-1	Giessen	2018	bloodstream	no	R	>=128	R	>=64	R	>=64	R	1	S	<=1	S	<=20	ND		S	<=0.25	S	0.5
RBG-18-0415-1	Giessen	2018	bloodstream	yes	R	>=128	R	32	R	>=64	S	<=0.25	S	<=1	S	<=20	ND		S	0.5	S	<=0.25
RBG-18-0432-1	Giessen	2018	bloodstream	no	S	<=4	S	<=1	S	<=1	S	<=0.25	S	<=1	S	<=20	ND		S	0.5	S	<=0.25
RBG-17-0309-2	Giessen	2017	bloodstream	yes	I	16	R	99999	R	99999	S	99999	S	99999	S	99999	ND		S	99999	S	99999
RBG-17-0326-1	Giessen	2017	bloodstream	no	S	<=4	S	<=1	S	<=1	S	<=0.25	S	<=1	S	<=20	ND		S	<=0.25	S	<=0.25
RBG-17-0333-1	Giessen	2017	bloodstream	no	S	<=4	S	<=1	S	<=1	S	<=0.25	S	<=1	S	<=20	ND		S	<=0.25	S	<=0.25
RBG-17-0339-1	Giessen	2017	bloodstream	no	R	>=128	R	16	R	16	S	<=0.25	S	<=1	S	<=20	ND		S	<=0.25	S	<=0.25
RBG-17-0345-1	Giessen	2017	bloodstream	yes	S	<=4	S	<=1	S	<=1	S	<=0.25	S	<=1	S	<=20	ND		S	0.5	S	<=0.25
RBG-18-0107-1	Giessen	2018	bloodstream	yes	I	16	I	2	I	2	R	2	S	<=1	S	<=20	ND		S	0.5	S	<=0.25
RPK-18-360-1	Cologne	2018	colonization	yes	R	>=128	R	>=64	R	>=64	S	<=0.25	S	<=1	S	<=20	R	2	S	<=0.25	S	<=0.25
RPK-18-503-1	Cologne	2018	colonization	yes	R	>=128	R	>=64	R	>=64	S	<=0.25	S	<=1	S	<=20	R	2	S	1	S	<=0.25
RPK-18-503-2	Cologne	2018	colonization	yes	R	>=128	R	>=64	R	>=64	S	<=0.25	S	<=1	S	<=20	R	2	S	1	S	<=0.25
RPK-16-191-2	Cologne	2016	colonization	yes	I	16	R	8	R	4	S	<=0.25	S	2	S	<=20	I	1	I	1	S	<=0.25
RPK-16-522-1	Cologne	2016	colonization	yes	R	>=128	R	>=64	R	>=64	S	<=0.25	S	<=1	S	<=20	S	<=0.5	S	0.5	S	<=0.25
RPK-18-524-1	Cologne	2018	colonization	yes	R	>=128	R	>=64	R	>=64	S	<=0.25	S	<=1	S	<=20	I	1	S	1	S	0.5
RPK-18-093-1	Cologne	2018	colonization	no	R	>=128	R	>=64	R	>=64	S	<=0.25	S	<=1	S	<=20	R	2	S	<=0.25	S	<=0.25
RPK-17-322-2	Cologne	2017	colonization	yes	I	8	R	>=64	I	<=1	S	<=0.25	S	<=1	S	<=20	S	<=0.5	S	0.5	S	<=0.25
RPK-17-325-1	Cologne	2017	colonization	yes	R	>=128	R	>=64	R	>=64	S	<=0.25	S	<=1	S	<=20	R	2	S	<=0.25	S	<=0.25
RPK-17-332-1	Cologne	2017	colonization	yes	R	>=128	R	>=64	R	>=64	S	<=0.25	S	<=1	S	<=20	R	4	S	<=0.25	S	<=0.25
RPK-18-072-1	Cologne	2018	colonization	yes	R	>=128	R	>=64	R	>=64	S	<=0.25	S	<=1	S	<=20	S	<=0.5	S	1	S	<=0.25
RPK-17-437-2	Cologne	2017	colonization	yes	I	16	I	2	S	<=1	R	>=4	S	<=1	S	40	S	<=0.5	S	<=0.25	S	<=0.25
RPK-17-504-1	Cologne	2017	colonization	no	R	>=128	R	>=64	R	>=64	S	<=0.25	S	<=1	S	<=20	S	<=0.5	S	<=0.25	S	<=0.25
RPK-18-173-1	Cologne	2018	colonization	yes	R	>=128	R	4	R	4	S	<=0.25	S	<=1	S	<=20	S	<=0.5	S	2	S	2
RPK-18-156-1	Cologne	2018	colonization	yes	R	>=128	R	>=64	R	>=64	R	1	S	<=1	S	<=20	S	<=0.5	S	1	S	<=0.25
RPK-18-157-1	Cologne	2018	colonization	yes	R	>=128	R	8	R	16	S	<=0.25	S	<=1	S	<=20	S	<=0.5	S	0.5	S	<=0.25
RPT-16-054-1	Tuebingen	2016	colonization	yes	R	>=128	R	>=64	R	>=64	S	<=0.25	S	<=1	S	<=20	S	99999	S	99999	S	99999
RPT-17-298-1	Tuebingen	2017	colonization	yes	R	>=128	R	>=64	R	>=64	S	<=0.25	S	<=1	S	<=20	S	<=0.5	S	1	S	<=0.25
RPt-18-057-1	Tuebingen	2018	colonization	yes	R	>=128	R	>=64	R	>=64	S	<=0.25	S	<=1	S	<=20	S	<=0.5	S	<=0.25	S	<=0.25
RPT-17-081-1	Tuebingen	2017	colonization	yes	I	16	R	8	I	4	S	<=0.25	S	<=1	S	<=20	R	4	S	1	S	1
RPT-16-254-1	Tuebingen	2016	colonization	no	I	16	R	4	I	4	S	<=0.25	S	<=1	S	<=20	S	99999	S	99999	S	<=0.25
RPT-16-254-2	Tuebingen	2016	colonization	yes	R	>=128	R	8	I	4	S	<=0.25	S	<=1	S	<=20	S	99999	S	99999	S	99999
RPT-16-249-1	Tuebingen	2016	colonization	no	R	>=128	R	>=64	R	>=64	S	<=0.25	S	<=1	S	<=20	I	1	S	1	S	99999
RPF-18-225-1	Freiburg	2018	colonization	yes	R	>=128	R	>=64	R	>=64	S	<=0.25	S	<=1	S	<=20	S	4	S	1	S	0.5
RPF-18-247-1	Freiburg	2018	colonization	yes	R	>=128	R	16	R	16	S	<=0.25	S	<=1	S	<=20	S	<=0.5	S	<=0.25	S	<=0.25
RPF-18-297-1	Freiburg	2018	colonization	yes	ND		R	4	I	4	S	<=0.25	S	<=1	S	<=20	S	<=0.5	S	<=0.25	S	<=0.25
RPF-17-260-1	Freiburg	2017	colonization	yes	S	8	R	16	I	2	S	<=0.25	R	4	R	>=320	S	<=0.5	S	0.5	S	<=0.25
RPF-17-249-1	Freiburg	2017	colonization	yes	S	8	R	8	S	<=1	R	2	R	8	S	<=20	S	<=0.5	S	2	S	<=0.25
RPF-17-222-2	Freiburg	2017	colonization	yes	S	8	R	>=64	S	<=1	S	<=0.25	S	<=1	S	<=20	S	<=0.5	S	<=0.25	S	<=0.25
RPF-18-143-1	Freiburg	2018	colonization	yes	R	>=128	R	>=64	R	>=64	S	<=0.25	S	<=1	S	<=20	S	<=0.5	S	0.5	S	<=0.25
RPF-18-265-1	Freiburg	2018	colonization	yes	ND		R	32	R	16	S	<=0.25	S	<=1	S	<=20	R	>=8	S	1	S	1
RPF-17-168-1	Freiburg	2017	colonization	yes	R	>=128	R	>=64	R	>=64	S	<=0.25	S	<=1	S	<=20	S	<=0.5	S	<=0.25	S	<=0.25
RPF-18-104-1	Freiburg	2018	colonization	yes	S	8	R	8	S	<=1	S	<=0.25	S	<=1	R	>=320	S	<=0.5	S	<=0.25	S	<=0.25
RPL-16-036-1	Luebeck	2016	colonization	yes	I	16	R	16	R	16	S	<=0.25	S	<=1	S	<=20	S	<=0.5	S	<=0.25	S	<=0.25
RPL-18-211-3	Luebeck	2018	colonization	yes	ND		R	>=64	R	>=64	S	<=0.25	S	<=1	S	<=20	I	1	S	0.5	S	<=0.25
RPL-18-150-1	Luebeck	2018	colonization	yes	ND		R	>=64	R	>=64	S	<=0.25	S	<=1	S	<=20	S	<=0.5	S	0.5	S	<=0.25
RPL-18-075-1	Luebeck	2018	colonization	yes	ND		R	>=64	R	>=64	S	<=0.25	S	<=1	R	>=320	R	2	S	<=0.25	S	<=0.25
RPL-18-213-1	Luebeck	2018	colonization	yes	ND		R	4	R	4	S	<=0.25	S	<=1	S	<=20	S	<=0.5	S	<=0.25	S	<=0.25
RPL-16-286-1	Luebeck	2016	colonization	yes	ND		R	>=64	R	>=64	S	<=0.25	S	<=1	S	<=20	S	<=0.5	S	<=0.25	S	<=0.25
RPL-17-177-1	Luebeck	2017	colonization	yes	R	32	R	>=64	R	>=64	S	<=0.25	S	<=1	S	<=20	S	<=0.5	S	0.5	S	<=0.25
RPB-18-151-1	Berlin	2018	colonization	yes	R	16	R	4	R	8	S	<=0.25	S	<=1	S	<=20	S	<=0.5	S	<=0.25	S	<=0.25
RPB-18-236-1	Berlin	2018	colonization	no	R	64	R	16	R	16	S	<=0.25	S	<=1	S	<=20	S	<=0.5	S	<=0.25	S	<=0.25
RPB-18-456-1	Berlin	2018	colonization	yes	R	>=128	R	>=64	R	>=64	S	<=0.25	S	<=1	S	<=20	R	2	S	<=0.25	S	<=0.25
RPB-18-431-1	Berlin	2018	colonization	yes	R	>=128	R	32	R	32	S	<=0.25	S	<=1	S	<=20	S	<=0.5	S	<=0.25	S	<=0.25
RPB-18-431-2	Berlin	2018	colonization	yes	R	>=128	R	>=64	R	>=64	S	<=0.25	S	<=1	S	<=20	R	2	S	0.5	S	<=0.25
RPB-18-432-1	Berlin	2018	colonization	no	R	64	R	8	R	8	S	<=0.25	S	<=1	S	<=20	S	<=0.5	S	0.5	S	<=0.25
RPB-18-433-1	Berlin	2018	colonization	yes	R	>=128	R	>=64	R	>=64	S	<=0.25	S	<=1	S	<=20	S	<=0.5	S	0.5	S	<=0.25
RPB-18-042-1	Berlin	2018	colonization	yes	R	>=128	R	>=64	R	>=64	S	<=0.25	S	<=1	S	<=20	R	2	S	1	S	<=0.25
RPB-18-140-1	Berlin	2018	colonization	yes	R	>=128	R	>=64	R	>=64	S	<=0.25	S	<=1	S	<=20	I	<=0.5	S	<=0.25	S	<=0.25
RPB-18-271-3	Berlin	2018	colonization	no	R	>=128	R	>=64	R	>=64	S	<=0.25	S	<=1	S	<=20	S	<=0.5	S	0.5	S	<=0.25
RPB-17-198-1	Berlin	2017	colonization	yes	I	<=4	R	>=64	R	16	S	<=0.25	S	<=1	R	>=320	S	<=0.5	S	<=0.25	S	<=0.25
RPB-18-510-1	Berlin	2018	colonization	yes	R	>=128	R	>=64	R	>=64	S	<=0.25	S	<=1	S	<=20	R	2	S	<=0.25	S	<=0.25
RPB-17-356-1	Berlin	2017	colonization	yes	R	>=128	R	>=64	R	>=64	S	<=0.25	S	<=1	S	<=20	R	4	S	<=0.25	S	<=0.25
RPB-18-460-1	Berlin	2018	colonization	yes	R	>=128	R	>=64	R	>=64	S	<=0.25	S	<=1	S	<=20	R	4	I	1	I	1
RPG-17-579-1	Giessen	2017	colonization	yes	ND		R	>=64	R	>=64	S	<=0.25	S	<=1	S	<=20	R	4	I	1	I	<=0.25
RPG-18-082-1	Giessen	2018	colonization	no	R	>=128	R	>=64	R	>=64	S	<=0.25	S	<=1	S	<=20	S	<=0.5	S	<=0.25	S	<=0.25
RPG-18-082-2	Giessen	2018	colonization	no	R	>=128	R	>=64	R	>=64	S	<=0.25	S	<=1	S	<=20	S	<=0.5	S	<=0.25	S	<=0.25
RPG-17-577-1	Giessen	2017	colonization	yes	R	>=128	R	>=64	R	>=64	S	<=0.25	S	2	S	<=20	R	>=8	I	99999	S	99999
RPG-18-013-2	Giessen	2018	colonization	no	R	>=128	R	>=64	R	>=64	S	<=0.25	S	<=1	S	<=20	ND		S	0.5	S	<=0.25
RPG-18-198-1	Giessen	2018	colonization	no	R	8	R	>=64	R	4	R	1	R	8	R	>=320	ND		S	0.5	S	0.5
RPG-18-094-1	Giessen	2018	colonization	no	R	>=128	R	32	R	>=64	S	<=0.25	S	<=1	S	<=20	S	<=0.5	S	0.5	S	<=0.25
RPG-17-504-1	Giessen	2017	colonization	yes	R	>=128	R	>=64	R	>=64	S	<=0.25	I	4	S	<=20	R	>=8	S	99999	S	99999
RPG-17-402-1	Giessen	2017	colonization	no	R	>=128	R	>=64	R	>=64	S	<=0.25	S	2	S	<=20	R	>=8	R	>=16	R	>=16
RPG-18-173-1	Giessen	2018	colonization	no	R	>=128	R	>=64	R	>=64	S	<=0.25	S	<=1	S	<=20	I	1	S	99999	S	99999
And1463	Berlin	2011	colonization	yes	ND	ND	ND	ND	ND	ND	ND	ND	ND	ND	ND	ND	ND	ND	ND	ND	ND	ND
And2481	Berlin	2013	colonization	yes	ND	ND	ND	ND	ND	ND	ND	ND	ND	ND	ND	ND	ND	ND	ND	ND	ND	ND
And2854	Berlin	2013	colonization	yes	ND	ND	ND	ND	ND	ND	ND	ND	ND	ND	ND	ND	ND	ND	ND	ND	ND	ND
And4961	Berlin	2014	colonization	yes	ND	ND	ND	ND	ND	ND	ND	ND	ND	ND	ND	ND	ND	ND	ND	ND	ND	ND
And6885	Berlin	2015	colonization	yes	ND	ND	ND	ND	ND	ND	ND	ND	ND	ND	ND	ND	ND	ND	ND	ND	ND	ND
And8437	Berlin	2015	colonization	yes	ND	ND	ND	ND	ND	ND	ND	ND	ND	ND	ND	ND	ND	ND	ND	ND	ND	ND
BK4615	Tuebingen	2011	bloodstream	yes	ND	ND	ND	ND	ND	ND	ND	ND	ND	ND	ND	ND	ND	ND	ND	ND	ND	ND
BK4767	Tuebingen	2011	bloodstream	yes	ND	ND	ND	ND	ND	ND	ND	ND	ND	ND	ND	ND	ND	ND	ND	ND	ND	ND
BK5433	Tuebingen	2012	bloodstream	yes	ND	ND	ND	ND	ND	ND	ND	ND	ND	ND	ND	ND	ND	ND	ND	ND	ND	ND
BK6046	Tuebingen	2013	bloodstream	yes	ND	ND	ND	ND	ND	ND	ND	ND	ND	ND	ND	ND	ND	ND	ND	ND	ND	ND
BK6227	Tuebingen	2014	bloodstream	yes	ND	ND	ND	ND	ND	ND	ND	ND	ND	ND	ND	ND	ND	ND	ND	ND	ND	ND
BK6664	Tuebingen	2014	colonization	yes	ND	ND	ND	ND	ND	ND	ND	ND	ND	ND	ND	ND	ND	ND	ND	ND	ND	ND
BK6928	Tuebingen	2015	bloodstream	yes	ND	ND	ND	ND	ND	ND	ND	ND	ND	ND	ND	ND	ND	ND	ND	ND	ND	ND
BK7261	Tuebingen	2015	bloodstream	yes	ND	ND	ND	ND	ND	ND	ND	ND	ND	ND	ND	ND	ND	ND	ND	ND	ND	ND
ESBL2036	Berlin	2011	colonization	yes	ND	ND	ND	ND	ND	ND	ND	ND	ND	ND	ND	ND	ND	ND	ND	ND	ND	ND
ESBL3012	Berlin	2012	colonization	yes	ND	ND	ND	ND	ND	ND	ND	ND	ND	ND	ND	ND	ND	ND	ND	ND	ND	ND
ESBL3620	Berlin	2012	colonization	yes	ND	ND	ND	ND	ND	ND	ND	ND	ND	ND	ND	ND	ND	ND	ND	ND	ND	ND
ESBL5467	Berlin	2014	colonization	yes	ND	ND	ND	ND	ND	ND	ND	ND	ND	ND	ND	ND	ND	ND	ND	ND	ND	ND
F00728	Cologne	2013	bloodstream	yes	ND	ND	ND	ND	ND	ND	ND	ND	ND	ND	ND	ND	ND	ND	ND	ND	ND	ND
F03651	Cologne	2015	bloodstream	yes	ND	ND	ND	ND	ND	ND	ND	ND	ND	ND	ND	ND	ND	ND	ND	ND	ND	ND
F-1367	Cologne	2019	bloodstream	yes	ND	ND	ND	ND	ND	ND	ND	ND	ND	ND	ND	ND	ND	ND	ND	ND	ND	ND
F-147	Cologne	2014	bloodstream	yes	ND	ND	ND	ND	ND	ND	ND	ND	ND	ND	ND	ND	ND	ND	ND	ND	ND	ND
F-190	Cologne	2015	bloodstream	yes	ND	ND	ND	ND	ND	ND	ND	ND	ND	ND	ND	ND	ND	ND	ND	ND	ND	ND
F-232	Cologne	2014	bloodstream	yes	ND	ND	ND	ND	ND	ND	ND	ND	ND	ND	ND	ND	ND	ND	ND	ND	ND	ND
F-8789	Cologne	2012	bloodstream	yes	ND	ND	ND	ND	ND	ND	ND	ND	ND	ND	ND	ND	ND	ND	ND	ND	ND	ND
RPB-16-0320-1	Berlin	2016	colonization	yes	ND	ND	ND	ND	ND	ND	ND	ND	ND	ND	ND	ND	ND	ND	ND	ND	ND	ND
RPB-17-0076-1	Berlin	2017	colonization	yes	ND	ND	ND	ND	ND	ND	ND	ND	ND	ND	ND	ND	ND	ND	ND	ND	ND	ND
RPB-17-0209-1	Berlin	2017	colonization	yes	ND	ND	ND	ND	ND	ND	ND	ND	ND	ND	ND	ND	ND	ND	ND	ND	ND	ND
RPB-17-0441-1	Berlin	2017	colonization	yes	ND	ND	ND	ND	ND	ND	ND	ND	ND	ND	ND	ND	ND	ND	ND	ND	ND	ND
RPB-17-0516-2	Berlin	2017	colonization	yes	ND	ND	ND	ND	ND	ND	ND	ND	ND	ND	ND	ND	ND	ND	ND	ND	ND	ND
RPB-17-0516-3	Berlin	2017	colonization	yes	ND	ND	ND	ND	ND	ND	ND	ND	ND	ND	ND	ND	ND	ND	ND	ND	ND	ND
RPK-18-0479-1	Cologne	2018	colonization	yes	ND	ND	ND	ND	ND	ND	ND	ND	ND	ND	ND	ND	ND	ND	ND	ND	ND	ND
Survcare220	Giessen	2019	colonization	yes	ND	ND	ND	ND	ND	ND	ND	ND	ND	ND	ND	ND	ND	ND	ND	ND	ND	ND
Key
ND	Not done
9999	over the highest limit

## Sheet: (b)list of 165 isolates studied
Isolate	Year_of_isolation	Source_of_isolation	Site_of_isolation	MALDI-TOF_Identification	OGRI_spp (ANI%)	hsp60	MLST	E_xiangfangensis_lineage(BAPS_clusters)	plasmid_replicons	mcr-9	arn_gene_cassette	iro_gene_cassette	Carbapenemases	Spp	E_xL-1angfangensL-1s_lL-1neage(BAPS_clusters)	Isolate	colistin MIC range	colistin MIC range (pH5)	HR% at 8 µg/ml colistin	HR% at 32 µg/ml colistin
And8437	2015	abdominal puncture	Berlin	E_cloacae	Enterobacter_xiangfangensis_NZ_CP017183 (97.13%)	VIII	93	I	IncHI2_IncHI2A	present	present	present	absent	E_xiangfangensis	L-1	And8437	1-4	not done	not done	not done
BK4615	2011	blood	Tubingen	E_spp	Enterobacter_xiangfangensis_NZ_CP017183 (97.11%)	VIII	170	I	NA	absent	present	present	absent	E_xiangfangensis	L-1	BK4615	2-16	not done	0.19 ± 0.00	0.00 ± 0.00
BK4767	2011	blood	Tubingen	E_spp	Enterobacter_xiangfangensis_NZ_CP017183 (97.11%)	VIII	190	I	Col_IncFIB_IncFII	absent	present	present	absent	E_xiangfangensis	L-1	BK4767	32	256	0.00 ± 0.00	0.00 ± 0.00
BK6928	2015	blood	Tubingen	E_spp	Enterobacter_xiangfangensis_NZ_CP017183 (97.1%)	VIII	831	I	IncA/C_IncA/C2	absent	present	present	absent	E_xiangfangensis	L-1	BK6928	16	512	0.00 ± 0.00	0.00 ± 0.00
ESBL3012	2012	rectal swab	Berlin	E_cloacae	Enterobacter_xiangfangensis_NZ_CP017183 (97.1%)	VIII	603	I	IncHI2_IncHI2A	present	present	present	SHV-134	E_xiangfangensis	L-1	ESBL3012	16-32	not done	not done	not done
ESBL3620	2012	PEG (percutaneous endoscopic gastrostomy)	Berlin	E_cloacae_complex	Enterobacter_xiangfangensis_NZ_CP017183 (97.08%)	VIII	175	I	IncL/M	absent	present	present	SHV-7	E_xiangfangensis	L-1	ESBL3620	4-6	not done	not done	not done
ESBL5467	2014	rectal swab	Berlin	E_cloacae	Enterobacter_xiangfangensis_NZ_CP017183 (97.11%)	VIII	1202	I	NA	absent	present	present	absent	E_xiangfangensis	L-1	ESBL5467	4-16	not done	not done	not done
F03651	2015	blood	Cologne	E_cloacae	Enterobacter_xiangfangensis_NZ_CP017183 (97.13%)	VIII	45	I	IncFIB_IncFII	absent	present	present	absent	E_xiangfangensis	L-1	F03651	4-16	not done	not done	not done
F-190	2015	blood	Cologne	E_cloacae	Enterobacter_xiangfangensis_NZ_CP017183 (97.09%)	VIII	636	I	NA	absent	present	present	absent	E_xiangfangensis	L-1	F-190	4-16	128	0.29 ± 0.51	0.00 ± 0.00
F-232	2014	blood	Cologne	E_cloacae	Enterobacter_xiangfangensis_NZ_CP017183 (97.09%)	VIII	1268	I	NA	absent	present	present	absent	E_xiangfangensis	L-1	F-232	4-16	not done	not done	not done
RBB-18-0493-1	2018	blood	Berlin	E_cloacae	Enterobacter_xiangfangensis_NZ_CP017183 (97.1%)	VIII	1198	I	NA	absent	present	present	absent	E_xiangfangensis	L-1	RBB-18-0493-1	1-8	not done	not done	not done
RBF-16-0075-1	2016	blood	Freiburg	E_cloacae	Enterobacter_xiangfangensis_NZ_CP017183 (97.11%)	VIII	45	I	IncX1	absent	present	present	absent	E_xiangfangensis	L-1	RBF-16-0075-1	4-32	not done	not done	not done
RBF-18-0058-1	2018	blood	Freiburg	E_cloacae	Enterobacter_xiangfangensis_NZ_CP017183 (97.09%)	VIII	204	I	IncFIB_IncFII	absent	present	present	absent	E_xiangfangensis	L-1	RBF-18-0058-1	4-16	not done	not done	not done
RBF-18-0288-1	2018	blood	Freiburg	E_cloacae	Enterobacter_xiangfangensis_NZ_CP017183 (97.11%)	VIII	116	I	NA	absent	present	present	absent	E_xiangfangensis	L-1	RBF-18-0288-1	4-16	not done	not done	not done
RBF-18-0302-3	2018	blood	Freiburg	E_cloacae	Enterobacter_xiangfangensis_NZ_CP017183 (97.08%)	VIII	662	I	pENTAS02	absent	present	present	absent	E_xiangfangensis	L-1	RBF-18-0302-3	2-64	not done	not done	not done
RBF-18-0318-1	2018	blood	Freiburg	E_cloacae	Enterobacter_xiangfangensis_NZ_CP017183 (97.1%)	VIII	50	I	NA	absent	present	present	absent	E_xiangfangensis	L-1	RBF-18-0318-1	4-16	not done	not done	not done
RBF-18-0729-1	2018	blood	Freiburg	E_cloacae	Enterobacter_xiangfangensis_NZ_CP017183 (97.08%)	VIII	1279	I	NA	absent	present	present	absent	E_xiangfangensis	L-1	RBF-18-0729-1	not done	not done	not done	not done
RBG-17-0018-1	2017	blood	Giessen	E_cloacae	Enterobacter_xiangfangensis_NZ_CP017183 (97.11%)	VIII	133	I	IncFIB	absent	absent	present	absent	E_xiangfangensis	L-1	RBG-17-0018-1	2-4	not done	not done	not done
RBG-17-0257-1	2017	blood	Giessen	E_cloacae	Enterobacter_xiangfangensis_NZ_CP017183 (97.11%)	VIII	1116	I	IncFIB_IncFII	absent	present	present	absent	E_xiangfangensis	L-1	RBG-17-0257-1	4-32	not done	not done	not done
RBG-17-0272-1	2017	blood	Giessen	E_cloacae	Enterobacter_xiangfangensis_NZ_CP017183 (97.08%)	VIII	133	I	IncFIB_IncFII	absent	absent	present	absent	E_xiangfangensis	L-1	RBG-17-0272-1	4	not done	not done	not done
RBG-17-0345-1	2017	blood	Giessen	E_cloacae	Enterobacter_xiangfangensis_NZ_CP017183 (97.06%)	VIII	175	I	NA	absent	present	present	absent	E_xiangfangensis	L-1	RBG-17-0345-1	4-16	not done	not done	not done
RBG-18-0107-1	2018	blood	Giessen	E_cloacae	Enterobacter_xiangfangensis_NZ_CP017183 (97.12%)	VIII	175	I	IncHI2_IncHI2A	present	present	present	absent	E_xiangfangensis	L-1	RBG-18-0107-1	4-16	not done	0.19 ± 0.00	0.00 ± 0.00
RBG-18-0186-1	2018	blood	Giessen	E_cloacae	Enterobacter_xiangfangensis_NZ_CP017183 (97.1%)	VIII	190	I	IncL/M_IncR	absent	present	present	absent	E_xiangfangensis	L-1	RBG-18-0186-1	2-4	not done	not done	not done
RBG-18-0320-1	2018	blood	Giessen	E_cloacae	Enterobacter_xiangfangensis_NZ_CP017183 (97.1%)	VIII	539	I	NA	absent	present	present	absent	E_xiangfangensis	L-1	RBG-18-0320-1	4-16	not done	not done	not done
RBK-17-0014-2	2017	blood	Cologne	E_cloacae	Enterobacter_xiangfangensis_NZ_CP017183 (97.07%)	VIII	175	I	NA	absent	present	present	absent	E_xiangfangensis	L-1	RBK-17-0014-2	2-4	not done	not done	not done
RBK-17-0221-2	2017	blood	Cologne	E_cloacae	Enterobacter_xiangfangensis_NZ_CP017183 (97.07%)	VIII	65	I	NA	absent	present	present	SHV-134	E_xiangfangensis	L-1	RBK-17-0221-2	4-8	not done	not done	not done
RBK-17-0230-1	2017	blood	Cologne	E_cloacae	Enterobacter_xiangfangensis_NZ_CP017183 (97.1%)	VIII	50	I	NA	absent	present	present	absent	E_xiangfangensis	L-1	RBK-17-0230-1	4-16	256	0.00 ± 0.00	0.00 ± 0.00
RBK-17-0305-1	2017	blood	Cologne	E_cloacae	Enterobacter_xiangfangensis_NZ_CP017183 (97.09%)	VIII	664	I	IncR	absent	present	present	absent	E_xiangfangensis	L-1	RBK-17-0305-1	4-8	not done	not done	not done
RBK-17-0375-1	2017	blood	Cologne	E_cloacae	Enterobacter_xiangfangensis_NZ_CP017183 (97.1%)	VIII	539	I	NA	absent	present	present	absent	E_xiangfangensis	L-1	RBK-17-0375-1	4-16	not done	not done	not done
RBK-17-0394-1	2017	blood	Cologne	E_cloacae	Enterobacter_xiangfangensis_NZ_CP017183 (97.11%)	VIII	190	I	NA	absent	present	present	absent	E_xiangfangensis	L-1	RBK-17-0394-1	2-32	256-512	0.75 ± 0.27	0.50 ± 0.15
RBK-17-0399-1	2017	blood	Cologne	E_cloacae	Enterobacter_xiangfangensis_NZ_CP017183 (97.1%)	VIII	50	I	NA	absent	present	present	absent	E_xiangfangensis	L-1	RBK-17-0399-1	4-8	not done	not done	not done
RBK-17-0497-1	2017	blood	Cologne	E_cloacae	Enterobacter_xiangfangensis_NZ_CP017183 (97.08%)	VIII	113	I	IncFIB_IncFII_IncHI2_IncHI2A_IncN	absent	present	present	SHV-134,VIM-1	E_xiangfangensis	L-1	RBK-17-0497-1	4-8	not done	not done	not done
RBK-18-0264-1	2018	blood	Cologne	E_cloacae	Enterobacter_xiangfangensis_NZ_CP017183 (97.09%)	VIII	972	I	NA	absent	present	present	absent	E_xiangfangensis	L-1	RBK-18-0264-1	4-16	not done	not done	not done
RBK-18-0386-2	2018	blood	Cologne	E_cloacae	Enterobacter_xiangfangensis_NZ_CP017183 (97.11%)	VIII	1309	I	Col	absent	present	present	absent	E_xiangfangensis	L-1	RBK-18-0386-2	4	128	0.00 ± 0.00	0.00 ± 0.00
RBL-16-0059-1	2016	blood	Lubeck	E_cloacae	Enterobacter_xiangfangensis_NZ_CP017183 (97.1%)	VIII	190	I	IncFIC_IncFII	absent	present	present	absent	E_xiangfangensis	L-1	RBL-16-0059-1	4-64	not done	not done	not done
RBL-17-0079-1	2017	blood	Lubeck	E_spp	Enterobacter_xiangfangensis_NZ_CP017183 (97.08%)	VIII	190	I	NA	absent	present	present	absent	E_xiangfangensis	L-1	RBL-17-0079-1	4-8	not done	not done	not done
RBL-17-0180-1	2017	blood	Lubeck	E_cloacae	Enterobacter_xiangfangensis_NZ_CP017183 (97.07%)	VIII	134	I	NA	absent	present	present	absent	E_xiangfangensis	L-1	RBL-17-0180-1	4-8	not done	not done	not done
RBL-17-0250-3	2017	blood	Lubeck	E_cloacae	Enterobacter_xiangfangensis_NZ_CP017183 (97.08%)	VIII	62	I	IncN	absent	present	present	absent	E_xiangfangensis	L-1	RBL-17-0250-3	2-4.(phoQ*)	not done	not done	not done
RBL-17-0286-1	2017	blood	Lubeck	E_cloacae	Enterobacter_xiangfangensis_NZ_CP017183 (97.09%)	VIII	50	I	NA	absent	present	present	absent	E_xiangfangensis	L-1	RBL-17-0286-1	4-8	not done	not done	not done
RBL-17-0384-1	2017	blood	Lubeck	E_cloacae	Enterobacter_xiangfangensis_NZ_CP017183 (97.09%)	VIII	1296	I	NA	absent	present	present	absent	E_xiangfangensis	L-1	RBL-17-0384-1	2-8	not done	not done	not done
RBL-17-0437-1	2017	blood	Lubeck	E_cloacae	Enterobacter_xiangfangensis_NZ_CP017183 (97.08%)	VIII	90	I	IncHI2_IncHI2A	present	present	present	SHV-134	E_xiangfangensis	L-1	RBL-17-0437-1	2-8	64-256	0.04 ± 0.00	0.01 ± 0.00
RBL-18-0073-1	2018	blood	Lubeck	E_cloacae	Enterobacter_xiangfangensis_NZ_CP017183 (97.13%)	VIII	1297	I	NA	absent	present	present	absent	E_xiangfangensis	L-1	RBL-18-0073-1	4-16	not done	not done	not done
RBL-18-0346-1	2018	blood	Lubeck	E_cloacae	Enterobacter_xiangfangensis_NZ_CP017183 (97.09%)	VIII	89	I	IncHI2_IncHI2A	absent	present	present	absent	E_xiangfangensis	L-1	RBL-18-0346-1	64-128	not done	not done	not done
RPB-17-0076-1	2017	rectal swab	Berlin	E_cloacae	Enterobacter_xiangfangensis_NZ_CP017183 (97.13%)	VIII	177	I	IncFIB	absent	present	present	absent	E_xiangfangensis	L-1	RPB-17-0076-1	4-16	not done	not done	not done
RPB-17-0198-1	2017	rectal swab	Berlin	E_cloacae	Enterobacter_xiangfangensis_NZ_CP017183 (97.07%)	VIII	517	I	NA	absent	present	present	absent	E_xiangfangensis	L-1	RPB-17-0198-1	2-16	not done	not done	not done
RPB-17-0209-1	2017	rectal swab	Berlin	E_cloacae	Enterobacter_xiangfangensis_NZ_CP017183 (97.11%)	VIII	1115	I	NA	absent	present	present	absent	E_xiangfangensis	L-1	RPB-17-0209-1	not done	not done	not done	not done
RPB-17-0356-1	2017	rectal swab	Berlin	E_cloacae	Enterobacter_xiangfangensis_NZ_CP017183 (97.07%)	VIII	50	I	NA	absent	present	present	absent	E_xiangfangensis	L-1	RPB-17-0356-1	4-128	not done	not done	not done
RPB-17-0516-3	2017	rectal swab	Berlin	E_cloacae	Enterobacter_xiangfangensis_NZ_CP017183 (97.04%)	VIII	742	I	IncFIB_IncFII	absent	present	present	absent	E_xiangfangensis	L-1	RPB-17-0516-3	4-16	not done	not done	not done
RPB-18-0140-1	2018	rectal swab	Berlin	E_cloacae	Enterobacter_xiangfangensis_NZ_CP017183 (97.05%)	VIII	1264	I	NA	absent	present	present	absent	E_xiangfangensis	L-1	RPB-18-0140-1	64	256	0.00 ± 0.00	0.00 ± 0.00
RPB-18-0151-1	2018	rectal swab	Berlin	E_cloacae	Enterobacter_xiangfangensis_NZ_CP017183 (97.08%)	VIII	50	I	IncFIB_IncFII	absent	present	present	absent	E_xiangfangensis	L-1	RPB-18-0151-1	64	256	0.69 ± 0.00	0.01 ± 0.00
RPB-18-0431-2	2018	rectal swab	Berlin	E_cloacae	Enterobacter_xiangfangensis_NZ_CP017183 (97.06%)	VIII	1305	I	IncFIB_IncFII_IncR	absent	present	present	absent	E_xiangfangensis	L-1	RPB-18-0431-2	not done	not done	not done	not done
RPB-18-0510-1	2018	rectal swab	Berlin	E_cloacae	Enterobacter_xiangfangensis_NZ_CP017183 (97.1%)	VIII	533	I	IncFIB_IncFII	absent	present	present	absent	E_xiangfangensis	L-1	RPB-18-0510-1	not done	not done	not done	not done
RPF-17-0168-1	2017	rectal swab	Freiburg	E_cloacae	Enterobacter_xiangfangensis_NZ_CP017183 (97.08%)	VIII	190	I	IncFIB	absent	present	present	absent	E_xiangfangensis	L-1	RPF-17-0168-1	1-8	not done	not done	not done
RPF-17-0249-1	2017	rectal swab	Freiburg	E_cloacae	Enterobacter_xiangfangensis_NZ_CP017183 (97.1%)	VIII	90	I	IncHI2_IncHI2A	present	present	present	absent	E_xiangfangensis	L-1	RPF-17-0249-1	4-8	not done	not done	not done
RPF-17-0260-1	2017	rectal swab	Freiburg	E_cloacae	Enterobacter_xiangfangensis_NZ_CP017183 (97.08%)	VIII	65	I	IncHI2_IncHI2A	present	present	present	absent	E_xiangfangensis	L-1	RPF-17-0260-1	4-8	64-256	0.02 ± 0.00	0.00 ± 0.00
RPF-18-0225-1	2018	rectal swab	Freiburg	E_cloacae	Enterobacter_xiangfangensis_NZ_CP017183 (97.07%)	VIII	116	I	NA	absent	present	present	absent	E_xiangfangensis	L-1	RPF-18-0225-1	64	128	0.00 ± 0.00	0.00 ± 0.00
RPK-16-0522-1	2016	rectal swab	Cologne	E_cloacae	Enterobacter_xiangfangensis_NZ_CP017183 (97.11%)	VIII	190	I	NA	absent	present	present	absent	E_xiangfangensis	L-1	RPK-16-0522-1	4-16	not done	not done	not done
RPK-17-0325-1	2017	rectal swab	Cologne	E_cloacae	Enterobacter_xiangfangensis_NZ_CP017183 (97.11%)	VIII	50	I	NA	absent	present	present	absent	E_xiangfangensis	L-1	RPK-17-0325-1	4-16	not done	not done	not done
RPK-17-0332-1	2017	rectal swab	Cologne	E_cloacae	Enterobacter_xiangfangensis_NZ_CP017183 (97.12%)	VIII	133	I	NA	absent	absent	present	absent	E_xiangfangensis	L-1	RPK-17-0332-1	2-4	not done	not done	not done
RPK-17-0437-2	2017	rectal swab	Cologne	E_cloacae	Enterobacter_xiangfangensis_NZ_CP017183 (97.1%)	VIII	1293	I	IncFII	absent	present	present	absent	E_xiangfangensis	L-1	RPK-17-0437-2	16-32	256-512	0.10 ± 0.00	0.00 ± 0.00
RPK-18-0360-1	2018	rectal swab	Cologne	E_cloacae	Enterobacter_xiangfangensis_NZ_CP017183 (97.09%)	VIII	50	I	IncFIB_IncFII	absent	present	present	absent	E_xiangfangensis	L-1	RPK-18-0360-1	64	256	0.00 ± 0.00	0.00 ± 0.00
RPL-16-0286-1	2016	rectal swab	Lubeck	E_cloacae	Enterobacter_xiangfangensis_NZ_CP017183 (97.1%)	VIII	190	I	NA	absent	present	present	absent	E_xiangfangensis	L-1	RPL-16-0286-1	64	256	0.34 ± 0.00	0.00 ± 0.00
RPL-17-0177-1	2017	rectal swab	Lubeck	E_cloacae	Enterobacter_xiangfangensis_NZ_CP017183 (97.08%)	VIII	134	I	IncFIB	absent	present	present	absent	E_xiangfangensis	L-1	RPL-17-0177-1	8-16	not done	not done	not done
RPT-16-0054-1	2016	rectal swab	Tubingen	E_cloacae	Enterobacter_xiangfangensis_NZ_CP017183 (97.06%)	VIII	1300	I	NA	absent	present	present	absent	E_xiangfangensis	L-1	RPT-16-0054-1	not done	not done	not done	not done
BK6046	2013	blood	Tubingen	E_spp	Enterobacter_xiangfangensis_NZ_CP017183 (95.64%)	III	1316	II	IncR	absent	absent	absent	absent	E_xiangfangensis	L-2	BK6046	2-4	2-4	0.00 ± 0.00	0.00 ± 0.00
RBB-16-0116-1	2016	blood	Berlin	E_cloacae	Enterobacter_xiangfangensis_NZ_CP017183 (95.6%)	III	104	II	NA	absent	absent	absent	absent	E_xiangfangensis	L-2	RBB-16-0116-1	2-4	2-4	0.00 ± 0.00	0.00 ± 0.00
RBB-17-0902-1	2017	blood	Berlin	E_spp	Enterobacter_xiangfangensis_NZ_CP017183 (95.62%)	III	102	II	IncN	absent	absent	absent	absent	E_xiangfangensis	L-2	RBB-17-0902-1	2-4	2-4	0.00 ± 0.00	0.00 ± 0.00
RBF-17-0511-1	2017	blood	Freiburg	E_cloacae	Enterobacter_xiangfangensis_NZ_CP017183 (95.64%)	III	419	II	NA	absent	absent	absent	absent	E_xiangfangensis	L-2	RBF-17-0511-1	2-4	2-4	0.00 ± 0.00	0.00 ± 0.00
RBF-18-0052-1	2018	blood	Freiburg	E_cloacae	Enterobacter_xiangfangensis_NZ_CP017183 (95.62%)	III	419	II	IncHI2_IncHI2A	absent	absent	absent	absent	E_xiangfangensis	L-2	RBF-18-0052-1	2-4	2-4	0.00 ± 0.00	0.00 ± 0.00
RBF-18-0266-1	2018	blood	Freiburg	E_cloacae	Enterobacter_xiangfangensis_NZ_CP017183 (95.59%)	III	1277	II	pENTAS02	absent	absent	absent	absent	E_xiangfangensis	L-2	RBF-18-0266-1	2-4	4-8	0.00 ± 0.00	0.00 ± 0.00
RBF-18-0378-1	2018	blood	Freiburg	E_cloacae	Enterobacter_xiangfangensis_NZ_CP017183 (95.6%)	III	78	II	NA	absent	absent	absent	absent	E_xiangfangensis	L-2	RBF-18-0378-1	2-4	2-4	0.00 ± 0.00	0.00 ± 0.00
RBG-17-0085-1	2017	blood	Giessen	E_cloacae	Enterobacter_xiangfangensis_NZ_CP017183 (95.62%)	III	168	II	IncFIB	absent	absent	absent	absent	E_xiangfangensis	L-2	RBG-17-0085-1	2-4	2-4	0.00 ± 0.00	0.00 ± 0.00
RBG-17-0358-1	2017	blood	Giessen	E_cloacae	Enterobacter_xiangfangensis_NZ_CP017183 (95.59%)	III	168	II	NA	absent	absent	absent	absent	E_xiangfangensis	L-2	RBG-17-0358-1	2-4	4-8	0.00 ± 0.00	0.00 ± 0.00
RBG-17-0389-1	2017	blood	Giessen	E_cloacae	Enterobacter_xiangfangensis_NZ_CP017183 (95.59%)	III	168	II	IncFIB	absent	absent	absent	absent	E_xiangfangensis	L-2	RBG-17-0389-1	2-4	2-4	0.00 ± 0.00	0.00 ± 0.00
RBK-16-0078-3	2016	blood	Cologne	E_cloacae	Enterobacter_xiangfangensis_NZ_CP017183 (95.61%)	III	104	II	FIA_IncFIA_IncL/M_IncR	absent	absent	absent	absent	E_xiangfangensis	L-2	RBK-16-0078-3	2-4	2-4	0.00 ± 0.00	0.00 ± 0.00
RBL-17-0146-1	2017	blood	Lubeck	E_cloacae	Enterobacter_xiangfangensis_NZ_CP017183 (95.57%)	III	233	II	IncFII	absent	absent	absent	absent	E_xiangfangensis	L-2	RBL-17-0146-1	4	4	0.00 ± 0.00	0.00 ± 0.00
RBL-17-0167-1	2017	blood	Lubeck	E_cloacae	Enterobacter_xiangfangensis_NZ_CP017183 (95.6%)	III	278	II	NA	absent	absent	absent	absent	E_xiangfangensis	L-2	RBL-17-0167-1	2-4	4	0.00 ± 0.00	0.00 ± 0.00
RBL-18-0072-1	2018	blood	Lubeck	E_cloacae	Enterobacter_xiangfangensis_NZ_CP017183 (95.67%)	III	327	II	NA	absent	absent	absent	absent	E_xiangfangensis	L-2	RBL-18-0072-1	2-4	2-4	0.00 ± 0.00	0.00 ± 0.00
RBL-18-0073-2	2018	blood	Lubeck	E_cloacae	Enterobacter_xiangfangensis_NZ_CP017183 (95.6%)	III	118	II	FIA_IncFIA_IncFIB	absent	absent	absent	absent	E_xiangfangensis	L-2	RBL-18-0073-2	4	8	0.00 ± 0.00	0.00 ± 0.00
RBL-18-0082-1	2018	blood	Lubeck	E_cloacae	Enterobacter_xiangfangensis_NZ_CP017183 (95.6%)	III	135	II	NA	present	absent	absent	absent	E_xiangfangensis	L-2	RBL-18-0082-1	2-4	2-4	0.00 ± 0.00	0.00 ± 0.00
RBL-18-0105-1	2018	blood	Lubeck	E_cloacae	Enterobacter_xiangfangensis_NZ_CP017183 (95.62%)	III	78	II	IncFIB	absent	absent	absent	SHV-134	E_xiangfangensis	L-2	RBL-18-0105-1	2-4	4-8	0.00 ± 0.00	0.00 ± 0.00
RPB-17-0441-1	2017	rectal swab	Berlin	E_cloacae	Enterobacter_xiangfangensis_NZ_CP017183 (95.6%)	III	1199	II	NA	absent	absent	absent	absent	E_xiangfangensis	L-2	RPB-17-0441-1	2-4	4-8	0.00 ± 0.00	0.00 ± 0.00
RPB-18-0456-1	2018	rectal swab	Berlin	E_cloacae	Enterobacter_xiangfangensis_NZ_CP017183 (95.64%)	III	118	II	FIA_IncFIA_IncFIB	absent	absent	absent	absent	E_xiangfangensis	L-2	RPB-18-0456-1	2-4	4-8	0.00 ± 0.00	0.00 ± 0.00
RPF-18-0104-1	2018	rectal swab	Freiburg	E_cloacae	Enterobacter_xiangfangensis_NZ_CP017183 (95.59%)	III	1280	II	IncHI2_IncHI2A	present	absent	absent	absent	E_xiangfangensis	L-2	RPF-18-0104-1	2-4	2-4	0.00 ± 0.00	0.00 ± 0.00
RPF-18-0297-1	2018	rectal swab	Freiburg	E_cloacae	Enterobacter_xiangfangensis_NZ_CP017183 (95.62%)	III	1283	II	IncFIB_IncFII	absent	absent	absent	absent	E_xiangfangensis	L-2	RPF-18-0297-1	2-4	2-4	0.00 ± 0.00	0.00 ± 0.00
RPK-18-0503-1	2018	rectal swab	Cologne	E_cloacae	Enterobacter_xiangfangensis_NZ_CP017183 (95.59%)	III	118	II	NA	absent	absent	absent	absent	E_xiangfangensis	L-2	RPK-18-0503-1	2-4	2-4	0.00 ± 0.00	0.00 ± 0.00
RPL-18-0075-1	2018	rectal swab	Lubeck	E_cloacae	Enterobacter_xiangfangensis_NZ_CP017183 (95.64%)	III	97	II	IncFIB_IncFII_IncN_IncR	absent	absent	absent	absent	E_xiangfangensis	L-2	RPL-18-0075-1	2-4	4-8	0.00 ± 0.00	0.00 ± 0.00
RPL-18-0211-3	2018	rectal swab	Lubeck	E_cloacae	Enterobacter_xiangfangensis_NZ_CP017183 (95.6%)	III	1315	II	NA	absent	absent	absent	absent	E_xiangfangensis	L-2	RPL-18-0211-3	2-4	2-4	0.00 ± 0.00	0.00 ± 0.00
RPT-16-0254-2	2016	rectal swab	Tubingen	E_cloacae	Enterobacter_xiangfangensis_NZ_CP017183 (95.6%)	III	1148	II	NA	absent	absent	absent	absent	E_xiangfangensis	L-2	RPT-16-0254-2	2-4	2-4	0.00 ± 0.00	0.00 ± 0.00
RPT-17-0081-1	2017	rectal swab	Tubingen	E_cloacae	Enterobacter_xiangfangensis_NZ_CP017183 (95.61%)	III	78	II	NA	absent	absent	absent	absent	E_xiangfangensis	L-2	RPT-17-0081-1	2-4	4-8	0.00 ± 0.00	0.00 ± 0.00
And1463	2011	(catheter) urine	Berlin	E_cloacae	Enterobacter_xiangfangensis_NZ_CP017183 (99.22%)	VI	-	III	IncFII_IncHI2_IncHI2A	absent	absent	absent	absent	E_xiangfangensis	L-3	And1463	2-4	4-8	0.00 ± 0.00	0.00 ± 0.00
And2481	2013	C-Flasche?	Berlin	E_cloacae_complex	Enterobacter_xiangfangensis_NZ_CP017183 (99.23%)	VI	182	III	IncFIB_IncFII	absent	absent	absent	absent	E_xiangfangensis	L-3	And2481	2-4	2-4	0.00 ± 0.00	0.00 ± 0.00
And2854	2013	rectal swab	Berlin	E_cloacae	Enterobacter_xiangfangensis_NZ_CP017183 (99.27%)	VI	1265	III	IncR	absent	absent	absent	absent	E_xiangfangensis	L-3	And2854	2-4	2-4	0.00 ± 0.00	0.00 ± 0.00
And6885	2015	rectal swab	Berlin	E_cloacae	Enterobacter_xiangfangensis_NZ_CP017183 (99.22%)	VI	144	III	IncFIB_IncFII	absent	absent	absent	absent	E_xiangfangensis	L-3	And6885	2-4	2-4	0.00 ± 0.00	0.00 ± 0.00
RBF-17-0256-1	2017	blood	Freiburg	E_cloacae	Enterobacter_xiangfangensis_NZ_CP017183 (99.94%)	VI	121	III	IncFIB_IncHI2_IncHI2A_IncL/M_IncX3	absent	absent	absent	NDM-7	E_xiangfangensis	L-3	RBF-17-0256-1	2-4	2-4	0.00 ± 0.00	0.00 ± 0.00
RBF-18-0224-1	2018	blood	Freiburg	E_cloacae	Enterobacter_xiangfangensis_NZ_CP017183 (99.24%)	VI	511	III	IncHI2_IncHI2A	present	absent	absent	absent	E_xiangfangensis	L-3	RBF-18-0224-1	2-4	2-4	0.00 ± 0.00	0.00 ± 0.00
RBG-18-0378-1	2018	blood	Giessen	E_cloacae	Enterobacter_xiangfangensis_NZ_CP017183 (99.23%)	VI	344	III	NA	absent	absent	absent	absent	E_xiangfangensis	L-3	RBG-18-0378-1	2-4	4-8	0.00 ± 0.00	0.00 ± 0.00
RBK-18-0208-1	2018	blood	Cologne	E_cloacae	Enterobacter_xiangfangensis_NZ_CP017183 (99.26%)	VI	296	III	IncFIB_IncFII	absent	absent	absent	absent	E_xiangfangensis	L-3	RBK-18-0208-1	4	8	0.00 ± 0.00	0.00 ± 0.00
RBL-17-0419-2	2017	blood	Lubeck	E_cloacae	Enterobacter_xiangfangensis_NZ_CP017183 (99.32%)	VI	986	III	NA	absent	absent	absent	absent	E_xiangfangensis	L-3	RBL-17-0419-2	4	8	0.00 ± 0.00	0.00 ± 0.00
RPB-18-0433-1	2018	rectal swab	Berlin	E_cloacae	Enterobacter_xiangfangensis_NZ_CP017183 (99.29%)	VI	120	III	IncFIB_IncFII_IncR	absent	absent	absent	absent	E_xiangfangensis	L-3	RPB-18-0433-1	2-4	2-4	0.00 ± 0.00	0.00 ± 0.00
RPF-18-0265-1	2018	rectal swab	Freiburg	E_cloacae	Enterobacter_xiangfangensis_NZ_CP017183 (99.31%)	VI	1282	III	NA	absent	absent	absent	absent	E_xiangfangensis	L-3	RPF-18-0265-1	2-4	4-8	0.00 ± 0.00	0.00 ± 0.00
RBF-16-0042-1	2016	blood	Freiburg	E_cloacae	Enterobacter_xiangfangensis_NZ_CP017183 (97.15%)	VI	68	IV	NA	absent	absent	absent	absent	E_xiangfangensis	L-4	RBF-16-0042-1	2-4	4-8	0.00 ± 0.00	0.00 ± 0.00
RBG-18-0241-1	2018	blood	Giessen	E_cloacae	Enterobacter_xiangfangensis_NZ_CP017183 (97.25%)	VI	68	IV	IncFIB_IncFII_pENTAS02	absent	absent	absent	absent	E_xiangfangensis	L-4	RBG-18-0241-1	2-4	2-4	0.00 ± 0.00	0.00 ± 0.00
RBK-17-0398-1	2017	blood	Cologne	E_cloacae	Enterobacter_xiangfangensis_NZ_CP017183 (97.12%)	VI	108	IV	FIA_IncFIA	absent	absent	absent	absent	E_xiangfangensis	L-4	RBK-17-0398-1	2-4	2-4	0.00 ± 0.00	0.00 ± 0.00
RBL-17-0298-1	2017	blood	Lubeck	E_cloacae	Enterobacter_xiangfangensis_NZ_CP017183 (97.11%)	VI	108	IV	IncFIB	absent	absent	absent	absent	E_xiangfangensis	L-4	RBL-17-0298-1	2-4	4-8	0.00 ± 0.00	0.00 ± 0.00
RBL-17-0312-2	2017	blood	Lubeck	E_cloacae	Enterobacter_xiangfangensis_NZ_CP017183 (97.14%)	VI	108	IV	NA	absent	absent	absent	absent	E_xiangfangensis	L-4	RBL-17-0312-2	2-4	4	0.00 ± 0.00	0.00 ± 0.00
RBL-18-0138-1	2018	blood	Lubeck	E_cloacae	Enterobacter_xiangfangensis_NZ_CP017183 (97.14%)	VI	108	IV	IncFIB	absent	absent	absent	absent	E_xiangfangensis	L-4	RBL-18-0138-1	2-4	2-4	0.00 ± 0.00	0.00 ± 0.00
RPB-18-0431-1	2018	rectal swab	Berlin	E_cloacae	Enterobacter_xiangfangensis_NZ_CP017183 (97.13%)	VI	108	IV	IncFIB_IncFII_IncR	absent	absent	absent	absent	E_xiangfangensis	L-4	RPB-18-0431-1	2-4	2-4	0.00 ± 0.00	0.00 ± 0.00
F-147	2014	blood	Cologne	E_asburiae	Enterobacter_vonholyi_VTUC01 (98.63%)	IV	1267		IncFIB_IncR	absent	present	absent	absent	E_vonholyi		F-147	2-4.(phoQ*)	32	0.00 ± 0.00	0.00 ± 0.00
RBL-17-0354-2	2017	blood	Lubeck	E_cloacae	Enterobacter_tabaci_QZDQ01 (97.77%)	XIII	1295		IncFII	absent	present	absent	absent	E_mori		RBL-17-0354-2	32-64	256-512	1.2 ± 0.24	0.54 ± 0.01
RBK-17-0344-2	2017	blood	Cologne	E_cloacae	Enterobacter_roggenkampii_NZ_CP017184 (98.54%)	IV	1292		NA	absent	present	absent	absent	E_roggenkampii		RBK-17-0344-2	>512	512	0.72 ± 0.55	3.92 ± 2.52
RPB-17-0516-2	2017	rectal swab	Berlin	E_cloacae	Enterobacter_roggenkampii_NZ_CP017184 (98.55%)	IV	1201		NA	absent	present	absent	absent	E_roggenkampii		RPB-17-0516-2	64->128	>512	2.17 ± 0.55	0.89 ± 0.17
RPG-17-0579-1	2017	rectal swab	Giessen	E_cloacae	Enterobacter_roggenkampii_NZ_CP017184 (98.56%)	IV	272		IncFIB_IncFII	absent	present	absent	absent	E_roggenkampii		RPG-17-0579-1	>512	>512	2.01 ± 1.19	5.38 ± 3.62
RPK-16-0191-2	2016	rectal swab	Cologne	E_spp	Enterobacter_roggenkampii_NZ_CP017184 (98.5%)	IV	515		NA	absent	present	absent	absent	E_roggenkampii		RPK-16-0191-2	64	256	0.00 ± 0.00	0.00 ± 0.00
RPK-18-0173-1	2018	rectal swab	Cologne	E_asburiae	Enterobacter_roggenkampii_NZ_CP017184 (98.54%)	IV	165		NA	absent	present	absent	absent	E_roggenkampii		RPK-18-0173-1	not done	not yet done	not yet done	not yet done
RPK-18-0503-2	2018	rectal swab	Cologne	E_asburiae	Enterobacter_roggenkampii_NZ_CP017184 (98.49%)	IV	1294		IncFIB_IncFII	absent	present	absent	absent	E_roggenkampii		RPK-18-0503-2	>512	>512	9.70 ± 4.05	3.51 ± 3.69
RPK-18-0524-1	2018	rectal swab	Cologne	E_asburiae	Enterobacter_roggenkampii_NZ_CP017184 (98.5%)	IV	466		NA	absent	present	absent	absent	E_roggenkampii		RPK-18-0524-1	256	512	0.12 ± 0.13	0.24 ± 0.27
RPT-17-0298-1	2017	rectal swab	Tubingen	E_cloacae	Enterobacter_roggenkampii_NZ_CP017184 (98.58%)	IV	1302		FIA_IncFIA_IncFII	absent	present	absent	absent	E_roggenkampii		RPT-17-0298-1	not done	not yet done	not yet done	not yet done
RPT-18-0057-1	2018	rectal swab	Tubingen	E_cloacae	Enterobacter_roggenkampii_NZ_CP017184 (98.32%)	IV	41		IncFIB_IncFII_IncR	absent	present	absent	absent	E_roggenkampii		RPT-18-0057-1	128-256	512	0.08 ± 0.13	0.00 ± 0.00
F00728	2013	blood	Cologne	E_cloacae	Enterobacter_wuhouensis_SJON01 (98.76%)	new	1270		IncFIB	absent	absent	absent	absent	E_wuhouensis		F00728	4-6.(lack arn)	8	0.00 ± 0.00	0.00 ± 0.00
And4961	2014	rectal swab	Berlin	E_cloacae	Enterobacter_ludwigii_NZ_CP017279 (98.88%)	V	374		IncFIB	absent	present	absent	absent	E_ludwigii		And4961	128	512	0.11 ± 0.18	0.00 ± 0.00
BK6227	2014	blood	Tubingen	E_spp	Enterobacter_ludwigii_NZ_CP017279 (98.93%)	V	1271		NA	absent	present	absent	absent	E_ludwigii		BK6227	64	256-512	0.00 ± 0.00	0.00 ± 0.00
F-8789	2012	blood	Cologne	E_cloacae	Enterobacter_ludwigii_NZ_CP017279 (98.94%)	V	1269		NA	absent	present	absent	absent	E_ludwigii		F-8789	8-64	512	0.02 ± 0.01	0.00 ± 0.00
RBF-17-0584-3	2017	blood	Freiburg	E_cloacae	Enterobacter_ludwigii_NZ_CP017279 (98.85%)	V	1273		NA	absent	present	absent	absent	E_ludwigii		RBF-17-0584-3	64	512	0.00 ± 0.00	0.00 ± 0.00
RBF-18-0023-1	2018	blood	Freiburg	E_cloacae	Enterobacter_ludwigii_NZ_CP017279 (98.92%)	V	1274		NA	absent	present	absent	absent	E_ludwigii		RBF-18-0023-1	128	256	0.00 ± 0.00	0.00 ± 0.00
RBF-18-0074-1	2018	blood	Freiburg	E_cloacae	Enterobacter_ludwigii_NZ_CP017279 (98.88%)	V	1275		NA	absent	present	absent	absent	E_ludwigii		RBF-18-0074-1	128	256	0.00 ± 0.00	0.00 ± 0.00
RBF-18-0271-1	2018	blood	Freiburg	E_cloacae	Enterobacter_ludwigii_NZ_CP017279 (98.88%)	V	1278		RepA	absent	present	absent	absent	E_ludwigii		RBF-18-0271-1	128	512	0.00 ± 0.00	0.00 ± 0.00
RBF-18-0335-1	2018	blood	Freiburg	E_cloacae	Enterobacter_ludwigii_NZ_CP017279 (98.87%)	V	1287		NA	absent	present	absent	absent	E_ludwigii		RBF-18-0335-1	64	512	0.00 ± 0.00	0.00 ± 0.00
RBG-17-0309-2	2017	blood	Giessen	E_cloacae	Enterobacter_ludwigii_NZ_CP017279 (98.9%)	V	1307		NA	absent	present	absent	absent	E_ludwigii		RBG-17-0309-2	32	256	0.01 ± 0.02	0.00 ± 0.00
RBG-18-0242-1	2018	blood	Giessen	E_ludwigii	Enterobacter_ludwigii_NZ_CP017279 (98.76%)	V	1286		IncFII	absent	present	absent	absent	E_ludwigii		RBG-18-0242-1	64	512	0.00 ± 0.00	0.00 ± 0.00
RBL-18-0029-2	2018	blood	Lubeck	E_cloacae	Enterobacter_ludwigii_NZ_CP017279 (98.89%)	V	253		NA	absent	present	absent	absent	E_ludwigii		RBL-18-0029-2	64	128	0.00 ± 0.00	0.00 ± 0.00
RBL-18-0307-1	2018	blood	Lubeck	E_cloacae	Enterobacter_ludwigii_NZ_CP017279 (98.9%)	V	1298		NA	absent	present	absent	absent	E_ludwigii		RBL-18-0307-1	128	>512	0.00 ± 0.00	0.00 ± 0.00
RBL-18-0461-2	2018	blood	Lubeck	E_cloacae	Enterobacter_ludwigii_NZ_CP017279 (98.91%)	V	1314		NA	absent	present	absent	absent	E_ludwigii		RBL-18-0461-2	64-128	512	0.00 ± 0.00	0.00 ± 0.00
RPB-16-0320-1	2016	rectal swab	Berlin	E_cloacae	Enterobacter_ludwigii_NZ_CP017279 (98.91%)	V	1200		IncFIB_IncFII_RepA	present	present	absent	absent	E_ludwigii		RPB-16-0320-1	64	256	0.06 ± 0.00	0.01 ± 0.00
RPB-18-0460-1	2018	rectal swab	Berlin	E_cloacae	Enterobacter_ludwigii_NZ_CP017279 (98.77%)	V	1306		NA	absent	present	absent	absent	E_ludwigii		RPB-18-0460-1	256	512	0.00 ± 0.00	0.00 ± 0.00
RPF-17-0222-2	2017	rectal swab	Freiburg	E_cloacae	Enterobacter_ludwigii_NZ_CP017279 (98.93%)	V	1290		IncFIB_IncFII	absent	present	absent	absent	E_ludwigii		RPF-17-0222-2	32	512	0.00 ± 0.00	0.00 ± 0.00
RPF-18-0247-1	2018	rectal swab	Freiburg	E_cloacae	Enterobacter_ludwigii_NZ_CP017279 (98.9%)	V	1281		NA	absent	present	absent	absent	E_ludwigii		RPF-18-0247-1	128-256	512	0.00 ± 0.00	0.00 ± 0.00
RPG-17-0504-1	2017	rectal swab	Giessen	E_cloacae	Enterobacter_ludwigii_NZ_CP017279 (98.92%)	V	1289		IncFIB	absent	present	present	absent	E_ludwigii		RPG-17-0504-1	128	512	1.07 ± 1.51	0.14 ± 0.16
RPG-17-0577-1	2017	rectal swab	Giessen	E_cloacae	Enterobacter_ludwigii_NZ_CP017279 (98.92%)	V	1290		IncFIB_IncFII	absent	present	absent	absent	E_ludwigii		RPG-17-0577-1	64	256	0.00 ± 0.00	0.00 ± 0.00
RPK-17-0322-2	2017	rectal swab	Cologne	E_cloacae	Enterobacter_ludwigii_NZ_CP017279 (98.93%)	V	1290		IncFIB_IncFII	absent	present	absent	absent	E_ludwigii		RPK-17-0322-2	64	256	0.00 ± 0.00	0.00 ± 0.00
RPK-18-0156-1	2018	rectal swab	Cologne	E_spp	Enterobacter_ludwigii_NZ_CP017279 (98.9%)	V	1311		NA	absent	present	absent	absent	E_ludwigii		RPK-18-0156-1	4	8	0.00 ± 0.00	0.00 ± 0.00
RPL-16-0036-1	2016	rectal swab	Lubeck	E_cloacae	Enterobacter_ludwigii_NZ_CP017279 (98.78%)	V	1299		IncFII	absent	present	absent	absent	E_ludwigii		RPL-16-0036-1	128	512	0.17 ± 0.15	0.11 ± 0.16
RPL-18-0213-1	2018	rectal swab	Lubeck	E_cloacae	Enterobacter_ludwigii_NZ_CP017279 (98.89%)	V	1145		IncHI2_IncHI2A	present	present	absent	absent	E_ludwigii		RPL-18-0213-1	64-128	256-512	0.00 ± 0.00	0.00 ± 0.00
BK6664	2014	abdominal puncture	Tubingen	E_spp	Enterobacter_kobei_NZ_CP017181 (99.4%)	II	56		NA	absent	present	absent	absent	E_kobei		BK6664	32	128	0.28 ± 0.08	0.11 ± 0.00
RBF-17-0338-1	2017	blood	Freiburg	E_cloacae	Enterobacter_kobei_NZ_CP017181 (99.11%)	II	1272		IncFIB	absent	present	absent	absent	E_kobei		RBF-17-0338-1	>512	256	0.00 ± 0.00	0.00 ± 0.00
RBG-16-0046-1	2016	blood	Giessen	E_cloacae	Enterobacter_kobei_NZ_CP017181 (99.22%)	II	1284		IncFIA	absent	present	absent	absent	E_kobei		RBG-16-0046-1	>512	>512	1.19 ± 0.38	0.55 ± 0.06
RBL-16-0092-1	2016	blood	Lubeck	E_spp	Enterobacter_kobei_NZ_CP017181 (99.21%)	II	125		NA	absent	present	absent	absent	E_kobei		RBL-16-0092-1	8	16	0.00 ± 0.00	0.00 ± 0.00
RBL-17-0362-1	2017	blood	Lubeck	E_spp	Enterobacter_kobei_NZ_CP017181 (99.18%)	II	125		IncFIB	absent	present	absent	absent	E_kobei		RBL-17-0362-1	>512	>512	0.00 ± 0.00	0.00 ± 0.00
RBL-18-0456-2	2018	blood	Lubeck	E_cloacae	Enterobacter_kobei_NZ_CP017181 (99.14%)	II	32		IncFIB_pENTAS02	absent	present	absent	absent	E_kobei		RBL-18-0456-2	>512	>512	0.00 ± 0.00	0.00 ± 0.00
RPB-18-0042-1	2018	rectal swab	Berlin	E_cloacae	Enterobacter_kobei_NZ_CP017181 (99.16%)	II	1263		NA	absent	present	absent	absent	E_kobei		RPB-18-0042-1	512	>512	0.00 ± 0.00	0.00 ± 0.00
RPK-18-0072-1	2018	rectal swab	Cologne	E_asburiae	Enterobacter_kobei_NZ_CP017181 (99.05%)	II	1310		IncFIB_IncFII	present	present	absent	absent	E_kobei		RPK-18-0072-1	>512	>512	0.26 ± 0.00	0.00 ± 0.00
RPL-18-0150-1	2018	rectal swab	Lubeck	E_cloacae	Enterobacter_kobei_NZ_CP017181 (99.13%)	II	490		RepA	absent	present	absent	absent	E_kobei		RPL-18-0150-1	>512	>512	0.28 ± 0.20	0.32 ± 0.24
ESBL2036	2011	PEG (percutaneous endoscopic gastrostomy)	Berlin	E_cloacae	Enterobacter_cloacae_NC_014121 (98.93%)	XI	1266		IncFIB_IncFII	absent	present	absent	absent	E_cloacae		ESBL2036	>512	>512	48.38 ± 14.22	24.09 ± 10.47
RBF-17-0514-1	2017	blood	Freiburg	E_cloacae	Enterobacter_cloacae_NC_014121 (98.69%)	XI	462		NA	absent	present	absent	absent	E_cloacae		RBF-17-0514-1	512	>512	0.00 ± 0.00	0.00 ± 0.00
RBL-17-0228-1	2017	blood	Lubeck	E_cloacae	Enterobacter_cloacae_NC_014121 (98.67%)	XI	1313		IncHI2_IncHI2A	absent	present	absent	absent	E_cloacae		RBL-17-0228-1	>512	512	17.16 ± 7.91	6.27 ± 3.46
RPK-18-0157-1	2018	rectal swab	Cologne	E_cloacae	Enterobacter_cloacae_NC_014121 (94.85%)	XII	1312		NA	absent	present	absent	absent	E_cloacae		RPK-18-0157-1	512	512	21.56 ± 2.87	11.12 ± 1.63
RBK-18-0141-1	2018	blood	Cologne	E_cloacae	Enterobacter_chengduensis_MTSO01 (95.42%)	IV	666		IncHI2_IncHI2A	present	present	absent	absent	E_chengduensis		RBK-18-0141-1	64-128	512->512	12.65 ± 2.30	7.89 ± 1.16
RPK-18-0479-1	2018	rectal swab	Cologne	E_cancerogenes	Enterobacter_cancerogenus_FYBA01 (98.88%)	XIII	-		IncFIB	absent	present	present	absent	E_cancerogenus		RPK-18-0479-1	64-128	512->512	1.78 ± 1.03	1.39 ± 1.15
BK7261	2015	blood	Tubingen	E_spp	Enterobacter_bugandensis_FYBI01 (98.64%)	IX	1317		IncFIB	absent	present	absent	absent	E_bugandensis		BK7261	>512	>512	25.80 ± 7.71	3.87 ± 0.99
F-1367	2019	blood	Cologne	E_cloacae	Enterobacter_bugandensis_FYBI01 (98.71%)	IX	795		NA	absent	present	absent	absent	E_bugandensis		F-1367	>512	>512	10.08 ± 7.67	5.28 ± 3.89
RBG-17-0246-1	2017	blood	Giessen	E_cloacae	Enterobacter_bugandensis_FYBI01 (98.47%)	IX	599		IncFIB_IncFII	absent	present	absent	absent	E_bugandensis		RBG-17-0246-1	64-128	512	10.41 ± 12.45	1.63 ± 0.37
RPF-18-0143-1	2018	rectal swab	Freiburg	E_cloacae	Enterobacter_bugandensis_FYBI01 (98.7%)	IX	1140		Col8282_IncFIB_IncFIC_IncFII	absent	present	absent	absent	E_bugandensis		RPF-18-0143-1	>512	>512	4.25 ± 2.96	2.53 ± 2.94
Survcare220	2019	throat-swab	Giessen	E_cloacae	Enterobacter_bugandensis_FYBI01 (98.69%)	IX	1140		IncFIB_IncFII	absent	present	absent	absent	E_bugandensis		Survcare220	>512	512	4.10 ± 3.74	2.77 ± 2.85
BK5433	2012	blood	Tubingen	E_spp	Enterobacter_asburiae_NZ_CP011863 (96.82%)	I	25		IncFIB_IncFII	absent	present	absent	absent	E_asburiae		BK5433	256	>512	5.30 ± 1.77	1.20 ± 0.19
RBG-18-0415-1	2018	blood	Giessen	E_cloacae	Enterobacter_asburiae_NZ_CP011863 (96.6%)	I	252		IncFIB_IncR	absent	present	absent	absent	E_asburiae		RBG-18-0415-1	128-256	512	0.44 ± 0.09	0.11 ± 0.03

## Sheet: (c) Illumina
Isolate	Forward_read	Reverse_read	Average_read_length	Coverage	Assembly_size	Assembly_coverage
And1463	2632063	2632063	135.273	142.419	5181151	81.2749
And2481	2363430	2363430	130.432	123.307	4786270	148.493
And2854	4109683	4109683	133.462	219.395	4643585	153.928
And4961	3316919	3316919	131.236	174.12	5024295	86.692
And6885	3085518	3085518	130.493	161.055	4808270	135.048
And8437	3194381	3194381	133.712	170.851	5092365	165.472
BK4615	2378236	2378236	128.459	122.202	4721720	200.354
BK4767	2263699	2263699	138.631	125.528	4826739	728.492
BK5433	1697715	1697715	125.051	84.9204	4630794	58.1066
BK6046	3142267	3142267	132.301	166.29	4942291	106.193
BK6227	1967683	1967683	136.555	107.479	4718365	62.6708
BK6664	2409075	2409075	136.524	131.559	4831497	79.7571
BK6928	3833204	3833204	135.74	208.128	4836012	175.083
BK7261	2003599	2003599	139.152	111.522	5110128	91.5569
ESBL2036	3064699	3064699	131.764	161.527	5077049	115.276
ESBL3012	2420458	2420458	133.169	128.932	4828534	70.8927
ESBL3620	3472856	3472856	126.834	176.19	4890112	108.587
ESBL5467	3348541	3348541	119.847	160.525	4773298	121.83
F00728	4644026	4644026	133.87	248.678	4653479	151.712
F03651	3304152	3304152	130.36	172.292	4801057	212.567
F-1367	3610967	3610967	132.47	191.338	4698617	143.018
F-147	3008948	3008948	133.192	160.307	4478713	97.6086
F-190	2513554	2513554	131.73	132.444	4696612	87.2379
F-232	3261775	3261775	134.913	176.022	4907869	299.303
F-8789	3678459	3678459	135.209	198.944	4756729	145.195
RBB-16-0116-1	3730422	2486948	132.793	165.125	4621840	146.586
RBB-17-0902-1	3281260	3281260	137.332	180.249	4918530	131.717
RBB-18-0493-1	765635	765635	135.377	41.4597	4485267	8.62325
RBF-16-0042-1	2961697	2961697	129.293	153.171	4572509	151.549
RBF-16-0075-1	523905	523905	129.841	27.2097	4675003	12.9512
RBF-17-0256-1	3911889	2607926	123.231	160.689	5302458	42.8226
RBF-17-0338-1	1472945	1472945	114.921	67.7089	5052924	77.0972
RBF-17-0511-1	3835841	3835841	131.482	201.738	4577463	115.979
RBF-17-0514-1	3560437	3560437	124.2	176.883	4825803	116.028
RBF-17-0584-3	1486207	1486207	143.442	85.2738	4820740	53.4122
RBF-18-0023-1	7282102	7282102	145.376	423.457	4672919	115.454
RBF-18-0052-1	7960266	7960266	143.77	457.779	4873057	115.522
RBF-18-0058-1	7889996	7889996	140.887	444.639	4800206	342.521
RBF-18-0074-1	11180069	11180069	130.599	584.042	4709565	182.002
RBF-18-0224-1	773074	773074	139.214	43.0491	4506428	7.88085
RBF-18-0266-1	3293125	3293125	145.952	192.255	4712117	93.7691
RBF-18-0271-1	3012049	3012049	129.63	156.181	5178426	84.5566
RBF-18-0288-1	2090959	2090959	144.947	121.231	4617108	30.1806
RBF-18-0302-3	8293035	8293035	141.228	468.483	4677786	455.405
RBF-18-0318-1	8006625	8006625	126.409	404.844	4641654	136.022
RBF-18-0335-1	2605822	2605822	141.424	147.41	4884420	37.9476
RBF-18-0378-1	5241613	5241613	120.56	252.772	4710287	237.517
RBF-18-0729-1	2129939	2129939	133.702	113.911	4725754	61.2369
RBG-16-0046-1	735735	735735	124.353	36.5963	4687150	15.8629
RBG-17-0018-1	4993092	4993092	104.781	209.272	4977691	41.2292
RBG-17-0085-1	4969673	4969673	109.962	218.59	4952788	334.614
RBG-17-0246-1	997820	997820	210.707	84.0991	5105279	51.6787
RBG-17-0257-1	3020279	3020279	141.55	171.008	4900720	90.9913
RBG-17-0272-1	552895	552895	246.062	54.4186	5098836	48.0759
RBG-17-0309-2	5427128	5427128	136.103	295.459	4806361	177.792
RBG-17-0345-1	1590574	1590574	138.644	88.2094	5061878	49.4135
RBG-17-0358-1	1720711	1720711	251.639	173.199	4774711	49.7849
RBG-17-0389-1	4769237	4769237	133.555	254.782	4914516	205.725
RBG-18-0107-1	2759777	2759777	121.344	133.953	5007848	72.9043
RBG-18-0186-1	1266566	1266566	202.373	102.528	4989094	120.782
RBG-18-0241-1	740862	740862	218.973	64.8915	4667721	41.979
RBG-18-0242-1	697061	697061	226.42	63.1314	5028600	36.4879
RBG-18-0320-1	1024409	1024409	227.945	93.4036	4614607	91.3107
RBG-18-0378-1	2901753	2901753	133.806	155.309	4582245	89.3933
RBG-18-0415-1	2848924	2848924	132.765	151.295	4859257	136.145
RBK-16-0078-3	7968699	5312466	141.384	375.549	4863916	124.714
RBK-17-0014-2	10096284	6730856	139.126	468.219	4942228	252.006
RBK-17-0221-2	990879	990879	122.977	48.7421	4784603	29.1305
RBK-17-0230-1	5223218	5223218	137.248	286.75	4900016	181.833
RBK-17-0305-1	2721355	2721355	116.02	126.293	4973037	146.776
RBK-17-0344-2	8292183	5528122	138.253	382.14	4736007	172.723
RBK-17-0375-1	6975255	4650170	141.134	328.149	4592416	412.169
RBK-17-0394-1	4673868	4673868	128.158	239.597	4718456	166.55
RBK-17-0398-1	6617739	4411826	139.069	306.774	4757033	389.82
RBK-17-0399-1	2932327	2932327	120.422	141.247	4767369	69.7765
RBK-17-0497-1	2037109	2037109	127.006	103.49	5137927	86.7979
RBK-18-0141-1	1311886	1311886	140.86	73.9169	4993686	16.3216
RBK-18-0208-1	2006249	2006249	142.219	114.131	4608273	31.2509
RBK-18-0264-1	1123694	1123694	141.364	63.54	4619310	13.7656
RBK-18-0386-2	2824120	2824120	129.459	146.243	4726567	115.257
RBL-16-0059-1	597915	597915	138.054	33.0178	4868806	80.6328
RBL-16-0092-1	5484618	3656412	133.137	243.402	4816531	78.7557
RBL-17-0079-1	1586468	1586468	143.625	91.1426	4798001	310.078
RBL-17-0146-1	1310543	1310543	146.928	77.0222	4897715	43.1748
RBL-17-0167-1	10498027	10498027	141.983	596.217	4631957	424.77
RBL-17-0180-1	3213473	3213473	128.412	165.059	4652108	102.359
RBL-17-0228-1	1217695	1217695	121.692	59.2735	5267165	10.7817
RBL-17-0250-3	955235	955235	121.137	46.2857	4768075	9.37349
RBL-17-0286-1	1890899	1890899	124.163	93.9119	4789426	21.2483
RBL-17-0298-1	6457193	6457193	136.803	353.345	4815605	318.938
RBL-17-0312-2	2327627	2327627	131.606	122.532	4711440	202.433
RBL-17-0354-2	1904469	1904469	129.918	98.9699	4934081	68.856
RBL-17-0362-1	5908106	5908106	144.599	341.722	4859261	231.106
RBL-17-0384-1	1364561	1364561	144.515	78.8798	4804296	42.3603
RBL-17-0419-2	3047729	3047729	135.809	165.564	4618106	112.083
RBL-17-0437-1	8071829	8071829	110.448	356.607	5028438	334.295
RBL-18-0029-2	750002	750002	145.214	43.5643	4803040	8.53805
RBL-18-0072-1	2735605	2735605	128.925	141.075	4380394	71.1276
RBL-18-0073-1	678946	678946	124.613	33.8422	4562328	13.2602
RBL-18-0073-2	1664033	1664033	145.591	96.9073	4904821	92.925
RBL-18-0082-1	1318943	1318943	145.314	76.6644	4842824	16.227
RBL-18-0105-1	2268408	2268408	136.02	123.42	4986542	282.09
RBL-18-0138-1	2542625	2542625	132.487	134.746	4687076	171.58
RBL-18-0307-1	2264921	2264921	121.991	110.52	4767305	48.2702
RBL-18-0346-1	1978433	1978433	137.897	109.128	5018715	186.7
RBL-18-0456-2	2144858	2144858	138.835	119.113	4936585	739.883
RBL-18-0461-2	1512986	1512986	138.058	83.5519	4744721	48.2706
RPB-16-0320-1	9505605	6337070	106.725	338.162	5153491	78.8794
RPB-17-0076-1	3129191	3129191	98.236	122.96	4818113	72.6333
RPB-17-0198-1	5872499	5872499	96.7933	227.367	4708799	107.047
RPB-17-0209-1	4995730	4995730	88.6833	177.215	4516276	92.0162
RPB-17-0356-1	9589151	9589151	99.9782	383.482	4908296	237.898
RPB-17-0441-1	4069379	4069379	108.093	175.949	4615622	85.3201
RPB-17-0516-2	5214236	5214236	97.8184	204.019	4767828	253.884
RPB-17-0516-3	4398053	4398053	113.584	199.819	4857491	537.555
RPB-18-0042-1	3049031	3049031	116.369	141.925	4612626	45.8609
RPB-18-0140-1	1488940	1488940	134.126	79.8822	4700718	48.4516
RPB-18-0151-1	2100716	2100716	137.311	115.381	4983169	98.0803
RPB-18-0431-1	1579661	1579661	132.025	83.4219	4771618	119.394
RPB-18-0431-2	2318115	2318115	127.221	117.965	4925859	59.6346
RPB-18-0433-1	2397091	2397091	134.366	128.835	4858329	428.195
RPB-18-0456-1	2399855	2399855	129.712	124.516	4848579	180.374
RPB-18-0460-1	2300352	2300352	130.81	120.364	4775965	72.8683
RPB-18-0510-1	1905665	1905665	137.162	104.554	4820831	38.7657
RPF-17-0168-1	3469836	3469836	83.9501	116.517	4825179	198.099
RPF-17-0222-2	2295409	2295409	101.332	93.0394	4752183	31.1111
RPF-17-0249-1	3096117	3096117	101.853	126.14	5178282	44.3508
RPF-17-0260-1	3989898	3989898	99.148	158.236	5030414	267.664
RPF-18-0104-1	1372994	1372994	136.549	74.9924	4770997	35.036
RPF-18-0143-1	1867373	1867373	135.084	100.901	5242425	45.4533
RPF-18-0225-1	3430396	3430396	135.601	186.066	4768031	2034.55
RPF-18-0247-1	1952504	1952504	134.07	104.709	4693080	74.043
RPF-18-0265-1	4990265	4990265	131.238	261.965	4540653	188.365
RPF-18-0297-1	1650573	1650573	136.998	90.4501	4764664	58.3644
RPG-17-0504-1	3151210	3151210	137.996	173.942	4838903	99.5588
RPG-17-0577-1	1808869	1808869	118.466	85.7158	4759150	46.6722
RPG-17-0579-1	1403445	1403445	114.803	64.4479	4779610	30.4084
RPK-16-0191-2	2738226	2738226	136.026	148.988	5061687	254.656
RPK-16-0522-1	4397796	2931864	105.749	155.021	4783504	33.4555
RPK-17-0322-2	3630832	3630832	108.085	156.975	4752205	89.0676
RPK-17-0325-1	3470664	3470664	90.1928	125.212	4802779	63.1948
RPK-17-0332-1	2110040	2110040	81.5242	68.8077	4883650	52.0753
RPK-17-0437-2	1953150	1953150	84.1018	65.7054	4629832	30.6095
RPK-18-0072-1	1905380	1905380	128.208	97.714	5029865	51.6817
RPK-18-0156-1	1071439	1071439	238.547	102.235	4749689	63.2214
RPK-18-0157-1	1976923	1976923	126.664	100.162	4979256	42.8551
RPK-18-0173-1	2025499	2025499	117.436	95.1466	4923074	62.2632
RPK-18-0360-1	2364054	2364054	136.2	128.794	4982783	105.282
RPK-18-0479-1	2380894	2380894	137.95	131.378	4622019	68.4517
RPK-18-0503-1	1845612	1845612	136.022	100.418	4729875	113.514
RPK-18-0503-2	2011569	2011569	134.268	108.036	4650615	68.4291
RPK-18-0524-1	3767661	3767661	132.439	199.594	4716323	108.113
RPL-16-0036-1	6005127	4003418	105.097	210.374	5013753	41.5277
RPL-16-0286-1	2599631	2599631	134.234	139.584	4799732	263.917
RPL-17-0177-1	4276191	4276191	97.8533	167.376	5049557	81.7316
RPL-18-0075-1	3063397	3063397	117.915	144.488	4784567	64.0554
RPL-18-0150-1	1827484	1827484	132.151	96.6015	5035547	49.5353
RPL-18-0211-3	2490109	2490109	138.7	138.151	4528068	74.5521
RPL-18-0213-1	1946830	1946830	118.692	92.4293	5041345	40.7248
RPT-16-0054-1	1945158	1945158	126.551	98.4647	4726329	101.01
RPT-16-0254-2	2809968	3738382	141.286	185.038	4605276	88.8302
RPT-17-0081-1	2367259	2367259	131.892	124.889	4834091	119.048
RPT-17-0298-1	1896924	1896924	136.028	103.214	4835577	271.766
RPT-18-0057-1	819799	819799	137.315	45.0283	4950823	24.7894
Survcare220	584262	584262	272.151	63.603	4866067	31.6075

## Sheet: (d) Nanopore
Strain	Total_number_of_reads	Length_reads_Nanopore	Corrected_nanopore_reads	Corrected_nanopore_reads_(%)
And8437	306,042	4 / 4126 / 83,863	208,665	68.1818
ESBL3012	359,843	2 / 6543.8 / 104,048	236,422	65.7014
RBF-18-0224-1	27,040	3 / 4121.5 / 77,169	17,982	66.5015
RBG-18-0107-1	380,608	7 / 7020.2 / 102,198	275,497	72.3834
RBK-18-0141-1	423,913	7 / 5537.4 / 118,534	298,641	70.4487
RBL-17-0437-1	308,195	2 / 6650.1 / 107,712	219,940	71.3639
RBL-18-0082-1	433,238	1 / 5528.1 / 124,258	313,819	72.4357
RPB-16-0320-1	470,486	18 / 5399.1 / 113,954	316,278	67.2237
RPF-17-0249-1	353,867	12 / 6011 / 110,263	257,108	72.6567
RPF-17-0260-1	576,894	2 / 5089.1 / 115,938	408,221	70.7619
