# Supplementary material for: Resolving colistin resistance and heteroresistance in Enterobacter species
Source: Research Square preprint supplement (doi:10.21203/rs.3.rs-1894580/v1), 2022-08-03
Supplement: Supplementary file 7 [file e8fa70d89d5cf7e57ba84077.xlsx]

## Sheet: (a)phoP
isolate_name	Species	Lineage	MIC (µg/ml)	PAP	38	123	128	130	142	143	146	149	166	205	208	223	224
RPK-18-0157-1	E. cloacae	#N/A	NA	high	.	.	.	.	.	.	N	.	.	.	Q	.	.
RBL-17-0228-1	E. cloacae	#N/A	NA	NA	.	.	.	.	.	.	N	.	.	.	.	.	.	D	38	N	D38N
ESBL2036	E. cloacae	#N/A	NA	high	.	.	.	.	.	.	N	.	.	.	.	.	.	L	123	H	L123H
RBF-17-0514-1	E. cloacae	#N/A	NA	high	.	.	.	.	.	.	N	.	.	.	.	.	.	I	128	F	I128F
RBF-18-0271-1	E. ludwigii	#N/A	NA	NA	.	.	.	I	.	.	N	.	S	E	Q	I	.	L	130	I	L130I
RPL-18-0213-1	E. ludwigii	#N/A	NA	NA	.	.	.	I	.	.	N	.	S	E	Q	I	.	F	142	L	F142L
RPB-16-0320-1	E. ludwigii	#N/A	NA	NA	.	.	.	I	.	.	N	.	S	E	Q	I	.	S	143	A	S143A
And4961	E. ludwigii	#N/A	NA	NA	.	.	.	I	.	.	N	.	S	E	Q	I	.	D	146	N	D146N
RBF-18-0335-1	E. ludwigii	#N/A	NA	NA	.	.	.	I	.	.	N	.	S	E	Q	I	.	I	149	V	I149V
RBG-18-0242-1	E. ludwigii	#N/A	NA	NA	.	.	.	I	.	.	N	.	S	E	Q	I	.	N	166	S	N166S
RPF-17-0222-2	E. ludwigii	#N/A	NA	NA	.	.	.	I	.	.	N	.	S	E	L	I	.	Q	205	E	Q205E
RPG-17-0577-1	E. ludwigii	#N/A	NA	NA	.	.	.	I	.	.	N	.	S	E	L	I	.	H	208	Q	H208Q
RPK-17-0322-2	E. ludwigii	#N/A	NA	NA	.	.	.	I	.	.	N	.	S	E	L	I	.	L	223	I	L223I
RPB-18-0460-1	E. ludwigii	#N/A	NA	NA	.	.	.	I	.	.	N	.	S	E	Q	I	.	R	224	S	R224S
RPG-17-0504-1	E. ludwigii	#N/A	NA	NA	.	.	.	I	.	.	N	.	S	E	Q	I	.
RBF-17-0584-3	E. ludwigii	#N/A	NA	NA	.	.	.	I	.	.	N	.	S	E	Q	I	.
RPL-16-0036-1	E. ludwigii	#N/A	NA	NA	.	.	.	I	.	.	N	.	S	E	Q	I	.
F-8789	E. ludwigii	#N/A	8-64.	high	.	.	.	I	.	.	N	.	S	E	Q	I	.
RBL-18-0307-1	E. ludwigii	#N/A	NA	high	.	.	.	I	.	.	N	.	S	E	Q	I	.
BK6227	E. ludwigii	#N/A	NA	NA	.	.	.	I	.	.	N	.	S	E	Q	I	.
RBF-18-0023-1	E. ludwigii	#N/A	NA	NA	.	.	.	I	.	.	N	.	S	E	Q	I	.
RBL-18-0461-2	E. ludwigii	#N/A	NA	NA	.	.	.	I	.	.	N	.	S	E	Q	I	.
RBF-18-0074-1	E. ludwigii	#N/A	NA	high	.	.	.	I	.	.	N	.	S	E	Q	I	.
RPF-18-0247-1	E. ludwigii	#N/A	NA	NA	.	.	.	I	.	.	N	.	S	E	Q	I	.
RPK-18-0156-1	E. ludwigii	#N/A	NA	NA	.	.	.	I	.	.	N	.	S	E	Q	I	.
RBG-17-0309-2	E. ludwigii	#N/A	NA	NA	.	.	.	I	.	.	N	.	S	E	Q	I	.
RBL-18-0029-2	E. ludwigii	#N/A	NA	NA	.	.	.	I	.	.	N	.	S	E	Q	I	.
RPK-18-0479-1	E. cancerogenus	#N/A	64-128	high	.	.	.	.	.	.	.	.	.	.	Q	.	.
RBL-17-0354-2	E. tabaci	#N/A	32-64	high	.	H	.	.	.	.	N	V	.	.	Q	.	.
RBF-17-0338-1	E. kobei	#N/A	NA	NA	.	.	.	I	L	.	N	.	S	.	Q	.	.
RPK-18-0072-1	E. kobei	#N/A	NA	NA	.	.	.	I	L	.	N	.	S	.	Q	.	.
RPB-18-0042-1	E. kobei	#N/A	NA	high	.	.	.	I	L	.	N	.	S	.	Q	.	.
RPL-18-0150-1	E. kobei	#N/A	NA	high	.	.	.	I	L	.	N	.	S	.	Q	.	.
RBL-18-0456-2	E. kobei	#N/A	NA	NA	.	.	.	I	L	.	N	.	S	.	Q	.	.
BK6664	E. kobei	#N/A	NA	high	.	.	.	I	L	.	N	.	S	.	Q	.	.
RBG-16-0046-1	E. kobei	#N/A	NA	NA	.	.	.	I	L	.	N	.	S	.	Q	.	.
RBL-16-0092-1	E. kobei	#N/A	NA	NA	.	.	.	I	L	.	N	.	S	.	Q	.	.
RBL-17-0362-1	E. kobei	#N/A	NA	NA	.	.	.	I	L	.	N	.	S	.	Q	.	.
RBG-17-0246-1	E. bugandensis	#N/A	64-128	high	.	.	.	I	L	.	.	.	S	.	Q	.	.
BK7261	E. bugandensis	#N/A	NA	high	.	.	.	I	L	.	.	.	S	.	Q	.	.
F-1367	E. bugandensis	#N/A	NA	NA	.	.	.	I	L	.	.	.	S	.	Q	.	.
RPF-18-0143-1	E. bugandensis	#N/A	NA	NA	.	.	.	I	L	.	.	.	S	.	Q	.	.
Survcare220	E. bugandensis	#N/A	NA	high	.	.	.	I	L	.	.	.	S	.	Q	.	.
RBK-18-0141-1	E. chengduensis	#N/A	64-128	high	.	.	.	I	L	.	.	.	.	.	Q	.	.
F-147	E. vonholyi	#N/A	2-4.(phoQ*)	-ve	.	.	.	I	L	A	.	.	.	.	Q	.	.
BK5433	E. asburiae	#N/A	>128	high	.	.	.	I	L	A	.	.	.	.	Q	.	.
RBG-18-0415-1	E. asburiae	#N/A	>128	high	.	.	.	I	L	A	.	.	.	.	Q	.	.
RPT-18-0057-1	E. roggenkampii	#N/A	NA	NA	.	.	.	I	L	.	.	.	.	.	Q	.	.
RPK-16-0191-2	E. roggenkampii	#N/A	NA	NA	.	.	.	I	L	.	.	.	S	.	Q	.	.
RPB-17-0516-2	E. roggenkampii	#N/A	64->128	high	.	.	.	I	L	.	.	.	S	.	Q	.	.
RPG-17-0579-1	E. roggenkampii	#N/A	NA	NA	.	.	.	I	L	.	.	.	S	.	Q	.	.
RPT-17-0298-1	E. roggenkampii	#N/A	NA	NA	.	.	.	I	L	.	.	.	S	.	Q	.	.
RBK-17-0344-2	E. roggenkampii	#N/A	NA	NA	.	.	.	I	L	.	.	.	S	.	Q	.	.
RPK-18-0503-2	E. roggenkampii	#N/A	NA	high	.	.	.	I	L	.	.	.	S	.	Q	.	.
RPK-18-0173-1	E. roggenkampii	#N/A	NA	NA	.	.	.	I	L	.	.	.	S	.	Q	.	.
RPK-18-0524-1	E. roggenkampii	#N/A	NA	high	.	.	.	I	L	.	.	.	S	.	Q	.	.
F00728	E. quasihormaechei	#N/A	4-6.(lack arn)	-ve	.	.	.	.	.	.	.	.	.	.	.	.	.
RPF-18-0297-1	E. xiangfangensis	II	NA	NA	.	.	.	.	.	.	.	.	.	.	.	.	.
RBF-18-0266-1	E. xiangfangensis	II	NA	NA	.	.	.	.	.	.	.	.	.	.	.	.	.
RBB-17-0902-1	E. xiangfangensis	II	NA	NA	.	.	.	.	.	.	.	.	.	.	.	.	.
RBL-17-0146-1	E. xiangfangensis	II	4	-ve	.	.	.	.	.	.	.	.	.	.	.	.	.
RPL-18-0075-1	E. xiangfangensis	II	NA	NA	.	.	.	.	.	.	.	.	.	.	.	.	.
RBG-17-0085-1	E. xiangfangensis	II	NA	NA	.	.	.	.	.	.	.	.	.	.	.	.	.
RBG-17-0358-1	E. xiangfangensis	II	NA	NA	.	.	.	.	.	.	.	.	.	.	.	.	.
RBG-17-0389-1	E. xiangfangensis	II	NA	NA	.	.	.	.	.	.	.	.	.	.	.	.	.
RBL-18-0105-1	E. xiangfangensis	II	NA	NA	.	.	.	.	.	.	.	.	.	.	.	.	.
RBF-18-0378-1	E. xiangfangensis	II	NA	NA	.	.	.	.	.	.	.	.	.	.	.	.	.
RPT-17-0081-1	E. xiangfangensis	II	NA	NA	.	.	.	.	.	.	.	.	.	.	.	.	.
RBL-18-0073-2	E. xiangfangensis	II	NA	NA	.	.	.	.	.	.	.	.	.	.	.	.	.
RPB-18-0456-1	E. xiangfangensis	II	NA	NA	.	.	.	.	.	.	.	.	.	.	.	.	.
RBB-16-0116-1	E. xiangfangensis	II	NA	NA	.	.	.	.	.	.	.	.	.	.	.	.	.
RBK-16-0078-3	E. xiangfangensis	II	NA	NA	.	.	.	.	.	.	.	.	.	.	.	.	.
BK6046	E. xiangfangensis	II	NA	NA	.	.	.	.	.	.	.	.	.	.	.	.	.
RBL-18-0082-1	E. xiangfangensis	II	2-4	-ve	.	.	.	.	.	.	.	.	.	.	.	.	.
RPT-16-0254-2	E. xiangfangensis	II	2-4.	-ve	.	.	.	.	.	.	.	.	.	.	.	.	.
RBL-17-0167-1	E. xiangfangensis	II	NA	NA	.	.	.	.	.	.	.	.	.	.	.	.	.
RPK-18-0503-1	E. xiangfangensis	II	NA	NA	.	.	.	.	.	.	.	.	.	.	.	.	.
RPF-18-0104-1	E. xiangfangensis	II	NA	NA	.	.	.	.	.	.	.	.	.	.	.	.	.
RBF-17-0511-1	E. xiangfangensis	II	NA	NA	.	.	.	.	.	.	.	.	.	.	.	.	.
RBF-18-0052-1	E. xiangfangensis	II	NA	NA	.	.	.	.	.	.	.	.	.	.	.	.	.
RBL-18-0072-1	E. xiangfangensis	II	NA	NA	.	.	.	.	.	.	.	.	.	.	.	.	.
RPB-17-0441-1	E. xiangfangensis	II	NA	NA	.	.	.	.	.	.	.	.	.	.	.	.	.
RPL-18-0211-3	E. xiangfangensis	II	NA	NA	.	.	.	.	.	.	.	.	.	.	.	.	.
RBF-17-0256-1	E. xiangfangensis	III	NA	NA	.	.	.	.	.	.	.	.	.	.	.	.	.
And1463	E. xiangfangensis	III	NA	NA	.	.	.	.	.	.	.	.	.	.	.	.	.
RBF-18-0224-1	E. xiangfangensis	III	2-6	-ve	.	.	.	.	.	.	.	.	.	.	.	.	.
RBG-18-0378-1	E. xiangfangensis	III	2-4.	-ve	.	.	.	.	.	.	.	.	.	.	.	.	.
And6885	E. xiangfangensis	III	NA	NA	.	.	.	.	.	.	.	.	.	.	.	.	.
RPB-18-0433-1	E. xiangfangensis	III	NA	NA	.	.	.	.	.	.	.	.	.	.	.	.	.
And2481	E. xiangfangensis	III	2-4	-ve	.	.	.	.	.	.	.	.	.	.	.	.	.
RBK-18-0208-1	E. xiangfangensis	III	NA	NA	.	.	.	.	.	.	.	.	.	.	.	.	.
And2854	E. xiangfangensis	III	NA	NA	.	.	.	.	.	.	.	.	.	.	.	.	.
RBL-17-0419-2	E. xiangfangensis	III	NA	NA	.	.	.	.	.	.	.	.	.	.	.	.	.
RPF-18-0265-1	E. xiangfangensis	III	NA	NA	.	.	.	.	.	.	.	.	.	.	.	.	.
RBF-16-0042-1	E. xiangfangensis	IV	4-8.	-ve	.	.	.	.	.	.	.	.	.	.	.	.	.
RBG-18-0241-1	E. xiangfangensis	IV	6	-ve	.	.	.	.	.	.	.	.	.	.	.	.	.
RBK-17-0398-1	E. xiangfangensis	IV	2-6.	-ve	.	.	.	.	.	.	.	.	.	.	.	.	.
RBL-17-0312-2	E. xiangfangensis	IV	2-6.	-ve	.	.	.	.	.	.	.	.	.	.	.	.	.
RPB-18-0431-1	E. xiangfangensis	IV	2-6.	-ve	.	.	.	.	.	.	.	.	.	.	.	.	.
RBL-17-0298-1	E. xiangfangensis	IV	1-16.	-ve	.	.	.	.	.	.	.	.	.	.	.	.	.
RBL-18-0138-1	E. xiangfangensis	IV	2-4.	-ve	.	.	.	.	.	.	.	.	.	.	.	.	.
RBK-17-0305-1	E. xiangfangensis	I	4-8	low	.	.	.	.	.	.	.	.	.	.	.	.	.
RBK-17-0497-1	E. xiangfangensis	I	4-8	low	N	.	.	.	.	.	.	.	.	.	.	.	.
RBG-17-0272-1	E. xiangfangensis	I	4	low	.	.	.	.	.	.	.	.	.	.	.	.	.
RBG-17-0018-1	E. xiangfangensis	I	2-4	low	.	.	.	.	.	.	.	.	.	.	.	.	.
RPK-17-0332-1	E. xiangfangensis	I	2-4	low	.	.	.	.	.	.	.	.	.	.	.	.	.
BK6928	E. xiangfangensis	I	NA	NA	.	.	.	.	.	.	.	.	.	.	.	.	.
And8437	E. xiangfangensis	I	1-4	low	.	.	F	.	.	.	.	.	.	.	.	.	.
RPB-17-0076-1	E. xiangfangensis	I	4-16	low	.	.	F	.	.	.	.	.	.	.	.	.	.
BK4767	E. xiangfangensis	I	NA	NA	.	.	.	.	.	.	.	.	.	.	.	.	.
RBG-18-0186-1	E. xiangfangensis	I	2-4	low	.	.	.	.	.	.	.	.	.	.	.	.	.
RBL-16-0059-1	E. xiangfangensis	I	4-64.	low	.	.	.	.	.	.	.	.	.	.	.	.	.
RBL-17-0079-1	E. xiangfangensis	I	4-8	low	.	.	.	.	.	.	.	.	.	.	.	.	.
RPL-16-0286-1	E. xiangfangensis	I	NA	NA	.	.	.	.	.	.	.	.	.	.	.	.	.
RPF-17-0168-1	E. xiangfangensis	I	1-6	low	.	.	.	.	.	.	.	.	.	.	.	.	.
RBK-17-0394-1	E. xiangfangensis	I	6-16	low	D	L	I	L	F	S	D	I	N	Q	H	L	R	reference amino acids
RPK-16-0522-1	E. xiangfangensis	I	4-16	low	.	.	.	.	.	.	.	.	.	.	.	.	.
RBF-18-0302-3	E. xiangfangensis	I	2-64.	low	.	.	.	.	.	.	.	.	.	.	.	.	.
RBF-18-0318-1	E. xiangfangensis	I	6-16	low	.	.	.	.	.	.	.	.	.	.	.	.	.
RPB-17-0356-1	E. xiangfangensis	I	4-64.	low	.	.	.	.	.	.	.	.	.	.	.	.	.
RPB-18-0151-1	E. xiangfangensis	I	NA	NA	.	.	.	.	.	.	.	.	.	.	.	.	.
RPK-18-0360-1	E. xiangfangensis	I	NA	NA	.	.	.	.	.	.	.	.	.	.	.	.	.
RBK-17-0230-1	E. xiangfangensis	I	4-16	low	.	.	.	.	.	.	.	.	.	.	.	.	.
RPK-17-0325-1	E. xiangfangensis	I	4-16	low	.	.	.	.	.	.	.	.	.	.	.	.	.
RBK-17-0399-1	E. xiangfangensis	I	4-8	low	.	.	.	.	.	.	.	.	.	.	.	.	.
RBL-17-0286-1	E. xiangfangensis	I	4-8	low	.	.	.	.	.	.	.	.	.	.	.	.	.
RPB-18-0431-2	E. xiangfangensis	I	NA	NA	.	.	.	.	.	.	.	.	.	.	.	.	.
RBK-18-0386-2	E. xiangfangensis	I	NA	NA	.	.	.	.	.	.	.	.	.	.	.	.	.
RBG-17-0257-1	E. xiangfangensis	I	4-32	low	.	.	.	.	.	.	.	.	.	.	.	.	.
RPB-18-0510-1	E. xiangfangensis	I	NA	NA	.	.	.	.	.	.	.	.	.	.	.	.	.
RBL-17-0250-3	E. xiangfangensis	I	2-4.(phoQ*)	-ve	.	.	.	.	.	.	.	.	.	.	.	.	.
RBL-17-0180-1	E. xiangfangensis	I	4-8	low	.	.	.	.	.	.	.	.	.	.	.	.	.
RPL-17-0177-1	E. xiangfangensis	I	8-16	low	.	.	.	.	.	.	.	.	.	.	.	.	.
RPB-17-0516-3	E. xiangfangensis	I	6-16	low	.	.	.	.	.	.	.	.	.	.	.	.	.
ESBL3012	E. xiangfangensis	I	16-64	low	.	.	.	.	.	.	.	.	.	.	.	.	.
RBL-18-0346-1	E. xiangfangensis	I	64-128(mgrB*)	NA	.	.	.	.	.	.	.	.	.	.	.	.	.
RBL-17-0437-1	E. xiangfangensis	I	2-8	low	.	.	.	.	.	.	.	.	.	.	.	.	.
RPF-17-0249-1	E. xiangfangensis	I	4-8	low	.	.	.	.	.	.	.	.	.	.	.	.	.
RPB-18-0140-1	E. xiangfangensis	I	NA	NA	.	.	.	.	.	.	.	.	.	.	.	.	.
RPF-17-0260-1	E. xiangfangensis	I	4-6	low	.	.	.	.	.	.	.	.	.	.	.	.	.
RBK-17-0221-2	E. xiangfangensis	I	4-8	low	.	.	.	.	.	.	.	.	.	.	.	.	.
RPT-16-0054-1	E. xiangfangensis	I	NA	NA	.	.	.	.	.	.	.	.	.	.	.	.	.
RBG-18-0107-1	E. xiangfangensis	I	4-16	low	.	.	.	.	.	.	.	.	.	.	.	.	.
ESBL3620	E. xiangfangensis	I	4-6	low	.	.	.	.	.	.	.	.	.	.	.	.	.
RBG-17-0345-1	E. xiangfangensis	I	4-16	low	.	.	.	.	.	.	.	.	.	.	.	.	.
RBK-17-0014-2	E. xiangfangensis	I	2-4	low	.	.	.	.	.	.	.	.	.	.	.	.	.
F-232	E. xiangfangensis	I	6-16	low	.	.	.	.	.	.	.	.	.	.	.	.	S
RBL-17-0384-1	E. xiangfangensis	I	2-8	low	.	.	.	.	.	.	.	.	.	.	.	.	.
F03651	E. xiangfangensis	I	6-16	low	.	.	.	.	.	.	.	.	.	.	.	.	.
RBF-16-0075-1	E. xiangfangensis	I	4-32	low	.	.	.	.	.	.	.	.	.	.	.	.	.
RBL-18-0073-1	E. xiangfangensis	I	4-16	low	.	.	.	.	.	.	.	.	.	.	.	.	.
RPK-17-0437-2	E. xiangfangensis	I	NA	NA	.	.	.	.	.	.	.	.	.	.	.	.	.
BK4615	E. xiangfangensis	I	2-16	low	.	.	.	.	.	.	.	.	.	.	.	.	.
F-190	E. xiangfangensis	I	4-16	low	.	.	.	.	.	.	.	.	.	.	.	.	.
RPB-17-0209-1	E. xiangfangensis	I	NA	NA	.	.	.	.	.	.	.	.	.	.	.	.	.
ESBL5467	E. xiangfangensis	I	6-16	low	.	.	.	.	.	.	.	.	.	.	.	.	.
RBF-18-0058-1	E. xiangfangensis	I	4-16	low	.	.	.	.	.	.	.	.	.	.	.	.	.
RBF-18-0729-1	E. xiangfangensis	I	NA	NA	.	.	.	.	.	.	.	.	.	.	.	.	.
RPB-17-0198-1	E. xiangfangensis	I	2-16	low	.	.	.	.	.	.	.	.	.	.	.	.	.
RBG-18-0320-1	E. xiangfangensis	I	4-16	low	.	.	.	.	.	.	.	.	.	.	.	.	.
RBK-17-0375-1	E. xiangfangensis	I	4-16	low	.	.	.	.	.	.	.	.	.	.	.	.	.
RBF-18-0288-1	E. xiangfangensis	I	4-16	low	.	.	.	.	.	.	.	.	.	.	.	.	.
RPF-18-0225-1	E. xiangfangensis	I	NA	NA	.	.	.	.	.	.	.	.	.	.	.	.	.
RBB-18-0493-1	E. xiangfangensis	I	1-8	low	.	.	.	.	.	.	.	.	.	.	.	.	.
RBK-18-0264-1	E. xiangfangensis	I	4-16	low	.	.	.	.	.	.	.	.	.	.	.	.	.
Key:
.	same amino acid as in E. xiangfangensis RBK-17-0394
#N/A	Not applicable
phoQ*	truncated phoQ

## Sheet: (b)phoQ
										TM	sesnor domain
isolate_name	Species	Lineage	MIC (µg/ml)	PAP	2	3	5	8	9	34	64	67	69	71	73	77	79	85	87	90	101	102	106	108	112	115	122	128	129	131	133	134	135	137	138	139	141	148	149	150	151	152	163	168	169	178	183	190	193
RPK-18-0157-1	E. cloacae	#N/A	NA	high	.	R	.	F	.	.	R	.	K	.	.	.	.	M	.	N	.	.	V	.	.	.	.	T	.	T	.	.	E	.	S	.	K	.	D	.	A	E	.	T	.	V	.	R	G
RBL-17-0228-1	E. cloacae	#N/A	NA	NA	-	-	-	-	-	.	.	.	Q	S	.	.	.	.	.	N	.	.	V	S	.	.	.	T	.	.	.	.	E	.	S	.	K	.	D	.	A	E	.	P	D	V	.	R	G
ESBL2036	E. cloacae	#N/A	NA	high	-	-	-	-	-	.	.	.	Q	S	.	.	.	.	.	N	.	.	V	S	.	.	.	T	.	.	.	.	E	.	S	.	K	.	D	.	A	E	.	P	D	V	.	R	G
RBF-17-0514-1	E. cloacae	#N/A	NA	high	-	-	-	-	-	.	.	.	Q	S	.	.	.	.	.	N	.	.	V	S	.	.	.	T	.	.	.	.	E	.	S	.	K	.	D	.	A	E	.	P	D	V	.	R	G
RBF-18-0271-1	E. ludwigii	#N/A	NA	NA	.	.	.	.	.	.	.	.	T	.	.	.	.	.	.	N	.	I	V	S	.	.	L	T	.	.	.	.	E	.	S	.	Q	.	D	.	A	E	.	M	.	V	.	.	.
RPL-18-0213-1	E. ludwigii	#N/A	NA	NA	.	.	.	.	.	.	.	.	T	.	.	.	.	.	.	N	.	I	V	S	.	.	L	T	.	.	.	.	E	.	S	.	Q	.	D	.	A	E	.	M	.	V	.	.	.
RPB-16-0320-1	E. ludwigii	#N/A	NA	NA	.	.	.	.	.	.	.	.	T	.	.	.	.	.	.	N	.	I	V	S	.	.	L	T	.	.	.	.	E	.	S	.	Q	.	D	.	A	E	.	M	.	V	.	.	.
And4961	E. ludwigii	#N/A	NA	NA	.	.	.	.	.	.	.	.	T	.	.	.	.	.	.	N	.	I	V	S	.	.	L	T	.	.	.	.	E	.	S	.	Q	.	D	.	A	E	.	M	.	V	.	.	.
RBF-18-0335-1	E. ludwigii	#N/A	NA	NA	.	.	.	.	.	.	.	.	T	.	.	.	.	.	.	N	.	I	V	S	.	.	L	T	.	.	.	.	E	.	S	.	Q	.	D	.	A	E	.	M	.	V	.	.	.
RBG-18-0242-1	E. ludwigii	#N/A	NA	NA	R	.	.	.	.	.	.	.	T	.	.	.	.	.	.	N	.	I	V	S	.	.	L	T	.	.	.	.	E	.	S	.	Q	.	D	.	A	E	.	M	.	V	.	.	.
RPF-17-0222-2	E. ludwigii	#N/A	NA	NA	.	.	.	.	.	.	.	.	T	.	.	.	.	.	.	N	.	I	V	S	.	.	L	T	.	.	.	.	E	.	S	.	Q	.	D	.	A	E	.	M	.	V	.	.	.
RPG-17-0577-1	E. ludwigii	#N/A	NA	NA	.	.	.	.	.	.	.	.	T	.	.	.	.	.	.	N	.	I	V	S	.	.	L	T	.	.	.	.	E	.	S	.	Q	.	D	.	A	E	.	M	.	V	.	.	.
RPK-17-0322-2	E. ludwigii	#N/A	NA	NA	.	.	.	.	.	.	.	.	T	.	.	.	.	.	.	N	.	I	V	S	.	.	L	T	.	.	.	.	E	.	S	.	Q	.	D	.	A	E	.	M	.	V	.	.	.
RPB-18-0460-1	E. ludwigii	#N/A	NA	NA	R	.	.	.	.	.	.	.	T	.	.	.	.	.	.	N	.	I	V	S	.	.	L	T	.	.	.	.	E	.	S	.	Q	.	D	.	A	E	.	M	.	V	.	.	.
RPG-17-0504-1	E. ludwigii	#N/A	NA	NA	.	.	.	.	.	.	.	.	T	.	.	.	.	.	.	N	.	I	V	S	.	.	L	T	.	.	.	.	E	.	S	.	Q	.	D	.	A	E	.	M	.	V	.	.	.
RBF-17-0584-3	E. ludwigii	#N/A	NA	NA	R	.	.	.	.	.	.	.	T	.	.	.	.	.	.	N	.	I	V	S	.	.	L	T	.	.	.	.	E	.	S	.	Q	.	D	.	A	E	.	M	.	V	.	.	.
RPL-16-0036-1	E. ludwigii	#N/A	NA	NA	.	.	.	.	.	.	.	.	T	.	.	.	.	.	.	N	.	I	V	S	.	.	L	T	.	.	.	.	E	.	S	.	Q	.	D	.	A	E	.	M	.	V	.	.	.
F-8789	E. ludwigii	#N/A	8-64.	high	.	.	.	.	.	.	.	.	T	.	.	.	.	.	.	N	.	I	V	S	.	.	L	T	.	.	.	.	E	.	S	.	Q	.	D	.	A	E	.	M	.	V	.	.	.
RBL-18-0307-1	E. ludwigii	#N/A	NA	high	.	.	.	.	.	.	.	.	T	.	.	.	.	.	.	N	.	I	V	S	.	.	L	T	.	.	.	.	E	.	S	.	Q	.	D	.	A	E	.	M	.	V	.	.	.
BK6227	E. ludwigii	#N/A	NA	NA	.	.	.	.	.	.	.	.	T	.	.	.	.	.	.	N	.	I	V	S	.	.	L	T	.	.	.	.	E	.	S	.	Q	.	D	.	A	E	.	M	.	V	.	.	.
RBF-18-0023-1	E. ludwigii	#N/A	NA	NA	.	.	.	.	.	.	.	.	T	.	.	.	.	.	.	N	.	I	V	S	.	.	L	T	.	.	.	.	E	.	S	.	Q	.	D	.	A	E	.	M	.	V	.	.	.
RBL-18-0461-2	E. ludwigii	#N/A	NA	NA	.	.	.	.	.	.	.	.	T	.	.	.	.	.	.	N	.	I	V	S	.	.	L	T	.	.	.	.	E	.	S	.	Q	.	D	.	A	E	.	M	.	V	.	.	.
RBF-18-0074-1	E. ludwigii	#N/A	NA	high	.	.	.	.	.	.	.	.	T	.	.	.	.	.	.	N	.	I	V	S	.	.	L	T	.	.	.	.	E	.	S	.	Q	.	D	.	A	E	.	M	.	V	.	.	.
RPF-18-0247-1	E. ludwigii	#N/A	NA	NA	.	.	.	.	.	.	.	.	T	.	.	.	.	.	.	N	.	I	V	S	.	.	L	T	.	.	.	.	E	.	S	.	Q	.	D	.	A	E	.	M	.	V	.	.	.
RPK-18-0156-1	E. ludwigii	#N/A	NA	NA	.	.	.	.	.	.	.	.	T	.	.	.	.	.	.	N	.	I	V	S	.	.	L	T	.	.	.	.	E	.	S	.	Q	.	D	.	A	E	.	M	.	V	.	.	.
RBG-17-0309-2	E. ludwigii	#N/A	NA	NA	.	.	.	.	.	.	.	.	T	.	.	.	.	.	.	N	.	I	V	S	.	.	L	T	.	.	.	.	E	.	S	.	Q	.	D	.	A	E	.	M	.	V	.	.	.
RBL-18-0029-2	E. ludwigii	#N/A	NA	NA	.	.	.	.	.	.	.	.	T	.	.	.	.	.	.	N	.	I	V	S	.	.	L	T	.	.	.	.	E	.	S	.	Q	.	D	.	A	E	.	M	.	V	.	.	.
RPK-18-0479-1	E. cancerogenus	#N/A	64-128	high	.	.	V	L	F	.	.	D	H	.	D	H	.	.	M	N	.	.	.	.	.	.	.	A	S	V	.	.	.	.	S	.	Q	E	D	.	.	.	.	M	.	.	.	K	S
RBL-17-0354-2	E. tabaci	#N/A	32-64	high	.	.	S	F	.	L	.	D	H	.	D	H	.	.	.	.	.	.	.	.	.	R	.	.	.	A	.	H	.	.	.	.	Q	E	D	.	.	.	.	M	.	.	.	.	S
RBF-17-0338-1	E. kobei	#N/A	NA	NA	R	Q	.	.	.	.	.	.	.	S	.	.	.	.	.	N	.	I	V	S	.	.	.	T	.	.	I	.	E	.	S	M	Q	E	D	.	A	E	I	M	.	.	.	R	S
RPK-18-0072-1	E. kobei	#N/A	NA	NA	R	Q	.	.	.	.	.	.	.	S	.	.	.	.	.	N	.	I	V	S	.	.	.	T	.	.	I	.	E	.	S	M	Q	E	D	.	A	E	I	M	.	.	.	R	S
RPB-18-0042-1	E. kobei	#N/A	NA	high	R	Q	.	.	.	.	.	.	.	S	.	.	.	.	.	N	.	I	V	S	.	.	.	T	.	.	I	.	E	.	S	M	Q	E	D	.	A	E	I	M	.	.	.	R	S
RPL-18-0150-1	E. kobei	#N/A	NA	high	R	Q	.	.	.	.	.	.	.	S	.	.	.	.	.	N	.	I	V	S	.	.	.	T	.	.	I	.	E	.	S	M	Q	E	D	.	A	E	I	M	.	.	.	R	S
RBL-18-0456-2	E. kobei	#N/A	NA	NA	R	Q	.	.	.	.	.	.	.	S	.	.	.	.	.	N	.	I	V	S	.	.	.	T	.	.	I	.	E	.	S	M	Q	E	D	.	A	E	I	M	.	.	.	R	S
BK6664	E. kobei	#N/A	NA	high	R	Q	.	.	.	.	.	.	.	S	.	.	.	.	.	N	.	I	V	S	.	.	.	T	.	.	I	.	E	.	S	M	Q	E	D	.	A	E	I	M	.	.	.	R	S
RBG-16-0046-1	E. kobei	#N/A	NA	NA	R	Q	.	.	.	.	.	.	.	S	.	.	.	.	.	N	.	I	V	S	.	.	.	T	.	.	I	.	E	.	S	M	Q	E	D	.	A	E	I	M	.	.	.	R	S
RBL-16-0092-1	E. kobei	#N/A	NA	NA	R	Q	.	.	.	.	.	.	.	S	.	.	.	.	.	N	.	I	V	S	.	.	.	T	.	.	I	.	E	.	S	M	Q	E	D	.	A	E	I	M	.	.	.	R	S
RBL-17-0362-1	E. kobei	#N/A	NA	NA	R	Q	.	.	.	.	.	.	.	S	.	.	.	.	.	N	.	I	V	S	.	.	.	T	.	.	I	.	E	.	S	M	Q	E	D	.	A	E	I	M	.	.	.	R	S
RBG-17-0246-1	E. bugandensis	#N/A	64-128	high	R	R	.	.	.	L	T	D	H	.	.	.	D	.	.	N	.	I	A	S	.	.	.	T	.	T	I	.	E	.	S	M	Q	.	D	.	A	E	I	M	.	.	.	K	G
BK7261	E. bugandensis	#N/A	NA	high	.	R	.	.	.	L	T	D	H	.	.	.	D	.	.	N	.	I	A	S	.	.	.	T	.	T	I	.	E	.	S	M	Q	.	D	.	A	E	I	M	.	.	.	K	G
F-1367	E. bugandensis	#N/A	NA	NA	R	R	.	.	.	L	T	D	H	.	.	.	D	.	.	N	.	I	A	S	.	.	.	T	.	T	I	.	E	.	S	M	Q	.	D	.	A	E	I	M	.	.	.	K	G
RPF-18-0143-1	E. bugandensis	#N/A	NA	NA	R	R	.	.	.	L	T	D	H	.	.	.	D	.	.	N	.	I	A	S	.	.	.	T	.	T	I	.	E	.	S	M	Q	.	D	.	A	E	I	M	.	.	.	K	G
Survcare220	E. bugandensis	#N/A	NA	high	R	R	.	.	.	L	T	D	H	.	.	.	D	.	.	N	.	I	A	S	.	.	.	T	.	T	I	.	E	.	S	M	Q	.	D	.	A	E	I	M	.	.	.	K	G
RBK-18-0141-1	E. chengduensis	#N/A	64-128	high	R	R	.	.	.	.	.	.	.	.	.	.	.	.	.	.	.	I	V	S	.	.	.	T	.	.	I	.	E	.	S	.	Q	.	D	.	A	E	.	.	.	.	I	.	S
F-147	E. vonholyi	#N/A	2-4.(phoQ*)	-ve	R	R	.	.	.	.	.	.	Q	.	.	.	.	.	.	.	.	I	V	S	D	R	.	T	.	.	I	.	E	.	S	.	Q	.	D	N	A	E	.	.	.	.	.	.	S
BK5433	E. asburiae	#N/A	>128	high	R	.	.	.	.	.	.	.	.	.	.	.	.	.	.	N	.	I	V	S	D	.	.	T	.	.	I	.	E	.	S	.	Q	.	D	N	A	E	.	.	.	.	.	.	S
RBG-18-0415-1	E. asburiae	#N/A	>128	high	R	.	.	.	.	.	.	.	.	.	.	.	.	.	.	N	.	I	V	S	.	.	.	T	.	.	I	H	E	.	S	.	Q	.	D	N	A	E	.	.	.	.	.	.	S
RPT-18-0057-1	E. roggenkampii	#N/A	NA	NA	-	-	-	-	.	.	.	D	K	.	.	.	.	.	.	.	.	I	V	S	D	.	.	T	.	.	I	.	E	.	S	.	Q	.	D	.	A	E	.	.	.	.	.	.	S
RPK-16-0191-2	E. roggenkampii	#N/A	NA	NA	R	R	.	L	.	.	.	D	.	.	.	.	.	.	.	N	.	I	V	S	.	.	.	T	.	.	I	.	E	.	S	.	Q	.	D	.	A	E	.	.	.	.	.	.	S
RPB-17-0516-2	E. roggenkampii	#N/A	64->128	high	R	R	.	L	.	.	.	D	.	.	.	.	.	.	.	N	.	I	V	S	.	.	.	T	.	.	I	.	E	.	S	.	Q	.	D	.	A	E	.	.	.	.	.	.	S
RPG-17-0579-1	E. roggenkampii	#N/A	NA	NA	R	R	.	L	.	.	.	D	.	.	.	.	.	.	.	N	.	I	V	S	.	.	.	T	.	.	I	.	E	.	S	.	Q	.	D	.	A	E	.	.	.	.	.	.	S
RPT-17-0298-1	E. roggenkampii	#N/A	NA	NA	R	R	.	L	.	.	.	D	.	.	.	.	.	.	M	N	.	I	V	S	.	.	.	T	.	.	I	.	E	.	S	.	Q	.	D	.	A	E	.	.	.	.	.	.	S
RBK-17-0344-2	E. roggenkampii	#N/A	NA	NA	R	R	.	L	.	.	.	D	.	.	.	.	.	.	.	N	.	I	V	S	.	.	.	T	.	.	I	.	E	.	S	.	Q	.	D	.	A	E	.	.	.	.	.	.	S
RPK-18-0503-2	E. roggenkampii	#N/A	NA	high	R	R	.	L	.	.	.	D	.	.	.	.	.	.	.	N	.	I	V	S	.	.	.	T	.	.	I	.	E	.	S	.	Q	.	D	.	A	E	.	.	.	.	.	.	S
RPK-18-0173-1	E. roggenkampii	#N/A	NA	NA	R	R	.	L	.	.	.	D	.	.	.	.	.	.	.	N	.	I	V	S	K	.	.	T	.	.	I	.	E	.	S	.	Q	.	D	.	A	E	.	.	.	.	.	.	S
RPK-18-0524-1	E. roggenkampii	#N/A	NA	high	R	R	.	L	.	.	.	D	.	.	.	.	.	.	.	N	.	I	V	S	.	.	.	T	.	.	I	.	E	.	S	.	Q	.	D	.	A	E	.	.	.	.	.	.	S
F00728	E. quasihormaechei	#N/A	4-6.(lack arn)	-ve	.	.	.	.	.	.	.	.	Q	.	.	.	.	.	.	.	.	.	.	.	.	.	.	.	.	I	.	.	.	.	.	.	N	.	.	.	.	.	.	.	.	.	.	.	.
RPF-18-0297-1	E. xiangfangensis	II	NA	NA	.	.	.	.	.	.	.	.	Q	.	.	.	.	.	.	.	.	.	.	.	.	.	.	.	.	I	.	.	.	.	.	.	N	.	.	.	.	.	.	.	.	.	.	.	.
RBF-18-0266-1	E. xiangfangensis	II	NA	NA	.	.	.	.	.	.	.	.	Q	.	.	.	.	.	.	.	.	.	.	.	.	.	.	.	.	I	.	.	.	.	.	.	N	.	.	.	.	.	.	.	.	.	.	.	.
RBB-17-0902-1	E. xiangfangensis	II	NA	NA	.	.	.	.	.	.	.	.	Q	.	.	.	.	.	.	.	.	.	.	.	.	.	.	.	.	I	.	.	.	.	.	.	N	.	.	.	.	.	.	.	.	.	.	.	.
RBL-17-0146-1	E. xiangfangensis	II	4	-ve	.	.	.	.	.	.	.	.	Q	.	.	.	.	.	.	.	.	.	.	.	.	.	.	.	.	I	.	.	.	.	.	.	N	.	.	.	.	.	.	.	.	.	.	.	.
RPL-18-0075-1	E. xiangfangensis	II	NA	NA	.	.	.	.	.	.	.	.	Q	.	.	.	.	.	.	.	.	.	.	.	.	.	.	.	.	I	.	.	.	.	.	.	N	.	.	.	.	.	.	.	.	.	.	.	.
RBG-17-0085-1	E. xiangfangensis	II	NA	NA	.	.	.	.	.	.	.	.	Q	.	.	.	.	.	.	.	.	.	.	.	.	.	.	.	.	I	.	.	.	.	.	.	N	.	.	.	.	.	.	.	.	.	.	.	.
RBG-17-0358-1	E. xiangfangensis	II	NA	NA	.	.	.	.	.	.	.	.	Q	.	.	.	.	.	.	.	.	.	.	.	.	.	.	.	.	I	.	.	.	.	.	.	N	.	.	.	.	.	.	.	.	.	.	.	.
RBG-17-0389-1	E. xiangfangensis	II	NA	NA	.	.	.	.	.	.	.	.	Q	.	.	.	.	.	.	.	.	.	.	.	.	.	.	.	.	I	.	.	.	.	.	.	N	.	.	.	.	.	.	.	.	.	.	.	.
RBL-18-0105-1	E. xiangfangensis	II	NA	NA	.	.	.	.	.	.	.	.	Q	.	.	.	.	.	.	.	.	.	.	.	.	.	.	.	.	I	.	.	.	.	.	.	N	.	.	.	.	.	.	.	.	.	.	.	.
RBF-18-0378-1	E. xiangfangensis	II	NA	NA	.	.	.	.	.	.	.	.	Q	.	.	.	.	.	.	.	.	.	.	.	.	.	.	.	.	I	.	.	.	.	.	.	N	.	.	.	.	.	.	.	.	.	.	.	.
RPT-17-0081-1	E. xiangfangensis	II	NA	NA	.	.	.	.	.	.	.	.	Q	.	.	.	.	.	.	.	.	.	.	.	.	.	.	.	.	I	.	.	.	.	.	.	N	.	.	.	.	.	.	.	.	.	.	.	.
RBL-18-0073-2	E. xiangfangensis	II	NA	NA	.	.	.	.	.	.	.	.	Q	.	.	.	.	.	.	.	.	.	.	.	.	.	.	.	.	I	.	.	.	.	.	.	N	.	.	.	.	.	.	.	.	.	.	.	.
RPB-18-0456-1	E. xiangfangensis	II	NA	NA	.	.	.	.	.	.	.	.	Q	.	.	.	.	.	.	.	.	.	.	.	.	.	.	.	.	I	.	.	.	.	.	.	N	.	.	.	.	.	.	.	.	.	.	.	.
RBB-16-0116-1	E. xiangfangensis	II	NA	NA	.	.	.	.	.	.	.	.	Q	.	.	.	.	.	.	.	.	.	.	.	.	.	.	.	.	F	.	.	.	L	.	.	N	.	.	.	.	.	.	.	.	.	.	.	.
RBK-16-0078-3	E. xiangfangensis	II	NA	NA	.	.	.	.	.	.	.	.	Q	.	.	.	.	.	.	.	.	.	.	.	.	.	.	.	.	F	.	.	.	L	.	.	N	.	.	.	.	.	.	.	.	.	.	.	.
BK6046	E. xiangfangensis	II	NA	NA	.	.	.	.	.	.	.	.	Q	.	.	.	.	.	.	.	.	.	.	.	.	.	.	.	.	I	.	.	.	.	.	.	N	.	.	.	.	.	.	.	.	.	.	.	.
RBL-18-0082-1	E. xiangfangensis	II	2-4	-ve	.	.	.	.	.	.	.	.	Q	.	.	.	.	.	.	.	.	.	.	.	.	.	.	.	.	I	.	.	.	.	.	.	N	.	.	.	.	.	.	.	.	.	.	.	.
RPT-16-0254-2	E. xiangfangensis	II	2-4.	-ve	.	.	.	.	.	.	.	.	Q	.	.	.	.	.	.	.	.	.	.	.	.	.	.	.	.	I	.	.	.	.	.	.	N	.	.	.	.	.	.	.	.	.	.	.	.
RBL-17-0167-1	E. xiangfangensis	II	NA	NA	.	.	.	.	.	.	.	.	Q	.	.	.	.	.	.	.	.	.	.	.	.	.	.	.	.	I	.	.	.	.	.	.	N	.	.	.	.	.	.	.	.	.	.	.	.
RPK-18-0503-1	E. xiangfangensis	II	NA	NA	.	.	.	.	.	.	.	.	Q	.	.	.	.	.	.	.	.	.	.	.	.	.	.	.	.	I	.	.	.	.	.	.	N	.	.	.	.	.	.	.	.	.	.	.	.
RPF-18-0104-1	E. xiangfangensis	II	NA	NA	.	.	.	.	.	.	.	.	Q	.	.	.	.	.	.	.	.	.	.	.	.	.	.	.	.	I	.	.	.	.	.	.	N	.	.	.	.	.	.	.	.	.	.	.	.
RBF-17-0511-1	E. xiangfangensis	II	NA	NA	.	.	.	.	.	.	.	.	Q	.	.	.	.	.	.	.	.	.	.	.	.	.	.	.	.	I	.	.	.	.	.	.	N	.	.	.	.	.	.	.	.	.	.	.	.
RBF-18-0052-1	E. xiangfangensis	II	NA	NA	.	.	.	.	.	.	.	.	Q	.	.	.	.	.	.	.	.	.	.	.	.	.	.	.	.	I	.	.	.	.	.	.	N	.	.	.	.	.	.	.	.	.	.	.	.
RBL-18-0072-1	E. xiangfangensis	II	NA	NA	.	.	.	.	.	.	.	.	Q	.	.	.	.	.	.	.	.	.	.	.	.	.	.	.	.	I	.	.	.	.	.	.	N	.	.	.	.	.	.	.	.	.	.	.	.
RPB-17-0441-1	E. xiangfangensis	II	NA	NA	.	.	.	.	.	.	.	.	Q	.	.	.	.	.	.	.	.	.	.	.	.	.	.	.	.	I	.	.	.	.	.	.	N	.	.	.	.	.	.	.	.	.	.	.	.
RPL-18-0211-3	E. xiangfangensis	II	NA	NA	.	.	.	.	.	.	.	.	Q	.	.	.	.	.	.	.	.	.	.	.	.	.	.	.	.	I	.	.	.	.	.	.	N	.	.	.	.	.	.	.	.	.	.	.	.
RBF-17-0256-1	E. xiangfangensis	III	NA	NA	.	.	.	.	.	.	.	.	.	.	.	.	.	.	.	.	.	.	.	.	.	.	.	.	.	.	.	.	.	.	.	.	.	.	.	.	.	.	.	.	.	.	.	.	.
And1463	E. xiangfangensis	III	NA	NA	.	.	.	.	.	.	.	.	.	.	.	.	.	.	.	.	.	.	.	.	.	.	.	.	.	.	.	.	.	.	.	.	.	.	.	.	.	.	.	.	.	.	.	.	.
RBF-18-0224-1	E. xiangfangensis	III	2-6	-ve	.	.	.	.	.	.	.	.	.	.	.	.	.	.	.	.	.	.	.	.	.	.	.	.	.	.	.	.	.	.	.	.	.	.	.	.	.	.	.	.	.	.	.	.	.
RBG-18-0378-1	E. xiangfangensis	III	2-4.	-ve	.	.	.	.	.	.	.	.	.	.	.	.	.	.	.	.	.	.	.	.	.	.	.	.	.	.	.	.	.	.	.	.	.	.	.	.	.	.	.	.	.	.	.	.	.
And6885	E. xiangfangensis	III	NA	NA	.	.	.	.	.	.	.	.	.	.	.	.	.	.	.	.	.	.	.	.	.	.	.	.	.	.	.	.	.	.	.	.	.	.	.	.	.	.	.	.	.	.	.	.	.
RPB-18-0433-1	E. xiangfangensis	III	NA	NA	.	.	.	.	.	.	.	.	.	.	.	.	.	.	.	.	.	.	.	.	.	.	.	.	.	.	.	.	.	.	.	.	.	.	.	.	.	.	.	.	.	.	.	.	.
And2481	E. xiangfangensis	III	2-4	-ve	.	.	.	.	.	.	.	.	.	.	.	.	.	.	.	.	.	.	.	.	.	.	.	.	.	.	.	.	.	.	.	.	.	.	.	.	.	.	.	.	.	.	.	.	.
RBK-18-0208-1	E. xiangfangensis	III	NA	NA	.	.	.	.	.	.	.	.	.	.	.	.	.	.	.	.	.	.	.	.	.	.	.	.	.	.	.	.	.	.	.	.	.	.	.	.	.	.	.	.	.	.	.	.	.
And2854	E. xiangfangensis	III	NA	NA	.	.	.	.	.	.	.	.	.	.	.	.	.	.	.	.	.	.	.	.	.	.	.	.	.	.	.	.	.	.	.	.	.	.	.	.	.	.	.	.	.	.	.	.	.
RBL-17-0419-2	E. xiangfangensis	III	NA	NA	.	.	.	.	.	.	.	.	.	.	.	.	.	.	.	.	.	.	.	.	.	.	.	.	.	.	.	.	.	.	.	.	.	.	.	.	.	.	.	.	.	.	.	.	.
RPF-18-0265-1	E. xiangfangensis	III	NA	NA	.	.	.	.	.	.	.	.	.	.	.	.	.	.	.	.	.	.	.	.	.	.	.	.	.	.	.	.	.	.	.	.	.	.	.	.	.	.	.	.	.	.	.	.	.
RBF-16-0042-1	E. xiangfangensis	IV	4-8.	-ve	.	.	.	.	.	.	.	.	.	.	.	.	.	.	.	.	.	.	.	.	.	.	.	.	.	.	.	.	.	.	.	.	.	.	.	.	.	.	.	.	.	.	.	.	.
RBG-18-0241-1	E. xiangfangensis	IV	6	-ve	.	.	.	.	.	.	.	.	.	.	.	.	.	.	.	.	.	.	.	.	.	.	.	.	.	.	.	.	.	.	.	.	.	.	.	.	.	.	.	.	.	.	.	.	.
RBK-17-0398-1	E. xiangfangensis	IV	2-6.	-ve	.	.	.	.	.	.	.	.	.	.	.	.	.	.	.	.	N	.	.	.	.	.	.	.	.	.	.	.	.	.	.	.	.	.	.	.	.	.	.	.	.	.	.	.	.
RBL-17-0312-2	E. xiangfangensis	IV	2-6.	-ve	.	.	.	.	.	.	.	.	.	.	.	.	.	.	.	.	N	.	.	.	.	.	.	.	.	.	.	.	.	.	.	.	.	.	.	.	.	.	.	.	.	.	.	.	.
RPB-18-0431-1	E. xiangfangensis	IV	2-6.	-ve	.	.	.	.	.	.	.	.	.	.	.	.	.	.	.	.	N	.	.	.	.	.	.	.	.	.	.	.	.	.	.	.	.	.	.	.	.	.	.	.	.	.	.	.	.
RBL-17-0298-1	E. xiangfangensis	IV	1-16.	-ve	.	.	.	.	.	.	.	.	.	.	.	.	.	.	.	.	N	.	.	.	.	.	.	.	.	.	.	.	.	.	.	.	.	.	.	.	.	.	.	.	.	.	.	.	.
RBL-18-0138-1	E. xiangfangensis	IV	2-4.	-ve	.	.	.	.	.	.	.	.	.	.	.	.	.	.	.	.	N	.	.	.	.	.	.	.	.	.	.	.	.	.	.	.	.	.	.	.	.	.	.	.	.	.	.	.	.
RBK-17-0305-1	E. xiangfangensis	I	4-8	low	.	.	.	.	.	.	.	.	.	.	.	.	.	.	.	.	.	.	.	.	.	.	.	.	.	.	.	.	.	.	.	.	.	.	.	.	.	.	.	.	.	.	.	.	.
RBK-17-0497-1	E. xiangfangensis	I	4-8	low	.	.	.	.	.	.	.	.	.	.	.	.	.	.	.	.	.	.	.	.	.	.	.	.	.	.	.	.	.	.	.	.	.	.	.	.	.	.	.	.	.	.	.	.	.
RBG-17-0272-1	E. xiangfangensis	I	4	low	.	.	.	.	.	.	.	.	.	.	.	.	.	.	.	.	.	.	.	.	.	.	.	.	.	.	.	.	.	.	.	.	.	.	.	.	.	.	.	.	.	.	.	.	.
RBG-17-0018-1	E. xiangfangensis	I	2-4	low	.	.	.	.	.	.	.	.	.	.	.	.	.	.	.	.	.	.	.	.	.	.	.	.	.	.	.	.	.	.	.	.	.	.	.	.	.	.	.	.	.	.	.	.	.
RPK-17-0332-1	E. xiangfangensis	I	2-4	low	.	.	.	.	.	.	.	.	.	.	.	.	.	.	.	.	.	.	.	.	.	.	.	.	.	.	.	.	.	.	.	.	.	.	.	.	.	.	.	.	.	.	.	.	.
BK6928	E. xiangfangensis	I	NA	NA	.	.	.	.	.	.	.	.	.	.	.	.	.	.	.	.	.	.	.	.	.	.	.	.	.	.	.	.	.	.	.	.	.	.	.	.	.	.	.	.	.	.	.	.	.
And8437	E. xiangfangensis	I	1-4	low	.	.	.	.	.	.	.	.	.	.	.	.	.	.	.	.	.	.	.	.	.	.	.	.	.	.	.	.	.	.	.	.	.	.	.	.	.	.	.	.	.	.	.	.	.
RPB-17-0076-1	E. xiangfangensis	I	4-16	low	.	.	.	.	.	.	.	.	.	.	.	.	.	.	.	.	.	.	.	.	.	.	.	.	.	.	.	.	.	.	.	.	.	.	.	.	.	.	.	.	.	.	.	.	.
BK4767	E. xiangfangensis	I	NA	NA	.	.	.	.	.	.	.	.	.	.	.	.	.	.	.	.	.	.	.	.	.	.	.	.	.	.	.	.	.	.	.	.	.	.	.	.	.	.	.	.	.	.	.	.	.
RBG-18-0186-1	E. xiangfangensis	I	2-4	low	.	.	.	.	.	.	.	.	.	.	.	.	.	.	.	.	.	.	.	.	.	.	.	.	.	.	.	.	.	.	.	.	.	.	.	.	.	.	.	.	.	.	.	.	.
RBL-16-0059-1	E. xiangfangensis	I	4-64.	low	.	.	.	.	.	.	.	.	.	.	.	.	.	.	.	.	.	.	.	.	.	.	.	.	.	.	.	.	.	.	.	.	.	.	.	.	.	.	.	.	.	.	.	.	.
RBL-17-0079-1	E. xiangfangensis	I	4-8	low	.	.	.	.	.	.	.	.	.	.	.	.	.	.	.	.	.	.	.	.	.	.	.	.	.	.	.	.	.	.	.	.	.	.	.	.	.	.	.	.	.	.	.	.	.
RPL-16-0286-1	E. xiangfangensis	I	NA	NA	.	.	.	.	.	.	.	.	.	.	.	.	.	.	.	.	.	.	.	.	.	.	.	.	.	.	.	.	.	.	.	.	.	.	.	.	.	.	.	.	.	.	.	.	.
RPF-17-0168-1	E. xiangfangensis	I	1-6	low	.	.	.	.	.	.	.	.	.	.	.	.	.	.	.	.	.	.	.	.	.	.	.	.	.	.	.	.	.	.	.	.	.	.	.	.	.	.	.	.	.	.	.	.	.
RBK-17-0394-1	E. xiangfangensis	I	6-16	low	K	G	L	I	L	M	K	N	R	T	E	N	N	L	L	D	D	V	K	R	E	K	I	S	T	S	L	R	D	R	A	L	I	A	E	D	D	D	L	L	N	I	V	M	N
RPK-16-0522-1	E. xiangfangensis	I	4-16	low	.	.	.	.	.	.	.	.	.	.	.	.	.	.	.	.	.	.	.	.	.	.	.	.	.	.	.	.	.	.	.	.	.	.	.	.	.	.	.	.	.	.	.	.	.
RBF-18-0302-3	E. xiangfangensis	I	2-64.	low	.	.	.	.	.	.	.	.	.	.	.	.	.	.	.	.	.	.	.	.	.	.	.	.	.	.	.	.	.	.	.	.	.	.	.	.	.	.	.	.	.	.	.	.	.
RBF-18-0318-1	E. xiangfangensis	I	6-16	low	.	.	.	.	.	.	.	.	.	.	.	.	.	.	.	.	.	.	.	.	.	.	.	.	.	.	.	.	.	.	.	.	.	.	.	.	.	.	.	.	.	.	.	.	.
RPB-17-0356-1	E. xiangfangensis	I	4-64.	low	.	.	.	.	.	.	.	.	.	.	.	.	.	.	.	.	.	.	.	.	.	.	.	.	.	.	.	.	.	.	.	.	.	.	.	.	.	.	.	.	.	.	.	.	.
RPB-18-0151-1	E. xiangfangensis	I	NA	NA	.	.	.	.	.	.	.	.	.	.	.	.	.	.	.	.	.	.	.	.	.	.	.	.	.	.	.	.	.	.	.	.	.	.	.	.	.	.	.	.	.	.	.	.	.
RPK-18-0360-1	E. xiangfangensis	I	NA	NA	.	.	.	.	.	.	.	.	.	.	.	.	.	.	.	.	.	.	.	.	.	.	.	.	.	.	.	.	.	.	.	.	.	.	.	.	.	.	.	.	.	.	.	.	.
RBK-17-0230-1	E. xiangfangensis	I	4-16	low	.	.	.	.	.	.	.	.	.	.	.	.	.	.	.	.	.	.	.	.	.	.	.	.	.	.	.	.	.	.	.	.	.	.	.	.	.	.	.	.	.	.	.	.	.
RPK-17-0325-1	E. xiangfangensis	I	4-16	low	.	.	.	.	.	.	.	.	.	.	.	.	.	.	.	.	.	.	.	.	.	.	.	.	.	.	.	.	.	.	.	.	.	.	.	.	.	.	.	.	.	.	.	.	.
RBK-17-0399-1	E. xiangfangensis	I	4-8	low	.	.	.	.	.	.	.	.	.	.	.	.	.	.	.	.	.	.	.	.	.	.	.	.	.	.	.	.	.	.	.	.	.	.	.	.	.	.	.	.	.	.	.	.	.
RBL-17-0286-1	E. xiangfangensis	I	4-8	low	.	.	.	.	.	.	.	.	.	.	.	.	.	.	.	.	.	.	.	.	.	.	.	.	.	.	.	.	.	.	.	.	.	.	.	.	.	.	.	.	.	.	.	.	.
RPB-18-0431-2	E. xiangfangensis	I	NA	NA	.	.	.	.	.	.	.	.	.	.	.	.	.	.	.	.	.	.	.	.	.	.	.	.	.	.	.	.	.	.	.	.	.	.	.	.	.	.	.	.	.	.	.	.	.
RBK-18-0386-2	E. xiangfangensis	I	NA	NA	.	.	.	.	.	.	.	.	.	.	.	.	.	.	.	.	.	.	.	.	.	.	.	.	.	.	.	.	.	.	.	.	.	.	.	.	.	.	.	.	.	.	.	.	.
RBG-17-0257-1	E. xiangfangensis	I	4-32	low	.	.	.	.	.	.	.	.	.	.	.	.	.	.	.	.	.	.	.	.	.	.	.	.	.	.	.	.	.	.	.	.	.	.	.	.	.	.	.	.	.	.	.	.	.
RPB-18-0510-1	E. xiangfangensis	I	NA	NA	.	.	.	.	.	.	.	.	.	.	.	.	.	.	.	.	.	.	.	.	.	.	.	.	.	.	.	.	.	.	.	.	.	.	.	.	.	.	.	.	.	.	.	.	.
RBL-17-0250-3	E. xiangfangensis	I	2-4.(phoQ*)	-ve	.	.	.	.	.	.	.	.	.	.	.	.	.	.	.	.	.	.	.	.	.	.	.	.	.	.	.	.	.	.	.	.	.	.	.	.	.	.	.	.	.	.	.	.	.
RBL-17-0180-1	E. xiangfangensis	I	4-8	low	.	.	.	.	.	.	.	.	.	.	.	.	.	.	.	.	.	.	.	.	.	.	.	.	.	.	.	.	.	.	.	.	.	.	.	.	.	.	.	.	.	.	.	.	.
RPL-17-0177-1	E. xiangfangensis	I	8-16	low	.	.	.	.	.	.	.	.	.	.	.	.	.	.	.	.	.	.	.	.	.	.	.	.	.	.	.	.	.	.	.	.	.	.	.	.	.	.	.	.	.	.	.	.	.
RPB-17-0516-3	E. xiangfangensis	I	6-16	low	.	.	.	.	.	.	.	.	.	.	.	.	.	.	.	.	.	.	.	.	.	.	.	.	.	.	.	.	.	.	.	.	.	.	.	.	.	.	.	.	.	.	.	.	.
ESBL3012	E. xiangfangensis	I	16-64	low	.	.	.	.	.	.	.	.	.	.	.	.	.	.	.	.	.	.	.	.	.	.	.	.	.	.	.	.	.	.	.	.	.	.	.	.	.	.	.	.	.	.	.	.	.
RBL-18-0346-1	E. xiangfangensis	I	64-128(mgrB*)	NA	.	.	.	.	.	.	.	.	.	.	.	.	.	.	.	.	.	.	.	.	.	.	.	.	.	.	.	.	.	.	.	.	.	.	.	.	.	.	.	.	.	.	.	.	.
RBL-17-0437-1	E. xiangfangensis	I	2-8	low	.	.	.	.	.	.	.	.	.	.	.	.	.	.	.	.	.	.	.	.	.	.	.	.	.	.	.	.	.	.	.	.	.	.	.	.	.	.	.	.	.	.	.	.	.
RPF-17-0249-1	E. xiangfangensis	I	4-8	low	.	.	.	.	.	.	.	.	.	.	.	.	.	.	.	.	.	.	.	.	.	.	.	.	.	.	.	.	.	.	.	.	.	.	.	.	.	.	.	.	.	.	.	.	.
RPB-18-0140-1	E. xiangfangensis	I	NA	NA	.	.	.	.	.	.	.	.	.	.	.	.	.	.	.	.	.	.	.	.	.	.	.	.	.	.	.	.	.	.	.	.	.	.	.	.	.	.	.	.	.	.	.	.	.
RPF-17-0260-1	E. xiangfangensis	I	4-6	low	.	.	.	.	.	.	.	.	.	.	.	.	.	.	.	.	.	.	.	.	.	.	.	.	.	.	.	.	.	.	.	.	.	.	.	.	.	.	.	.	.	.	.	.	.
RBK-17-0221-2	E. xiangfangensis	I	4-8	low	.	.	.	.	.	.	.	.	.	.	.	.	.	.	.	.	.	.	.	.	.	.	.	.	.	.	.	.	.	.	.	.	.	.	.	.	.	.	.	.	.	.	.	.	.
RPT-16-0054-1	E. xiangfangensis	I	NA	NA	.	.	.	.	.	.	.	.	.	.	.	.	.	.	.	.	.	.	.	.	.	.	.	.	.	.	.	.	.	.	.	.	.	.	.	.	.	.	.	.	.	.	.	.	.
RBG-18-0107-1	E. xiangfangensis	I	4-16	low	.	.	.	.	.	.	.	.	.	.	.	.	.	.	.	.	.	.	.	.	.	.	.	.	.	.	.	.	.	.	.	.	.	.	.	.	.	.	.	.	.	.	.	.	.
ESBL3620	E. xiangfangensis	I	4-6	low	.	.	.	.	.	.	.	.	.	.	.	.	.	.	.	.	.	.	.	.	.	.	.	.	.	.	.	.	.	.	.	.	.	.	.	.	.	.	.	.	.	.	.	.	.
RBG-17-0345-1	E. xiangfangensis	I	4-16	low	.	.	.	.	.	.	.	.	.	.	.	.	.	.	.	.	.	.	.	.	.	.	.	.	.	.	.	.	.	.	.	.	.	.	.	.	.	.	.	.	.	.	.	.	.
RBK-17-0014-2	E. xiangfangensis	I	2-4	low	.	.	.	.	.	.	.	.	.	.	.	.	.	.	.	.	.	.	.	.	.	.	.	.	.	.	.	.	.	.	.	.	.	.	.	.	.	.	.	.	.	.	.	.	.
F-232	E. xiangfangensis	I	6-16	low	.	.	.	.	.	.	.	.	.	.	.	.	.	.	.	.	.	.	.	.	.	.	.	.	.	.	.	.	.	.	.	.	.	.	.	.	.	.	.	.	.	.	.	.	.
RBL-17-0384-1	E. xiangfangensis	I	2-8	low	.	.	.	.	.	.	.	.	.	.	.	.	.	.	.	.	.	.	.	.	.	.	.	.	.	.	.	.	.	.	.	.	.	.	.	.	.	.	.	.	.	.	.	.	.
F03651	E. xiangfangensis	I	6-16	low	.	.	.	.	.	.	.	.	.	.	.	.	.	.	.	.	.	.	.	.	.	.	.	.	.	.	.	.	.	.	.	.	.	.	.	.	.	.	.	.	.	.	.	.	.
RBF-16-0075-1	E. xiangfangensis	I	4-32	low	.	.	.	.	.	.	.	.	.	.	.	.	.	.	.	.	.	.	.	.	.	.	.	.	.	.	.	.	.	.	.	.	.	.	.	.	.	.	.	.	.	.	.	.	.
RBL-18-0073-1	E. xiangfangensis	I	4-16	low	.	.	.	.	.	.	.	.	.	.	.	.	.	.	.	.	.	.	.	.	.	.	.	.	.	.	.	.	.	.	.	.	.	.	.	.	.	.	.	.	.	.	.	.	.
RPK-17-0437-2	E. xiangfangensis	I	NA	NA	.	.	.	.	.	.	.	.	.	.	.	.	.	.	.	.	.	.	.	.	.	.	.	.	.	.	.	.	.	.	.	.	.	.	.	.	.	.	.	.	.	.	.	.	.
BK4615	E. xiangfangensis	I	2-16	low	.	.	.	.	.	.	.	.	.	.	.	.	.	.	.	.	.	.	.	.	.	.	.	.	.	.	.	.	.	.	.	.	.	.	.	.	.	.	.	.	.	.	.	.	.
F-190	E. xiangfangensis	I	4-16	low	.	.	.	.	.	.	.	.	.	.	.	.	.	.	.	.	.	.	.	.	.	.	.	.	.	.	.	.	.	.	.	.	.	.	.	.	.	.	.	.	.	.	.	.	.
RPB-17-0209-1	E. xiangfangensis	I	NA	NA	.	.	.	.	.	.	.	.	.	.	.	.	.	.	.	.	.	.	.	.	.	.	.	.	.	.	.	.	.	.	.	.	.	.	.	.	.	.	.	.	.	.	.	.	.
ESBL5467	E. xiangfangensis	I	6-16	low	.	.	.	.	.	.	.	.	.	.	.	.	.	.	.	.	.	.	.	.	.	.	.	.	.	.	.	.	.	.	.	.	.	.	.	.	.	.	.	.	.	.	.	.	.
RBF-18-0058-1	E. xiangfangensis	I	4-16	low	.	.	.	.	.	.	.	.	.	.	.	.	.	.	.	.	.	.	.	.	.	.	.	.	.	.	.	.	.	.	.	.	.	.	.	.	.	.	.	.	.	.	.	.	.
RBF-18-0729-1	E. xiangfangensis	I	NA	NA	.	.	.	.	.	.	.	.	.	.	.	.	.	.	.	.	.	.	.	.	.	.	.	.	.	.	.	.	.	.	.	.	.	.	.	.	.	.	.	.	.	.	.	.	.
RPB-17-0198-1	E. xiangfangensis	I	2-16	low	.	.	.	.	.	.	.	.	.	.	.	.	.	.	.	.	.	.	.	.	.	.	.	.	.	.	.	.	.	.	.	.	.	.	.	.	.	.	.	.	.	.	.	.	.
RBG-18-0320-1	E. xiangfangensis	I	4-16	low	.	.	.	.	.	.	.	.	.	.	.	.	.	.	.	.	.	.	.	.	.	.	.	.	.	.	.	.	.	.	.	.	.	.	.	.	.	.	.	.	.	.	.	.	.
RBK-17-0375-1	E. xiangfangensis	I	4-16	low	.	.	.	.	.	.	.	.	.	.	.	.	.	.	.	.	.	.	.	.	.	.	.	.	.	.	.	.	.	.	.	.	.	.	.	.	.	.	.	.	.	.	.	.	.
RBF-18-0288-1	E. xiangfangensis	I	4-16	low	.	.	.	.	.	.	.	.	.	.	.	.	.	.	.	.	.	.	.	.	.	.	.	.	.	.	.	.	.	.	.	.	.	.	.	.	.	.	.	.	.	.	.	.	.
RPF-18-0225-1	E. xiangfangensis	I	NA	NA	.	.	.	.	.	.	.	.	.	.	.	.	.	.	.	.	.	.	.	.	.	.	.	.	.	.	.	.	.	.	.	.	.	.	.	.	.	.	.	.	.	.	.	.	.
RBB-18-0493-1	E. xiangfangensis	I	1-8	low	.	.	.	.	.	.	.	.	.	.	.	.	.	.	.	.	.	.	.	.	.	.	.	.	.	.	.	.	.	.	.	.	.	.	.	.	.	.	.	.	.	.	.	.	.
RBK-18-0264-1	E. xiangfangensis	I	4-16	low	.	.	.	.	.	.	.	.	.	.	.	.	.	.	.	.	.	.	.	.	.	.	.	.	.	.	.	.	.	.	.	.	.	.	.	.	.	.	.	.	.	.	.	.	.
Key:
.	same amino acid as in E. xiangfangensis RBK-17-0394
#N/A	Not applicable
-	amino acid absent
TM	transmembrane domain
phoQ*	truncated phoQ
[truncated: 50 more columns]

## Sheet: (c)arn_promoter_region
				phoP binding region																	-10 region
Position	species	MIC (µg/ml)	PAP	-75	-74	-72	-67	-66	-64	-63	-62	-61	-60	-59	-58	-57	-56	-55	-54	-53	-52	-51	-50	-49	-48	-47
RBL-17-0180-1	E_xiangfangensis	4-8	low	.	.	.	.	.	.	.	.	.	.	.	.	.	.	.	.	.	.	.	.	.	.	.
RPL-17-0177-1	E_xiangfangensis	8-16	low	.	.	.	.	.	.	.	.	.	.	.	.	.	.	.	.	.	.	.	.	.	.	.
RPF-18-0225-1	E_xiangfangensis	NA	NA	.	.	.	.	.	.	.	.	.	.	.	.	.	.	.	.	.	.	.	.	.	.	.
RPB-18-0510-1	E_xiangfangensis	NA	NA	.	.	.	.	.	.	.	.	.	.	.	.	.	.	.	.	.	.	.	.	.	.	.
RPB-18-0140-1	E_xiangfangensis	NA	NA	.	.	.	.	.	.	.	.	.	.	.	.	.	.	.	.	.	.	.	.	.	.	.
RPB-17-0209-1	E_xiangfangensis	NA	NA	.	.	.	.	.	.	.	.	.	.	.	.	.	.	.	.	.	.	.	.	.	.	.
RBK-17-0399-1	E_xiangfangensis	2021-08-04	low	.	.	.	.	.	.	.	.	.	.	.	.	.	.	.	.	.	.	.	.	.	.	.
RBK-17-0305-1	E_xiangfangensis	4-8	low	.	.	.	.	.	.	.	.	.	.	.	.	.	.	.	.	.	.	.	.	.	.	.
RBK-17-0014-2	E_xiangfangensis	2-4	low	.	.	.	.	.	.	.	.	.	.	.	.	.	.	.	.	.	.	.	.	.	.	.
RBG-17-0345-1	E_xiangfangensis	4-16	low	.	.	.	.	.	.	.	.	.	.	.	.	.	.	.	.	.	.	.	.	.	.	.
RBF-18-0318-1	E_xiangfangensis	6-16	low	.	.	.	.	.	.	.	.	.	.	.	.	.	.	.	.	.	.	.	.	.	.	.
RBF-18-0288-1	E_xiangfangensis	4-16	low	.	.	.	.	.	.	.	.	.	.	.	.	.	.	.	.	.	.	.	.	.	.	.
F-232	E_xiangfangensis	6-16	low	.	.	.	.	.	.	.	.	.	.	.	.	.	.	.	.	.	.	.	.	.	.	.
RBK-17-0394-1	E_xiangfangensis	6-16	low	G	T	G	T	T	G	A	A	A	A	A	C	G	C	A	T	C	G	G	C	A	T	T	reference nucleotides
RBK-17-0230-1	E_xiangfangensis	4-16	low	.	.	.	.	.	.	.	.	.	.	.	.	.	.	.	.	.	.	.	.	.	.	.
RBG-18-0186-1	E_xiangfangensis	2-4	low	.	.	.	.	.	.	.	.	.	.	.	.	.	.	.	.	.	.	.	.	.	.	.
RBG-18-0107-1	E_xiangfangensis	4-16	low	.	.	.	.	.	.	.	.	.	.	.	.	.	.	.	.	.	.	.	.	.	.	.
RBF-18-0058-1	E_xiangfangensis	4-16	low	.	.	.	.	.	.	.	.	.	.	.	.	.	.	.	.	.	.	.	.	.	.	.
RBB-18-0493-1	E_xiangfangensis	1-8	low	.	.	.	.	.	.	.	.	.	.	.	.	.	.	.	.	.	.	.	.	.	.	.
F03651	E_xiangfangensis	6-16	low	.	.	.	.	.	.	.	.	.	.	.	.	.	.	.	.	.	.	.	.	.	.	.
ESBL5467	E_xiangfangensis	6-16	low	.	.	.	.	.	.	.	.	.	.	.	.	.	.	.	.	.	.	.	.	.	.	.
ESBL3620	E_xiangfangensis	4-6	low	.	.	.	.	.	.	.	.	.	.	.	.	.	.	.	.	.	.	.	.	.	.	.
BK4767	E_xiangfangensis	NA	NA	.	.	.	.	.	.	.	.	.	.	.	.	.	.	.	.	.	.	.	.	.	.	.
And8437	E_xiangfangensis	1-4	low	.	.	.	.	.	.	.	.	.	.	.	.	.	.	.	.	.	.	.	.	.	.	.
RBK-18-0386-2	E_xiangfangensis	NA	NA	.	.	.	.	.	.	.	.	.	.	.	.	.	.	.	.	.	.	.	.	.	.	.
RBL-16-0059-1	E_xiangfangensis	4-64.	low	.	.	.	.	.	.	.	.	.	.	.	.	.	.	.	.	.	.	.	.	.	.	.
RBL-17-0079-1	E_xiangfangensis	4-8	low	.	.	.	.	.	.	.	.	.	.	.	.	.	.	.	.	.	.	.	.	.	.	.
RBL-17-0250-3	E_xiangfangensis	2-4.(phoQ*)	-ve	.	.	.	.	.	.	.	.	.	.	.	.	.	.	.	.	.	.	.	.	.	.	.
RBL-17-0286-1	E_xiangfangensis	4-8	low	.	.	.	.	.	.	.	.	.	.	.	.	.	.	.	.	.	.	.	.	.	.	.
RPB-17-0076-1	E_xiangfangensis	4-16	low	.	.	.	.	.	.	.	.	.	.	.	.	.	.	.	.	.	.	.	.	.	.	.
RPB-17-0356-1	E_xiangfangensis	4-64.	low	.	.	.	.	.	.	.	.	.	.	.	.	.	.	.	.	.	.	.	.	.	.	.
RPB-18-0151-1	E_xiangfangensis	NA	NA	.	.	.	.	.	.	.	.	.	.	.	.	.	.	.	.	.	.	.	.	.	.	.
RPB-18-0431-2	E_xiangfangensis	NA	NA	.	.	.	.	.	.	.	.	.	.	.	.	.	.	.	.	.	.	.	.	.	.	.
RPF-17-0168-1	E_xiangfangensis	1-6	low	.	.	.	.	.	.	.	.	.	.	.	.	.	.	.	.	.	.	.	.	.	.	.
RPK-17-0325-1	E_xiangfangensis	4-16	low	.	.	.	.	.	.	.	.	.	.	.	.	.	.	.	.	.	.	.	.	.	.	.
RPK-18-0360-1	E_xiangfangensis	NA	NA	.	.	.	.	.	.	.	.	.	.	.	.	.	.	.	.	.	.	.	.	.	.	.
RPL-16-0286-1	E_xiangfangensis	NA	NA	.	.	.	.	.	.	.	.	.	.	.	.	.	.	.	.	.	.	.	.	.	.	.
RBG-18-0320-1	E_xiangfangensis	4-16	low	.	.	.	.	.	.	.	.	.	.	.	.	.	.	.	.	.	.	.	.	.	.	.
RBK-17-0375-1	E_xiangfangensis	4-16	low	.	.	.	.	.	.	.	.	.	.	.	.	.	.	.	.	.	.	.	.	.	.	.
RPK-16-0522-1	E_xiangfangensis	4-16	low	.	.	.	.	.	.	.	.	.	.	.	.	.	.	.	.	.	.	.	.	.	.	.
RBK-17-0221-2	E_xiangfangensis	4-8	low	.	.	.	.	.	.	.	.	.	.	.	.	.	.	.	.	.	.	.	.	.	.	.
RBK-18-0264-1	E_xiangfangensis	4-16	low	.	.	.	.	.	.	.	.	.	.	.	.	.	.	.	.	.	.	.	.	.	.	.
RPB-17-0198-1	E_xiangfangensis	2-16	low	.	.	.	.	.	.	.	.	.	.	.	.	.	.	.	.	.	.	.	.	.	.	.
RPF-17-0260-1	E_xiangfangensis	4-6	low	.	.	.	.	.	.	.	.	.	.	.	.	.	.	.	.	.	.	.	.	.	.	.
RBF-18-0729-1	E_xiangfangensis	NA	NA	.	.	.	.	.	.	.	.	.	.	.	T	.	.	.	.	.	.	.	.	.	.	.
RPT-16-0054-1	E_xiangfangensis	NA	NA	.	.	.	.	.	.	.	.	.	.	.	.	.	.	.	.	.	.	.	.	.	.	.
BK6928	E_xiangfangensis	NA	NA	.	.	.	.	.	.	.	.	.	.	.	.	.	.	.	.	.	.	.	.	.	.	.
RBK-17-0497-1	E_xiangfangensis	4-8	low	.	.	.	.	.	.	.	.	.	.	.	.	.	.	.	.	.	.	.	.	.	.	.
RBL-17-0384-1	E_xiangfangensis	2-8	low	.	.	.	.	.	.	.	.	.	.	.	.	.	A	.	.	.	.	.	.	.	.	.
BK4615	E_xiangfangensis	2-16.	low	.	.	.	.	.	.	.	.	.	.	.	.	.	A	.	.	.	.	.	.	.	.	.
F-190	E_xiangfangensis	4-16	low	.	.	.	.	.	.	.	.	.	.	.	.	.	A	.	.	.	.	.	.	.	.	.
RBF-18-0302-3	E_xiangfangensis	2-64.	low	.	.	.	.	.	.	.	.	.	.	.	.	.	A	.	.	.	.	.	.	.	.	.
RPK-17-0437-2	E_xiangfangensis	NA	NA	.	.	.	.	.	.	.	.	.	.	.	.	.	A	.	.	.	.	.	.	.	.	.
ESBL3012	E_xiangfangensis	16-64	low	.	.	.	.	.	.	.	.	.	.	.	.	.	A	.	.	.	.	.	.	.	.	.
RBL-18-0073-1	E_xiangfangensis	4-16	low	.	.	.	.	.	.	.	.	.	.	.	.	.	A	.	.	.	.	.	.	.	.	.
RBG-17-0257-1	E_xiangfangensis	4-32	low	.	.	.	.	.	.	.	.	.	.	.	.	.	.	.	.	.	.	.	.	.	.	.
RBL-18-0346-1	E_xiangfangensis	64-128(mgrB*)	NA	.	.	.	.	.	.	.	.	.	.	.	.	.	.	.	.	.	.	.	.	.	.	.
RBL-17-0437-1	E_xiangfangensis	2-8	low	.	.	.	.	.	.	.	.	.	.	.	.	.	.	.	.	.	.	.	.	.	.	.
RPB-17-0516-3	E_xiangfangensis	6-16	low	.	.	.	.	.	.	.	.	.	.	.	.	.	.	.	.	.	.	.	.	.	.	.
RPF-17-0249-1	E_xiangfangensis	4-8	low	.	.	.	.	.	.	.	.	.	.	.	.	.	.	.	.	.	.	.	.	.	.	.
RBF-16-0075-1	E_xiangfangensis	4-32	low	.	.	.	.	.	.	.	.	.	.	.	.	.	.	.	.	.	.	.	.	.	.	.
RBL-17-0354-2	E_tabaci	32-64	high	.	.	.	.	.	.	.	.	.	.	.	.	.	.	G	.	.	.	.	.	.	.	.
RPK-18-0479-1	E_cancerogenus	64-128	high	.	.	.	.	.	.	.	.	.	.	.	.	.	G	.	C	.	.	.	.	T	.	.
F-1367	E_bugandensis	NA	NA	.	.	.	.	.	.	.	.	.	.	.	.	.	A	.	A	A	A	.	T	.	A	.
RBG-17-0246-1	E_bugandensis	64-128	high	.	.	.	.	.	.	.	.	.	.	.	.	.	A	.	A	A	A	.	T	.	A	.
BK7261	E_bugandensis	NA	high	.	.	.	.	.	.	.	.	.	.	.	.	.	A	.	A	A	A	.	T	.	A	.
RPF-18-0143-1	E_bugandensis	NA	NA	.	.	.	.	.	.	.	.	.	.	.	.	.	A	.	A	A	A	.	T	.	A	.
Survcare220	E_bugandensis	NA	high	.	.	.	.	.	.	.	.	.	.	.	.	.	A	.	A	A	A	.	T	.	A	.
RPK-18-0157-1	E_cloacae	NA	high	.	.	A	A	C	.	.	.	.	.	.	.	.	A	.	C	.	.	.	T	.	A	.
ESBL2036	E_cloacae	NA	high	.	.	A	A	C	.	.	.	.	.	.	.	.	G	T	C	.	.	C	T	.	A	.
RBF-17-0514-1	E_cloacae	NA	high	.	.	A	A	C	.	.	.	.	.	.	.	.	G	T	C	.	.	C	T	.	A	.
RBL-17-0228-1	E_cloacae	NA	NA	.	.	A	A	C	.	.	.	.	.	.	.	.	G	T	C	.	.	C	T	.	A	.
RBG-17-0309-2	E_ludwigii	NA	NA	.	.	.	.	.	.	.	.	.	.	.	.	.	A	G	C	.	.	.	.	.	.	.
RBL-18-0029-2	E_ludwigii	NA	NA	.	.	.	.	.	.	.	.	.	.	.	.	.	A	G	C	.	.	.	.	.	.	.
RBL-18-0307-1	E_ludwigii	NA	high	.	.	.	.	.	.	.	.	.	.	.	.	.	A	G	C	.	.	.	.	.	.	.
RBG-18-0242-1	E_ludwigii	NA	NA	.	.	.	.	.	.	.	.	.	.	.	.	.	A	G	C	.	.	.	.	.	.	.
RPL-16-0036-1	E_ludwigii	NA	NA	.	.	.	.	.	.	.	.	.	.	.	.	.	A	G	C	.	.	.	.	.	.	.
RPF-17-0222-2	E_ludwigii	NA	NA	.	.	.	.	.	.	.	.	.	.	.	.	.	A	G	C	.	.	.	.	.	.	.
RPG-17-0577-1	E_ludwigii	NA	NA	.	.	.	.	.	.	.	.	.	.	.	.	.	A	G	C	.	.	.	.	.	.	.
RPK-17-0322-2	E_ludwigii	NA	NA	.	.	.	.	.	.	.	.	.	.	.	.	.	A	G	C	.	.	.	.	.	.	.
F-8789	E_ludwigii	8-64.	high	.	.	.	.	.	.	.	.	.	.	.	.	.	A	G	C	.	.	.	.	.	.	.
RPK-18-0156-1	E_ludwigii	NA	NA	.	.	.	.	.	.	.	.	.	.	.	.	.	A	G	C	.	.	.	.	.	.	.
RPL-18-0213-1	E_ludwigii	NA	NA	.	.	.	.	.	.	.	.	.	.	.	.	.	A	G	C	.	.	.	.	.	.	.
RPB-18-0460-1	E_ludwigii	NA	NA	.	.	.	.	.	.	.	.	.	.	.	.	.	A	G	C	.	.	.	.	.	.	.
RPB-16-0320-1	E_ludwigii	NA	NA	.	.	.	.	.	.	.	.	.	.	.	.	.	A	G	C	.	.	.	.	.	.	.
RBL-18-0461-2	E_ludwigii	NA	NA	.	.	.	.	.	.	.	.	.	.	.	.	.	A	G	C	.	.	.	.	.	.	.
RBF-17-0584-3	E_ludwigii	NA	NA	.	.	.	.	.	.	.	.	.	.	.	.	.	A	G	C	.	.	.	.	.	.	.
BK6227	E_ludwigii	NA	NA	.	.	.	.	.	.	.	.	.	.	.	.	.	A	G	C	.	.	.	.	.	.	.
And4961	E_ludwigii	NA	NA	.	.	.	.	.	.	.	.	.	.	.	.	.	A	G	C	.	.	.	.	.	.	.
RBL-18-0456-2	E_kobei	NA	NA	.	.	.	.	.	.	.	.	.	.	.	.	.	G	.	C	.	.	.	.	.	.	.
RPK-18-0072-1	E_kobei	NA	NA	.	.	.	.	.	.	.	.	.	.	.	.	.	G	.	C	.	.	.	.	.	.	.
RPB-18-0042-1	E_kobei	NA	high	.	.	.	.	.	.	.	.	.	.	.	.	.	G	.	C	.	.	.	.	.	.	.
RBL-16-0092-1	E_kobei	NA	NA	.	.	.	.	.	.	.	.	.	.	.	.	.	G	.	C	.	.	.	.	.	.	.
RBG-16-0046-1	E_kobei	NA	NA	.	.	.	.	.	.	.	.	.	.	.	.	.	G	.	C	.	.	.	.	.	.	.
RPL-18-0150-1	E_kobei	NA	high	.	.	.	.	.	.	.	.	.	.	.	.	.	G	.	C	.	.	.	.	.	.	.
RBL-17-0362-1	E_kobei	NA	NA	.	.	.	.	.	.	.	.	.	.	.	.	.	G	.	C	.	.	.	.	.	.	.
BK6664	E_kobei	NA	high	.	.	.	.	.	.	.	.	.	.	.	.	.	G	.	C	.	.	.	.	.	.	.
RBF-17-0338-1	E_kobei	NA	NA	.	.	.	.	.	.	.	.	.	.	.	.	.	G	.	C	.	.	.	.	.	.	.
RBG-18-0415-1	E_asburiae	>128	high	.	.	.	.	.	.	.	.	.	.	.	.	.	G	G	C	T	.	.	.	.	.	.
RPT-18-0057-1	E_roggenkampii	NA	NA	.	.	.	.	.	.	.	.	.	.	G	.	.	G	G	C	T	.	.	.	.	.	.
F-147	E_vonholyi	2-4.(phoQ*)	-ve	.	.	.	.	.	.	.	.	.	.	.	.	.	G	G	C	.	A	.	.	.	.	.
BK5433	E_asburiae	>128	high	.	.	.	.	.	.	.	.	.	.	.	.	.	G	G	C	T	.	.	.	.	.	.
RPT-17-0298-1	E_roggenkampii	NA	NA	.	.	.	.	.	.	.	.	.	.	G	.	.	G	G	C	T	.	.	.	.	.	.
RPB-17-0516-2	E_roggenkampii	64->128	high	.	.	.	.	.	.	.	.	.	.	G	.	.	G	G	C	T	.	.	.	.	.	.
RPK-18-0503-2	E_roggenkampii	NA	high	.	.	.	.	.	.	.	.	.	.	G	.	.	G	G	C	T	.	.	.	.	.	.
RPG-17-0579-1	E_roggenkampii	NA	NA	.	.	.	.	.	.	.	.	.	.	G	.	.	G	G	C	T	.	.	.	.	.	.
RPK-16-0191-2	E_roggenkampii	NA	NA	.	.	.	.	.	.	.	.	.	.	G	.	.	G	G	C	T	.	.	.	.	.	.
RPK-18-0173-1	E_roggenkampii	NA	NA	.	.	.	.	.	.	.	.	.	.	G	.	.	G	G	C	T	.	.	.	.	.	.
RBK-17-0344-2	E_roggenkampii	NA	NA	.	.	.	.	.	.	.	.	.	.	G	.	.	G	G	C	T	.	.	.	.	.	.
RPK-18-0524-1	E_roggenkampii	NA	high	.	.	.	.	.	.	.	.	.	.	G	.	.	G	G	C	T	.	.	.	.	.	.
RBK-18-0141-1	E_chengduensis	64-128	high	T	C	A	.	C	A	G	C	G	C	C	.	A	T	T	A	.	.	A	.	.	G	C
RBF-18-0023-1	E_ludwigii	NA	NA	T	C	A	.	.	A	G	C	G	C	C	.	A	T	.	A	.	.	A	.	.	G	C
RBF-18-0074-1	E_ludwigii	NA	high	T	C	A	.	.	A	G	C	G	C	C	.	A	T	.	A	.	.	A	.	.	G	C
RBF-18-0271-1	E_ludwigii	NA	NA	T	C	A	.	.	A	G	C	G	C	C	.	A	T	.	A	.	.	A	.	.	G	C
RBF-18-0335-1	E_ludwigii	NA	NA	T	C	A	.	.	A	G	C	G	C	C	.	A	T	.	A	.	.	A	.	.	G	C
RPF-18-0247-1	E_ludwigii	NA	NA	T	C	A	.	.	A	G	C	G	C	C	.	A	T	.	A	.	.	A	.	.	G	C
RPG-17-0504-1	E_ludwigii	NA	NA	T	C	A	.	.	A	G	C	G	C	C	.	A	T	.	A	.	.	A	.	.	G	C
Key:
.	same nucleotide as in E. xiangfangensis RBK-17-0394
NA	Not analysed
#N/A	Not applicable
phoQ*	truncated phoQ

## Sheet: (d)mgrB
isolate_name	Species	Lineage	MIC (µg/ml)	PAP	10	11	14	27	33	38	40	41	42	43	44	45	46	47	48
RPK-18-0157-1	E. cloacae	#N/A	NA	high	V	.	.	.	.	V	A	.	.	.	.	.	.	.	.
RBL-17-0228-1	E. cloacae	#N/A	NA	NA	V	.	.	.	.	V	A	.	.	.	.	.	.	.	.
ESBL2036	E. cloacae	#N/A	NA	high	V	.	.	.	.	V	A	.	.	.	.	.	.	.	.
RBF-17-0514-1	E. cloacae	#N/A	NA	high	V	.	.	.	.	V	A	.	.	.	.	.	.	.	.
RBF-18-0271-1	E. ludwigii	#N/A	NA	NA	.	.	V	.	.	V	A	.	.	.	.	.	.	.	.
RPL-18-0213-1	E. ludwigii	#N/A	NA	NA	.	.	V	.	.	V	A	.	.	.	.	.	.	.	.
RPB-16-0320-1	E. ludwigii	#N/A	NA	NA	.	.	V	.	.	V	A	.	.	.	.	.	.	.	.
And4961	E. ludwigii	#N/A	NA	NA	.	.	V	.	.	V	A	.	.	.	.	.	.	.	.
RBF-18-0335-1	E. ludwigii	#N/A	NA	NA	.	.	V	.	.	V	A	.	.	.	.	.	.	.	.
RBG-18-0242-1	E. ludwigii	#N/A	NA	NA	.	.	V	.	.	V	A	.	.	.	.	.	.	.	.
RPF-17-0222-2	E. ludwigii	#N/A	NA	NA	.	.	V	.	.	V	A	.	.	.	.	.	.	.	.
RPG-17-0577-1	E. ludwigii	#N/A	NA	NA	.	.	V	.	.	V	A	.	.	.	.	.	.	.	.
RPK-17-0322-2	E. ludwigii	#N/A	NA	NA	.	.	V	.	.	V	A	.	.	.	.	.	.	.	.
RPB-18-0460-1	E. ludwigii	#N/A	NA	NA	.	.	V	.	.	V	A	.	.	.	.	.	.	.	.
RPG-17-0504-1	E. ludwigii	#N/A	NA	NA	.	.	V	.	.	V	A	.	.	.	.	.	.	.	.
RBF-17-0584-3	E. ludwigii	#N/A	NA	NA	.	.	V	.	.	V	A	.	.	.	.	.	.	.	.
RPL-16-0036-1	E. ludwigii	#N/A	NA	NA	.	.	V	.	.	V	A	.	.	.	.	.	.	.	.
F-8789	E. ludwigii	#N/A	8-64.	high	.	.	V	.	.	V	A	.	.	.	.	.	.	.	.
RBL-18-0307-1	E. ludwigii	#N/A	NA	high	.	.	V	.	.	V	A	.	.	.	.	.	.	.	.
BK6227	E. ludwigii	#N/A	NA	NA	.	.	V	.	.	V	A	.	.	.	.	.	.	.	.
RBF-18-0023-1	E. ludwigii	#N/A	NA	NA	.	.	V	.	.	V	A	.	.	.	.	.	.	.	.
RBL-18-0461-2	E. ludwigii	#N/A	NA	NA	.	.	V	.	.	V	A	.	.	.	.	.	.	.	.
RBF-18-0074-1	E. ludwigii	#N/A	NA	high	.	.	V	.	.	V	A	.	.	.	.	.	.	.	.
RPF-18-0247-1	E. ludwigii	#N/A	NA	NA	.	.	V	.	.	V	A	.	.	.	.	.	.	.	.
RPK-18-0156-1	E. ludwigii	#N/A	NA	NA	.	.	V	.	.	V	A	.	.	.	.	.	.	.	.
RBG-17-0309-2	E. ludwigii	#N/A	NA	NA	.	.	V	.	.	V	A	.	.	.	.	.	.	.	.
RBL-18-0029-2	E. ludwigii	#N/A	NA	NA	.	.	V	.	.	V	A	.	.	.	.	.	.	.	.
RPK-18-0479-1	E. cancerogenus	#N/A	64-128	high	.	.	.	.	.	V	A	.	.	.	.	.	.	.	.
RBL-17-0354-2	E. tabaci	#N/A	32-64	high	V	.	V	.	.	V	A	.	.	.	.	.	.	.	.
RBF-17-0338-1	E. kobei	#N/A	NA	NA	.	V	.	.	.	V	A	.	.	.	.	.	.	.	.
RPK-18-0072-1	E. kobei	#N/A	NA	NA	.	V	.	.	.	V	A	.	.	.	.	.	.	.	.
RPB-18-0042-1	E. kobei	#N/A	NA	high	.	V	.	.	.	V	A	.	.	.	.	.	.	.	.
RPL-18-0150-1	E. kobei	#N/A	NA	high	.	V	.	.	.	V	A	.	.	.	.	.	.	.	.
RBL-18-0456-2	E. kobei	#N/A	NA	NA	.	V	.	.	.	V	A	.	.	.	.	.	.	.	.
BK6664	E. kobei	#N/A	NA	high	.	V	.	.	.	V	A	.	.	.	.	.	.	.	.
RBG-16-0046-1	E. kobei	#N/A	NA	NA	.	V	.	.	.	V	A	.	.	.	.	.	.	.	.
RBL-16-0092-1	E. kobei	#N/A	NA	NA	.	V	.	.	.	V	A	.	.	.	.	.	.	.	.
RBL-17-0362-1	E. kobei	#N/A	NA	NA	.	V	.	.	.	V	A	.	.	.	.	.	.	.	.
RBG-17-0246-1	E. bugandensis	#N/A	64-128	high	.	.	.	.	.	V	A	.	.	.	.	.	.	.	.
BK7261	E. bugandensis	#N/A	NA	high	.	.	.	.	.	V	A	.	.	.	.	.	.	.	.
F-1367	E. bugandensis	#N/A	NA	NA	.	.	.	.	.	V	A	.	.	.	.	.	.	.	.
RPF-18-0143-1	E. bugandensis	#N/A	NA	NA	.	.	.	.	.	V	A	.	.	.	.	.	.	.	.
Survcare220	E. bugandensis	#N/A	NA	high	.	.	.	.	.	V	A	.	.	.	.	.	.	.	.
RBK-18-0141-1	E. chengduensis	#N/A	64-128	high	.	.	.	.	.	V	A	.	.	.	.	.	.	.	.
F-147	E. vonholyi	#N/A	2-4.(phoQ*)	-ve	V	.	.	.	.	V	A	.	.	.	.	.	.	.	.
BK5433	E. asburiae	#N/A	>128	high	.	.	.	.	.	V	A	.	.	.	.	.	.	.	.
RBG-18-0415-1	E. asburiae	#N/A	>128	high	.	.	.	.	.	V	A	.	.	.	.	.	.	.	.
RPT-18-0057-1	E. roggenkampii	#N/A	NA	NA	.	.	.	.	.	V	A	.	.	.	.	.	.	.	.
RPK-16-0191-2	E. roggenkampii	#N/A	NA	NA	.	.	.	.	.	V	A	.	.	.	.	.	.	.	.
RPB-17-0516-2	E. roggenkampii	#N/A	64->128	high	.	.	.	.	.	V	A	.	.	.	.	.	.	.	.
RPG-17-0579-1	E. roggenkampii	#N/A	NA	NA	.	.	.	.	.	V	A	.	.	.	.	.	.	.	.
RPT-17-0298-1	E. roggenkampii	#N/A	NA	NA	.	.	.	.	.	V	A	.	.	.	.	.	.	.	.
RBK-17-0344-2	E. roggenkampii	#N/A	NA	NA	.	.	.	.	.	V	A	.	.	.	.	.	.	.	.
RPK-18-0503-2	E. roggenkampii	#N/A	NA	high	.	.	.	.	.	V	A	.	.	.	.	.	.	.	.
RPK-18-0173-1	E. roggenkampii	#N/A	NA	NA	.	.	.	.	.	V	A	.	.	.	.	.	.	.	.
RPK-18-0524-1	E. roggenkampii	#N/A	NA	high	.	.	.	.	.	V	A	.	.	.	.	.	.	.	.
F00728	E. quasihormaechei	#N/A	4-6.(lack arn)	-ve	V	.	.	.	.	.	.	.	.	.	.	.	.	.	.
RPF-18-0297-1	E. xiangfangensis	II	NA	NA	.	.	.	.	.	.	.	.	.	.	.	.	.	.	.
RBF-18-0266-1	E. xiangfangensis	II	NA	NA	.	.	.	.	.	.	.	.	.	.	.	.	.	.	.
RBB-17-0902-1	E. xiangfangensis	II	NA	NA	.	.	.	.	.	.	.	.	.	.	.	.	.	.	.
RBL-17-0146-1	E. xiangfangensis	II	4	-ve	.	.	.	.	.	.	.	.	.	.	.	.	.	.	.
RPL-18-0075-1	E. xiangfangensis	II	NA	NA	.	.	.	.	.	.	.	.	.	.	.	.	.	.	.
RBG-17-0085-1	E. xiangfangensis	II	NA	NA	.	.	.	.	.	.	.	.	.	.	.	.	.	.	.
RBG-17-0358-1	E. xiangfangensis	II	NA	NA	.	.	.	.	.	.	.	.	.	.	.	.	.	.	.
RBG-17-0389-1	E. xiangfangensis	II	NA	NA	.	.	.	.	.	.	.	.	.	.	.	.	.	.	.
RBL-18-0105-1	E. xiangfangensis	II	NA	NA	.	.	.	.	.	.	.	.	.	.	.	.	.	.	.
RBF-18-0378-1	E. xiangfangensis	II	NA	NA	.	.	.	.	.	.	.	.	.	.	.	.	.	.	.
RPT-17-0081-1	E. xiangfangensis	II	NA	NA	.	.	.	.	.	.	.	.	.	.	.	.	.	.	.
RBL-18-0073-2	E. xiangfangensis	II	NA	NA	.	.	.	.	.	.	.	.	.	.	.	.	.	.	.
RPB-18-0456-1	E. xiangfangensis	II	NA	NA	.	.	.	.	.	.	.	.	.	.	.	.	.	.	.
RBB-16-0116-1	E. xiangfangensis	II	NA	NA	.	.	.	.	.	.	.	.	.	.	.	.	.	.	.
RBK-16-0078-3	E. xiangfangensis	II	NA	NA	.	.	.	.	.	.	.	.	.	.	.	.	.	.	.
BK6046	E. xiangfangensis	II	NA	NA	.	.	.	.	.	.	.	.	.	.	.	.	.	.	.
RBL-18-0082-1	E. xiangfangensis	II	2-4	-ve	.	.	.	.	.	.	.	.	.	.	.	.	.	.	.
RPT-16-0254-2	E. xiangfangensis	II	2-4.	-ve	.	.	.	.	.	.	.	.	.	.	.	.	.	.	.
RBL-17-0167-1	E. xiangfangensis	II	NA	NA	.	.	.	.	.	.	.	.	.	.	.	.	.	.	.
RPK-18-0503-1	E. xiangfangensis	II	NA	NA	.	.	.	.	.	.	.	.	.	.	.	.	.	.	.
RPF-18-0104-1	E. xiangfangensis	II	NA	NA	.	.	.	.	.	.	.	.	.	.	.	.	.	.	.
RBF-17-0511-1	E. xiangfangensis	II	NA	NA	.	.	.	.	.	.	.	.	.	.	.	.	.	.	.
RBF-18-0052-1	E. xiangfangensis	II	NA	NA	.	.	.	.	.	.	.	.	.	.	.	.	.	.	.
RBL-18-0072-1	E. xiangfangensis	II	NA	NA	.	.	.	.	.	.	.	.	.	.	.	.	.	.	.
RPB-17-0441-1	E. xiangfangensis	II	NA	NA	.	.	.	.	.	.	.	.	.	.	.	.	.	.	.
RPL-18-0211-3	E. xiangfangensis	II	NA	NA	.	.	.	.	.	.	.	.	.	.	.	.	.	.	.
RBF-17-0256-1	E. xiangfangensis	III	NA	NA	.	.	.	.	.	.	.	.	.	.	.	.	.	.	.
And1463	E. xiangfangensis	III	NA	NA	.	.	.	.	.	.	.	.	.	.	.	.	.	.	.
RBF-18-0224-1	E. xiangfangensis	III	2-6	-ve
RBG-18-0378-1	E. xiangfangensis	III	2-4.	-ve	.	.	.	.	.	.	.	.	.	.	.	.	.	.	.
And6885	E. xiangfangensis	III	NA	NA	.	.	.	.	.	.	.	.	.	.	.	.	.	.	.
RPB-18-0433-1	E. xiangfangensis	III	NA	NA	.	.	.	.	.	.	.	.	.	.	.	.	.	.	.
And2481	E. xiangfangensis	III	2-4	-ve	.	.	.	.	.	.	.	.	.	.	.	.	.	.	.
RBK-18-0208-1	E. xiangfangensis	III	NA	NA	.	.	.	.	.	.	.	.	.	.	.	.	.	.	.
And2854	E. xiangfangensis	III	NA	NA	.	.	.	.	.	.	.	.	.	.	.	.	.	.	.
RBL-17-0419-2	E. xiangfangensis	III	NA	NA	.	.	.	.	.	.	.	.	.	.	.	.	.	.	.
RPF-18-0265-1	E. xiangfangensis	III	NA	NA	.	.	.	.	.	.	.	.	.	.	.	.	.	.	.
RBF-16-0042-1	E. xiangfangensis	IV	4-8.	-ve	.	.	.	.	.	.	.	.	.	.	.	.	.	.	.
RBG-18-0241-1	E. xiangfangensis	IV	6	-ve	.	.	.	.	.	.	.	.	.	.	.	.	.	.	.
RBK-17-0398-1	E. xiangfangensis	IV	2-6.	-ve	.	.	.	.	.	.	.	.	.	.	.	.	.	.	.
RBL-17-0312-2	E. xiangfangensis	IV	2-6.	-ve	.	.	.	.	.	.	.	.	.	.	.	.	.	.	.
RPB-18-0431-1	E. xiangfangensis	IV	2-6.	-ve	.	.	.	.	.	.	.	.	.	.	.	.	.	.	.
RBL-17-0298-1	E. xiangfangensis	IV	1-16.	-ve	.	.	.	.	.	.	.	.	.	.	.	.	.	.	.
RBL-18-0138-1	E. xiangfangensis	IV	2-4.	-ve	.	.	.	.	.	.	.	.	.	.	.	.	.	.	.
RBK-17-0305-1	E. xiangfangensis	I	4-8	low	.	.	.	.	.	.	.	.	.	.	.	.	.	.	.
RBK-17-0497-1	E. xiangfangensis	I	4-8	low	.	.	.	.	.	.	.	.	.	.	.	.	.	.	.
RBG-17-0272-1	E. xiangfangensis	I	4	low	.	.	.	.	.	.	.	.	.	.	.	.	.	.	.
RBG-17-0018-1	E. xiangfangensis	I	2-4	low	.	.	.	.	.	.	.	.	.	.	.	.	.	.	.
RPK-17-0332-1	E. xiangfangensis	I	2-4	low	.	.	.	.	.	.	.	.	.	.	.	.	.	.	.
BK6928	E. xiangfangensis	I	NA	NA	.	.	.	.	.	.	.	.	.	.	.	.	.	.	.
And8437	E. xiangfangensis	I	1-4	low	.	.	.	.	.	.	.	.	.	.	.	.	.	.	.
RPB-17-0076-1	E. xiangfangensis	I	4-16	low	.	.	.	.	.	.	.	.	.	.	.	.	.	.	.
BK4767	E. xiangfangensis	I	NA	NA	.	.	.	.	.	.	.	.	.	.	.	.	.	.	.
RBG-18-0186-1	E. xiangfangensis	I	2-4	low	.	.	.	.	.	.	.	.	.	.	.	.	.	.	.
RBL-16-0059-1	E. xiangfangensis	I	4-64.	low	.	.	.	.	.	.	.	.	.	.	.	.	.	.	.
RBL-17-0079-1	E. xiangfangensis	I	4-8	low	.	.	.	.	.	.	.	.	.	.	.	.	.	.	.
RPL-16-0286-1	E. xiangfangensis	I	NA	NA	.	.	.	.	.	.	.	.	.	.	.	.	.	.	.
RPF-17-0168-1	E. xiangfangensis	I	1-6	low	.	.	.	.	.	.	.	.	.	.	.	.	.	.	.
RBK-17-0394-1	E. xiangfangensis	I	6-16	low	I	I	I	M	Q	I	S	I	N	K	F	I	P	W	X	amino acids in reference sequence
RPK-16-0522-1	E. xiangfangensis	I	4-16	low	.	.	.	.	.	.	.	.	.	.	.	.	.	.	.
RBF-18-0302-3	E. xiangfangensis	I	2-64.	low	.	.	.	.	.	.	.	.	.	.	.	.	.	.	.
RBF-18-0318-1	E. xiangfangensis	I	6-16	low	.	.	.	.	.	.	.	.	.	.	.	.	.	.	.
RPB-17-0356-1	E. xiangfangensis	I	4-64.	low	.	.	.	.	.	.	.	.	.	.	.	.	.	.	.
RPB-18-0151-1	E. xiangfangensis	I	NA	NA	.	.	.	.	.	.	.	.	.	.	.	.	.	.	.
RPK-18-0360-1	E. xiangfangensis	I	NA	NA	.	.	.	.	.	.	.	.	.	.	.	.	.	.	.
RBK-17-0230-1	E. xiangfangensis	I	4-16	low	.	.	.	.	.	.	.	M	.	.	.	.	.	.	.
RPK-17-0325-1	E. xiangfangensis	I	4-16	low	.	.	.	.	.	.	.	.	.	.	.	.	.	.	.
RBK-17-0399-1	E. xiangfangensis	I	4-8	low	.	.	.	.	.	.	.	.	.	.	.	.	.	.	.
RBL-17-0286-1	E. xiangfangensis	I	4-8	low	.	.	.	.	.	.	.	.	.	.	.	.	.	.	.
RPB-18-0431-2	E. xiangfangensis	I	NA	NA	.	.	.	.	.	.	.	.	.	.	.	.	.	.	.
RBK-18-0386-2	E. xiangfangensis	I	NA	NA	.	.	.	.	.	.	.	.	.	.	.	.	.	.	.
RBG-17-0257-1	E. xiangfangensis	I	4-32	low	.	.	.	.	.	.	.	.	.	.	.	.	.	.	.
RPB-18-0510-1	E. xiangfangensis	I	NA	NA	.	.	.	.	.	.	.	.	.	.	.	.	.	.	.
RBL-17-0250-3	E. xiangfangensis	I	2-4.(phoQ*)	-ve	.	.	.	.	.	.	.	.	.	.	.	.	.	.	.
RBL-17-0180-1	E. xiangfangensis	I	4-8	low	.	.	.	.	.	.	.	.	.	.	.	.	.	.	.
RPL-17-0177-1	E. xiangfangensis	I	8-16	low	.	.	.	.	.	.	.	.	.	.	.	.	.	.	.
RPB-17-0516-3	E. xiangfangensis	I	6-16	low	.	.	.	.	.	.	.	.	.	.	.	.	.	.	.
ESBL3012	E. xiangfangensis	I	16-64	low	.	.	.	T	.	.	.	.	.	.	.	.	.	.	.
RBL-18-0346-1	E. xiangfangensis	I	64-128(mgrB*)	NA	.	.	.	.	.	.	.	.	T	X	-	-	-	-	-
RBL-17-0437-1	E. xiangfangensis	I	2-8	low	.	.	.	.	.	.	.	.	.	.	.	.	.	.	.
RPF-17-0249-1	E. xiangfangensis	I	4-8	low	.	.	.	.	.	.	.	.	.	.	.	.	.	.	.
RPB-18-0140-1	E. xiangfangensis	I	NA	NA	.	.	.	.	.	.	.	.	.	.	.	.	.	.	.
RPF-17-0260-1	E. xiangfangensis	I	4-6	low	.	.	.	.	.	.	.	.	.	.	.	.	.	.	.
RBK-17-0221-2	E. xiangfangensis	I	4-8	low	.	.	.	.	.	.	.	.	.	.	.	.	.	.	.
RPT-16-0054-1	E. xiangfangensis	I	NA	NA	.	.	.	.	.	.	.	.	.	.	.	.	.	.	.
RBG-18-0107-1	E. xiangfangensis	I	4-16	low	.	.	.	.	.	.	.	.	.	.	.	.	.	.	.
ESBL3620	E. xiangfangensis	I	4-6	low	.	.	.	.	.	.	.	.	.	.	.	.	.	.	.
RBG-17-0345-1	E. xiangfangensis	I	4-16	low	.	.	.	.	.	.	.	.	.	.	.	.	.	.	.
RBK-17-0014-2	E. xiangfangensis	I	2-4	low	.	.	.	.	.	.	.	.	.	.	.	.	.	.	.
F-232	E. xiangfangensis	I	6-16	low	.	.	.	.	.	.	.	.	.	.	.	.	.	.	.
RBL-17-0384-1	E. xiangfangensis	I	2-8	low	.	.	.	.	.	.	.	.	.	.	.	.	.	.	.
F03651	E. xiangfangensis	I	6-16	low	.	.	.	.	.	.	.	.	.	.	.	.	.	.	.
RBF-16-0075-1	E. xiangfangensis	I	4-32	low	.	.	.	.	R	.	.	.	.	.	.	.	.	.	.
RBL-18-0073-1	E. xiangfangensis	I	4-16	low	.	.	.	.	.	.	.	.	.	.	.	.	.	.	.
RPK-17-0437-2	E. xiangfangensis	I	NA	NA	.	.	.	.	.	.	.	.	.	.	.	.	.	.	.
BK4615	E. xiangfangensis	I	2-16	low	.	.	.	.	.	.	.	.	.	.	.	.	.	.	.
F-190	E. xiangfangensis	I	4-16	low	.	.	.	.	.	.	.	.	.	.	.	.	.	.	.
RPB-17-0209-1	E. xiangfangensis	I	NA	NA	.	.	.	.	.	.	.	.	.	.	.	.	.	.	.
ESBL5467	E. xiangfangensis	I	6-16	low	.	.	.	.	.	.	.	.	.	.	.	.	.	.	.
RBF-18-0058-1	E. xiangfangensis	I	4-16	low	.	.	.	.	.	.	.	.	.	.	.	.	.	.	.
RBF-18-0729-1	E. xiangfangensis	I	NA	NA	.	.	.	.	.	.	.	.	.	.	.	.	.	.	.
RPB-17-0198-1	E. xiangfangensis	I	2-16	low	.	.	.	.	.	.	.	.	.	.	.	.	.	.	.
RBG-18-0320-1	E. xiangfangensis	I	4-16	low	.	.	.	.	.	.	.	.	.	.	.	.	.	.	.
RBK-17-0375-1	E. xiangfangensis	I	4-16	low	.	.	.	.	.	.	.	.	.	.	.	.	.	.	.
RBF-18-0288-1	E. xiangfangensis	I	4-16	low	.	.	.	.	.	.	.	.	.	.	.	.	.	.	.
RPF-18-0225-1	E. xiangfangensis	I	NA	NA	.	.	.	.	.	.	.	.	.	.	.	.	.	.	.
RBB-18-0493-1	E. xiangfangensis	I	1-8	low	.	.	.	.	.	.	.	.	.	.	.	.	.	.	.
RBK-18-0264-1	E. xiangfangensis	I	4-16	low	.	.	.	.	.	.	.	.	.	.	.	.	.	.	.
Key:
.	same amino acid as in E. xiangfangensis RBK-17-0394
NA	Not analysed
#N/A	Not applicable
phoQ*	truncated phoQ
